# Supplementary material
Source: publisher figshare collection journal article supplement (https://acs.figshare.com/ndownloader/files/18001967)
Supplement: Supplementary file 1 [file 18001967]

## Sheet: Description
Data Work-Up Description
Columns were extracted from the proteinGroups.txt MaxQuant output file and analyzed using Perseus. LFQ Intensity values were were filtered for values only identified by site, reverse, or potential contaminants and then log2 transformed. Data presented here was subsequently filtered for valid values, ensuring that a given protein was ID'd in at least two DMSO treated lysate replicates. To determin…
Note: Lysate used to profile compound 1 was spiked with 33.3 nM recombinant IRE1α*, while compounds 3, 8, 13, and 15 were spiked with 33.3 nM recombinant IRE1β*.

## Sheet: 1
Protein names	Gene names	Protein IDs	Majority protein IDs	GOMF name	Pfam	Peptides	Razor + unique peptides	Unique peptides	Sequence coverage [%]	Unique + razor sequence coverage [%]	Unique sequence coverage [%]	Mol. weight [kDa]	Q-value	Score	Intensity	MS/MS count	LFQ intensity DMSO Replicate 1	LFQ intensity DMSO Replicate 2	LFQ intensity DMSO Replicate 3	LFQ intensity DMSO Replicate 4	LFQ intensity Compound 1 Replicate 1	LFQ intensity Compound 1 Replicate 2	LFQ intensity Compound 1 Replicate 3	LFQ intensity Compound 1 Replicate 4	Student's T-test Difference DMSO vs. Compound 1	(-)Log Student's T-test p-value DMSO vs. Compound 1
Uncharacterized protein FLJ45252	AAK1	A0A096LP25;Q6ZSR9;A0A096LNZ0	A0A096LP25;Q6ZSR9;A0A096LNZ0		BMP2K_C	27	21	21	67.1	53.4	53.4	54.448	0	175.66	2428200000	391	27.4445	27.4182	27.6302	27.3207	27.4465	27.4635	26.897	27.3673	0.159839	0.490046
AP2-associated protein kinase 1	AAK1	Q2M2I8-2;Q2M2I8;E9PG46;A0A096LP60	Q2M2I8-2;Q2M2I8;E9PG46	adenyl nucleotide binding;adenyl ribonucleotide binding;AP-2 adaptor complex binding;ATP binding;binding;catalytic activity;kinase activity;Notch binding;nucleotide binding;phosphotransferase activity, alcohol group as acceptor;protein binding;protein complex binding;protein kinase activity;protein serine/threonine kinase activity;purine nucleotide binding;purine ribonucleoside triphosphate bindi…	Pkinase	48	48	38	64.4	64.4	54.2	93.577	0	323.31	6981800000	973	28.9386	28.9216	28.9583	28.5948	28.6628	28.9409	28.6027	28.8854	0.080359	0.278418
ATP-binding cassette sub-family B member 6, mitochondrial	ABCB6	H7BXK9;Q9NP58-4;Q9NP58	H7BXK9;Q9NP58-4;Q9NP58	active transmembrane transporter activity;adenyl nucleotide binding;adenyl ribonucleotide binding;ATP binding;ATPase activity;ATPase activity, coupled;ATPase activity, coupled to movement of substances;ATPase activity, coupled to transmembrane movement of substances;binding;catalytic activity;cation binding;cofactor transporter activity;efflux transmembrane transporter activity;heme binding;heme …	ABC_membrane;ABC_tran	3	3	3	9	9	9	77.434	0	16.056	42055000	25	NaN	21.2225	21.5297	NaN	NaN	NaN	22.0735	21.8616	-0.591371	1.06146
ATP-binding cassette sub-family B member 7, mitochondrial	ABCB7	B4DGL8;A0A087WW65;O75027-3;O75027;O75027-2	B4DGL8;A0A087WW65;O75027-3;O75027;O75027-2	active transmembrane transporter activity;adenyl nucleotide binding;adenyl ribonucleotide binding;ATP binding;ATPase activity;ATPase activity, coupled;ATPase activity, coupled to movement of substances;ATPase activity, coupled to transmembrane movement of substances;binding;catalytic activity;cofactor transporter activity;heme transporter activity;hydrolase activity;hydrolase activity, acting on …	ABC_membrane;ABC_tran	2	2	2	5	5	5	77.12	0	3.888	10517000	10	20.556	NaN	20.5459	19.7263	NaN	NaN	NaN	NaN	NaN	0
ATP-binding cassette sub-family D member 3	ABCD3	P28288;P28288-2;P28288-3	P28288;P28288-2	active transmembrane transporter activity;adenyl nucleotide binding;adenyl ribonucleotide binding;ATP binding;ATPase activity;ATPase activity, coupled;ATPase activity, coupled to movement of substances;ATPase activity, coupled to transmembrane movement of substances;binding;catalytic activity;hydrolase activity;hydrolase activity, acting on acid anhydrides;hydrolase activity, acting on acid anhyd…	ABC_membrane_2;ABC_tran	11	11	11	23.8	23.8	23.8	75.475	0	36.039	469450000	183	24.317	24.7631	24.6285	23.8892	24.7558	24.5506	24.8488	24.8385	-0.348981	0.850247
Mycophenolic acid acyl-glucuronide esterase, mitochondrial	ABHD10	Q9NUJ1-2;Q9NUJ1	Q9NUJ1-2;Q9NUJ1	catalytic activity;hydrolase activity;hydrolase activity, acting on glycosyl bonds;hydrolase activity, hydrolyzing O-glycosyl compounds	Abhydrolase_6	2	2	2	17.4	17.4	17.4	16.91	0	4.5637	10778000	7	NaN	19.6345	NaN	21.2258	20.191	NaN	NaN	NaN	0.239136	0
Tyrosine-protein kinase ABL1	ABL1	P00519-2;P00519;R4GRW0	P00519-2;P00519	actin binding;actin monomer binding;adenyl nucleotide binding;adenyl ribonucleotide binding;adenylyltransferase activity;ATP binding;binding;catalytic activity;cation binding;cytoskeletal protein binding;DNA binding;enzyme binding;ion binding;kinase activity;kinase binding;magnesium ion binding;manganese ion binding;metal ion binding;mitogen-activated protein kinase binding;nicotinate-nucleotide …	F_actin_bind;Pkinase_Tyr;SH2;SH3_1	27	20	20	35.8	29.4	29.4	124.95	0	61.27	370210000	120	24.6515	24.7824	24.7968	24.188	24.7589	24.713	24.6289	24.9528	-0.158749	0.450079
Abelson tyrosine-protein kinase 2	ABL2	P42684-6;P42684;P42684-2;P42684-3;P42684-7;P42684-5;P42684-4;P42684-10;P42684-8	P42684-6;P42684;P42684-2;P42684-3;P42684-7;P42684-5;P42684-4;P42684-10	actin binding;actin filament binding;actin monomer binding;adenyl nucleotide binding;adenyl ribonucleotide binding;ATP binding;binding;catalytic activity;cation binding;cytoskeletal protein binding;ion binding;kinase activity;magnesium ion binding;manganese ion binding;metal ion binding;non-membrane spanning protein tyrosine kinase activity;nucleotide binding;phosphotransferase activity, alcohol …	F_actin_bind;Pkinase_Tyr;SH2;SH3_1	34	34	27	46.4	46.4	40.1	126.22	0	183.39	1448800000	334	26.533	26.5767	26.9076	26.2038	26.7246	26.4813	26.3314	26.9238	-0.0599723	0.11446
Acyl-CoA dehydrogenase family member 10	ACAD10	Q6JQN1;F8W1I9;Q6JQN1-2;Q6JQN1-5;Q6JQN1-4;F8W0Q4;F8W179;D6RFF6;Q6JQN1-3	Q6JQN1;F8W1I9;Q6JQN1-2;Q6JQN1-5;Q6JQN1-4	acyl-CoA dehydrogenase activity;binding;catalytic activity;coenzyme binding;cofactor binding;flavin adenine dinucleotide binding;hydrolase activity;oxidoreductase activity;oxidoreductase activity, acting on the CH-CH group of donors;transferase activity;transferase activity, transferring phosphorus-containing groups	Acyl-CoA_dh_1;Acyl-CoA_dh_M;Acyl-CoA_dh_N;APH;HAD_2	35	34	34	34.7	33.6	33.6	118.83	0	208.8	4030100000	461	28.1795	28.2032	28.3017	27.7414	28.0707	27.9065	27.875	27.9465	0.156768	0.554613
	ACAD11	D6RDI8;F8WEV0	D6RDI8;F8WEV0	binding;catalytic activity;coenzyme binding;cofactor binding;flavin adenine dinucleotide binding;oxidoreductase activity;oxidoreductase activity, acting on the CH-CH group of donors;transferase activity;transferase activity, transferring phosphorus-containing groups	APH	24	1	1	69.7	7.4	7.4	53.729	0	14.373	382930000	73	24.3926	25.1563	24.5962	24.0664	24.5496	24.5232	24.8341	24.3899	-0.0213203	0.0296238
Acyl-CoA dehydrogenase family member 11	ACAD11	Q709F0;Q709F0-3;Q709F0-2;H0Y9C6	Q709F0;Q709F0-3;Q709F0-2	acyl-CoA dehydrogenase activity;binding;catalytic activity;coenzyme binding;cofactor binding;flavin adenine dinucleotide binding;long-chain-acyl-CoA dehydrogenase activity;medium-chain-acyl-CoA dehydrogenase activity;oxidoreductase activity;oxidoreductase activity, acting on the CH-CH group of donors;transferase activity;transferase activity, transferring phosphorus-containing groups;very long-ch…	Acyl-CoA_dh_1;Acyl-CoA_dh_M;Acyl-CoA_dh_N;APH	46	46	22	72.2	72.2	32.7	87.282	0	323.31	5041600000	878	28.1358	28.322	28.3631	27.7015	28.4239	28.2594	28.3844	28.3441	-0.222379	0.694062
Acyl-CoA dehydrogenase family member 9, mitochondrial	ACAD9	Q9H845;D6RCD8	Q9H845;D6RCD8	acyl-CoA dehydrogenase activity;binding;catalytic activity;coenzyme binding;cofactor binding;flavin adenine dinucleotide binding;oxidoreductase activity;oxidoreductase activity, acting on the CH-CH group of donors	Acyl-CoA_dh_1;Acyl-CoA_dh_M;Acyl-CoA_dh_N	4	4	4	12.2	12.2	12.2	68.76	0	15.928	58390000	32	NaN	21.7858	22.012	21.754	21.6924	21.487	22.0601	22.0148	0.0370051	0.075319
Short/branched chain specific acyl-CoA dehydrogenase, mitochondrial	ACADSB	P45954-2;P45954	P45954-2;P45954	acyl-CoA dehydrogenase activity;binding;catalytic activity;coenzyme binding;cofactor binding;flavin adenine dinucleotide binding;oxidoreductase activity;oxidoreductase activity, acting on the CH-CH group of donors	Acyl-CoA_dh_1;Acyl-CoA_dh_M;Acyl-CoA_dh_N	5	5	5	27.3	27.3	27.3	36.025	0	36.57	67605000	47	21.8781	21.9925	21.592	21.8998	22.404	22.1374	21.9273	22.287	-0.348362	1.38615
Acetyl-CoA acetyltransferase, mitochondrial	ACAT1	P24752;H0YEL7;E9PRQ6;P24752-2	P24752	acetyl-CoA C-acetyltransferase activity;acetyl-CoA C-acyltransferase activity;acetyltransferase activity;binding;C-acetyltransferase activity;C-acyltransferase activity;catalytic activity;cation binding;coenzyme binding;cofactor binding;ion binding;metal ion binding;transferase activity;transferase activity, transferring acyl groups;transferase activity, transferring acyl groups other than amino-…	Thiolase_C;Thiolase_N	6	6	6	21.3	21.3	21.3	45.199	0	24.518	28536000	20	21.9723	NaN	NaN	22.5855	21.3598	NaN	21.2294	NaN	0.984316	1.05459
ATP-citrate synthase	ACLY	P53396-2;P53396;P53396-3;K7ESG8;K7EIE7	P53396-2;P53396;P53396-3	acid-thiol ligase activity;adenyl nucleotide binding;adenyl ribonucleotide binding;ATP binding;ATP citrate synthase activity;binding;catalytic activity;cation binding;CoA-ligase activity;cofactor binding;ion binding;ligase activity;ligase activity, forming carbon-sulfur bonds;metal ion binding;nucleotide binding;purine nucleotide binding;purine ribonucleoside triphosphate binding;purine ribonucle…	ATP-grasp_2;Citrate_synt;CoA_binding;Ligase_CoA	15	15	15	21	21	21	119.77	0	28.904	239010000	88	23.9642	23.6028	23.4634	24.3659	23.9642	23.5124	23.9449	23.4382	0.1341	0.21868
Acyl-coenzyme A thioesterase 9, mitochondrial	ACOT9	Q9Y305-3;Q9Y305-2;Q9Y305;Q9Y305-4;C9J7L8;H7C5Q2	Q9Y305-3;Q9Y305-2;Q9Y305;Q9Y305-4	acetyl-CoA hydrolase activity;carboxylic ester hydrolase activity;catalytic activity;CoA hydrolase activity;hydrolase activity;hydrolase activity, acting on ester bonds;thiolester hydrolase activity	4HBT	5	5	5	19.5	19.5	19.5	43.206	0	5.5733	54262000	12	21.818	NaN	NaN	21.6184	NaN	NaN	21.8996	NaN	-0.181424	0
Long-chain-fatty-acid--CoA ligase 5	ACSL5	Q9ULC5;Q9ULC5-3;Q9ULC5-4	Q9ULC5;Q9ULC5-3;Q9ULC5-4	adenyl nucleotide binding;adenyl ribonucleotide binding;ATP binding;binding;catalytic activity;fatty acid ligase activity;ligase activity;ligase activity, forming carbon-sulfur bonds;long-chain fatty acid-CoA ligase activity;nucleotide binding;purine nucleotide binding;purine ribonucleoside triphosphate binding;purine ribonucleotide binding;ribonucleotide binding	AMP-binding	5	5	5	11.6	11.6	11.6	75.99	0	16.304	48738000	30	21.2368	NaN	21.9674	22.1578	NaN	21.7309	21.8772	NaN	-0.0167236	0.0148123
Actin, cytoplasmic 1;Actin, cytoplasmic 1, N-terminally processed	ACTB	P60709;E7EVS6;G5E9R0;P63267-2;C9JZR7;C9JTX5;C9JUM1;Q6S8J3;A5A3E0;P0CG38;F8WCH0;Q9BYX7;P0CG39	P60709	adenyl nucleotide binding;adenyl ribonucleotide binding;ATP binding;binding;cytoskeletal protein binding;enzyme binding;identical protein binding;kinesin binding;nitric-oxide synthase binding;nucleotide binding;protein binding;purine nucleotide binding;purine ribonucleoside triphosphate binding;purine ribonucleotide binding;ribonucleotide binding;structural constituent of cytoskeleton;structural …	Actin;Ank;Ank_2	34	34	1	89.6	89.6	4.5	41.736	0	323.31	5234300000	785	28.3279	27.7408	27.9239	29.1165	27.9187	28.2579	28.1022	27.8463	0.246021	0.327781
Actin, alpha cardiac muscle 1;Actin, gamma-enteric smooth muscle;Actin, aortic smooth muscle;Actin, alpha skeletal muscle	ACTC1;ACTG2;ACTA2;ACTA1	P68032;P63267;P62736;P68133;A6NL76;F8WB63;B8ZZJ2;C9JFL5;F6UVQ4;F6QUT6	P68032;P63267;P62736;P68133;A6NL76;F8WB63;B8ZZJ2;C9JFL5;F6UVQ4;F6QUT6	adenyl nucleotide binding;adenyl ribonucleotide binding;ADP binding;ATP binding;ATPase activity;binding;catalytic activity;cytoskeletal protein binding;enzyme binding;hydrolase activity;hydrolase activity, acting on acid anhydrides;hydrolase activity, acting on acid anhydrides, in phosphorus-containing anhydrides;kinase binding;myosin binding;nucleoside-triphosphatase activity;nucleotide binding;…	Actin	20	3	3	40.8	6.1	6.1	42.019	0	12.511	733430000	80	25.6233	24.7202	24.5314	26.2863	24.8607	25.6031	25.6514	24.8986	0.0368581	0.0273123
Alpha-actinin-4	ACTN4	O43707;O43707-2;F5GXS2;O43707-3;H7C144;H9KV75;P12814-2;P12814;P12814-3;P12814-4;H0YJ11;H0YJW3;H7C5W8;K7EP19;K7EJH8;G3V2W4	O43707;O43707-2;F5GXS2;O43707-3;H7C144	actin binding;actin filament binding;binding;calcium ion binding;cation binding;cytoskeletal protein binding;double-stranded RNA binding;hormone receptor binding;identical protein binding;integrin binding;ion binding;ion channel binding;ligand-dependent nuclear receptor transcription coactivator activity;metal ion binding;nuclear hormone receptor binding;nucleic acid binding;nucleoside binding;pr…	CH;EF-hand_6;EFhand_Ca_insen;Spectrin	8	8	8	12.8	12.8	12.8	104.85	0	12.913	26831000	11	21.9161	NaN	NaN	23.078	NaN	NaN	NaN	NaN	NaN	0
Activin receptor type-1	ACVR1	Q04771;C9JHJ7	Q04771	activin binding;activin receptor activity, type I;activin-activated receptor activity;adenyl nucleotide binding;adenyl ribonucleotide binding;ATP binding;binding;catalytic activity;cation binding;cytokine binding;growth factor binding;hormone binding;identical protein binding;ion binding;kinase activity;metal ion binding;molecular transducer activity;nucleotide binding;peptide binding;peptide hor…	Activin_recp;Pkinase;TGF_beta_GS	13	13	13	30.1	30.1	30.1	57.152	0	31.229	477910000	68	25.1909	24.9787	25.1086	24.6196	25.2408	24.7473	24.9125	25.0828	-0.0214119	0.0452527
Activin receptor type-1B	ACVR1B	P36896-5;P36896;P36896-4;P36896-2;P36896-3	P36896-5;P36896;P36896-4;P36896-2;P36896-3	activin receptor activity, type I;activin-activated receptor activity;adenyl nucleotide binding;adenyl ribonucleotide binding;ATP binding;binding;catalytic activity;cation binding;enzyme binding;inhibin binding;ion binding;kinase activity;metal ion binding;molecular transducer activity;nucleotide binding;phosphotransferase activity, alcohol group as acceptor;protein binding;protein kinase activit…	Activin_recp;Pkinase;TGF_beta_GS	9	7	7	22.1	15.9	15.9	51.724	0	61.303	159050000	30	23.7216	23.9781	23.6823	23.6743	23.7414	23.7409	23.5086	NaN	0.100454	0.407266
Atypical kinase ADCK3, mitochondrial	ADCK3	Q8NI60-3;Q8NI60;Q8NI60-2;Q8NI60-4	Q8NI60-3;Q8NI60	adenyl nucleotide binding;adenyl ribonucleotide binding;ADP binding;ATP binding;binding;catalytic activity;kinase activity;nucleotide binding;purine nucleotide binding;purine ribonucleoside triphosphate binding;purine ribonucleotide binding;ribonucleotide binding;transferase activity;transferase activity, transferring phosphorus-containing groups	ABC1	5	5	5	11.1	11.1	11.1	66.626	0	13.133	64891000	23	22.3303	NaN	21.7299	NaN	22.0133	NaN	22.4393	21.9351	-0.0991271	0.11689
Acylglycerol kinase, mitochondrial	AGK	Q53H12;E9PC15;E9PG39;A0A0G2JLG5;A0A0G2JLD0;F8WDD1;Q53H12-2	Q53H12;E9PC15;E9PG39	acylglycerol kinase activity;adenyl nucleotide binding;adenyl ribonucleotide binding;ATP binding;binding;catalytic activity;ceramide kinase activity;diacylglycerol kinase activity;kinase activity;lipid kinase activity;NAD+ kinase activity;nucleotide binding;phosphotransferase activity, alcohol group as acceptor;purine nucleotide binding;purine ribonucleoside triphosphate binding;purine ribonucleo…	DAGK_cat	13	13	13	48.6	48.6	48.6	47.137	0	59.174	466510000	145	24.6515	24.689	24.6858	24.4404	24.9258	24.4801	24.7739	24.8312	-0.136076	0.562561
Adenosylhomocysteinase	AHCY	P23526;P23526-2	P23526;P23526-2	adenosylhomocysteinase activity;catalytic activity;hydrolase activity;hydrolase activity, acting on ether bonds;trialkylsulfonium hydrolase activity	AdoHcyase;AdoHcyase_NAD	7	7	7	23.4	23.4	23.4	47.716	0	8.4212	91962000	32	22.8746	22.0626	22.1313	23.5006	22.2082	22.0442	22.5427	21.8877	0.471551	0.607001
Apoptosis-inducing factor 1, mitochondrial	AIFM1	O95831-3;O95831;O95831-6;O95831-4;O95831-2;E9PMA0;O95831-5	O95831-3;O95831;O95831-6;O95831-4	binding;catalytic activity;coenzyme binding;cofactor binding;DNA binding;electron carrier activity;FAD binding;flavin adenine dinucleotide binding;NAD(P)H oxidase activity;nucleic acid binding;oxidoreductase activity;oxidoreductase activity, acting on NADH or NADPH;oxidoreductase activity, acting on NADH or NADPH, oxygen as acceptor	AIF_C;Pyr_redox;Pyr_redox_2	11	11	11	25.3	25.3	25.3	66.294	0	27.652	296160000	95	24.2565	23.884	23.9208	24.2427	24.0763	23.9584	24.0376	24.0761	0.0389256	0.141541
Aminoacyl tRNA synthase complex-interacting multifunctional protein 1;Endothelial monocyte-activating polypeptide 2	AIMP1	Q12904;Q12904-2;D6R937	Q12904;Q12904-2	binding;cytokine activity;enzyme binding;GTPase binding;identical protein binding;nucleic acid binding;protein binding;protein dimerization activity;protein homodimerization activity;receptor binding;RNA binding;tRNA binding	tRNA_bind	3	3	3	13.5	13.5	13.5	34.352	0	5.6641	42433000	15	NaN	21.9162	NaN	21.8555	22.5502	NaN	21.5913	21.7703	-0.084746	0.0766811
Aminoacyl tRNA synthase complex-interacting multifunctional protein 2	AIMP2	A8MU58;Q13155;F8W950	A8MU58;Q13155;F8W950		GST_C_3	6	6	6	44.6	44.6	44.6	26.76	0	11.938	58985000	35	21.8766	22.019	NaN	21.7964	21.7474	21.6882	22.2954	22.1464	-0.0720382	0.147468
Adenylate kinase isoenzyme 1	AK1	Q5T9B7;P00568;H0YID2;H0Y4J6	Q5T9B7;P00568;H0YID2;H0Y4J6	adenyl nucleotide binding;adenyl ribonucleotide binding;adenylate kinase activity;ATP binding;binding;catalytic activity;kinase activity;nucleobase-containing compound kinase activity;nucleoside diphosphate kinase activity;nucleotide binding;nucleotide kinase activity;phosphotransferase activity, phosphate group as acceptor;purine nucleotide binding;purine ribonucleoside triphosphate binding;puri…		2	2	2	14.8	14.8	14.8	23.411	0	5.4384	4925100	3	20.1225	NaN	NaN	20.884	NaN	NaN	NaN	NaN	NaN	0
Adenylate kinase 2, mitochondrial;Adenylate kinase 2, mitochondrial;Adenylate kinase 2, mitochondrial, N-terminally processed	AK2	F8W1A4;P54819-2;P54819;P54819-6;P54819-5;F8VZG5;F8VY04;P54819-3;P54819-4;G3V213	F8W1A4;P54819-2;P54819;P54819-6;P54819-5;F8VZG5;F8VY04;P54819-3;P54819-4	adenyl nucleotide binding;adenyl ribonucleotide binding;adenylate kinase activity;ATP binding;binding;catalytic activity;kinase activity;nucleobase-containing compound kinase activity;nucleotide binding;nucleotide kinase activity;phosphotransferase activity, phosphate group as acceptor;purine nucleotide binding;purine ribonucleoside triphosphate binding;purine ribonucleotide binding;ribonucleotid…	ADK_lid	6	6	6	36.6	36.6	36.6	25.63	0	15.229	55389000	11	22.2236	21.3885	21.8898	23.6488	21.3796	NaN	NaN	21.6772	0.759299	0.444984
A-kinase anchor protein 12	AKAP12	Q02952-3;Q02952-2;Q02952	Q02952-3;Q02952-2;Q02952	adenylate cyclase binding;binding;enzyme binding;protein binding;protein kinase A binding	RII_binding_1;WSK	14	14	14	15.4	15.4	15.4	180.99	0	31.041	92234000	29	23.1962	NaN	NaN	23.6267	NaN	NaN	NaN	22.9735	0.437955	0
Aldose reductase	AKR1B1	P15121;E9PCX2;E9PEF9	P15121;E9PCX2	alcohol dehydrogenase (NADP+) activity;alditol:NADP+ 1-oxidoreductase activity;aldo-keto reductase (NADP) activity;catalytic activity;electron carrier activity;glyceraldehyde oxidoreductase activity;oxidoreductase activity;oxidoreductase activity, acting on CH-OH group of donors;oxidoreductase activity, acting on the aldehyde or oxo group of donors;oxidoreductase activity, acting on the CH-OH gro…	Aldo_ket_red	5	5	5	35.4	35.4	35.4	35.853	0	10.605	42752000	13	22.4194	NaN	NaN	23.6656	NaN	NaN	22.0046	NaN	1.03792	0
RAC-alpha serine/threonine-protein kinase	AKT1	P31749-2;P31749;A0A087WY56;G3V3X1;G3V2I6;G3V3K5	P31749-2;P31749;A0A087WY56;G3V3X1;G3V2I6	14-3-3 protein binding;adenyl nucleotide binding;adenyl ribonucleotide binding;ATP binding;binding;catalytic activity;enzyme binding;enzyme regulator activity;identical protein binding;kinase activity;lipid binding;nitric-oxide synthase regulator activity;nucleotide binding;phosphatidylinositol binding;phosphatidylinositol-3,4,5-trisphosphate binding;phosphatidylinositol-3,4-bisphosphate binding;…	PH;Pkinase;Pkinase_C	6	4	4	23.4	15.1	15.1	48.346	0	10.068	73810000	27	22.4054	22.8118	22.1504	22.3364	21.3259	NaN	22.4727	NaN	0.526704	0.573512
RAC-beta serine/threonine-protein kinase	AKT2	P31751;M0R0P9;P31751-2;J3QKW1;J3QL45;M0QZW8;M0R283;C9JIJ1;A0A0A0MRF1;M0R275;J3KRI8;A8MX96;E7EVP8;M0QZK3;J3QLS6;C9JHS6;Q9Y243-2;Q9Y243	P31751;M0R0P9;P31751-2;J3QKW1	adenyl nucleotide binding;adenyl ribonucleotide binding;ATP binding;binding;catalytic activity;kinase activity;nucleotide binding;phosphotransferase activity, alcohol group as acceptor;protein kinase activity;protein serine/threonine kinase activity;purine nucleotide binding;purine ribonucleoside triphosphate binding;purine ribonucleotide binding;ribonucleotide binding;transferase activity;transf…	PH;Pkinase;Pkinase_C	9	9	7	26.4	26.4	19.1	55.768	0	17.807	119210000	60	22.8324	22.8425	22.8605	22.3459	22.456	22.4164	22.5307	22.798	0.170076	0.515899
Aldehyde dehydrogenase family 1 member A3	ALDH1A3	P47895;H0Y2X5;H0YKF9;H0YNQ3	P47895;H0Y2X5	aldehyde dehydrogenase (NAD) activity;aldehyde dehydrogenase [NAD(P)+] activity;binding;catalytic activity;coenzyme binding;cofactor binding;hormone binding;identical protein binding;NAD binding;NAD+ binding;nucleotide binding;oxidoreductase activity;oxidoreductase activity, acting on the aldehyde or oxo group of donors;oxidoreductase activity, acting on the aldehyde or oxo group of donors, NAD o…	Aldedh	17	17	16	48.2	48.2	48.2	56.108	0	92.054	639070000	188	25.1384	25.1125	25.2645	24.9626	25.2266	25.1719	25.1945	25.3044	-0.104869	0.754402
Aldehyde dehydrogenase X, mitochondrial	ALDH1B1	P30837	P30837	aldehyde dehydrogenase (NAD) activity;catalytic activity;oxidoreductase activity;oxidoreductase activity, acting on the aldehyde or oxo group of donors;oxidoreductase activity, acting on the aldehyde or oxo group of donors, NAD or NADP as acceptor	Aldedh	21	21	21	53.2	53.2	53.2	57.206	0	109.67	1221200000	295	26.0338	26.1074	26.0995	26.0414	26.1991	26.2265	26.2534	26.2548	-0.162938	3.37893
Aldehyde dehydrogenase, mitochondrial	ALDH2	P05091;P05091-2;F8VP50;S4R3S4	P05091;P05091-2	aldehyde dehydrogenase (NAD) activity;aldehyde dehydrogenase [NAD(P)+] activity;catalytic activity;electron carrier activity;oxidoreductase activity;oxidoreductase activity, acting on the aldehyde or oxo group of donors;oxidoreductase activity, acting on the aldehyde or oxo group of donors, NAD or NADP as acceptor	Aldedh	15	15	15	51.5	51.5	51.5	56.381	0	81.187	446030000	160	24.5098	24.6585	24.7814	24.4459	24.7977	24.6883	24.7982	24.8715	-0.190038	1.18635
4-trimethylaminobutyraldehyde dehydrogenase	ALDH9A1	P49189;P49189-2	P49189;P49189-2	1-pyrroline dehydrogenase activity;3-chloroallyl aldehyde dehydrogenase activity;4-trimethylammoniobutyraldehyde dehydrogenase activity;aldehyde dehydrogenase (NAD) activity;amine binding;aminobutyraldehyde dehydrogenase activity;binding;catalytic activity;coenzyme binding;cofactor binding;NAD binding;nucleotide binding;oxidoreductase activity;oxidoreductase activity, acting on the aldehyde or ox…	Aldedh	2	2	2	4.9	4.9	4.9	53.801	0.00077042	2.273	4763400	2	NaN	NaN	19.8466	20.882	NaN	NaN	NaN	NaN	NaN	0
Fructose-bisphosphate aldolase;Fructose-bisphosphate aldolase A	ALDOA	J3KPS3;P04075;P04075-2;H3BQN4;H3BUH7;H3BPS8;H3BR04;H3BR68;H3BMQ8;H3BU78;A0A087WXX2;P05062	J3KPS3;P04075;P04075-2;H3BQN4	actin binding;aldehyde-lyase activity;ATPase binding;binding;carbohydrate binding;carbon-carbon lyase activity;catalytic activity;cytoskeletal protein binding;enzyme binding;fructose binding;fructose-bisphosphate aldolase activity;identical protein binding;lyase activity;monosaccharide binding;protein binding;sugar binding;tubulin binding	Glycolytic	19	19	18	67.4	67.4	65.5	39.817	0	121.65	786170000	100	25.9259	24.7067	24.8406	27.1369	25.3222	23.8907	25.3717	24.8015	0.806004	0.570684
THO complex subunit 4	ALYREF	Q86V81;E9PB61	Q86V81;E9PB61	binding;nucleic acid binding;nucleotide binding	FoP_duplication;RRM_1	9	9	9	42.4	42.4	42.4	26.888	0	113.2	746620000	174	24.0854	27.0616	25.4201	24.8923	24.9486	25.0596	25.1	25.1082	0.310738	0.194344
Acidic leucine-rich nuclear phosphoprotein 32 family member A	ANP32A	H0YN26;P39687;H7BZ09	H0YN26;P39687			3	3	3	40.1	40.1	40.1	19.997	0	10.039	61416000	10	23.1368	NaN	NaN	23.805	22.9274	NaN	NaN	NaN	0.543508	0
Annexin A1;Annexin	ANXA1	P04083;Q5T3N1;Q5T3N0	P04083;Q5T3N1	ATPase activity;ATPase activity, coupled;binding;binding, bridging;calcium ion binding;calcium-dependent phospholipid binding;calcium-dependent protein binding;catalytic activity;cation binding;DNA binding;DNA-dependent ATPase activity;double-stranded DNA-dependent ATPase activity;enzyme inhibitor activity;enzyme regulator activity;helicase activity;hydrolase activity;hydrolase activity, acting o…	Annexin	15	15	15	51.2	51.2	51.2	38.714	0	27.242	149930000	42	23.6773	20.6048	21.9113	25.9947	21.9744	20.6708	22.2173	21.5834	1.43555	0.549412
Annexin A2;Annexin;Putative annexin A2-like protein	ANXA2;ANXA2P2	P07355;P07355-2;H0YN42;H0YMD0;H0YMU9;A6NMY6;H0YKS4;H0YM50;H0YMM1;H0YNP5;H0YKZ7;H0YLV6;H0YMT9;H0YKX9;H0YN28;H0YL33;H0YMW4;H0YKL9;H0YNA0;H0YKV8;H0YN52;H0YMD9;H0YLE2;H0YNB8;H0YKN4	P07355;P07355-2;H0YN42;H0YMD0;H0YMU9;A6NMY6;H0YKS4;H0YM50;H0YMM1;H0YNP5	binding;calcium ion binding;calcium-dependent phospholipid binding;calcium-dependent protein binding;cation binding;enzyme inhibitor activity;enzyme regulator activity;ion binding;lipase inhibitor activity;lipid binding;metal ion binding;phosphatidylinositol binding;phosphatidylinositol-4,5-bisphosphate binding;phospholipase A2 inhibitor activity;phospholipase inhibitor activity;phospholipid bind…	Annexin	26	26	26	75.8	75.8	75.8	38.604	0	93.158	1438900000	341	26.5831	26.2236	26.2262	27.266	26.2359	26.1128	26.1861	26.0411	0.430749	0.871438
Annexin A5;Annexin	ANXA5	P08758;D6RBL5;E9PHT9;D6RBE9	P08758;D6RBL5;E9PHT9	binding;calcium ion binding;calcium-dependent phospholipid binding;cation binding;enzyme inhibitor activity;enzyme regulator activity;ion binding;lipase inhibitor activity;lipid binding;metal ion binding;phospholipase inhibitor activity;phospholipid binding	Annexin	11	11	11	60.6	60.6	60.6	35.936	0	60.117	48061000	20	22.1528	NaN	21.0303	24.2714	21.4212	NaN	NaN	20.82	1.36425	0.451077
AP-2 complex subunit alpha-1	AP2A1	O95782-2;O95782;E9PR62;M0R2D9	O95782-2;O95782	binding;enzyme binding;kinase binding;protein binding;protein kinase binding;protein transporter activity;substrate-specific transporter activity;transporter activity	Adaptin_N;Alpha_adaptin_C;Alpha_adaptinC2	20	20	15	32.8	32.8	25.3	105.36	0	160.84	946520000	244	26.0824	26.0092	26.2685	26.304	25.5921	26.2083	25.8749	25.5119	0.369227	1.11403
AP-2 complex subunit alpha-2	AP2A2	O94973;O94973-2;A0A0G2JS82;O94973-3;A0A0G2JQM1	O94973;O94973-2;A0A0G2JS82;O94973-3	binding;enzyme binding;kinase binding;lipid binding;protein binding;protein kinase binding;protein transporter activity;substrate-specific transporter activity;transporter activity	Adaptin_N;Alpha_adaptin_C;Alpha_adaptinC2	14	9	9	22.7	15.1	15.1	103.96	0	14.28	121380000	30	23.5804	23.041	23.1376	23.0776	23.1161	23.0622	NaN	22.3339	0.37177	0.679736
AP-2 complex subunit beta	AP2B1	P63010;P63010-2;A0A087X253;P63010-3;A0A087WU93;A0A087WZQ6;K7EN71;K7ERB2;A0A087WYD1;K7EJX1;Q10567-4;Q10567-3;Q10567-2;Q10567;A0A087WXS3;K7EKZ5;C9J1E7	P63010;P63010-2;A0A087X253;P63010-3	binding;clathrin binding;enzyme binding;kinase binding;peptide binding;protein binding;protein kinase binding;protein transporter activity;signal sequence binding;substrate-specific transporter activity;transporter activity	Adaptin_N;Alpha_adaptinC2;B2-adapt-app_C	23	23	23	31.3	31.3	31.3	104.55	0	68.654	683690000	164	25.7113	25.5323	25.747	25.0763	25.4554	25.3648	25.0857	25.3489	0.203036	0.543373
AP-2 complex subunit mu	AP2M1	A0A087WY71;E9PFW3;Q96CW1-2;Q96CW1;C9JJ47;H7C4C3;C9JTK4;C9JGT8;C9JJD3;C9JPV8	A0A087WY71;E9PFW3;Q96CW1-2;Q96CW1	binding;lipid binding;lipoprotein particle receptor binding;low-density lipoprotein particle receptor binding;peptide binding;protein binding;receptor binding;signal sequence binding;transporter activity	Adap_comp_sub;Clat_adaptor_s	22	22	22	53.2	53.2	53.2	49.526	0	96.912	899050000	289	25.917	26.0257	25.9743	25.9914	25.7064	25.6169	25.7772	25.6777	0.282507	3.37769
AP-2 complex subunit sigma	AP2S1	M0R0N4;X6R390;M0QYZ2;P53680-2;P53680;M0R1S0;M0QZ21	M0R0N4;X6R390;M0QYZ2;P53680-2;P53680	protein transporter activity;substrate-specific transporter activity;transporter activity	Clat_adaptor_s	3	3	3	18.1	18.1	18.1	17.303	0.0037037	2.02	66718000	9	22.2927	22.1748	22.314	22.2305	22.3951	21.0124	21.779	NaN	0.524181	0.744134
Adenine phosphoribosyltransferase	APRT	P07741;H3BQF1;H3BQZ9;H3BQB1;P07741-2	P07741;H3BQF1;H3BQZ9;H3BQB1;P07741-2	adenine binding;adenine phosphoribosyltransferase activity;adenyl nucleotide binding;adenyl ribonucleotide binding;AMP binding;binding;catalytic activity;nucleobase binding;nucleotide binding;purine base binding;purine nucleotide binding;purine ribonucleotide binding;ribonucleotide binding;transferase activity;transferase activity, transferring glycosyl groups;transferase activity, transferring p…	Pribosyltran	4	4	4	36.1	36.1	36.1	19.608	0	20.495	48097000	16	22.3989	20.9792	21.2992	22.5475	21.5619	NaN	NaN	21.454	0.298216	0.194465
Rho GDP-dissociation inhibitor 1	ARHGDIA	J3KTF8;J3QQX2;J3KRY1;P52565-2;P52565;J3KS60;J3KRE2	J3KTF8;J3QQX2;J3KRY1;P52565-2;P52565;J3KS60;J3KRE2	enzyme activator activity;enzyme regulator activity;GDP-dissociation inhibitor activity;GTPase activator activity;GTPase regulator activity;nucleoside-triphosphatase regulator activity;Rho GDP-dissociation inhibitor activity;small GTPase regulator activity	Rho_GDI	3	3	3	46.4	46.4	46.4	21.614	0	32.809	84260000	26	22.973	NaN	NaN	24.2218	NaN	NaN	NaN	22.2515	1.34583	0
ADP-ribosylation factor-like protein 1	ARL1	F8W1Z8;B4DZG7;P40616-2;P40616	F8W1Z8;B4DZG7;P40616-2;P40616	binding;catalytic activity;cation binding;enzyme activator activity;enzyme regulator activity;GTP binding;GTPase activity;guanyl nucleotide binding;guanyl ribonucleotide binding;hydrolase activity;hydrolase activity, acting on acid anhydrides;hydrolase activity, acting on acid anhydrides, in phosphorus-containing anhydrides;ion binding;metal ion binding;nucleoside-triphosphatase activity;nucleoti…	Arf	2	2	2	40.4	40.4	40.4	5.8457	0	7.7945	33148000	37	20.7369	20.836	20.7975	NaN	21.4403	20.4947	21.5735	21.6299	-0.494467	0.748633
Asparagine synthetase [glutamine-hydrolyzing]	ASNS	P08243-2;P08243;P08243-3;F8WEJ5;C9JT45;C9J057;C9JLN6;C9JM09	P08243-2;P08243;P08243-3;F8WEJ5	adenyl nucleotide binding;adenyl ribonucleotide binding;asparagine synthase (glutamine-hydrolyzing) activity;ATP binding;binding;carbon-nitrogen ligase activity, with glutamine as amido-N-donor;catalytic activity;cofactor binding;ligase activity;ligase activity, forming carbon-nitrogen bonds;nucleotide binding;purine nucleotide binding;purine ribonucleoside triphosphate binding;purine ribonucleot…	Asn_synthase;GATase_7	10	10	10	35.4	35.4	35.4	62.168	0	20.164	65653000	45	22.3042	21.8917	21.5403	22.7087	22.5296	21.7592	22.1328	22.0171	0.00153446	0.00170643
ATPase family AAA domain-containing protein 3A	ATAD3A	Q9NVI7-2;H0Y2W2;Q9NVI7;Q9NVI7-3;Q5SV16	Q9NVI7-2;H0Y2W2;Q9NVI7;Q9NVI7-3	adenyl nucleotide binding;adenyl ribonucleotide binding;ATP binding;binding;nucleotide binding;purine nucleotide binding;purine ribonucleoside triphosphate binding;purine ribonucleotide binding;ribonucleotide binding	AAA;DUF3523	28	28	9	52.9	52.9	20.3	66.217	0	98.573	1038300000	296	25.8031	25.7676	25.7978	25.8129	25.9438	25.7877	26.1423	25.9373	-0.157452	1.12156
ATPase family AAA domain-containing protein 3B	ATAD3B	Q5T9A4;Q5T9A4-3;Q5T9A4-2	Q5T9A4;Q5T9A4-3	adenyl nucleotide binding;adenyl ribonucleotide binding;ATP binding;binding;nucleotide binding;purine nucleotide binding;purine ribonucleoside triphosphate binding;purine ribonucleotide binding;ribonucleotide binding	AAA;DUF3523	18	4	3	33.6	12	8.6	72.572	0	21.982	67669000	26	22.118	NaN	21.5898	21.786	22.5152	NaN	21.9381	22.5651	-0.508206	0.937572
Sodium/potassium-transporting ATPase subunit alpha-1;Sodium/potassium-transporting ATPase subunit alpha-3	ATP1A1;ATP1A3	P05023-3;P05023-4;P05023;M0R116;A0A0A0MT26;P05023-2;P13637;P13637-2;P13637-3;H0Y7C1;B1AKY9;P50993;Q13733;P54707;P54707-2;P20648	P05023-3;P05023-4;P05023;M0R116;A0A0A0MT26;P05023-2;P13637;P13637-2;P13637-3	active transmembrane transporter activity;adenyl nucleotide binding;adenyl ribonucleotide binding;ADP binding;alkali metal ion binding;ATP binding;ATPase activity;ATPase activity, coupled;ATPase activity, coupled to movement of substances;ATPase activity, coupled to transmembrane movement of ions;ATPase activity, coupled to transmembrane movement of ions, phosphorylative mechanism;ATPase activity…	Cation_ATPase_C;Cation_ATPase_N;E1-E2_ATPase;H-K_ATPase_N;Hydrolase	10	10	10	15.5	15.5	15.5	109.55	0	27.133	153520000	57	23.1548	23.1374	23.2087	23.6885	23.2588	22.999	23.3393	23.1723	0.10498	0.291874
Sarcoplasmic/endoplasmic reticulum calcium ATPase 2	ATP2A2	P16615-5;P16615-2;P16615-3;P16615;P16615-4;H7C5W9;Q93084-4;Q93084-2;Q93084-3;Q93084-7;Q93084;Q93084-6;Q93084-5;O14983-3;O14983-2;O14983;J3QSY6;H3BTW4	P16615-5;P16615-2;P16615-3;P16615;P16615-4;H7C5W9	active transmembrane transporter activity;adenyl nucleotide binding;adenyl ribonucleotide binding;ATP binding;ATPase activity;ATPase activity, coupled;ATPase activity, coupled to movement of substances;ATPase activity, coupled to transmembrane movement of ions;ATPase activity, coupled to transmembrane movement of ions, phosphorylative mechanism;ATPase activity, coupled to transmembrane movement o…	Cation_ATPase_C;Cation_ATPase_N;E1-E2_ATPase;Hydrolase	26	26	26	30.2	30.2	30.2	109.73	0	156.6	1083900000	242	25.6957	25.9446	25.7019	25.6989	26.2258	25.9505	26.1528	26.1008	-0.347184	2.19609
ATP synthase subunit alpha, mitochondrial	ATP5A1	P25705;P25705-2;P25705-3;K7EK77;K7ERX7;K7ENJ4;K7EJP1;K7EQH4;K7ESA0	P25705;P25705-2;P25705-3	active transmembrane transporter activity;adenyl nucleotide binding;adenyl ribonucleotide binding;ATP binding;ATPase activity;ATPase activity, coupled;ATPase activity, coupled to movement of substances;ATPase activity, coupled to transmembrane movement of ions;ATPase activity, coupled to transmembrane movement of substances;binding;catalytic activity;cation transmembrane transporter activity;cati…	ATP-synt_ab;ATP-synt_ab_C;ATP-synt_ab_N	90	90	90	81.7	81.7	81.7	59.75	0	323.31	128910000000	4948	32.5204	33.0801	32.9176	32.4293	33.003	32.6146	32.8341	32.9182	-0.105598	0.242361
ATP synthase subunit beta, mitochondrial;ATP synthase subunit beta	ATP5B	P06576;H0YH81;F8W079;H0YI37	P06576;H0YH81	active transmembrane transporter activity;adenyl nucleotide binding;adenyl ribonucleotide binding;ATP binding;ATPase activity;ATPase activity, coupled;ATPase activity, coupled to movement of substances;ATPase activity, coupled to transmembrane movement of ions;ATPase activity, coupled to transmembrane movement of substances;binding;catalytic activity;cation transmembrane transporter activity;cati…	ATP-synt_ab;ATP-synt_ab_C;ATP-synt_ab_N	76	76	51	89.6	89.6	60.1	56.559	0	323.31	229820000000	6185	33.3855	33.6773	33.6307	33.0427	33.8522	33.3514	33.6476	33.637	-0.187994	0.479232
	ATP5B	F8W0P7	F8W0P7	adenyl nucleotide binding;adenyl ribonucleotide binding;ATP binding;binding;nucleotide binding;purine nucleotide binding;purine ribonucleoside triphosphate binding;purine ribonucleotide binding;ribonucleotide binding	ATP-synt_ab;ATP-synt_ab_N	27	2	2	72.6	7	7	28.392	0.00084746	3.1053	56680000	16	NaN	22.0607	21.8861	NaN	NaN	22.0302	22.213	21.7987	-0.0405823	0.0837757
ATP synthase subunit gamma, mitochondrial	ATP5C1	P36542	P36542	active transmembrane transporter activity;ATPase activity;ATPase activity, coupled;ATPase activity, coupled to movement of substances;ATPase activity, coupled to transmembrane movement of ions;ATPase activity, coupled to transmembrane movement of substances;catalytic activity;cation transmembrane transporter activity;cation-transporting ATPase activity;hydrogen ion transmembrane transporter activ…	ATP-synt	35	35	2	62.4	62.4	6.4	32.996	0	315.15	22338000000	1304	30.0454	30.5421	30.3325	29.8588	30.5743	30.0054	30.368	30.3713	-0.135046	0.293747
ATP synthase subunit delta, mitochondrial	ATP5D	P30049	P30049	active transmembrane transporter activity;ATPase activity;ATPase activity, coupled;ATPase activity, coupled to movement of substances;ATPase activity, coupled to transmembrane movement of ions;ATPase activity, coupled to transmembrane movement of substances;catalytic activity;cation transmembrane transporter activity;cation-transporting ATPase activity;hydrogen ion transmembrane transporter activ…	ATP-synt_DE_N	8	8	8	41.1	41.1	41.1	17.49	0	142.03	6884800000	762	28.2398	28.5907	28.6404	28.034	28.649	28.3039	28.6039	28.4305	-0.120621	0.307146
ATP synthase subunit epsilon, mitochondrial	ATP5E	P56381;Q5VTU8	P56381	active transmembrane transporter activity;ATPase activity;ATPase activity, coupled;ATPase activity, coupled to movement of substances;ATPase activity, coupled to transmembrane movement of ions;ATPase activity, coupled to transmembrane movement of substances;catalytic activity;cation transmembrane transporter activity;cation-transporting ATPase activity;hydrogen ion transmembrane transporter activ…	ATP-synt_Eps	5	5	5	74.5	74.5	74.5	5.7797	0	9.2653	2836900000	60	27.0471	27.0214	27.4595	26.863	27.8015	27.129	27.5358	27.6455	-0.430192	1.1787
ATP synthase F(0) complex subunit B1, mitochondrial	ATP5F1	P24539;Q5QNZ2	P24539;Q5QNZ2	cation transmembrane transporter activity;hydrogen ion transmembrane transporter activity;inorganic cation transmembrane transporter activity;ion transmembrane transporter activity;monovalent inorganic cation transmembrane transporter activity;substrate-specific transmembrane transporter activity;substrate-specific transporter activity;transmembrane transporter activity;transporter activity	Mt_ATP-synt_B	27	27	27	68.8	68.8	68.8	28.908	0	323.31	13669000000	711	29.2513	29.7244	29.6787	28.8932	29.8546	29.3222	29.8149	29.7921	-0.309034	0.63386
ATP synthase subunit d, mitochondrial	ATP5H	O75947;O75947-2;F5H608	O75947;O75947-2	cation transmembrane transporter activity;hydrogen ion transmembrane transporter activity;inorganic cation transmembrane transporter activity;ion transmembrane transporter activity;monovalent inorganic cation transmembrane transporter activity;substrate-specific transmembrane transporter activity;substrate-specific transporter activity;transmembrane transporter activity;transporter activity	Mt_ATP-synt_D	22	22	22	83.2	83.2	83.2	18.491	0	227.39	16962000000	658	29.6346	30.1075	30.0206	29.3981	30.2421	29.6604	29.8596	30.1314	-0.183152	0.375712
ATP synthase-coupling factor 6, mitochondrial	ATP5J	P18859;P18859-2;A8MUH2	P18859;P18859-2;A8MUH2	cation transmembrane transporter activity;hydrogen ion transmembrane transporter activity;inorganic cation transmembrane transporter activity;ion transmembrane transporter activity;monovalent inorganic cation transmembrane transporter activity;substrate-specific transmembrane transporter activity;substrate-specific transporter activity;transmembrane transporter activity;transporter activity	ATP-synt_F6	11	11	11	66.7	66.7	66.7	12.587	0	76.45	3122600000	228	27.2804	27.8833	27.5602	27.0431	27.5479	27.1847	27.381	27.5036	0.0374217	0.0671558
ATP synthase subunit f, mitochondrial	ATP5J2	P56134-3;P56134;C9JU26	P56134-3;P56134;C9JU26	transmembrane transporter activity;transporter activity	WRW	4	4	2	70.9	70.9	27.3	6.2953	0	7.0714	89343000	40	22.3159	22.5627	21.9653	22.3643	22.1345	22.1228	22.5142	22.4321	0.00111151	0.00231435
ATP synthase subunit g, mitochondrial	ATP5L	O75964;E9PN17	O75964;E9PN17	cation transmembrane transporter activity;hydrogen ion transmembrane transporter activity;inorganic cation transmembrane transporter activity;ion transmembrane transporter activity;monovalent inorganic cation transmembrane transporter activity;substrate-specific transmembrane transporter activity;substrate-specific transporter activity;transmembrane transporter activity;transporter activity	ATP-synt_G	15	15	15	92.2	92.2	92.2	11.428	0	44.305	2943600000	255	27.0347	27.4765	27.2695	26.8466	27.7632	27.2162	27.5501	27.4703	-0.343127	0.992176
ATP synthase subunit O, mitochondrial	ATP5O	P48047;H7C0C1;H7C086;H7C068	P48047;H7C0C1	binding;cation transmembrane transporter activity;drug binding;hydrogen ion transmembrane transporter activity;hydrogen ion transporting ATP synthase activity, rotational mechanism;inorganic cation transmembrane transporter activity;ion transmembrane transporter activity;monovalent inorganic cation transmembrane transporter activity;substrate-specific transmembrane transporter activity;substrate-…	OSCP	27	27	27	76.5	76.5	76.5	23.277	0	310.61	19543000000	710	29.6831	30.1582	30.0309	29.4665	30.4008	29.8629	30.215	30.1424	-0.320585	0.82572
V-type proton ATPase 116 kDa subunit a isoform 1;V-type proton ATPase subunit a	ATP6V0A1	Q93050-1;Q93050;Q93050-3;B7Z641;B7Z2A9;K7EM24;K7ELZ6;K7EN36;K7EPG4;K7EQW2;F5H1T6	Q93050-1;Q93050;Q93050-3;B7Z641;B7Z2A9	active transmembrane transporter activity;ATPase activity;ATPase activity, coupled;ATPase activity, coupled to movement of substances;ATPase activity, coupled to transmembrane movement of ions;ATPase activity, coupled to transmembrane movement of substances;ATPase binding;binding;catalytic activity;cation transmembrane transporter activity;cation-transporting ATPase activity;enzyme binding;hydrog…	V_ATPase_I	11	11	11	19	19	19	95.755	0	73.906	329140000	127	23.8085	24.5812	24.5108	23.9593	24.295	23.8951	24.4566	24.3068	-0.0234265	0.0354468
V-type proton ATPase subunit a;V-type proton ATPase 116 kDa subunit a isoform 2	ATP6V0A2	Q8TBM3;Q9Y487	Q8TBM3;Q9Y487	active transmembrane transporter activity;ATPase activity;ATPase activity, coupled;ATPase activity, coupled to movement of substances;ATPase activity, coupled to transmembrane movement of ions;ATPase activity, coupled to transmembrane movement of substances;ATPase binding;binding;catalytic activity;cation transmembrane transporter activity;cation-transporting ATPase activity;enzyme binding;hydrog…	V_ATPase_I	5	5	5	26.1	26.1	26.1	43.175	0	40.75	54037000	45	21.7589	21.5501	21.931	20.8483	21.3778	NaN	21.8049	21.8727	-0.16305	0.206876
V-type proton ATPase subunit d 1	ATP6V0D1	F5GYQ1;P61421;J3QL14;R4GN72;H3BQB4;H3BSG7;H3BUQ0;H3BTB5	F5GYQ1;P61421;J3QL14;R4GN72	active transmembrane transporter activity;ATPase activity;ATPase activity, coupled;ATPase activity, coupled to movement of substances;ATPase activity, coupled to transmembrane movement of ions;ATPase activity, coupled to transmembrane movement of ions, phosphorylative mechanism;ATPase activity, coupled to transmembrane movement of substances;catalytic activity;cation transmembrane transporter act…	vATP-synt_AC39	8	8	8	28.1	28.1	28.1	44.659	0	28.854	141430000	80	23.0922	22.9536	23.2855	22.5158	23.1467	22.7073	23.0521	22.9514	-0.00261307	0.00462421
V-type proton ATPase subunit E 1	ATP6V1E1	P36543-2;P36543;C9J8H1;P36543-3	P36543-2;P36543;C9J8H1;P36543-3	active transmembrane transporter activity;ATPase activity;ATPase activity, coupled;ATPase activity, coupled to movement of substances;ATPase activity, coupled to transmembrane movement of ions;ATPase activity, coupled to transmembrane movement of ions, phosphorylative mechanism;ATPase activity, coupled to transmembrane movement of substances;ATPase binding;binding;catalytic activity;cation transm…	vATP-synt_E	2	2	2	16.7	16.7	16.7	23.587	0	10.665	19098000	6	NaN	20.8286	NaN	22.1379	NaN	NaN	NaN	20.8317	0.651527	0
V-type proton ATPase subunit H	ATP6V1H	Q9UI12-2;Q9UI12;G3V126;E5RK31;E5RJG1;A0A0D9SG68;E5RG49;E5RHH0	Q9UI12-2;Q9UI12;G3V126	active transmembrane transporter activity;ATPase activity;ATPase activity, coupled;ATPase activity, coupled to movement of substances;ATPase activity, coupled to transmembrane movement of ions;ATPase activity, coupled to transmembrane movement of substances;catalytic activity;cation transmembrane transporter activity;cation-transporting ATPase activity;enzyme regulator activity;hydrogen ion trans…	V-ATPase_H_C;V-ATPase_H_N	3	3	3	11.2	11.2	11.2	54.151	0	3.9796	28749000	20	NaN	21.9375	NaN	21.3441	NaN	21.8864	NaN	NaN	-0.245614	0
ATPase inhibitor, mitochondrial	ATPIF1	Q9UII2;A0A0B4J230;Q9UII2-3;Q9UII2-2	Q9UII2;A0A0B4J230;Q9UII2-3;Q9UII2-2	angiostatin binding;ATPase binding;ATPase inhibitor activity;ATPase regulator activity;binding;calmodulin binding;enzyme binding;enzyme inhibitor activity;enzyme regulator activity;identical protein binding;nucleoside-triphosphatase regulator activity;protein binding;protein dimerization activity;protein homodimerization activity	IATP	2	2	2	29.2	29.2	29.2	12.249	0	4.9451	35970000	30	22.1591	18.8284	21.3189	20.2258	21.0848	NaN	20.9019	19.6915	0.0736601	0.0269829
Ancient ubiquitous protein 1	AUP1	Q9Y679-2;Q9Y679;Q9Y679-3	Q9Y679-2;Q9Y679;Q9Y679-3		CUE	5	5	5	24.4	24.4	24.4	45.786	0	13.525	52636000	34	21.6282	21.5424	22.2287	21.3264	21.9761	21.5461	21.5697	21.6911	-0.0143571	0.0225612
Aurora kinase A	AURKA	O14965;A3KFJ0;Q5QPD4;A3KFJ1;Q5QPD2;Q5QPD1;A3KFJ2;B4DXA6	O14965;A3KFJ0;Q5QPD4	adenyl nucleotide binding;adenyl ribonucleotide binding;ATP binding;binding;catalytic activity;enzyme binding;histone kinase activity;histone serine kinase activity;kinase activity;kinase binding;nucleotide binding;phosphotransferase activity, alcohol group as acceptor;protein binding;protein kinase activity;protein kinase binding;protein serine/threonine kinase activity;protein serine/threonine/…	Pkinase	36	36	33	81.9	81.9	78.9	45.809	0	186.1	3884200000	554	28.1898	28.2237	28.1848	27.9306	27.9962	28.1763	27.7638	28.0891	0.125877	0.518739
Aurora kinase B	AURKB	J3QLN8;Q96GD4-4;Q96GD4;Q96GD4-5;J3QR41;J3KT86;J3KTD6;Q96GD4-2;J3KRJ2;Q96GD4-3;J3KRF8;A0A0A0MSY3;Q5Y191;Q9UQB9-2;Q9UQB9-3;Q9UQB9;M0QYK8	J3QLN8;Q96GD4-4;Q96GD4;Q96GD4-5;J3QR41;J3KT86;J3KTD6;Q96GD4-2;J3KRJ2	adenyl nucleotide binding;adenyl ribonucleotide binding;ATP binding;binding;catalytic activity;cation binding;histone kinase activity;histone serine kinase activity;ion binding;kinase activity;metal ion binding;nucleotide binding;phosphotransferase activity, alcohol group as acceptor;protein kinase activity;protein serine/threonine kinase activity;protein serine/threonine/tyrosine kinase activity…	Pkinase	11	8	8	51.5	46.3	46.3	26.795	0	24.918	256000000	75	24.3311	24.2325	23.7904	23.7685	23.8787	24.0581	23.6621	24.2726	0.0627422	0.119493
Axin-1	AXIN1	O15169-2;O15169	O15169-2;O15169	armadillo repeat domain binding;beta-catenin binding;binding;enzyme activator activity;enzyme binding;enzyme regulator activity;GTPase activator activity;GTPase regulator activity;identical protein binding;I-SMAD binding;kinase binding;molecular transducer activity;nucleoside-triphosphatase regulator activity;protein binding;protein complex scaffold;protein dimerization activity;protein domain sp…	Axin_b-cat_bind;DIX;RGS	4	4	4	8.8	8.8	8.8	91.652	0	9.5181	55924000	33	21.4605	21.5132	21.8429	21.5839	21.8332	21.7834	NaN	21.7856	-0.200594	0.981259
5-azacytidine-induced protein 2	AZI2	Q9H6S1;C9JVK8;Q9H6S1-3;Q9H6S1-5;Q9H6S1-4;C9JGA2;H7C1Z1	Q9H6S1;C9JVK8;Q9H6S1-3;Q9H6S1-5;Q9H6S1-4		TBD	35	35	35	79.8	79.8	79.8	44.934	0	288.05	3205300000	497	27.8637	27.8937	27.9617	27.5702	27.7264	27.702	27.5458	27.7274	0.146927	0.744207
Barrier-to-autointegration factor;Barrier-to-autointegration factor, N-terminally processed	BANF1	O75531	O75531	binding;DNA binding;nucleic acid binding	BAF	11	11	11	84.3	84.3	84.3	10.058	0	55.242	3776600000	237	26.7562	27.4783	27.1559	27.2634	26.7125	28.4876	27.7301	27.9857	-0.565556	0.677444
B-cell receptor-associated protein 31	BCAP31	P51572;P51572-2	P51572;P51572-2			2	2	2	10.2	10.2	10.2	27.991	0.0085776	1.7866	40933000	10	21.5891	21.5252	21.546	NaN	21.5486	NaN	NaN	NaN	0.00480906	0
Bcl-2-associated transcription factor 1	BCLAF1	E9PK09;E9PQN2;E9PKI6;E9PK91;Q9NYF8-3;Q9NYF8-2;Q9NYF8;Q9NYF8-4;E9PJA7;H0YF00	E9PK09;E9PQN2;E9PKI6;E9PK91;Q9NYF8-3;Q9NYF8-2;Q9NYF8;Q9NYF8-4;E9PJA7	binding;DNA binding;nucleic acid binding	THRAP3_BCLAF1	8	8	8	16.8	16.8	16.8	83.231	0	9.1888	179830000	39	23.4142	23.9578	23.3586	23.3573	23.2547	23.5676	23.5749	23.5622	0.0321679	0.0693466
Mitochondrial chaperone BCS1	BCS1L	Q9Y276;H7BZF6;H7C492;C9J4Q9;C9JAS4;C9J1S9;C9J8G3	Q9Y276;H7BZF6;H7C492	adenyl nucleotide binding;adenyl ribonucleotide binding;ATP binding;binding;nucleotide binding;purine nucleotide binding;purine ribonucleoside triphosphate binding;purine ribonucleotide binding;ribonucleotide binding	AAA;BCS1_N	4	4	4	14.3	14.3	14.3	47.534	0	72.267	47367000	24	21.6348	22.2447	21.3659	NaN	NaN	21.2729	NaN	NaN	0.475592	0
BMP-2-inducible protein kinase	BMP2K	Q9NSY1;Q9NSY1-2;Q9NSY1-3;K4DI97;H0Y9P1	Q9NSY1;Q9NSY1-2;Q9NSY1-3;K4DI97	adenyl nucleotide binding;adenyl ribonucleotide binding;ATP binding;binding;catalytic activity;enzyme regulator activity;kinase activity;nucleotide binding;phosphatase regulator activity;phosphotransferase activity, alcohol group as acceptor;protein kinase activity;protein serine/threonine kinase activity;purine nucleotide binding;purine ribonucleoside triphosphate binding;purine ribonucleotide b…	BMP2K_C;Pkinase	41	37	36	48.3	46.9	46.9	129.17	0	323.31	2569900000	483	27.3573	27.3283	27.4048	27.0905	27.2954	27.4429	27.0272	27.3217	0.0234284	0.0749553
Bromodomain-containing protein 2	BRD2	H0Y6K2;P25440-3;P25440;A0A0G2JK44;P25440-4;P25440-2;H0Y799;E9PIQ3;U3KQA6;A0A0G2JHL0;A0A0G2JHN8;O60885-2;O60885-3	H0Y6K2;P25440-3;P25440;A0A0G2JK44;P25440-4;P25440-2;H0Y799;E9PIQ3;U3KQA6;A0A0G2JHL0	binding;chromatin binding;DNA binding;histone acetyl-lysine binding;histone binding;nucleic acid binding;p53 binding;protein binding	Bromodomain	5	5	4	11.8	11.8	10	88.288	0	44.379	113100000	45	22.741	23.0996	22.9381	22.8586	23.4099	23.2691	23.5882	22.9705	-0.400118	1.42375
Serine/threonine-protein kinase BRSK2	BRSK2	Q8IWQ3-3;Q8IWQ3-2;Q8IWQ3;Q8IWQ3-4;Q8IWQ3-5;Q8IWQ3-6;Q8TDC3;Q8TDC3-2;K7EN26;H0YES6;J3KNK0;Q8TDC3-3	Q8IWQ3-3;Q8IWQ3-2;Q8IWQ3;Q8IWQ3-4;Q8IWQ3-5;Q8IWQ3-6	adenyl nucleotide binding;adenyl ribonucleotide binding;ATP binding;binding;catalytic activity;cation binding;cytoskeletal protein binding;gamma-tubulin binding;ion binding;kinase activity;magnesium ion binding;metal ion binding;nucleotide binding;phosphotransferase activity, alcohol group as acceptor;protein binding;protein kinase activity;protein serine/threonine kinase activity;purine nucleoti…	Pkinase	14	14	14	29.3	29.3	29.3	74.74	0	31.344	206700000	75	23.8191	23.73	23.7642	23.4205	23.6126	23.5166	23.3855	24.0662	0.0382128	0.0796858
Mitotic checkpoint serine/threonine-protein kinase BUB1	BUB1	O43683-2;O43683-3;O43683	O43683-2;O43683-3;O43683	adenyl nucleotide binding;adenyl ribonucleotide binding;ATP binding;binding;catalytic activity;kinase activity;nucleotide binding;phosphotransferase activity, alcohol group as acceptor;protein kinase activity;protein serine/threonine kinase activity;purine nucleotide binding;purine ribonucleoside triphosphate binding;purine ribonucleotide binding;ribonucleotide binding;transferase activity;transf…	Mad3_BUB1_I;Pkinase	5	5	5	10.8	10.8	10.8	115.84	0	16.742	69020000	31	22.043	22.1303	22.3434	21.9346	22.1876	NaN	22.3185	22.3702	-0.179309	0.767554
Mitotic checkpoint protein BUB3	BUB3	J3QT28;O43684-2;O43684;J3QSX4	J3QT28;O43684-2;O43684;J3QSX4		WD40	8	8	8	36	36	36	31.703	0	29.928	134880000	55	22.9478	23.2196	23.0676	23.1407	23.0427	22.6457	22.8397	22.624	0.305878	1.4452
Uncharacterized protein C11orf57	C11orf57	Q6ZUT1;Q6ZUT1-2;Q6ZUT1-3;E9PSC8;E9PKA8;E9PQL5	Q6ZUT1;Q6ZUT1-2;Q6ZUT1-3;E9PSC8;E9PKA8			7	7	7	25.3	25.3	25.3	34.109	0	33.593	445240000	96	24.9627	25.1941	25.317	24.8194	24.8296	24.9223	24.9665	24.9996	0.143777	0.570804
Uncharacterized protein C18orf25	C18orf25	Q96B23-2	Q96B23-2		RNF111_N	12	12	1	45.6	45.6	5.6	36.977	0	66.739	1068000000	150	26.1721	26.4348	26.2973	25.9493	26.2642	26.1792	26.0143	26.2973	0.0246034	0.0728743
Complement component 1 Q subcomponent-binding protein, mitochondrial	C1QBP	Q07021;I3L3Q7;I3L3B0	Q07021;I3L3Q7;I3L3B0	adrenergic receptor binding;binding;carbohydrate binding;complement binding;complement component C1q binding;glycosaminoglycan binding;G-protein-coupled receptor binding;hyaluronic acid binding;kininogen binding;mRNA binding;nucleic acid binding;opsonin binding;pattern binding;polysaccharide binding;protein binding;protein binding transcription factor activity;receptor binding;RNA binding;transcr…	MAM33	10	10	10	53.9	53.9	53.9	31.362	0	104.64	1187700000	252	25.6861	26.0534	25.8788	26.1422	26.2898	25.8232	26.0519	26.0468	-0.1128	0.349535
Protein C21orf2	C21orf2	O43822-3;O43822;O43822-2;O43822-4	O43822-3;O43822;O43822-2;O43822-4		LRR_4	7	7	7	42.4	42.4	42.4	28.253	0	31.71	94546000	61	22.2531	22.4872	22.1325	22.51	22.2537	21.8091	22.1502	22.3035	0.216623	0.735269
C2 domain-containing protein 5	C2CD5	Q86YS7-3;Q86YS7;Q86YS7-2;Q86YS7-4;Q86YS7-5;H0YFE9;H0YFC4;H0YGU7	Q86YS7-3;Q86YS7;Q86YS7-2;Q86YS7-4;Q86YS7-5	binding;calcium ion binding;calcium-dependent phospholipid binding;cation binding;ion binding;lipid binding;metal ion binding;phospholipid binding	C2	37	37	37	52	52	52	116.03	0	154.44	1009900000	232	25.8041	25.9377	25.7693	25.235	26.0044	25.9816	25.9462	25.9411	-0.281802	0.920873
Carbonic anhydrase 2	CA2	P00918	P00918	arylesterase activity;binding;carbonate dehydratase activity;carbon-oxygen lyase activity;carboxylic ester hydrolase activity;catalytic activity;cation binding;hydrolase activity;hydrolase activity, acting on ester bonds;hydro-lyase activity;ion binding;lyase activity;metal ion binding;transition metal ion binding;zinc ion binding	Carb_anhydrase	3	3	3	13.5	13.5	13.5	29.246	0	4.9078	52870000	22	22.7151	20.5238	20.8454	23.4695	21.971	NaN	22.0495	20.4932	0.383874	0.153859
CDK5 and ABL1 enzyme substrate 1	CABLES1	Q8TDN4;Q8TDN4-2;Q8TDN4-4;Q8TDN4-3;V9GYB4;H0Y5H2	Q8TDN4;Q8TDN4-2;Q8TDN4-4		Cyclin_N	10	10	9	31.9	31.9	30	67.598	0	38.328	217230000	59	23.7326	23.8869	23.8309	23.2127	23.8581	23.6343	23.5774	23.4477	0.0363832	0.0738949
CDK5 and ABL1 enzyme substrate 2	CABLES2	Q9BTV7	Q9BTV7		Cyclin_N	3	2	2	12.1	9.6	9.6	52.235	0	5.0428	23805000	10	20.9494	NaN	NaN	20.9168	NaN	21.0385	NaN	NaN	-0.105421	0
Calcyclin-binding protein	CACYBP	Q9HB71;Q9HB71-3;B2ZWH1;Q9HB71-2	Q9HB71;Q9HB71-3	binding;identical protein binding;protein binding;protein dimerization activity;protein homodimerization activity	CS;SGS;Siah-Interact_N	7	7	7	46.9	46.9	46.9	26.21	0	15.923	110560000	16	23.2131	NaN	22.4109	24.2782	22.7524	22.707	22.7313	22.4744	0.634462	0.647096
CAD protein;Glutamine-dependent carbamoyl-phosphate synthase;Aspartate carbamoyltransferase;Dihydroorotase	CAD	F8VPD4;P27708;H7C2E4;H7C3Z5	F8VPD4;P27708	adenyl nucleotide binding;adenyl ribonucleotide binding;amine binding;amino acid binding;aspartate binding;aspartate carbamoyltransferase activity;ATP binding;binding;carbamoyl-phosphate synthase (ammonia) activity;carbamoyl-phosphate synthase (glutamine-hydrolyzing) activity;carbon-nitrogen ligase activity, with glutamine as amido-N-donor;carboxyl- or carbamoyltransferase activity;carboxylic aci…	Amidohydro_1;CPSase_L_chain;CPSase_L_D2;CPSase_L_D3;CPSase_sm_chain;GATase;MGS;OTCace;OTCace_N	11	11	11	10	10	10	236.02	0	27.821	123000000	43	22.8638	22.8452	22.7709	22.7331	22.3747	23.0416	22.8359	23.0509	-0.0225086	0.0488646
Calcium-binding and coiled-coil domain-containing protein 2	CALCOCO2	Q13137;Q13137-3;Q13137-4;D6REB0;Q13137-5;Q13137-2;D6RF70;D6RJE7;I3L493;H0Y9G3;D6RBI4;H0YBP4;I3L4E1	Q13137;Q13137-3;Q13137-4;D6REB0;Q13137-5;Q13137-2;D6RF70	binding;identical protein binding;protein binding;protein dimerization activity;protein homodimerization activity	CALCOCO1	10	10	10	39.7	39.7	39.7	52.253	0	19.211	126100000	50	23.0482	23.2738	23.0195	23.3266	23.1726	22.9989	22.8431	23.0035	0.162518	0.781461
Calmodulin	CALM2;CALM1;CALM3	H0Y7A7;P62158;M0QZ52;F8WBR5;G3V479;E7ETZ0;E7EMB3;Q96HY3;G3V226;G3V361;P27482;C9J7T9;P02585	H0Y7A7;P62158;M0QZ52;F8WBR5;G3V479;E7ETZ0;E7EMB3	binding;calcium ion binding;catalytic activity;cation binding;cytoskeletal protein binding;enzyme activator activity;enzyme binding;enzyme regulator activity;ion binding;ion channel binding;kinase activator activity;kinase activity;kinase binding;kinase regulator activity;metal ion binding;nitric-oxide synthase regulator activity;N-terminal myristoylation domain binding;phosphatase activator acti…	EF-hand_1;EF-hand_6;EF-hand_7	9	9	9	41.7	41.7	41.7	20.762	0	323.31	2209200000	200	26.9031	27.0192	26.9933	27.2853	27.1312	26.8751	26.8879	26.8729	0.108472	0.473727
Calreticulin	CALR	P27797;K7EJB9;K7EL50	P27797	androgen receptor binding;binding;calcium ion binding;carbohydrate binding;cation binding;chaperone binding;complement binding;complement component C1q binding;DNA binding;enzyme binding;glycoprotein binding;hormone binding;hormone receptor binding;integrin binding;ion binding;iron ion binding;metal ion binding;mRNA binding;nuclear hormone receptor binding;nucleic acid binding;opsonin binding;pep…	Calreticulin	9	9	9	38.1	38.1	38.1	48.141	0	55.874	119520000	56	23.3441	22.1313	21.9152	24.5268	22.5531	21.3916	22.5691	22.3188	0.771216	0.537208
Calcium/calmodulin-dependent protein kinase type II subunit beta	CAMK2B	Q13554-4;Q13554-3;Q13554-5;Q13554-7;Q13554-8;Q13554-2;Q13554;Q13554-6;H7BXS4;H7BZC6;E9PBE8;H7C394;E7ETC9;E7ERS6	Q13554-4;Q13554-3;Q13554-5;Q13554-7;Q13554-8;Q13554-2;Q13554;Q13554-6;H7BXS4	adenyl nucleotide binding;adenyl ribonucleotide binding;ATP binding;binding;calmodulin-dependent protein kinase activity;catalytic activity;identical protein binding;kinase activity;nucleotide binding;phosphotransferase activity, alcohol group as acceptor;protein binding;protein dimerization activity;protein homodimerization activity;protein kinase activity;protein serine/threonine kinase activit…	CaMKII_AD;Pkinase	30	11	11	68.7	26.9	26.9	54.073	0	52.62	476760000	75	24.6135	24.5337	24.5092	24.7045	24.3278	24.6527	24.5673	24.5672	0.0615053	0.314189
Calcium/calmodulin-dependent protein kinase type II subunit delta	CAMK2D	Q13557;Q13557-6;Q13557-11;D6R938;E9PF82;Q13557-8;Q13557-10;E9PBG7;Q13557-3;Q13557-4;Q13557-9;Q13557-5;H0Y9J2;H0Y9C2	Q13557;Q13557-6;Q13557-11;D6R938;E9PF82;Q13557-8;Q13557-10;E9PBG7;Q13557-3;Q13557-4;Q13557-9;Q13557-5	adenyl nucleotide binding;adenyl ribonucleotide binding;ATP binding;binding;calmodulin binding;calmodulin-dependent protein kinase activity;catalytic activity;channel inhibitor activity;channel regulator activity;cytoskeletal protein binding;identical protein binding;ion channel binding;ion channel inhibitor activity;kinase activity;nucleotide binding;phosphotransferase activity, alcohol group as…	CaMKII_AD;Pkinase	60	60	3	89.6	89.6	6	56.369	0	323.31	102780000000	2417	32.427	32.3707	32.487	32.2359	32.2424	32.3714	32.059	32.3147	0.133263	0.757943
Calcium/calmodulin-dependent protein kinase type II subunit gamma	CAMK2G	Q13555-6;A0A0A0MS52;Q5SWX3;Q13555-5	Q13555-6;A0A0A0MS52;Q5SWX3;Q13555-5	adenyl nucleotide binding;adenyl ribonucleotide binding;ATP binding;binding;calcium-dependent protein serine/threonine phosphatase activity;calmodulin binding;calmodulin-dependent protein kinase activity;catalytic activity;hydrolase activity;hydrolase activity, acting on ester bonds;identical protein binding;kinase activity;nucleotide binding;phosphatase activity;phosphoprotein phosphatase activi…	CaMKII_AD;Pkinase	47	37	2	74.8	59.4	4.6	65.241	0	323.31	20169000000	1107	30.1979	30.0495	30.0305	29.9101	29.9879	30.0617	29.8036	30.0411	0.0733905	0.385069
Calcium/calmodulin-dependent protein kinase kinase 2	CAMKK2	Q96RR4-2;Q96RR4-3;Q96RR4-7;Q96RR4;Q96RR4-6;Q96RR4-5;Q96RR4-4;F5GZ00;F5H4I7	Q96RR4-2;Q96RR4-3;Q96RR4-7;Q96RR4;Q96RR4-6;Q96RR4-5;Q96RR4-4;F5GZ00	adenyl nucleotide binding;adenyl ribonucleotide binding;ATP binding;binding;calcium ion binding;calmodulin binding;calmodulin-dependent protein kinase activity;catalytic activity;cation binding;ion binding;kinase activity;metal ion binding;nucleotide binding;phosphotransferase activity, alcohol group as acceptor;protein binding;protein kinase activity;protein serine/threonine kinase activity;prot…	Pkinase	20	20	20	50.8	50.8	50.8	58.899	0	178.81	1941900000	388	27.1847	27.0977	27.1529	26.7272	26.9864	27.0328	26.6915	27.0017	0.112492	0.368153
Cullin-associated NEDD8-dissociated protein 1	CAND1	Q86VP6;Q86VP6-2;A0A0C4DGH5;F5H6I6;H0YH27;Q86VP6-3	Q86VP6;Q86VP6-2		TIP120	10	10	10	15.3	15.3	15.3	136.37	0	36.246	216260000	119	23.629	23.4842	23.3351	23.8509	23.4266	23.2148	23.7621	23.4955	0.100046	0.260612
Calnexin	CANX	P27824;P27824-2;P27824-3;D6RFL1;D6RAU8;D6RB85;D6RDP7;H0Y9Q7;D6RGY2;D6RAQ8;H0Y9H1	P27824;P27824-2;P27824-3	binding;calcium ion binding;carbohydrate binding;cation binding;ion binding;metal ion binding	Calreticulin	6	6	6	18.9	18.9	18.9	67.567	0	10.056	39195000	17	22.0849	NaN	NaN	23.0806	NaN	NaN	NaN	NaN	NaN	0
F-actin-capping protein subunit alpha-1	CAPZA1	P52907	P52907	actin binding;binding;cytoskeletal protein binding;protein binding	F-actin_cap_A	6	6	6	38.5	38.5	38.5	32.922	0	10.231	62277000	29	21.9752	21.9605	21.4562	22.6927	21.8425	21.876	NaN	22.1153	0.0765125	0.089119
F-actin-capping protein subunit beta	CAPZB	P47756-2;P47756;B1AK85;B1AK87;B1AK88	P47756-2;P47756;B1AK85;B1AK87;B1AK88	actin binding;actin filament binding;binding;cytoskeletal protein binding;protein binding	F_actin_cap_B	4	4	4	19.9	19.9	19.9	30.628	0	37.523	380830000	52	24.2379	23.7122	24.0337	24.6831	24.0304	24.1438	24.1089	24.1456	0.0595832	0.107244
Caveolin-1;Caveolin	CAV1	Q03135;E9PCT5;P56539	Q03135;E9PCT5	binding;calcium channel regulator activity;channel inhibitor activity;channel regulator activity;cholesterol binding;connexin binding;enzyme activator activity;enzyme binding;enzyme regulator activity;identical protein binding;inward rectifier potassium channel inhibitor activity;ion channel binding;ion channel inhibitor activity;kinase binding;lipid binding;nitric-oxide synthase binding;patched …	Caveolin	5	5	3	39.9	39.9	23.6	20.471	0	12.583	278240000	51	23.5909	24.0795	24.4936	23.902	24.4806	23.8648	24.296	24.215	-0.197595	0.376687
Caveolin;Caveolin-1	CAV1	C9JKI3;Q03135-2	C9JKI3;Q03135-2	binding;channel inhibitor activity;channel regulator activity;cholesterol binding;enzyme activator activity;enzyme binding;enzyme regulator activity;identical protein binding;inward rectifier potassium channel inhibitor activity;ion channel binding;ion channel inhibitor activity;kinase binding;lipid binding;nitric-oxide synthase binding;patched binding;peptidase activator activity;peptidase regul…	Caveolin	4	2	2	31.9	10.9	10.9	15.928	0	3.5389	63126000	10	NaN	NaN	21.8004	21.9247	22.1267	NaN	NaN	NaN	-0.264145	0
Caveolin;Caveolin-2	CAV2	E9PCT3;P51636-3;P51636;P51636-2	E9PCT3;P51636-3;P51636;P51636-2	binding;D1 dopamine receptor binding;dopamine receptor binding;G-protein-coupled receptor binding;identical protein binding;protein binding;protein dimerization activity;protein homodimerization activity;receptor binding	Caveolin	2	2	2	38.1	38.1	38.1	12.953	0	3.7088	54318000	11	21.6183	21.9262	NaN	NaN	NaN	21.9419	22.3754	NaN	-0.386399	0.547749
Chromobox protein homolog 3	CBX3	Q13185;S4R2Y4;C9JMM0;B8ZZ43	Q13185	binding;enzyme binding;identical protein binding;protein binding;protein domain specific binding	Chromo;Chromo_shadow	8	8	6	58.5	58.5	58.5	20.811	0	49.361	224230000	61	23.4635	23.5116	23.3321	23.4512	23.0372	24.4078	23.9385	23.7393	-0.34108	0.552956
Cyclin-A2	CCNA2	P20248	P20248		Cyclin_C;Cyclin_N	7	7	7	30.6	30.6	30.6	48.55	0	49.882	375310000	91	24.4008	24.4081	24.4573	23.972	24.6658	24.357	23.9761	24.3849	-0.0364027	0.0718556
G2/mitotic-specific cyclin-B1	CCNB1	P14635;E9PC90;P14635-2;D6RHI0;H0YA62	P14635;E9PC90;P14635-2	binding;catalytic activity;enzyme binding;histone kinase activity;kinase activity;kinase binding;patched binding;phosphotransferase activity, alcohol group as acceptor;protein binding;protein kinase activity;protein kinase binding;receptor binding;transferase activity;transferase activity, transferring phosphorus-containing groups	Cyclin_C;Cyclin_N	13	13	13	45	45	45	48.337	0	187.02	1303300000	233	26.3642	26.2795	26.4672	25.913	26.4026	26.0738	26.2237	26.3434	-0.00487518	0.0116653
Cyclin-H	CCNH	P51946;D6RHI7;D6RG18	P51946;D6RHI7;D6RG18	catalytic activity;cyclin-dependent protein kinase regulator activity;enzyme regulator activity;kinase activity;kinase regulator activity;protein kinase regulator activity;transferase activity;transferase activity, transferring phosphorus-containing groups	Cyclin_N	11	11	11	46.4	46.4	46.4	37.643	0	47.962	198050000	79	23.8106	23.8029	23.706	23.2811	23.8304	23.5385	23.8201	23.8355	-0.105978	0.308131
Cyclin-K	CCNK	G3V5E1;O75909-1;O75909;G3V2Q3;O75909-2;O75909-4;G3V235	G3V5E1;O75909-1;O75909;G3V2Q3;O75909-2;O75909-4	binding;catalytic activity;cyclin-dependent protein kinase activity;enzyme binding;kinase activity;kinase binding;phosphotransferase activity, alcohol group as acceptor;protein binding;protein kinase activity;protein kinase binding;protein serine/threonine kinase activity;RNA polymerase II carboxy-terminal domain kinase activity;transferase activity;transferase activity, transferring phosphorus-c…	Cyclin_N	4	4	4	20.1	20.1	20.1	43.404	0	15.882	77814000	24	22.4655	22.7213	22.5466	NaN	22.5815	22.6219	21.9966	22.3557	0.188862	0.46293
Cyclin-T1	CCNT1	O60563	O60563	binding;chromatin binding;DNA binding;nucleic acid binding;regulatory region DNA binding;regulatory region nucleic acid binding;RNA binding;snRNA binding;transcription regulatory region DNA binding	Cyclin_N	9	9	9	23.4	23.4	23.4	80.684	0	37.192	144210000	62	22.8282	23.26	23.1059	22.4828	23.0788	22.868	23.0809	23.3277	-0.169672	0.379452
T-complex protein 1 subunit beta	CCT2	P78371;F5GWF6;F8VQ14;P78371-2	P78371;F5GWF6;F8VQ14;P78371-2	adenyl nucleotide binding;adenyl ribonucleotide binding;ATP binding;binding;enzyme binding;nucleotide binding;protein binding;purine nucleotide binding;purine ribonucleoside triphosphate binding;purine ribonucleotide binding;ribonucleotide binding;ubiquitin protein ligase binding;unfolded protein binding	Cpn60_TCP1	26	26	26	61.7	61.7	61.7	57.488	0	138.28	407110000	165	24.7694	24.0033	24.2847	25.6167	24.5262	23.8913	24.5486	24.1998	0.377035	0.435924
T-complex protein 1 subunit gamma	CCT3	P49368;B4DUR8;P49368-2;Q5SZX6;E9PRC8;E9PQ35;E9PM09;Q5SZW8;Q5SZX9	P49368;B4DUR8;P49368-2	adenyl nucleotide binding;adenyl ribonucleotide binding;ATP binding;binding;nucleotide binding;protein binding;purine nucleotide binding;purine ribonucleoside triphosphate binding;purine ribonucleotide binding;ribonucleotide binding;unfolded protein binding	Cpn60_TCP1	16	16	16	47.7	47.7	47.7	60.533	0	41.307	427560000	115	24.9424	24.1871	24.2987	25.4184	24.5449	24.3711	24.4245	24.1257	0.345082	0.528491
T-complex protein 1 subunit delta	CCT4	P50991;P50991-2	P50991;P50991-2	adenyl nucleotide binding;adenyl ribonucleotide binding;ATP binding;binding;nucleotide binding;protein binding;purine nucleotide binding;purine ribonucleoside triphosphate binding;purine ribonucleotide binding;ribonucleotide binding;unfolded protein binding	Cpn60_TCP1	19	19	19	54.4	54.4	54.4	57.924	0	84.008	316110000	92	24.5009	23.6638	23.906	25.1099	23.9575	23.6247	24.2014	23.7442	0.413245	0.55395
T-complex protein 1 subunit epsilon	CCT5	P48643;B7ZAR1;E9PCA1;E7ENZ3;P48643-2;D6RIZ7	P48643;B7ZAR1;E9PCA1;E7ENZ3;P48643-2	adenyl nucleotide binding;adenyl ribonucleotide binding;ATP binding;beta-tubulin binding;binding;cytoskeletal protein binding;G-protein beta-subunit binding;nucleotide binding;protein binding;purine nucleotide binding;purine ribonucleoside triphosphate binding;purine ribonucleotide binding;ribonucleotide binding;tubulin binding	Cpn60_TCP1	17	17	17	49.5	49.5	49.5	59.67	0	85.199	311660000	96	24.6475	23.1188	23.8248	25.2741	23.8967	23.4215	24.3148	23.5849	0.411829	0.346254
T-complex protein 1 subunit zeta	CCT6A	P40227;P40227-2;Q92526-2;Q92526;Q92526-3;J3KRI6	P40227;P40227-2	adenyl nucleotide binding;adenyl ribonucleotide binding;ATP binding;binding;nucleotide binding;protein binding;protein transporter activity;purine nucleotide binding;purine ribonucleoside triphosphate binding;purine ribonucleotide binding;ribonucleotide binding;substrate-specific transporter activity;transporter activity;unfolded protein binding	Cpn60_TCP1	19	19	19	54.8	54.8	54.8	58.024	0	116.18	376440000	161	24.8223	23.7875	24.0924	25.4291	24.3507	23.6941	24.4459	23.8972	0.435852	0.482122
T-complex protein 1 subunit eta	CCT7	Q99832;Q99832-3;Q99832-4;Q99832-2;F8WAM2;F8WBP8	Q99832;Q99832-3;Q99832-4;Q99832-2	adenyl nucleotide binding;adenyl ribonucleotide binding;ATP binding;binding;nucleotide binding;protein binding;purine nucleotide binding;purine ribonucleoside triphosphate binding;purine ribonucleotide binding;ribonucleotide binding;unfolded protein binding	Cpn60_TCP1	15	15	15	41.6	41.6	41.6	59.366	0	82.17	258120000	113	24.2894	23.6457	23.7643	25.1891	23.6496	23.2208	23.8847	23.2311	0.725585	0.95735
T-complex protein 1 subunit theta	CCT8	P50990;P50990-2;P50990-3;H7C4C8;H7C2U0	P50990;P50990-2;P50990-3;H7C4C8	adenyl nucleotide binding;adenyl ribonucleotide binding;ATP binding;ATPase activity;ATPase activity, coupled;binding;catalytic activity;hydrolase activity;hydrolase activity, acting on acid anhydrides;hydrolase activity, acting on acid anhydrides, in phosphorus-containing anhydrides;nucleoside-triphosphatase activity;nucleotide binding;purine nucleotide binding;purine ribonucleoside triphosphate …	Cpn60_TCP1	16	16	16	40	40	40	59.62	0	50.456	248610000	81	24.3715	23.645	24.0747	25.102	23.7778	23.0727	23.1511	22.8574	1.08359	1.60298
CD44 antigen	CD44	H0YD13;P16070-18;P16070-12;P16070-14;P16070-13;P16070-11;P16070-10;P16070-16;P16070-8;P16070-17;P16070-6;P16070-4;P16070-3;P16070-7;P16070-5;P16070;H0YDW7;H0YCV9;H0Y2P0;H0Y5E4;P16070-15;P16070-9;E9PKC6;H0YDX6;H0YD17;Q86UZ1;H0YE40;P16070-19	H0YD13;P16070-18;P16070-12;P16070-14;P16070-13;P16070-11;P16070-10;P16070-16;P16070-8;P16070-17;P16070-6;P16070-4;P16070-3;P16070-7;P16070-5;P16070;H0YDW7;H0YCV9;H0Y2P0;H0Y5E4;P16070-15;P16070-9;E9PKC6;H0YDX6;H0YD17	binding;carbohydrate binding;catalytic activity;collagen binding;glycosaminoglycan binding;hexosaminidase activity;hyaluronic acid binding;hyalurononglucosaminidase activity;hydrolase activity;hydrolase activity, acting on glycosyl bonds;hydrolase activity, hydrolyzing O-glycosyl compounds;pattern binding;polysaccharide binding;protein binding	Xlink	4	4	4	22.8	22.8	22.8	22.683	0	7.2635	81637000	25	22.2711	22.0539	22.5281	22.6664	22.2035	22.2352	22.52	22.2798	0.0702801	0.177877
Cyclin-dependent kinase 1	CDC2;CDK1	A0A024QZP7;P06493;P06493-2;A0A087WZZ9;E5RIU6	A0A024QZP7;P06493;P06493-2;A0A087WZZ9;E5RIU6	adenyl nucleotide binding;adenyl ribonucleotide binding;ATP binding;binding;catalytic activity;cyclin-dependent protein kinase activity;histone kinase activity;kinase activity;nucleotide binding;phosphotransferase activity, alcohol group as acceptor;protein kinase activity;protein serine/threonine kinase activity;purine nucleotide binding;purine ribonucleoside triphosphate binding;purine ribonucl…	Pkinase	23	21	21	79.8	77.1	77.1	34.081	0	49.093	1270400000	183	26.2193	26.317	26.3316	26.1488	26.497	26.0358	26.2882	26.2197	-0.00603819	0.019626
Cell division control protein 42 homolog	CDC42	P60953;Q5JYX0;P60953-1	P60953	apolipoprotein A-I receptor binding;apolipoprotein receptor binding;binding;catalytic activity;enzyme binding;GTP binding;GTPase activity;guanyl nucleotide binding;guanyl ribonucleotide binding;hydrolase activity;hydrolase activity, acting on acid anhydrides;hydrolase activity, acting on acid anhydrides, in phosphorus-containing anhydrides;identical protein binding;kinase binding;nucleoside-triph…	Ras	3	3	3	25.1	25.1	25.1	21.258	0	4.4703	18765000	3	21.8955	NaN	NaN	22.5408	NaN	NaN	NaN	NaN	NaN	0
Serine/threonine-protein kinase MRCK beta	CDC42BPB	Q9Y5S2;H0YLY0	Q9Y5S2	adenyl nucleotide binding;adenyl ribonucleotide binding;ATP binding;binding;catalytic activity;cation binding;ion binding;kinase activity;magnesium ion binding;metal ion binding;nucleotide binding;phosphotransferase activity, alcohol group as acceptor;protein kinase activity;protein serine/threonine kinase activity;purine nucleotide binding;purine ribonucleoside triphosphate binding;purine ribonu…	C1_1;CNH;DMPK_coil;Pkinase	12	12	11	9.6	9.6	9	194.31	0	25.804	108720000	47	22.9208	23.0573	22.9583	22.4579	23.3633	23.0247	22.9143	23.1	-0.252024	0.756099
Cyclin-dependent kinase 11B;Cyclin-dependent kinase 11A	CDK11B;CDC2L1;CDK11A	A0A0D9SEI3;J3QKR5;B7ZVY7;A0A0D9SER5;A0A0D9SEN2;J3QR44;P21127-8;P21127-3;P21127-2;P21127;J3QR29;Q5QPR3;P21127-12;P21127-4;P21127-5;P21127-10;P21127-6;P21127-9;Q9UQ88-4;Q9UQ88-3;Q9UQ88-2;Q9UQ88;Q5QPR4;Q9UQ88-5;Q9UQ88-10;Q9UQ88-9;Q5QPQ9;E9PFJ2;A0A087WYI9;A0A087X1I0;J3KS35;E7ESP2	A0A0D9SEI3;J3QKR5;B7ZVY7;A0A0D9SER5;A0A0D9SEN2;J3QR44;P21127-8;P21127-3;P21127-2;P21127;J3QR29;Q5QPR3;P21127-12;P21127-4;P21127-5;P21127-10;P21127-6;P21127-9;Q9UQ88-4;Q9UQ88-3;Q9UQ88-2;Q9UQ88;Q5QPR4;Q9UQ88-5;Q9UQ88-10	adenyl nucleotide binding;adenyl ribonucleotide binding;ATP binding;binding;catalytic activity;cyclin-dependent protein kinase activity;kinase activity;nucleotide binding;phosphotransferase activity, alcohol group as acceptor;protein kinase activity;protein serine/threonine kinase activity;purine nucleotide binding;purine ribonucleoside triphosphate binding;purine ribonucleotide binding;ribonucle…	Pkinase	11	11	7	17.6	17.6	13.3	89.437	0	18.523	202760000	75	23.8779	23.9492	23.8901	23.6961	23.7845	23.7984	23.2185	23.7379	0.218554	0.710781
Cyclin-dependent kinase 12	CDK12	Q9NYV4-2;Q9NYV4;J3QSD7;Q9NYV4-3;Q9BVE2;A0A087X209;H0YLT2	Q9NYV4-2;Q9NYV4;J3QSD7;Q9NYV4-3	adenyl nucleotide binding;adenyl ribonucleotide binding;ATP binding;binding;catalytic activity;cyclin binding;cyclin-dependent protein kinase activity;kinase activity;nucleotide binding;phosphotransferase activity, alcohol group as acceptor;protein binding;protein kinase activity;protein serine/threonine kinase activity;purine nucleotide binding;purine ribonucleoside triphosphate binding;purine r…	Pkinase	24	23	21	27	26.5	25.3	163.23	0	197.98	794720000	262	25.5957	25.7952	25.6809	25.3192	25.8362	25.7402	25.7652	25.8023	-0.188196	0.923684
Cyclin-dependent kinase 17	CDK17	F5H6Z0;Q00537-2;Q00537;F8VZY6;F8VQZ9	F5H6Z0;Q00537-2;Q00537	adenyl nucleotide binding;adenyl ribonucleotide binding;ATP binding;binding;catalytic activity;cyclin-dependent protein kinase activity;kinase activity;nucleotide binding;phosphotransferase activity, alcohol group as acceptor;protein kinase activity;protein serine/threonine kinase activity;purine nucleotide binding;purine ribonucleoside triphosphate binding;purine ribonucleotide binding;ribonucle…	Pkinase	6	5	2	17.7	16	6.6	53.533	0	10.464	59179000	31	22.0861	21.8225	21.186	21.6796	22.2368	NaN	NaN	22.2106	-0.530146	0.869932
Cyclin-dependent kinase 2	CDK2	P24941;G3V5T9;P24941-2;E7ESI2;G3V317;K7EJ83	P24941;G3V5T9;P24941-2;E7ESI2	adenyl nucleotide binding;adenyl ribonucleotide binding;ATP binding;binding;catalytic activity;cation binding;cyclin binding;cyclin-dependent protein kinase activity;ion binding;kinase activity;metal ion binding;nucleotide binding;phosphotransferase activity, alcohol group as acceptor;protein binding;protein kinase activity;protein serine/threonine kinase activity;purine nucleotide binding;purine…	Pkinase	37	36	33	95	92.3	92.3	33.929	0	168.27	7295600000	612	28.8854	28.8177	28.7	28.5269	28.757	28.7319	28.4864	28.6979	0.0642276	0.264235
Cyclin-dependent-like kinase 5	CDK5	Q00535;Q00535-2;F8VXD2;F8VZZ0;F8VZ51;H0YAZ9;E7EUK8;Q96Q40-2;Q96Q40-4;Q96Q40-3;O94921-3;Q96Q40-5;Q96Q40;O94921-2;O94921	Q00535;Q00535-2	acetylcholine receptor activator activity;acetylcholine receptor regulator activity;adenyl nucleotide binding;adenyl ribonucleotide binding;ATP binding;binding;catalytic activity;cation binding;cyclin binding;cyclin-dependent protein kinase activity;ErbB-2 class receptor binding;ErbB-3 class receptor binding;ion binding;kinase activity;metal ion binding;nucleotide binding;phosphotransferase activ…	Pkinase	41	41	40	96.2	96.2	93.5	33.304	0	323.31	13560000000	1026	29.6289	29.7074	29.6561	29.1567	29.6374	29.6475	29.4531	29.6054	-0.0485759	0.135187
Cyclin-dependent kinase 7	CDK7	D6RAD4;P50613;D6RFL0;D6RGG9;D6RI01;D6R9Z2;D6RF14;D6RIG9;A0A0D9SFW9;D6R9G1	D6RAD4;P50613;D6RFL0;D6RGG9;D6RI01;D6R9Z2;D6RF14;D6RIG9;A0A0D9SFW9	adenyl nucleotide binding;adenyl ribonucleotide binding;androgen receptor binding;ATP binding;ATPase activity;ATPase activity, coupled;binding;catalytic activity;cyclin-dependent protein kinase activity;DNA-dependent ATPase activity;hormone receptor binding;hydrolase activity;hydrolase activity, acting on acid anhydrides;hydrolase activity, acting on acid anhydrides, in phosphorus-containing anhy…	Pkinase	4	4	4	20.4	20.4	20.4	34.643	0	9.8168	95609000	23	22.7752	23.0672	22.2904	22.536	22.5726	21.9359	22.695	22.8352	0.157516	0.24778
Cyclin-dependent kinase 9	CDK9	P50750;P50750-2;X6RE90	P50750;P50750-2	adenyl nucleotide binding;adenyl ribonucleotide binding;ATP binding;binding;catalytic activity;chromatin binding;cyclin-dependent protein kinase activity;DNA binding;kinase activity;nucleic acid binding;nucleotide binding;phosphotransferase activity, alcohol group as acceptor;protein kinase activity;protein serine/threonine kinase activity;purine nucleotide binding;purine ribonucleoside triphosph…	Pkinase	18	17	17	44.6	44.6	44.6	42.777	0	109.15	1402300000	276	26.2954	26.1796	26.2346	26.1626	26.4968	26.3095	26.3343	26.381	-0.162306	1.71241
Cerebellar degeneration-related protein 2	CDR2	H3BU23;Q01850	H3BU23;Q01850			1	1	1	6.4	6.4	6.4	27	0.0086518	1.8169	1011000000	23	NaN	25.473	25.641	NaN	NaN	25.8359	25.5754	25.6178	-0.119377	0.399653
Protein CEBPZOS	CEBPZOS	A8MTT3	A8MTT3			6	6	6	78.8	78.8	78.8	9.3358	0	60.159	1502300000	151	26.1711	26.3658	26.4351	25.763	26.681	26.0772	26.3824	26.4596	-0.216302	0.506086
Ceramide synthase 6	CERS6	Q6ZMG9;Q6ZMG9-2	Q6ZMG9;Q6ZMG9-2	binding;catalytic activity;DNA binding;N-acyltransferase activity;nucleic acid binding;sphingosine N-acyltransferase activity;transferase activity;transferase activity, transferring acyl groups;transferase activity, transferring acyl groups other than amino-acyl groups	Homeobox;TRAM_LAG1_CLN8	2	2	2	6	6	6	44.889	0	3.6968	76231000	41	21.9111	22.1493	22.147	21.6892	22.2163	21.938	NaN	22.3438	-0.191864	0.528715
Cofilin-1	CFL1	P23528;E9PP50;G3V1A4;E9PK25;E9PQB7;E9PS23;E9PLJ3	P23528;E9PP50;G3V1A4;E9PK25;E9PQB7;E9PS23;E9PLJ3		Cofilin_ADF	14	14	11	72.9	72.9	54.2	18.502	0	91.583	1405100000	273	26.576	26.0014	25.966	27.3916	26.3047	25.8474	26.2342	26.1999	0.337226	0.430903
Cofilin-2	CFL2	Q9Y281-3;Q9Y281;F8WDN3	Q9Y281-3;Q9Y281		Cofilin_ADF	5	2	2	40.9	20.1	20.1	16.916	0	10.379	375650000	5	24.249	24.0707	24.2748	24.2443	24.0547	23.565	24.986	24.4634	-0.0575681	0.0671552
MICOS complex subunit MIC19	CHCHD3	C9JRZ6;Q9NX63;F8WAR4;F8WD73	C9JRZ6;Q9NX63;F8WAR4	binding;enzyme binding;phosphatase binding;protein binding;protein complex scaffold;structural molecule activity	DUF737	14	14	14	63.4	63.4	63.4	26.694	0	32.808	951010000	175	25.6381	25.8704	25.8446	25.4468	25.9213	25.6565	25.8708	25.9527	-0.150346	0.593342
Chromodomain-helicase-DNA-binding protein 1	CHD1	O14646-2;O14646;O14647-2;O14647	O14646-2;O14646	adenyl nucleotide binding;adenyl ribonucleotide binding;ATP binding;ATPase activity;ATPase activity, coupled;ATP-dependent DNA helicase activity;ATP-dependent helicase activity;binding;catalytic activity;core promoter binding;core promoter sequence-specific DNA binding;DNA binding;DNA helicase activity;DNA-dependent ATPase activity;helicase activity;histone binding;hydrolase activity;hydrolase ac…	Chromo;DUF4208;Helicase_C;SNF2_N	9	9	9	9.2	9.2	9.2	196.59	0	46.871	89563000	49	22.6065	22.6184	22.3558	22.3785	22.9091	22.7915	22.6305	22.6784	-0.262577	1.49595
Chromodomain-helicase-DNA-binding protein 4	CHD4	F5GWX5;A0A0C4DGG9;Q14839;Q14839-2;Q8TDI0;K7EMY3;F5H6N4;Q12873-2;Q12873;Q12873-3;F2Z2R5;I3L229;H7C3H7;H7C0J3	F5GWX5;A0A0C4DGG9;Q14839;Q14839-2	adenyl nucleotide binding;adenyl ribonucleotide binding;ATP binding;ATPase activity;ATPase activity, coupled;ATP-dependent DNA helicase activity;ATP-dependent helicase activity;binding;catalytic activity;cation binding;DNA binding;DNA helicase activity;DNA-dependent ATPase activity;helicase activity;hydrolase activity;hydrolase activity, acting on acid anhydrides;hydrolase activity, acting on aci…	CHDCT2;CHDNT;Chromo;DUF1086;DUF1087;Helicase_C;PHD;SNF2_N	22	22	22	22.8	22.8	22.8	217.1	0	81.506	316800000	114	24.6182	24.2888	24.1632	24.24	24.4442	24.626	24.5273	24.3325	-0.154921	0.624517
Serine/threonine-protein kinase Chk1	CHEK1	O14757-3;O14757;J3KN87;E7EPP6;O14757-2;E9PKQ3;E9PJI4;E9PQW7;E9PPA5;A0A087WT52;E9PM65;A0A087WY91	O14757-3;O14757;J3KN87;E7EPP6;O14757-2	adenyl nucleotide binding;adenyl ribonucleotide binding;ATP binding;binding;catalytic activity;histone kinase activity;histone kinase activity (H3-T11 specific);histone threonine kinase activity;kinase activity;nucleotide binding;phosphotransferase activity, alcohol group as acceptor;protein kinase activity;protein serine/threonine kinase activity;purine nucleotide binding;purine ribonucleoside t…	Pkinase	12	12	12	44.1	44.1	44.1	50.414	0	70.755	460250000	92	24.9239	25.1155	24.9958	24.4646	24.941	24.8708	24.9241	25.0572	-0.0733309	0.195745
Serine/threonine-protein kinase Chk2	CHEK2	O96017-12;O96017;O96017-9;O96017-7;O96017-8;O96017-4;O96017-13;H0Y820;B7ZBF6;B7ZBF2;H0Y4V6;B7ZBF7;A0A087X102;F8WCV2;B7ZBF8;C9JFD7;O96017-6;O96017-5;O96017-11;O96017-2;O96017-10;O96017-3;Q9C098	O96017-12;O96017;O96017-9;O96017-7;O96017-8;O96017-4;O96017-13;H0Y820;B7ZBF6	adenyl nucleotide binding;adenyl ribonucleotide binding;ATP binding;binding;catalytic activity;cation binding;enzyme binding;identical protein binding;ion binding;kinase activity;kinase binding;metal ion binding;nucleotide binding;phosphotransferase activity, alcohol group as acceptor;protein binding;protein dimerization activity;protein homodimerization activity;protein kinase activity;protein k…	FHA;Pkinase	10	10	10	28.8	28.8	28.8	57.525	0	21.801	212070000	54	23.8994	24.179	23.9362	23.9746	23.9387	23.7058	23.8527	24.0265	0.116374	0.592621
Calcineurin B homologous protein 1	CHP1	Q99653;H0YLY7;H0YKE7;F5GX29;H0YNG9	Q99653	binding;calcium ion binding;calcium-dependent protein binding;cation binding;channel regulator activity;cytoskeletal protein binding;enzyme binding;enzyme inhibitor activity;enzyme regulator activity;ion binding;kinase binding;kinase inhibitor activity;kinase regulator activity;metal ion binding;microtubule binding;potassium channel regulator activity;protein binding;protein kinase inhibitor acti…	EF-hand_1;EF-hand_7	5	5	5	36.9	36.9	36.9	22.456	0	8.3895	69770000	24	22.2999	22.4181	NaN	22.0971	22.7089	22.2797	22.2782	NaN	-0.150564	0.367631
Cold-inducible RNA-binding protein	CIRBP	Q14011;K7EJV1;K7EMY9;K7EPM4;K7EQR7;D6W5Y5;Q14011-2;K7ENX8;K7ELV6;K7EJV5;K7ELT6;K7ER40;K7EQX4;K7ENN6;K7EIF7;K7EQL0;Q14011-3	Q14011;K7EJV1;K7EMY9;K7EPM4;K7EQR7;D6W5Y5;Q14011-2;K7ENX8;K7ELV6;K7EJV5;K7ELT6;K7ER40	binding;mRNA 3'-UTR binding;mRNA binding;nucleic acid binding;nucleotide binding;RNA binding;rRNA binding;SSU rRNA binding;translation regulator activity;translation repressor activity	RRM_1	6	6	6	46.5	46.5	46.5	18.648	0	15	65094000	19	NaN	24.3533	NaN	22.0564	NaN	NaN	21.7538	21.6312	1.51234	0.496143
Creatine kinase B-type	CKB	P12277;G3V4N7;H0YJG0;G3V461;H0YJK0;G3V2I1	P12277;G3V4N7	adenyl nucleotide binding;adenyl ribonucleotide binding;ATP binding;binding;catalytic activity;creatine kinase activity;enzyme binding;kinase activity;nucleotide binding;phosphotransferase activity, nitrogenous group as acceptor;protein binding;purine nucleotide binding;purine ribonucleoside triphosphate binding;purine ribonucleotide binding;ribonucleotide binding;transferase activity;transferase…	ATP-gua_Ptrans;ATP-gua_PtransN	21	21	21	79.5	79.5	79.5	42.644	0	152.49	661580000	126	25.8573	24.4728	24.598	26.9481	25.0939	23.7545	25.034	24.5089	0.871215	0.627703
Chloride intracellular channel protein 1	CLIC1	O00299	O00299	anion channel activity;anion transmembrane transporter activity;channel activity;chloride channel activity;gated channel activity;ion channel activity;ion transmembrane transporter activity;passive transmembrane transporter activity;substrate-specific channel activity;substrate-specific transmembrane transporter activity;substrate-specific transporter activity;transmembrane transporter activity;t…	GST_N_2	9	9	9	55.6	55.6	55.6	26.922	0	27.609	120670000	59	23.1061	22.2644	NaN	24.4331	NaN	NaN	22.9157	22.3008	0.659621	0.307435
Dual specificity protein kinase CLK1	CLK1	P49759;P49759-3;B8ZZR0;F8WBF5;A0A087WVK0;B7ZL31;A0A087WX74;Q9HAZ1	P49759;P49759-3;B8ZZR0;F8WBF5;A0A087WVK0	adenyl nucleotide binding;adenyl ribonucleotide binding;ATP binding;binding;catalytic activity;kinase activity;non-membrane spanning protein tyrosine kinase activity;nucleotide binding;phosphotransferase activity, alcohol group as acceptor;protein kinase activity;protein serine/threonine kinase activity;protein serine/threonine/tyrosine kinase activity;protein tyrosine kinase activity;purine nucl…	Pkinase	4	4	4	7.6	7.6	7.6	57.29	0	3.6719	46685000	17	21.2996	21.8053	21.7682	21.4627	21.4315	21.8773	22.2507	21.5966	-0.205025	0.419156
Dual specificity protein kinase CLK2	CLK2	B1AVT0;P49760-3;P49760	B1AVT0;P49760-3;P49760	adenyl nucleotide binding;adenyl ribonucleotide binding;ATP binding;binding;catalytic activity;kinase activity;nucleotide binding;phosphotransferase activity, alcohol group as acceptor;protein kinase activity;protein serine/threonine kinase activity;protein serine/threonine/tyrosine kinase activity;protein tyrosine kinase activity;purine nucleotide binding;purine ribonucleoside triphosphate bindi…	Pkinase	8	8	8	19.1	19.1	19.1	59.874	0	36.624	478390000	85	24.6253	24.991	25.1774	24.6617	24.7029	24.6958	24.1565	24.6274	0.318158	0.857004
Dual specificity protein kinase CLK3	CLK3	P49761-1;P49761;P49761-3;H3BQG1;H3BRE4;H3BUL5;H3BVF8;H3BNQ5;H3BNC8;H3BRW2	P49761-1;P49761;P49761-3	adenyl nucleotide binding;adenyl ribonucleotide binding;ATP binding;binding;catalytic activity;kinase activity;nucleotide binding;phosphotransferase activity, alcohol group as acceptor;protein kinase activity;protein serine/threonine kinase activity;protein serine/threonine/tyrosine kinase activity;protein tyrosine kinase activity;purine nucleotide binding;purine ribonucleoside triphosphate bindi…	Pkinase	9	9	9	26.3	26.3	26.3	58.588	0	26.842	278630000	50	24.0961	24.3033	24.1451	23.7666	24.2302	24.0861	24.0232	24.072	-0.0251074	0.0742812
Clathrin heavy chain;Clathrin heavy chain 1	CLTC	A0A087WVQ6;Q00610-2;Q00610;J3KS13;J3QL20;J3KSQ2	A0A087WVQ6;Q00610-2;Q00610	binding;clathrin binding;clathrin light chain binding;double-stranded RNA binding;enzyme binding;kinase binding;nucleic acid binding;protein binding;protein kinase binding;RNA binding;structural molecule activity	Clathrin;Clathrin_propel;Clathrin-link	7	7	7	7.8	7.8	7.8	192.06	0	28.118	148840000	49	23.0583	23.0396	22.9432	23.4887	23.046	22.9591	23.335	22.8364	0.0883512	0.219393
Catechol O-methyltransferase	COMT	F8WBW9;E7EMS6;E7EUU8;P21964-2;P21964	F8WBW9;E7EMS6;E7EUU8;P21964-2;P21964	binding;catalytic activity;catechol O-methyltransferase activity;cation binding;ion binding;magnesium ion binding;metal ion binding;methyltransferase activity;O-methyltransferase activity;S-adenosylmethionine-dependent methyltransferase activity;transferase activity;transferase activity, transferring one-carbon groups	Methyltransf_3	2	2	2	21.6	21.6	21.6	21.811	0.00082781	2.8682	11736000	7	NaN	NaN	20.7894	21.1882	NaN	NaN	NaN	NaN	NaN	0
Coatomer subunit alpha;Xenin;Proxenin	COPA	P53621;P53621-2	P53621;P53621-2	structural molecule activity	Coatomer_WDAD;COPI_C;WD40	5	5	5	8	8	8	138.34	0	10.802	45444000	23	21.9476	NaN	21.6015	22.1529	NaN	NaN	21.7888	NaN	0.111888	0
Coatomer subunit gamma-2	COPG2	Q9UBF2;Q9UBF2-2	Q9UBF2;Q9UBF2-2	structural molecule activity	Adaptin_N;COP-gamma_platf	5	5	5	12.2	12.2	12.2	97.621	0	40.285	86309000	52	22.0405	22.3123	21.7402	21.7753	22.3628	21.8813	22.224	22.4666	-0.266569	0.702367
Cytochrome c oxidase subunit 4 isoform 1, mitochondrial	COX4I1	P13073;H3BPG0	P13073;H3BPG0	catalytic activity;cation transmembrane transporter activity;cytochrome-c oxidase activity;heme-copper terminal oxidase activity;hydrogen ion transmembrane transporter activity;inorganic cation transmembrane transporter activity;ion transmembrane transporter activity;monovalent inorganic cation transmembrane transporter activity;oxidoreductase activity;oxidoreductase activity, acting on a heme gr…	COX4	2	2	2	16.6	16.6	16.6	19.576	0.0007716	2.2819	38372000	13	NaN	NaN	21.8947	22.0386	NaN	NaN	21.7777	NaN	0.188928	0
Cytochrome c oxidase subunit 5A, mitochondrial	COX5A	H3BNX8;P20674;H3BRI0	H3BNX8;P20674;H3BRI0	binding;catalytic activity;cation binding;cation transmembrane transporter activity;cytochrome-c oxidase activity;electron carrier activity;heme-copper terminal oxidase activity;hydrogen ion transmembrane transporter activity;inorganic cation transmembrane transporter activity;ion binding;ion transmembrane transporter activity;metal ion binding;monovalent inorganic cation transmembrane transporte…	COX5A	2	2	2	20.9	20.9	20.9	17.235	0	4.6398	123430000	15	23.1801	22.4763	22.6304	23.3069	22.8654	22.3501	22.9919	22.6947	0.172922	0.293182
Cytochrome c oxidase subunit 6A1, mitochondrial	COX6A1	H0YIV9;P12074	H0YIV9;P12074	catalytic activity;cation transmembrane transporter activity;cytochrome-c oxidase activity;heme-copper terminal oxidase activity;hydrogen ion transmembrane transporter activity;inorganic cation transmembrane transporter activity;ion transmembrane transporter activity;monovalent inorganic cation transmembrane transporter activity;oxidoreductase activity;oxidoreductase activity, acting on a heme gr…	COX6A;Glu-tRNAGln	1	1	1	12.5	12.5	12.5	18.606	0	15.922	59544000	44	22.0654	22.001	NaN	NaN	NaN	21.8105	NaN	21.6686	0.293642	1.19575
Cytochrome c oxidase subunit 6B1	COX6B1	P14854	P14854	catalytic activity;cation transmembrane transporter activity;cytochrome-c oxidase activity;heme-copper terminal oxidase activity;hydrogen ion transmembrane transporter activity;inorganic cation transmembrane transporter activity;ion transmembrane transporter activity;monovalent inorganic cation transmembrane transporter activity;oxidoreductase activity;oxidoreductase activity, acting on a heme gr…	COX6B	3	3	3	58.1	58.1	58.1	10.192	0	7.2049	55794000	10	22.3905	NaN	NaN	23.7785	22.0652	NaN	21.8553	NaN	1.12421	0.601388
Cytochrome c oxidase subunit 7A2, mitochondrial	COX7A2	H0UI06;P14406;D6RIE3;D6RGV5;D6R9C3	H0UI06;P14406;D6RIE3;D6RGV5;D6R9C3	catalytic activity;cation transmembrane transporter activity;cytochrome-c oxidase activity;heme-copper terminal oxidase activity;hydrogen ion transmembrane transporter activity;inorganic cation transmembrane transporter activity;ion transmembrane transporter activity;monovalent inorganic cation transmembrane transporter activity;oxidoreductase activity;oxidoreductase activity, acting on a heme gr…	COX7a	4	4	4	40.9	40.9	40.9	12.844	0	4.4093	85221000	8	NaN	21.5132	NaN	22.9687	NaN	22.1499	21.7381	NaN	0.297018	0.13523
Cytochrome c oxidase subunit 7C, mitochondrial	COX7C	P15954;D6R9Z7	P15954;D6R9Z7	catalytic activity;cation transmembrane transporter activity;cytochrome-c oxidase activity;heme-copper terminal oxidase activity;hydrogen ion transmembrane transporter activity;inorganic cation transmembrane transporter activity;ion transmembrane transporter activity;monovalent inorganic cation transmembrane transporter activity;oxidoreductase activity;oxidoreductase activity, acting on a heme gr…	COX7C	2	2	2	50.8	50.8	50.8	7.2454	0	7.7478	53045000	32	22.1551	21.3947	21.5363	22.4747	22.1772	21.0765	22.1755	21.8821	0.0624013	0.0606591
Copine-3	CPNE3	O75131;A0A087WUS8;A0A087WXR6;E5RHZ0;A0A087WYQ3;H0YB26;E5RFT7	O75131;A0A087WUS8;A0A087WXR6;E5RHZ0;A0A087WYQ3;H0YB26	binding;calcium-dependent phospholipid binding;catalytic activity;kinase activity;lipid binding;phospholipid binding;phosphotransferase activity, alcohol group as acceptor;protein kinase activity;protein serine/threonine kinase activity;transferase activity;transferase activity, transferring phosphorus-containing groups;transporter activity	C2;Copine	6	6	6	20.1	20.1	20.1	60.13	0	20.263	25911000	16	NaN	22.3657	NaN	21.8644	NaN	NaN	NaN	NaN	NaN	0
Oxygen-dependent coproporphyrinogen-III oxidase, mitochondrial	CPOX	P36551;P36551-2;H0YA22;D6RER6	P36551;P36551-2	binding;catalytic activity;coproporphyrinogen oxidase activity;identical protein binding;oxidoreductase activity;oxidoreductase activity, acting on the CH-CH group of donors;oxidoreductase activity, acting on the CH-CH group of donors, oxygen as acceptor;protein binding;protein dimerization activity;protein homodimerization activity;structural constituent of eye lens;structural molecule activity	Coprogen_oxidas	7	7	7	25.1	25.1	25.1	50.151	0	18.625	59913000	27	22.0797	21.8721	NaN	22.9039	21.748	NaN	NaN	21.9167	0.452846	0.453943
Cleavage and polyadenylation specificity factor subunit 6	CPSF6	F8WJN3;Q16630-3;Q16630;Q16630-2	F8WJN3;Q16630-3;Q16630;Q16630-2	binding;mRNA binding;nucleic acid binding;nucleotide binding;RNA binding		2	2	2	8.6	8.6	8.6	52.269	0	14.367	32260000	34	21.1083	NaN	20.8672	21.5756	21.0233	NaN	NaN	20.3655	0.489317	0.567055
Exportin-2	CSE1L	P55060;P55060-4;P55060-3;P55060-2	P55060;P55060-4;P55060-3	binding;importin-alpha export receptor activity;nuclear export signal receptor activity;protein binding;protein transporter activity;substrate-specific transporter activity;transporter activity	CAS_CSE1;Cse1;IBN_N	18	18	18	28.7	28.7	28.7	110.42	0	119.45	2245000000	355	26.7387	26.9547	26.9202	26.5951	27.1458	26.8275	27.1762	26.9636	-0.226077	0.993205
Tyrosine-protein kinase CSK	CSK	P41240;H3BUM9;H3BN15;H3BU69;K7ENL8;K7ES68;K7EQY5;A0A087WUR1;P42679-3;P42679;P42679-2	P41240	adenyl nucleotide binding;adenyl ribonucleotide binding;ATP binding;binding;catalytic activity;identical protein binding;kinase activity;non-membrane spanning protein tyrosine kinase activity;nucleotide binding;phosphotransferase activity, alcohol group as acceptor;protein binding;protein C-terminus binding;protein kinase activity;protein tyrosine kinase activity;purine nucleotide binding;purine …	Pkinase_Tyr;SH2;SH3_1	41	41	41	83.6	83.6	83.6	50.704	0	300.11	4447400000	688	28.1824	28.2226	28.1368	27.8856	28.1341	28.0523	28.1141	28.2395	-0.0281382	0.123516
Casein kinase I isoform alpha	CSNK1A1	P48729-3;P48729;P48729-2;D6REM4;E7ETM0;E5RG27;D6RGE5;Q8N752;H0Y9X2;U3KQK7;U3KPX3	P48729-3;P48729;P48729-2;D6REM4;E7ETM0	adenyl nucleotide binding;adenyl ribonucleotide binding;ATP binding;binding;catalytic activity;kinase activity;nucleotide binding;phosphotransferase activity, alcohol group as acceptor;protein kinase activity;protein serine/threonine kinase activity;purine nucleotide binding;purine ribonucleoside triphosphate binding;purine ribonucleotide binding;ribonucleotide binding;transferase activity;transf…	Pkinase	18	18	18	69.5	69.5	69.5	37.567	0	64.66	1068000000	167	26.1454	26.1711	26.0118	25.578	26.0903	25.767	25.9158	26.1405	-0.00181437	0.00374564
Casein kinase I isoform delta;Casein kinase I isoform epsilon	CSNK1D;CSNK1E	P48730-2;H7BYT1;P48730;B0QY36;B0QY35;B0QY34;P49674;J3QQI9;H0Y645;H0Y2N6;B4DLF1;J3KRM8	P48730-2;H7BYT1;P48730;B0QY36;B0QY35;B0QY34;P49674;J3QQI9;H0Y645	adenyl nucleotide binding;adenyl ribonucleotide binding;ATP binding;binding;catalytic activity;kinase activity;nucleotide binding;peptide binding;phosphotransferase activity, alcohol group as acceptor;protein kinase activity;protein serine/threonine kinase activity;purine nucleotide binding;purine ribonucleoside triphosphate binding;purine ribonucleotide binding;ribonucleotide binding;tau-protein…	Pkinase	16	16	16	57.2	57.2	57.2	46.832	0	89.814	649790000	149	25.2491	25.4162	25.3455	25.0029	25.3673	25.207	25.2355	25.2418	-0.00948286	0.0337079
Casein kinase II subunit alpha;Casein kinase II subunit alpha 3	CSNK2A1;CSNK2A3	E7EU96;Q5U5J2;P68400;Q8NEV1;P68400-2;A0A087WY74;V9GYA2;V9GY80;V9GYW6	E7EU96;Q5U5J2;P68400;Q8NEV1;P68400-2	adenyl nucleotide binding;adenyl ribonucleotide binding;ATP binding;binding;catalytic activity;heat shock protein binding;Hsp90 protein binding;kinase activity;nucleotide binding;phosphotransferase activity, alcohol group as acceptor;protein binding;protein kinase activity;protein N-terminus binding;protein serine/threonine kinase activity;purine nucleotide binding;purine ribonucleoside triphosph…	Pkinase	53	53	53	72.7	72.7	72.7	45.31	0	323.31	56154000000	1785	31.9379	32.0739	32.0518	31.6105	31.7171	32.1086	31.6606	32.0378	0.0375175	0.0877648
Casein kinase II subunit alpha	CSNK2A2	P19784;H3BSA1;H3BV19;H3BNI9	P19784;H3BSA1	adenyl nucleotide binding;adenyl ribonucleotide binding;ATP binding;binding;catalytic activity;kinase activity;nucleotide binding;phosphotransferase activity, alcohol group as acceptor;protein binding;protein kinase activity;protein N-terminus binding;protein serine/threonine kinase activity;purine nucleotide binding;purine ribonucleoside triphosphate binding;purine ribonucleotide binding;ribonuc…	Pkinase	55	55	55	83.7	83.7	83.7	41.213	0	323.31	34984000000	1680	31.2857	31.2827	31.3507	30.8237	31.1034	31.2944	30.9461	31.3054	0.0233479	0.0552767
Casein kinase II subunit beta	CSNK2B;CSNK2B-LY6G5B-1181	P67870;Q5SRQ6;Q5SRQ3;N0E472;A0A0G2JM12;N0E644;A0A0G2JM58	P67870;Q5SRQ6;Q5SRQ3	binding;catalytic activity;cation binding;chromatin binding;enzyme regulator activity;identical protein binding;ion binding;kinase activity;kinase regulator activity;metal ion binding;protein binding;protein domain specific binding;protein kinase regulator activity;receptor binding;transcription factor binding;transferase activity;transferase activity, transferring phosphorus-containing groups	CK_II_beta	26	26	26	99.5	99.5	99.5	24.942	0	323.31	84993000000	1438	32.4904	32.4096	32.4198	32.1664	32.3957	32.3442	32.1713	32.2899	0.0712709	0.359954
Cystatin-B	CSTB	P04080	P04080	binding;cysteine-type endopeptidase inhibitor activity;endopeptidase inhibitor activity;endopeptidase regulator activity;enzyme binding;enzyme inhibitor activity;enzyme regulator activity;peptidase inhibitor activity;peptidase regulator activity;protease binding;protein binding	Cystatin	5	5	5	76.5	76.5	76.5	11.139	0	34.919	430100000	76	24.4666	24.7236	24.6584	24.8872	24.4606	24.2762	24.5966	24.4127	0.247429	1.193
CTP synthase 1	CTPS1	P17812;P17812-2;Q9NRF8	P17812	adenyl nucleotide binding;adenyl ribonucleotide binding;ATP binding;binding;catalytic activity;CTP synthase activity;ligase activity;ligase activity, forming carbon-nitrogen bonds;nucleotide binding;purine nucleotide binding;purine ribonucleoside triphosphate binding;purine ribonucleotide binding;ribonucleotide binding	CTP_synth_N;GATase	8	8	8	20.8	20.8	20.8	66.69	0	12.864	216600000	48	23.7999	23.8168	23.6648	23.6108	23.7512	23.5365	23.7046	23.3257	0.143575	0.628589
Cytochrome c	CYCS	C9JFR7;P99999	C9JFR7;P99999	binding;cation binding;electron carrier activity;electron transporter, transferring electrons from CoQH2-cytochrome c reductase complex and cytochrome c oxidase complex activity;heme binding;ion binding;iron ion binding;metal ion binding;tetrapyrrole binding;transition metal ion binding	Cytochrom_C	4	4	4	40.6	40.6	40.6	11.333	0	14.211	29862000	17	21.2036	NaN	NaN	22.9479	21.3081	20.9382	NaN	NaN	0.952595	0.401017
DAZ-associated protein 1	DAZAP1	K7EQ02;K7EQ55;K7EK33;Q96EP5-2;Q96EP5	K7EQ02;K7EQ55;K7EK33;Q96EP5-2;Q96EP5	binding;nucleic acid binding;nucleotide binding;RNA binding;RNA stem-loop binding	RRM_1	2	2	2	13.1	13.1	13.1	35.02	0	4.9865	12438000	4	NaN	21.8942	NaN	21.9406	NaN	NaN	NaN	NaN	NaN	0
Acyl-CoA-binding protein	DBI	B8ZWD1;A0A0A0MTI5;P07108;P07108-3;P07108-2;P07108-4;P07108-5;P07108-6	B8ZWD1;A0A0A0MTI5;P07108;P07108-3;P07108-2;P07108-4;P07108-5;P07108-6	benzodiazepine receptor binding;binding;carboxylic acid binding;coenzyme binding;cofactor binding;fatty acid binding;fatty-acyl-CoA binding;lipid binding;monocarboxylic acid binding;protein binding;protein dimerization activity;receptor binding	ACBP	2	2	2	37.1	37.1	37.1	11.15	0	4.4317	32743000	2	21.83	NaN	NaN	23.3314	NaN	NaN	21.5282	NaN	1.05248	0
DDB1- and CUL4-associated factor 7	DCAF7	P61962;A0A087WWI6;P61962-2	P61962		WD40	17	17	17	52.6	52.6	52.6	38.926	0	84.544	1226600000	227	26.4106	26.5711	26.4716	26.2778	26.684	26.3425	26.3927	26.4069	-0.0237417	0.0874712
Dermcidin;Survival-promoting peptide;DCD-1	DCD	P81605;P81605-2	P81605;P81605-2	catalytic activity;hydrolase activity;peptidase activity	Dermcidin	6	6	6	35.5	35.5	35.5	11.284	0	18.07	128870000	29	22.1093	22.1928	22.7289	21.0739	22.4896	22.1118	21.6292	22.7716	-0.224341	0.209934
DNA damage-binding protein 1	DDB1	F5GY55;Q16531;F5H775;F5H581;F5H6C5;F5H238	F5GY55;Q16531;F5H775;F5H581;F5H6C5;F5H238	binding;damaged DNA binding;DNA binding;nucleic acid binding	CPSF_A	2	2	2	3.8	3.8	3.8	121.71	0	4.9076	16819000	8	20.6056	NaN	NaN	20.9538	NaN	NaN	NaN	NaN	NaN	0
Dolichyl-diphosphooligosaccharide--protein glycosyltransferase 48 kDa subunit	DDOST	A0A0C4DGS1;P39656-3;P39656;P39656-2;U3KQ84	A0A0C4DGS1;P39656-3;P39656;P39656-2;U3KQ84	catalytic activity;dolichyl-diphosphooligosaccharide-protein glycotransferase activity;oligosaccharyl transferase activity;transferase activity;transferase activity, transferring glycosyl groups;transferase activity, transferring hexosyl groups	DDOST_48kD	7	7	7	32.1	32.1	32.1	48.799	0	10.712	101690000	25	22.3991	22.5354	22.7748	23.0656	22.773	22.0509	22.634	22.113	0.301032	0.611
Epithelial discoidin domain-containing receptor 1	DDR1	Q08345-2;Q08345-6;Q08345;Q08345-5;A0A0G2JNZ7;A0A0A0MSX3;E7ERI6;E7ETI3;A0A0G2JIA2;E7EPN2;E7EUP7;A2ABL2;A0A0G2JIZ7;E7EQ30;E7EPH4;A0A0G2JI85;Q08345-4;A2ABM8;E7ETX3;E7EUD5;E7EVW6;E7ERN0;A0A0G2JHK4;E7ESR9;A2ABL0;H0YAH6;E7EVT1;E7ES06;H0Y717;E7EN94;H0Y9F4;A0A0G2JJA0;E7EQ23;E7EX99;E7EXB0;E7ENJ2	Q08345-2;Q08345-6;Q08345;Q08345-5;A0A0G2JNZ7;A0A0A0MSX3;E7ERI6;E7ETI3;A0A0G2JIA2;E7EPN2;E7EUP7;A2ABL2;A0A0G2JIZ7;E7EQ30;E7EPH4;A0A0G2JI85;Q08345-4	adenyl nucleotide binding;adenyl ribonucleotide binding;ATP binding;binding;catalytic activity;cation binding;collagen binding;ion binding;kinase activity;metal ion binding;molecular transducer activity;nucleotide binding;phosphotransferase activity, alcohol group as acceptor;protein binding;protein kinase activity;protein tyrosine kinase activity;purine nucleotide binding;purine ribonucleoside t…	F5_F8_type_C;Pkinase_Tyr	14	14	14	21.5	21.5	21.5	97.173	0	98.979	400590000	121	24.6632	24.873	24.5668	24.3106	24.6727	24.6959	24.4112	24.6183	0.0038662	0.00973532
ATP-dependent RNA helicase DDX18	DDX18	Q9NVP1;H7C452	Q9NVP1;H7C452	adenyl nucleotide binding;adenyl ribonucleotide binding;ATP binding;ATPase activity;ATPase activity, coupled;ATP-dependent helicase activity;ATP-dependent RNA helicase activity;binding;catalytic activity;helicase activity;hydrolase activity;hydrolase activity, acting on acid anhydrides;hydrolase activity, acting on acid anhydrides, in phosphorus-containing anhydrides;nucleic acid binding;nucleosi…	DEAD;DUF4217;Helicase_C	4	4	4	10.6	10.6	10.6	75.406	0	5.1856	26517000	7	NaN	20.9708	21.0055	NaN	NaN	21.5375	NaN	21.4717	-0.516488	2.2891
Nucleolar RNA helicase 2	DDX21	Q9NR30-2;Q9NR30	Q9NR30-2;Q9NR30	adenyl nucleotide binding;adenyl ribonucleotide binding;ATP binding;ATPase activity;ATPase activity, coupled;ATP-dependent helicase activity;ATP-dependent RNA helicase activity;binding;catalytic activity;double-stranded RNA binding;helicase activity;hydrolase activity;hydrolase activity, acting on acid anhydrides;hydrolase activity, acting on acid anhydrides, in phosphorus-containing anhydrides;n…	DEAD;GUCT;Helicase_C	10	10	10	23.5	23.5	23.5	79.656	0	32.909	116870000	54	22.1964	22.001	22.5095	22.1756	21.7657	23.6069	22.5761	22.103	-0.292343	0.29495
ATP-dependent RNA helicase DDX3X;ATP-dependent RNA helicase DDX3Y	DDX3X;DDX3Y	A0A0D9SFB3;A0A0D9SG12;A0A0D9SF53;O00571;O00571-2;O15523-2;O15523;A0A087WVZ1;C9J081;D6RCM4;O15523-3;Q9NQI0-3;Q9NQI0-2;Q9NQI0-4;Q9NQI0;A0A087WX09;B4DLA0;C9J8G5;H0Y960	A0A0D9SFB3;A0A0D9SG12;A0A0D9SF53;O00571;O00571-2;O15523-2;O15523	adenyl nucleotide binding;adenyl ribonucleotide binding;ATP binding;ATPase activity;ATPase activity, coupled;ATP-dependent DNA helicase activity;ATP-dependent helicase activity;ATP-dependent RNA helicase activity;binding;catalytic activity;CTPase activity;DNA binding;DNA helicase activity;DNA-dependent ATPase activity;eukaryotic initiation factor 4E binding;GTPase activity;helicase activity;hydro…	DEAD;Helicase_C	18	18	17	35.3	35.3	33.6	70.839	0	58.103	319960000	145	23.7458	24.6253	24.2054	24.3315	23.9396	23.9704	24.0046	23.8942	0.274794	0.728554
Probable ATP-dependent RNA helicase DDX41	DDX41	J3KNN5;Q9UJV9;H0Y8L8;H0YA06;D6RGI7	J3KNN5;Q9UJV9	adenyl nucleotide binding;adenyl ribonucleotide binding;ATP binding;ATPase activity;ATPase activity, coupled;ATP-dependent helicase activity;ATP-dependent RNA helicase activity;binding;catalytic activity;cation binding;DNA binding;helicase activity;hydrolase activity;hydrolase activity, acting on acid anhydrides;hydrolase activity, acting on acid anhydrides, in phosphorus-containing anhydrides;io…	DEAD;Helicase_C	13	13	13	26.7	26.7	26.7	71.648	0	30.321	394940000	114	24.6536	24.6649	24.7266	24.4502	24.6698	24.7691	24.476	24.6431	-0.0156932	0.0652786
Probable ATP-dependent RNA helicase DDX46	DDX46	A0A0C4DG89;Q7L014;D6RJA6	A0A0C4DG89;Q7L014;D6RJA6	adenyl nucleotide binding;adenyl ribonucleotide binding;ATP binding;ATPase activity;ATPase activity, coupled;ATP-dependent helicase activity;ATP-dependent RNA helicase activity;binding;catalytic activity;helicase activity;hydrolase activity;hydrolase activity, acting on acid anhydrides;hydrolase activity, acting on acid anhydrides, in phosphorus-containing anhydrides;nucleic acid binding;nucleosi…	DEAD;Helicase_C	7	7	7	10.2	10.2	10.2	117.46	0	12.853	57089000	10	NaN	22.5654	NaN	21.8422	21.7273	NaN	NaN	NaN	0.47646	0
Probable ATP-dependent RNA helicase DDX5	DDX5	J3KTA4;P17844-2;P17844;J3QSF1;J3KRZ1;X6RLV5;J3QR02;J3KRX8;J3QRQ7	J3KTA4;P17844-2;P17844;J3QSF1	adenyl nucleotide binding;adenyl ribonucleotide binding;androgen receptor binding;ATP binding;ATPase activity;ATPase activity, coupled;ATP-dependent helicase activity;ATP-dependent RNA helicase activity;binding;catalytic activity;estrogen receptor binding;helicase activity;hormone receptor binding;hydrolase activity;hydrolase activity, acting on acid anhydrides;hydrolase activity, acting on acid …	DEAD;Helicase_C;P68HR	9	8	6	18.4	18.4	13.2	69.086	0	6.96	55019000	25	NaN	21.9781	21.8083	NaN	NaN	21.8266	21.7642	21.7448	0.114685	0.690756
Protein DEK	DEK	P35659;B4DFG0;P35659-2;D6R9L5;D6RDA2;H0Y993;H0Y8X0	P35659;B4DFG0;P35659-2	binding;DNA binding;histone binding;nucleic acid binding;protein binding	DEK_C;SAP	19	19	19	34.1	34.1	34.1	42.674	0	60.723	2508400000	260	27.4885	27.41	27.6392	27.5895	27.5968	27.2991	27.1477	27.4138	0.16742	0.766643
Derlin-2	DERL2	I3L1T3;Q9GZP9	I3L1T3;Q9GZP9		DER1	2	2	2	20.9	20.9	20.9	18.038	0	31.682	200990000	36	NaN	23.9639	23.7553	23.0365	23.372	23.3983	23.4086	23.6111	0.13776	0.224343
Delta(24)-sterol reductase	DHCR24;Nbla03646	Q15392-2;Q15392;Q3LIE7;H7C4B7	Q15392-2;Q15392;Q3LIE7	antigen binding;binding;catalytic activity;coenzyme binding;cofactor binding;delta24(24-1) sterol reductase activity;delta24-sterol reductase activity;enzyme binding;flavin adenine dinucleotide binding;oxidoreductase activity;oxidoreductase activity, acting on CH-OH group of donors;oxidoreductase activity, acting on the CH-CH group of donors;oxidoreductase activity, acting on the CH-CH group of d…	FAD_binding_4	9	9	9	24.6	24.6	24.6	54.75	0	17.865	321930000	66	23.6203	24.3496	24.1678	23.6906	24.4531	24.3481	24.4936	24.0747	-0.385273	0.978307
7-dehydrocholesterol reductase	DHCR7	Q9UBM7;H0YE57	Q9UBM7;H0YE57	7-dehydrocholesterol reductase activity;catalytic activity;oxidoreductase activity;oxidoreductase activity, acting on the CH-CH group of donors;oxidoreductase activity, acting on the CH-CH group of donors, NAD or NADP as acceptor	ERG4_ERG24	3	3	3	6.3	6.3	6.3	54.489	0	3.2297	64579000	17	21.7626	22.5532	22.0693	21.9785	21.4796	NaN	21.9112	21.9904	0.297141	0.573105
Pre-mRNA-splicing factor ATP-dependent RNA helicase DHX15	DHX15	O43143	O43143	adenyl nucleotide binding;adenyl ribonucleotide binding;ATP binding;ATPase activity;ATPase activity, coupled;ATP-dependent helicase activity;ATP-dependent RNA helicase activity;binding;catalytic activity;double-stranded RNA binding;helicase activity;hydrolase activity;hydrolase activity, acting on acid anhydrides;hydrolase activity, acting on acid anhydrides, in phosphorus-containing anhydrides;n…	DEAD;HA2;Helicase_C;OB_NTP_bind	6	6	6	9.9	9.9	9.9	90.932	0	6.1786	72961000	31	21.7177	21.8923	22.0739	21.6582	NaN	22.739	22.4968	22.1773	-0.635504	1.81743
Acetyltransferase component of pyruvate dehydrogenase complex;Dihydrolipoyllysine-residue acetyltransferase component of pyruvate dehydrogenase complex, mitochondrial	DLAT	H0YDD4;P10515;E9PEJ4	H0YDD4;P10515;E9PEJ4	acetyltransferase activity;catalytic activity;dihydrolipoamide S-acyltransferase activity;dihydrolipoyllysine-residue acetyltransferase activity;S-acetyltransferase activity;S-acyltransferase activity;transferase activity;transferase activity, transferring acyl groups;transferase activity, transferring acyl groups other than amino-acyl groups	2-oxoacid_dh;Biotin_lipoyl;E3_binding	3	3	3	9.8	9.8	9.8	51.201	0	4.6821	45278000	23	21.6548	21.8239	21.03	22.0886	NaN	NaN	21.3819	NaN	0.267427	0
DnaJ homolog subfamily A member 1	DNAJA1	P31689;P31689-2	P31689;P31689-2	adenyl nucleotide binding;adenyl ribonucleotide binding;ATP binding;binding;C3HC4-type RING finger domain binding;cation binding;chaperone binding;enzyme binding;G-protein-coupled receptor binding;heat shock protein binding;Hsp70 protein binding;ion binding;lipoprotein particle receptor binding;low-density lipoprotein particle receptor binding;metal ion binding;nucleotide binding;protein binding;…	CTDII;DnaJ;DnaJ_CXXCXGXG	4	4	4	20.4	20.4	20.4	44.868	0	6.3638	42487000	25	NaN	NaN	21.4636	21.8442	21.784	NaN	NaN	NaN	-0.130057	0
Dolichol-phosphate mannosyltransferase subunit 1	DPM1	Q5QPK2;O60762;H0Y368;Q5QPJ9	Q5QPK2;O60762;H0Y368;Q5QPJ9	alcohol binding;binding;carbohydrate binding;catalytic activity;dolichyl-phosphate beta-D-mannosyltransferase activity;dolichyl-phosphate-mannose-protein mannosyltransferase activity;mannose binding;mannosyltransferase activity;monosaccharide binding;sugar binding;transferase activity;transferase activity, transferring glycosyl groups;transferase activity, transferring hexosyl groups	Glycos_transf_2	7	7	7	44.9	44.9	44.9	32.426	0	14.223	118700000	30	22.6301	23.1284	22.6831	22.2462	23.0562	22.4363	23.2208	22.8941	-0.229908	0.410735
Probable C-mannosyltransferase DPY19L1	DPY19L1	Q2PZI1;Q2PZI1-2;H7C3M5	Q2PZI1;Q2PZI1-2	catalytic activity;mannosyltransferase activity;transferase activity;transferase activity, transferring glycosyl groups;transferase activity, transferring hexosyl groups	Dpy19	8	8	8	16	16	16	77.318	0	12.16	292940000	58	23.795	24.0365	23.9502	23.2249	24.3695	23.9132	24.1203	24.3026	-0.424757	1.05196
Protein dpy-30 homolog	DPY30	Q9C005	Q9C005	binding;identical protein binding;protein binding;protein dimerization activity;protein homodimerization activity	Dpy-30	3	3	3	65.7	65.7	65.7	11.25	0	15.372	29332000	29	NaN	NaN	20.3738	21.3522	19.7863	20.0303	NaN	20.5977	0.724925	0.643529
Desmocollin-1	DSC1	Q08554-2;Q08554	Q08554-2;Q08554	binding;calcium ion binding;cation binding;ion binding;metal ion binding	Cadherin;Cadherin_C;Cadherin_pro	3	3	3	7.6	7.6	7.6	93.834	0	5.3198	47699000	8	NaN	21.9733	21.6032	NaN	NaN	21.5266	21.9823	NaN	0.0337677	0.0367252
Desmoplakin	DSP	P15924;P15924-2;P15924-3	P15924;P15924-2;P15924-3	binding;binding, bridging;enzyme binding;kinase binding;protein binding;protein binding, bridging;protein kinase binding;protein kinase C binding;scaffold protein binding;structural constituent of cytoskeleton;structural molecule activity	Plectin	29	29	29	13.9	13.9	13.9	331.77	0	74.085	190870000	115	22.0809	22.9401	23.7461	24.2623	22.1402	23.4016	22.918	23.2141	0.338883	0.250268
Destrin	DSTN	P60981;F6RFD5;P60981-2	P60981;F6RFD5;P60981-2		Cofilin_ADF	7	7	7	41.8	41.8	41.8	18.506	0	23.173	105790000	43	22.8483	22.5499	22.5755	23.2864	22.6711	NaN	22.1863	22.4023	0.395141	0.818253
Cytoplasmic dynein 1 heavy chain 1	DYNC1H1	Q14204	Q14204	adenyl nucleotide binding;adenyl ribonucleotide binding;ATP binding;ATPase activity;binding;catalytic activity;hydrolase activity;hydrolase activity, acting on acid anhydrides;hydrolase activity, acting on acid anhydrides, in phosphorus-containing anhydrides;microtubule motor activity;motor activity;nucleoside-triphosphatase activity;nucleotide binding;purine nucleotide binding;purine ribonucleos…	AAA_5;AAA_8;DHC_N1;DHC_N2;Dynein_heavy;MT	10	10	10	4.1	4.1	4.1	532.4	0	15.805	96836000	21	22.5463	NaN	22.3818	22.7022	NaN	22.534	22.6003	22.4644	0.0105394	0.0355031
Dynein light chain 1, cytoplasmic	DYNLL1	P63167;F8VXL2;F8VRV5;F8VXI7	P63167	catalytic activity;enzyme regulator activity;hydrolase activity;hydrolase activity, acting on acid anhydrides;hydrolase activity, acting on acid anhydrides, in phosphorus-containing anhydrides;motor activity;nitric-oxide synthase regulator activity;nucleoside-triphosphatase activity;pyrophosphatase activity	Dynein_light	9	9	4	92.1	92.1	43.8	10.366	0	136.89	3491300000	327	27.8903	27.5587	27.748	27.2672	27.6821	27.6708	27.4501	27.8371	-0.0439982	0.103502
Dynein light chain 2, cytoplasmic	DYNLL2	Q96FJ2	Q96FJ2	catalytic activity;hydrolase activity;hydrolase activity, acting on acid anhydrides;hydrolase activity, acting on acid anhydrides, in phosphorus-containing anhydrides;motor activity;nucleoside-triphosphatase activity;pyrophosphatase activity	Dynein_light	9	4	4	92.1	43.8	43.8	10.35	0	323.31	563550000	80	25.0653	25.0559	25.3832	24.4799	25.0236	25.0663	24.4426	25.0074	0.111102	0.181192
Dual specificity tyrosine-phosphorylation-regulated kinase 1A	DYRK1A	Q13627-3;Q13627-4;Q13627-5;Q13627-2;Q13627;E7EMI5;M0R2X3;M0R131;Q9Y463-2;Q9Y463-3;Q9Y463;Q76N25	Q13627-3;Q13627-4;Q13627-5;Q13627-2;Q13627	adenyl nucleotide binding;adenyl ribonucleotide binding;ATP binding;binding;catalytic activity;cytoskeletal protein binding;kinase activity;non-membrane spanning protein tyrosine kinase activity;nucleotide binding;phosphotransferase activity, alcohol group as acceptor;protein binding;protein binding transcription factor activity;protein kinase activity;protein self-association;protein serine/thre…	Pkinase	7	7	7	18.1	18.1	18.1	60.329	0	13.966	140040000	52	23.2426	23.3903	23.5426	23.0448	23.2843	23.3285	22.9434	23.2089	0.113797	0.359165
Enoyl-CoA hydratase, mitochondrial	ECHS1	P30084	P30084	carbon-oxygen lyase activity;catalytic activity;enoyl-CoA hydratase activity;hydro-lyase activity;lyase activity	ECH	13	13	13	52.4	52.4	52.4	31.387	0	158.93	808020000	230	25.8102	25.4519	25.5115	26.0853	25.6657	25.0201	25.5634	25.3289	0.320176	0.772016
Elongation factor 1-alpha 1;Putative elongation factor 1-alpha-like 3;Elongation factor 1-alpha	EEF1A1;EEF1A1P5	P68104;Q5VTE0;A0A087WVQ9;P68104-2;A0A087WV01;Q5JR01;A6PW80	P68104;Q5VTE0;A0A087WVQ9;P68104-2;A0A087WV01	binding;catalytic activity;enzyme binding;GTP binding;GTPase activity;guanyl nucleotide binding;guanyl ribonucleotide binding;hydrolase activity;hydrolase activity, acting on acid anhydrides;hydrolase activity, acting on acid anhydrides, in phosphorus-containing anhydrides;kinase binding;nucleic acid binding;nucleoside-triphosphatase activity;nucleotide binding;protein binding;protein kinase bind…	GTP_EFTU;GTP_EFTU_D2;GTP_EFTU_D3	25	25	11	65.6	65.6	39.6	50.14	0	210.05	4229700000	501	28.0646	27.8094	27.7006	28.7999	27.9167	27.576	27.9995	27.6164	0.316459	0.546011
Elongation factor 1-beta	EEF1B2	P24534;F2Z2G2;C9JZW3;F8WF65	P24534	binding;nucleic acid binding;RNA binding;translation elongation factor activity;translation factor activity, nucleic acid binding	EF-1_beta_acid;EF1_GNE	8	8	8	57.3	57.3	57.3	24.763	0	45.679	161020000	55	24.0197	22.4119	23.0939	24.6944	22.9541	21.8369	22.7089	21.867	1.21324	1.09144
Elongation factor 1-delta	EEF1D	E9PK01;P29692-3;P29692;E9PN91;E9PMW7;E9PPR1;E9PL12;E9PL71;E9PQ49;E9PI39;E9PQZ1;P29692-4;E9PNW6;E9PKK3;E9PK72;E9PJD0;E9PK06	E9PK01;P29692-3;P29692;E9PN91;E9PMW7;E9PPR1;E9PL12;E9PL71;E9PQ49;E9PI39;E9PQZ1;P29692-4	activating transcription factor binding;binding;DNA binding;heat shock protein binding;molecular transducer activity;nucleic acid binding;protein binding;RNA binding;signal transducer activity;transcription factor binding;translation elongation factor activity;translation factor activity, nucleic acid binding	EF-1_beta_acid;EF1_GNE	4	4	1	23.4	23.4	3.4	28.821	0	48.142	58673000	12	22.3515	NaN	21.7982	23.5492	21.9863	NaN	21.8776	NaN	0.634376	0.384505
Elongation factor 1-gamma	EEF1G	P26641;P26641-2	P26641;P26641-2	binding;nucleic acid binding;RNA binding;translation elongation factor activity;translation factor activity, nucleic acid binding	EF1G;GST_C;GST_N	7	7	7	15.8	15.8	15.8	50.118	0	37.659	150400000	58	23.316	22.4878	22.5568	24.0914	22.522	22.7297	22.9866	22.6748	0.384768	0.443466
Elongation factor 2	EEF2	P13639	P13639	binding;catalytic activity;enzyme binding;GTP binding;GTPase activity;guanyl nucleotide binding;guanyl ribonucleotide binding;hydrolase activity;hydrolase activity, acting on acid anhydrides;hydrolase activity, acting on acid anhydrides, in phosphorus-containing anhydrides;kinase binding;nucleic acid binding;nucleoside-triphosphatase activity;nucleotide binding;protein binding;protein kinase bind…	EFG_C;EFG_II;EFG_IV;GTP_EFTU;GTP_EFTU_D2	49	49	49	58.4	58.4	58.4	95.337	0	209.87	1966900000	520	27.1798	26.3783	26.5075	27.7834	26.6666	26.1999	26.7786	26.4987	0.426358	0.572899
Epidermal growth factor receptor;Receptor protein-tyrosine kinase	EGFR	P00533;E9PFD7;Q504U8;A0A0B4J1Y5;P00533-4;P00533-3;P00533-2;C9JYS6;H3BLT0;P04626-6	P00533;E9PFD7;Q504U8;A0A0B4J1Y5;P00533-4;P00533-3	actin binding;actin filament binding;adenyl nucleotide binding;adenyl ribonucleotide binding;ATP binding;binding;catalytic activity;chromatin binding;cytoskeletal protein binding;DNA binding;double-stranded DNA binding;enzyme binding;epidermal growth factor-activated receptor activity;ErbB-3 class receptor binding;identical protein binding;kinase activity;MAP kinase kinase kinase activity;molecul…	Furin-like;Pkinase_Tyr;Recep_L_domain	53	53	49	49.5	49.5	45.1	134.28	0	303.95	3951600000	704	27.9492	28.2903	28.2549	27.8091	28.0758	28.1693	27.9915	28.2455	-0.0446482	0.129344
Etoposide-induced protein 2.4 homolog	EI24	O14681;E9PL33;E9PM05;E9PS58;E9PK61;O14681-3;E9PLB8;E9PQN7;A0A087WV44;B7ZB74	O14681;E9PL33;E9PM05;E9PS58;E9PK61;O14681-3;E9PLB8			6	6	6	19.7	19.7	19.7	38.964	0	52.134	506640000	90	24.7569	24.9077	24.702	24.371	25.0641	24.685	25.0861	25.1069	-0.301151	1.02791
Interferon-induced, double-stranded RNA-activated protein kinase	EIF2AK2	P19525;P19525-2;C9JZT2;F8WBH4	P19525;P19525-2	adenyl nucleotide binding;adenyl ribonucleotide binding;ATP binding;binding;catalytic activity;double-stranded RNA binding;enzyme regulator activity;eukaryotic translation initiation factor 2alpha kinase activity;kinase activity;non-membrane spanning protein tyrosine kinase activity;nucleic acid binding;nucleotide binding;phosphatase regulator activity;phosphotransferase activity, alcohol group a…	dsrm;Pkinase	15	15	15	37.7	37.7	37.7	62.094	0	86.246	470210000	109	24.5692	24.7794	25.0577	24.6623	24.8664	24.7124	24.4368	24.7862	0.066721	0.184883
Eukaryotic translation initiation factor 2-alpha kinase 4	EIF2AK4	H0YME5;Q9P2K8-2;Q9P2K8;Q9P2K8-3	H0YME5;Q9P2K8-2;Q9P2K8	adenyl nucleotide binding;adenyl ribonucleotide binding;ATP binding;binding;catalytic activity;eukaryotic translation initiation factor 2alpha kinase activity;kinase activity;nucleotide binding;phosphotransferase activity, alcohol group as acceptor;protein kinase activity;protein serine/threonine kinase activity;purine nucleotide binding;purine ribonucleoside triphosphate binding;purine ribonucle…	HGTP_anticodon2;Pkinase;RWD	6	6	6	8.9	8.9	8.9	161.12	0	8.0213	53812000	20	NaN	22.5408	NaN	21.7006	NaN	22.1331	22.0777	22.2129	-0.0205838	0.0212075
Eukaryotic translation initiation factor 3 subunit A	EIF3A	Q14152-2;Q14152	Q14152-2;Q14152	binding;nucleic acid binding;RNA binding;structural molecule activity;translation factor activity, nucleic acid binding;translation initiation factor activity	PCI	4	4	4	3.8	3.8	3.8	162.63	0	9.4922	36100000	9	22.1233	NaN	21.4857	22.0614	NaN	21.4242	NaN	NaN	0.465875	0
Eukaryotic translation initiation factor 3 subunit B	EIF3B	P55884;P55884-2;C9JQN7;C9JZG1	P55884;P55884-2	binding;nucleic acid binding;nucleotide binding;protein binding;protein complex scaffold;RNA binding;structural molecule activity;translation factor activity, nucleic acid binding;translation initiation factor activity	eIF2A;RRM_1	3	3	3	6.9	6.9	6.9	92.48	0	23.121	40523000	13	NaN	22.0015	22.0228	21.8777	NaN	NaN	NaN	NaN	NaN	0
Eukaryotic translation initiation factor 3 subunit D	EIF3D	O15371-2;O15371-3;O15371;B0QYA4;B0QYA5	O15371-2;O15371-3;O15371;B0QYA4	binding;nucleic acid binding;RNA binding;translation factor activity, nucleic acid binding;translation initiation factor activity	eIF-3_zeta	5	5	5	15.6	15.6	15.6	58.14	0	11.728	79939000	26	22.3583	22.3588	22.4948	22.9335	22.2391	22.0176	22.4239	21.9329	0.383002	1.14248
Eukaryotic translation initiation factor 3 subunit H	EIF3H	E5RJT0;A0A087WZK9;B3KS98;O15372;E5RGU4	E5RJT0;A0A087WZK9;B3KS98;O15372;E5RGU4	binding;nucleic acid binding;RNA binding;translation factor activity, nucleic acid binding;translation initiation factor activity	JAB	4	4	4	27.5	27.5	27.5	28.375	0	4.9467	22613000	10	21.5602	20.5541	20.7157	21.8286	NaN	NaN	NaN	20.3023	0.86235	0
Eukaryotic translation initiation factor 3 subunit I	EIF3I	Q13347;Q5TFK1	Q13347	binding;nucleic acid binding;RNA binding;translation factor activity, nucleic acid binding;translation initiation factor activity	WD40	3	3	3	13.5	13.5	13.5	36.501	0	3.9726	21489000	18	21.0552	20.8535	20.4386	21.6885	20.7101	NaN	NaN	NaN	0.298861	0
Eukaryotic translation initiation factor 3 subunit J	EIF3J	O75822;O75822-2;H0YLP3;H0YGJ7	O75822;O75822-2	binding;nucleic acid binding;RNA binding;translation factor activity, nucleic acid binding;translation initiation factor activity	eIF3_subunit	43	43	5	86.8	86.8	24.8	29.062	0	323.31	43665000000	1553	31.3694	31.7331	31.705	31.369	31.5897	31.5848	31.3832	31.5445	0.0185437	0.0584184
Eukaryotic initiation factor 4A-I	EIF4A1	P60842;J3KT12;P60842-2;J3QS69;J3KTB5;J3QL43;J3QLN6;J3KS25;J3QR64;J3QKZ9;J3KSZ0;E7EQG2;Q14240;Q14240-2;J3KTN0;J3KS93;J3QL52;J3KT04;E7EMV8;J3KSN7;J3QQP0;E9PBH4;F8WE11	P60842;J3KT12;P60842-2;J3QS69;J3KTB5;J3QL43	adenyl nucleotide binding;adenyl ribonucleotide binding;ATP binding;ATPase activity;ATPase activity, coupled;ATP-dependent helicase activity;ATP-dependent RNA helicase activity;binding;catalytic activity;double-stranded RNA binding;helicase activity;hydrolase activity;hydrolase activity, acting on acid anhydrides;hydrolase activity, acting on acid anhydrides, in phosphorus-containing anhydrides;m…	DEAD;Helicase_C	16	16	14	54.9	54.9	48.8	46.153	0	88.502	424760000	155	24.9946	24.1072	24.1676	25.5887	24.4154	24.2956	24.7994	24.4152	0.233124	0.257037
Eukaryotic initiation factor 4A-III;Eukaryotic initiation factor 4A-III, N-terminally processed	EIF4A3	P38919;I3L3H2	P38919	adenyl nucleotide binding;adenyl ribonucleotide binding;ATP binding;ATPase activity;ATPase activity, coupled;ATP-dependent helicase activity;ATP-dependent RNA helicase activity;binding;catalytic activity;helicase activity;hydrolase activity;hydrolase activity, acting on acid anhydrides;hydrolase activity, acting on acid anhydrides, in phosphorus-containing anhydrides;mRNA binding;nucleic acid bin…	DEAD;Helicase_C	9	7	7	29.4	23.4	23.4	46.871	0	7.7306	588880000	23	25.6406	NaN	24.9247	26.0121	24.4987	24.9483	25.6932	24.7138	0.562336	0.646009
Eukaryotic translation initiation factor 5A-1;Eukaryotic translation initiation factor 5A;Eukaryotic translation initiation factor 5A-1-like;Eukaryotic translation initiation factor 5A-2	EIF5A;EIF5AL1;EIF5A2	P63241;P63241-2;I3L397;I3L504;Q6IS14;F8WCJ1;C9J7B5;C9J4W5;Q9GZV4	P63241;P63241-2;I3L397;I3L504;Q6IS14;F8WCJ1;C9J7B5;C9J4W5;Q9GZV4	binding;nucleic acid binding;protein binding;protein N-terminus binding;ribonucleoprotein binding;ribosome binding;RNA binding;snRNA binding;translation elongation factor activity;translation factor activity, nucleic acid binding;U6 snRNA binding	eIF-5a	10	10	10	90.9	90.9	90.9	16.832	0	116	676760000	201	25.5786	24.7635	24.8525	26.6715	25.4596	24.6612	25.2679	24.8122	0.41632	0.37819
Elongation of very long chain fatty acids protein 1	ELOVL1	Q9BW60-2;Q9BW60	Q9BW60-2;Q9BW60	catalytic activity;fatty acid elongase activity;fatty acid synthase activity;transferase activity;transferase activity, transferring acyl groups;transferase activity, transferring acyl groups other than amino-acyl groups	ELO	2	2	2	7.1	7.1	7.1	29.485	0	4.1892	71018000	39	21.7944	21.9768	NaN	21.3432	21.8896	21.9356	22.0651	22.3395	-0.35263	0.87049
Elongation of very long chain fatty acids protein;Elongation of very long chain fatty acids protein 7	ELOVL7	D6RE10;D6RBR5;D6RBM2;A1L3X0	D6RE10;D6RBR5;D6RBM2;A1L3X0	catalytic activity;transferase activity	ELO	2	2	2	25.4	25.4	25.4	8.2937	0	4.7932	36592000	26	20.9764	NaN	NaN	20.8902	21.6263	NaN	21.6263	21.547	-0.666567	3.12377
Emerin	EMD	P50402;Q5HY57;F8WEQ1	P50402;Q5HY57	actin binding;beta-tubulin binding;binding;cytoskeletal protein binding;protein binding;tubulin binding	LEM	8	8	8	34.6	34.6	34.6	28.994	0	26.151	155880000	75	23.2554	22.769	23.3906	23.2462	23.1146	23.2529	23.3035	23.2458	-0.0638986	0.17488
Endonuclease domain-containing 1 protein	ENDOD1	O94919	O94919	binding;catalytic activity;cation binding;endonuclease activity;hydrolase activity;hydrolase activity, acting on ester bonds;ion binding;metal ion binding;nuclease activity;nucleic acid binding	Endonuclease_NS	15	15	15	45	45	45	55.016	0	121.38	1436000000	336	26.049	26.6406	26.3847	25.8609	26.4761	26.0178	26.2733	26.4791	-0.077745	0.144132
Alpha-enolase;Enolase	ENO1	P06733;P06733-2;K7EM90;P13929-2;P13929;P09104;P13929-3;P09104-2;E5RI09;E5RG95;K7EPM1;K7EKN2;E5RGZ4;F5H0C8;F5H1C3	P06733;P06733-2;K7EM90	binding;carbon-oxygen lyase activity;catalytic activity;cation binding;DNA binding;enzyme binding;GTPase binding;hydro-lyase activity;ion binding;lyase activity;magnesium ion binding;metal ion binding;nucleic acid binding;nucleic acid binding transcription factor activity;phosphopyruvate hydratase activity;protein binding;protein binding transcription factor activity;sequence-specific DNA binding…	Enolase_C;Enolase_N	34	34	34	80.2	80.2	80.2	47.168	0	319.35	2697000000	544	27.8845	26.4162	26.8656	28.9839	27.3114	26.0334	27.3785	26.7275	0.674863	0.468203
Ephrin type-A receptor 1	EPHA1	P21709;P21709-3;P21709-2	P21709	adenyl nucleotide binding;adenyl ribonucleotide binding;ATP binding;binding;catalytic activity;enzyme binding;ephrin receptor activity;kinase activity;kinase binding;molecular transducer activity;nucleotide binding;phosphotransferase activity, alcohol group as acceptor;protein binding;protein kinase activity;protein kinase binding;protein tyrosine kinase activity;purine nucleotide binding;purine …	EphA2_TM;Ephrin_lbd;fn3;Pkinase_Tyr;SAM_1	15	15	15	20.1	20.1	20.1	108.13	0	80.482	577630000	129	25.3039	25.3948	25.3358	24.962	25.0953	25.2524	25.0923	25.4743	0.0205355	0.0544675
Ephrin type-A receptor 2	EPHA2	P29317;P29317-2;Q5JY90;U3NG26;Q06187;Q06187-2;P29322	P29317	adenyl nucleotide binding;adenyl ribonucleotide binding;ATP binding;binding;catalytic activity;cation binding;ephrin receptor activity;GPI-linked ephrin receptor activity;identical protein binding;ion binding;kinase activity;lipid binding;metal ion binding;molecular transducer activity;non-membrane spanning protein tyrosine kinase activity;nucleotide binding;phosphatidylinositol binding;phosphati…	BTK;EphA2_TM;Ephrin_lbd;fn3;PH;Pkinase_Tyr;SAM_1;SH2;SH3_1	58	58	56	74.9	74.9	73	108.27	0	299.2	5054200000	838	28.2175	28.3705	28.4039	27.7801	28.4182	28.3784	28.5071	28.4732	-0.25122	0.863902
Receptor protein-tyrosine kinase;Ephrin type-A receptor 4	EPHA4	E9PG71;P54764;P54764-2;C9JIX8;F5GZZ5	E9PG71;P54764;P54764-2	adenyl nucleotide binding;adenyl ribonucleotide binding;ATP binding;binding;catalytic activity;ephrin receptor activity;GPI-linked ephrin receptor activity;kinase activity;molecular transducer activity;nucleotide binding;PH domain binding;phosphotransferase activity, alcohol group as acceptor;protein binding;protein domain specific binding;protein kinase activity;protein tyrosine kinase activity;…	EphA2_TM;Ephrin_lbd;fn3;Pkinase_Tyr;SAM_2	8	7	6	13.4	12.2	10.9	105.71	0	10.93	49899000	25	22.2083	22.425	22.5693	NaN	22.1808	22.4154	22.2718	22.2254	0.127482	0.545648
Ephrin type-A receptor 7	EPHA7	Q15375-2;Q15375-4;Q15375;Q15375-5;Q15375-3;J3KR66;A0A0B4J1T8;Q9UF33-2;Q9UF33-3;Q9UF33;J3KQG3;Q5JZY3-2;Q5JZY3-3;Q5JZY3;B4DXM2;B4DXQ6	Q15375-2;Q15375-4;Q15375	adenyl nucleotide binding;adenyl ribonucleotide binding;ATP binding;axon guidance receptor activity;binding;catalytic activity;chemorepellent activity;ephrin receptor activity;GPI-linked ephrin receptor activity;kinase activity;molecular transducer activity;nucleotide binding;phosphotransferase activity, alcohol group as acceptor;protein kinase activity;protein tyrosine kinase activity;purine nuc…	EphA2_TM;Ephrin_lbd;fn3;GCC2_GCC3;Pkinase_Tyr;SAM_1;SAM_2	22	20	17	37	35	31.2	111.5	0	52.749	440970000	128	24.8739	24.8171	24.7965	24.2451	24.7762	24.6859	24.5144	24.9947	-0.0596247	0.125703
Ephrin type-B receptor 2;Receptor protein-tyrosine kinase	EPHB2	P29323-2;P29323-3;P29323;B1AKC9;Q6NVW1;P54762-5;P54762	P29323-2;P29323-3;P29323;B1AKC9	adenyl nucleotide binding;adenyl ribonucleotide binding;ATP binding;axon guidance receptor activity;binding;catalytic activity;ephrin receptor activity;kinase activity;molecular transducer activity;nucleotide binding;phosphotransferase activity, alcohol group as acceptor;protein kinase activity;protein tyrosine kinase activity;purine nucleotide binding;purine ribonucleoside triphosphate binding;p…	EphA2_TM;Ephrin_lbd;fn3;GCC2_GCC3;Pkinase_Tyr;SAM_1	21	18	18	31.3	28.5	28.5	109.87	0	85.819	522150000	191	24.974	25.0594	24.9812	24.6525	25.2214	24.9722	24.9533	24.9746	-0.113577	0.463776
Receptor protein-tyrosine kinase;Ephrin type-B receptor 4	EPHB4	Q96L35;P54760;P54760-2;P54760-4;P54760-3;P54753	Q96L35;P54760;P54760-2;P54760-4	adenyl nucleotide binding;adenyl ribonucleotide binding;ATP binding;axon guidance receptor activity;binding;catalytic activity;ephrin receptor activity;kinase activity;molecular transducer activity;nucleotide binding;phosphotransferase activity, alcohol group as acceptor;protein kinase activity;protein tyrosine kinase activity;purine nucleotide binding;purine ribonucleoside triphosphate binding;p…	EphA2_TM;Ephrin_lbd;fn3;GCC2_GCC3;Pkinase_Tyr;SAM_1	13	11	11	20.2	18.2	18.2	102.56	0	39.747	200210000	71	23.6087	23.7617	23.5788	23.2294	23.9243	23.8175	24.1626	23.8283	-0.388552	1.51404
Bifunctional glutamate/proline--tRNA ligase;Glutamate--tRNA ligase;Proline--tRNA ligase	EPRS	P07814;V9GYZ6;V9GZ76	P07814;V9GYZ6	adenyl nucleotide binding;adenyl ribonucleotide binding;aminoacyl-tRNA ligase activity;ATP binding;binding;catalytic activity;enzyme binding;glutamate-tRNA ligase activity;GTPase binding;ligase activity;ligase activity, forming aminoacyl-tRNA and related compounds;ligase activity, forming carbon-oxygen bonds;nucleic acid binding;nucleotide binding;proline-tRNA ligase activity;protein binding;puri…	GST_C_3;HGTP_anticodon;ProRS-C_1;tRNA-synt_1c;tRNA-synt_1c_C;tRNA-synt_2b;WHEP-TRS	18	18	18	20.2	20.2	20.2	170.59	0	75.141	248900000	116	23.8791	23.8245	23.6663	24.0416	24.0438	23.8342	23.5482	23.7245	0.0652337	0.199138
Erlin-1	ERLIN1	O75477	O75477		Band_7	3	2	2	13	9.5	9.5	38.925	0	12.744	31892000	27	NaN	20.6227	NaN	20.9823	NaN	NaN	21.318	21.6178	-0.665428	0.980137
Erlin-2	ERLIN2	E5RHW4;O94905;E5RJ09;B0QZ43;O94905-2;O94905-3	E5RHW4;O94905		Band_7	8	8	7	39.3	39.3	35.8	37.725	0	18.867	163550000	46	23.1082	23.3196	22.8783	22.643	23.5853	23.3088	23.6031	23.6113	-0.539835	1.7899
Serine/threonine-protein kinase/endoribonuclease IRE1;Serine/threonine-protein kinase;Endoribonuclease	ERN1	O75460	O75460	adenyl nucleotide binding;adenyl ribonucleotide binding;ADP binding;ATP binding;binding;catalytic activity;cation binding;endonuclease activity;endoribonuclease activity;enzyme binding;heat shock protein binding;Hsp70 protein binding;Hsp90 protein binding;hydrolase activity;hydrolase activity, acting on ester bonds;identical protein binding;ion binding;kinase activity;magnesium ion binding;metal …	Pkinase;Ribonuc_2-5A	38	38	38	37.1	37.1	37.1	109.73	0	201.64	2552300000	245	28.7329	28.901	28.9863	28.8087	24.649	23.4083	19.6706	21.1312	6.64242	2.9907
Electron transfer flavoprotein subunit alpha, mitochondrial	ETFA	H0YL83;H0YK49;H0YNX6;H0YLU7;P13804-2;P13804;H0YM12	H0YL83;H0YK49;H0YNX6;H0YLU7;P13804-2;P13804;H0YM12	binding;catalytic activity;coenzyme binding;cofactor binding;electron carrier activity;flavin adenine dinucleotide binding;oxidoreductase activity	ETF;ETF_alpha	2	2	2	68.5	68.5	68.5	7.8392	0	34.942	31978000	9	21.8471	NaN	NaN	22.1466	21.9407	NaN	21.5494	NaN	0.251834	0.382754
RNA-binding protein EWS	EWSR1	A0A0D9SFL3;B0QYK0;C9JGE3;Q01844-2;Q01844-6;Q01844-3;Q01844;Q01844-5;H7BY36	A0A0D9SFL3;B0QYK0;C9JGE3;Q01844-2;Q01844-6;Q01844-3;Q01844;Q01844-5;H7BY36	binding;cation binding;identical protein binding;ion binding;metal ion binding;nucleic acid binding;nucleotide binding;protein binding;RNA binding;transition metal ion binding;zinc ion binding	zf-RanBP	3	3	3	9.4	9.4	9.4	61.414	0	5.1201	67792000	20	NaN	23.7921	21.7374	22.3157	21.3238	NaN	22.0231	21.595	0.967779	0.682501
Ezrin	EZR	P15311;E7EQR4;P35241;P35241-5;P35241-3;E9PNP4;V9GZ54;E9PQ82;E9PNV3;P35241-4	P15311;E7EQR4	actin binding;actin filament binding;binding;cell adhesion molecule binding;cytoskeletal protein binding;protein binding	ERM;FERM_C;FERM_M;FERM_N	12	12	8	23.7	23.7	19.3	69.412	0	25.549	219310000	63	24.4105	22.62	21.8503	25.5512	23.1711	21.991	23.4241	22.6831	0.790729	0.384566
Fatty acid-binding protein, epidermal	FABP5	Q01469;I6L8B7;A8MUU1	Q01469;I6L8B7	binding;carboxylic acid binding;fatty acid binding;lipid binding;monocarboxylic acid binding;transporter activity	Lipocalin	8	8	8	80.7	80.7	80.7	15.164	0	21.73	117900000	42	23.2135	NaN	23.2373	24.4298	22.036	NaN	23.0186	22.6885	1.04583	0.991658
Fatty acid desaturase 1	FADS1	O60427;H7C2V0;F5H3P6;F5H3U5;O60427-2;H0YB97	O60427;H7C2V0	binding;C-5 sterol desaturase activity;catalytic activity;cation binding;heme binding;ion binding;iron ion binding;metal ion binding;oxidoreductase activity;oxidoreductase activity, acting on paired donors, with incorporation or reduction of molecular oxygen;oxidoreductase activity, acting on paired donors, with oxidation of a pair of donors resulting in the reduction of molecular oxygen to two m…	Cyt-b5;FA_desaturase	10	10	2	28.4	28.4	4.1	51.964	0	56.563	395560000	124	24.2644	24.1658	24.2752	23.819	24.6174	24.4051	24.443	24.5929	-0.383518	1.73775
Fatty acyl-CoA reductase 1	FAR1	E9PNW8;Q8WVX9	E9PNW8;Q8WVX9	catalytic activity;fatty-acyl-CoA reductase (alcohol-forming) activity;long-chain-fatty-acyl-CoA reductase activity;oxidoreductase activity;oxidoreductase activity, acting on the aldehyde or oxo group of donors;oxidoreductase activity, acting on the aldehyde or oxo group of donors, NAD or NADP as acceptor	NAD_binding_4;Sterile	3	3	3	11.3	11.3	11.3	37.481	0	5.4253	95567000	37	22.4127	22.6076	22.3455	22.4809	22.6762	22.4102	22.5301	22.5121	-0.0704813	0.39479
Phenylalanine--tRNA ligase alpha subunit	FARSA	Q9Y285-2;Q9Y285;K7ER16;K7ER00;K7EK06;K7EPH2	Q9Y285-2;Q9Y285;K7ER16;K7ER00;K7EK06	adenyl nucleotide binding;adenyl ribonucleotide binding;aminoacyl-tRNA ligase activity;ATP binding;binding;catalytic activity;ligase activity;ligase activity, forming aminoacyl-tRNA and related compounds;ligase activity, forming carbon-oxygen bonds;nucleic acid binding;nucleotide binding;phenylalanine-tRNA ligase activity;purine nucleotide binding;purine ribonucleoside triphosphate binding;purine…	HTH_11;tRNA-synt_2d	5	5	5	16.8	16.8	16.8	54.157	0	7.5117	38706000	14	21.7838	21.4291	NaN	22.0418	NaN	NaN	21.6353	21.6166	0.125591	0.206081
Fatty acid synthase;[Acyl-carrier-protein] S-acetyltransferase;[Acyl-carrier-protein] S-malonyltransferase;3-oxoacyl-[acyl-carrier-protein] synthase;3-oxoacyl-[acyl-carrier-protein] reductase;3-hydroxyacyl-[acyl-carrier-protein] dehydratase;Enoyl-[acyl-carrier-protein] reductase;Oleoyl-[acyl-carrier-protein] hydrolase	FASN	P49327	P49327	[acyl-carrier-protein] S-acetyltransferase activity;[acyl-carrier-protein] S-malonyltransferase activity;3-hydroxyacyl-[acyl-carrier-protein] dehydratase activity;3-hydroxyoctanoyl-[acyl-carrier-protein] dehydratase activity;3-hydroxypalmitoyl-[acyl-carrier-protein] dehydratase activity;3-oxoacyl-[acyl-carrier-protein] reductase (NADPH) activity;3-oxoacyl-[acyl-carrier-protein] synthase activity;…	Acyl_transf_1;adh_short;ADH_zinc_N;ketoacyl-synt;Ketoacyl-synt_C;Methyltransf_12;PP-binding;PS-DH;Thioesterase	18	18	18	15.9	15.9	15.9	273.42	0	74.014	297920000	101	24.2176	24.2531	24.0219	24.6261	24.1803	23.9981	24.0622	24.211	0.166791	0.576774
40S ribosomal protein S30	FAU	E9PR30;P62861	E9PR30;P62861	binding;nucleic acid binding;RNA binding;structural constituent of ribosome;structural molecule activity	Ribosomal_S30	2	2	2	11.2	11.2	11.2	10.905	0	5.3331	136960000	33	22.7876	23.5637	NaN	22.7136	22.9916	23.3141	22.9318	23.0227	-0.0434024	0.0613084
rRNA 2-O-methyltransferase fibrillarin	FBL	M0R299;M0QXL5;M0R2Q4;P22087;M0R0P1;M0R2U2;M0R1H0;M0R2B0;A6NHQ2	M0R299;M0QXL5;M0R2Q4;P22087;M0R0P1	binding;catalytic activity;methyltransferase activity;nucleic acid binding;RNA binding;RNA methyltransferase activity;rRNA methyltransferase activity;S-adenosylmethionine-dependent methyltransferase activity;transferase activity;transferase activity, transferring one-carbon groups	Fibrillarin	6	6	6	49.8	49.8	49.8	25.308	0	24.921	178190000	47	22.7494	23.1612	23.4144	23.4828	22.8893	24.4253	23.3299	23.7742	-0.402729	0.501584
Probable fibrosin-1	FBRS	J3KNZ9;Q9HAH7;Q9HAH7-1;H3BRE6	J3KNZ9;Q9HAH7;Q9HAH7-1			8	8	8	11.9	11.9	11.9	103.77	0	21.752	219440000	59	23.7225	24.122	24.0184	23.729	24.2438	24.0903	23.5927	23.9136	-0.0621343	0.135744
NADPH:adrenodoxin oxidoreductase, mitochondrial	FDXR	J3QQX3;A0A0A0MTR6;A0A0C4DFN8;A0A0C4DGN7;A0A0A0MSZ4;A0A0A0MT64;P22570-6;P22570-5;P22570;P22570-2;P22570-7;P22570-3;A0A0A0MTN9;P22570-4;J3KS64;J3QQW7	J3QQX3;A0A0A0MTR6;A0A0C4DFN8;A0A0C4DGN7;A0A0A0MSZ4;A0A0A0MT64;P22570-6;P22570-5;P22570;P22570-2;P22570-7;P22570-3;A0A0A0MTN9;P22570-4	binding;catalytic activity;coenzyme binding;cofactor binding;ferredoxin-NADP+ reductase activity;NADP binding;NADPH binding;NADPH-adrenodoxin reductase activity;nucleotide binding;oxidoreductase activity;oxidoreductase activity, acting on iron-sulfur proteins as donors;oxidoreductase activity, acting on iron-sulfur proteins as donors, NAD or NADP as acceptor		3	3	3	15.1	15.1	15.1	50.619	0	13.282	10356000	4	20.7769	NaN	NaN	21.547	NaN	NaN	NaN	NaN	NaN	0
Tyrosine-protein kinase Fer	FER	P16591-3	P16591-3	adenyl nucleotide binding;adenyl ribonucleotide binding;ATP binding;binding;catalytic activity;epidermal growth factor receptor binding;growth factor receptor binding;kinase activity;lipid binding;non-membrane spanning protein tyrosine kinase activity;nucleotide binding;phosphotransferase activity, alcohol group as acceptor;protein binding;protein kinase activity;protein tyrosine kinase activity;…	FCH;Pkinase_Tyr;SH2	54	5	5	82.1	9.3	9.3	51.642	0	52.264	570000000	103	25.2836	25.342	25.8069	24.7657	25.018	25.2242	25.3378	25.26	0.089529	0.153163
Tyrosine-protein kinase Fer;Non-specific protein-tyrosine kinase	FER;Pe1Fe10	P16591;P16591-2;W0S4B9;A0A0D9SEV4;D6RAF9;E7ENM8;P07332-2;P07332-4;P07332-3;P07332;P10721-2;P10721	P16591;P16591-2;W0S4B9	adenyl nucleotide binding;adenyl ribonucleotide binding;ATP binding;binding;catalytic activity;cation binding;cytokine binding;epidermal growth factor receptor binding;growth factor receptor binding;identical protein binding;immunoglobulin receptor binding;ion binding;kinase activity;lipid binding;metal ion binding;molecular transducer activity;non-membrane spanning protein tyrosine kinase activi…	FCH;ig;Pkinase_Tyr;SH2	75	75	26	75.7	75.7	35.5	94.637	0	323.31	15531000000	1396	30.0282	30.096	30.1242	29.8019	29.9417	29.9038	29.6504	29.9852	0.142272	0.650672
Fibroblast growth factor receptor;Fibroblast growth factor receptor 2;Receptor protein-tyrosine kinase	FGFR2	A0A0A0MR25;P21802-15;P21802-23;P21802-8;P21802-2;P21802-13;P21802-17;P21802-12;P21802-6;P21802-7;P21802-9;P21802-5;P21802-10;P21802-18;P21802;P21802-3;P21802-16;P21802-11;H7BXU9;E7EVR7;D2CGD1;P21802-22;P21802-4;P21802-20;P21802-21;H7C265;S4R381;P21802-14;P21802-19;S4R3B2;A0A087WY21	A0A0A0MR25;P21802-15;P21802-23;P21802-8;P21802-2;P21802-13;P21802-17;P21802-12;P21802-6;P21802-7;P21802-9;P21802-5;P21802-10;P21802-18;P21802;P21802-3;P21802-16;P21802-11;H7BXU9;E7EVR7;D2CGD1;P21802-22;P21802-4;P21802-20;P21802-21;H7C265;S4R381	adenyl nucleotide binding;adenyl ribonucleotide binding;ATP binding;binding;carbohydrate binding;catalytic activity;fibroblast growth factor binding;fibroblast growth factor-activated receptor activity;glycosaminoglycan binding;growth factor binding;heparin binding;identical protein binding;kinase activity;molecular transducer activity;nucleotide binding;pattern binding;phosphotransferase activit…	I-set;Pkinase_Tyr	9	9	6	15.1	15.1	12.4	92.07	0	34.721	283890000	82	24.204	24.275	24.3373	23.8798	24.2893	24.2463	24.2575	24.2262	-0.0807862	0.336153
Fumarate hydratase, mitochondrial	FH	P07954-2;P07954	P07954-2;P07954	carbon-oxygen lyase activity;catalytic activity;fumarate hydratase activity;hydro-lyase activity;lyase activity	FumaraseC_C;Lyase_1	5	5	5	24.6	24.6	24.6	50.212	0	18.512	18503000	7	21.93	NaN	NaN	22.3838	NaN	NaN	NaN	NaN	NaN	0
Acidic fibroblast growth factor intracellular-binding protein	FIBP	O43427-2;O43427;E9PSD3;H0YCE7;E9PJW6	O43427-2;O43427;E9PSD3	binding;fibroblast growth factor binding;growth factor binding;protein binding	FIBP	18	18	18	50.4	50.4	50.4	41.21	0	44.35	483110000	118	24.6371	24.8209	24.7705	24.5503	25.1611	24.9488	24.7164	24.9109	-0.239597	1.13981
Peptidyl-prolyl cis-trans isomerase FKBP4;Peptidyl-prolyl cis-trans isomerase FKBP4, N-terminally processed	FKBP4	Q02790;F5H1U3;F5H120;H0YFG2	Q02790	adenyl nucleotide binding;adenyl ribonucleotide binding;ATP binding;binding;binding, bridging;catalytic activity;cis-trans isomerase activity;drug binding;FK506 binding;GTP binding;guanyl nucleotide binding;guanyl ribonucleotide binding;heat shock protein binding;isomerase activity;macrolide binding;nucleotide binding;peptidyl-prolyl cis-trans isomerase activity;protein binding;protein binding, b…	FKBP_C;TPR_1	11	11	11	36.2	36.2	36.2	51.804	0	13.001	69359000	22	22.4062	22.0638	21.6251	24.071	21.9954	NaN	22.3473	NaN	0.370178	0.17335
FAD synthase;Molybdenum cofactor biosynthesis protein-like region;FAD synthase region	FLAD1	Q5T196;Q8NFF5-4;Q8NFF5-5;Q8NFF5-3;Q8NFF5-2;Q8NFF5;Q5T191	Q5T196;Q8NFF5-4;Q8NFF5-5;Q8NFF5-3;Q8NFF5-2;Q8NFF5;Q5T191	adenyl nucleotide binding;adenyl ribonucleotide binding;adenylyltransferase activity;ATP binding;binding;catalytic activity;FMN adenylyltransferase activity;nucleotide binding;nucleotidyltransferase activity;purine nucleotide binding;purine ribonucleoside triphosphate binding;purine ribonucleotide binding;ribonucleotide binding;transferase activity;transferase activity, transferring phosphorus-co…	MoCF_biosynth;PAPS_reduct	4	4	4	13.2	13.2	13.2	50.141	0	5.13	54584000	27	21.6257	21.8373	21.5881	21.7675	NaN	21.6354	21.6727	NaN	0.0506024	0.222309
Filamin-A	FLNA	Q5HY54;Q60FE5;P21333-2;P21333;A0A087WWY3;H7C2E7;H0Y5F3;F8WE98	Q5HY54;Q60FE5;P21333-2;P21333;A0A087WWY3	actin binding;actin filament binding;binding;cytoskeletal protein binding;enzyme binding;Fc-gamma receptor I complex binding;glycoprotein binding;GTPase binding;identical protein binding;immunoglobulin receptor binding;molecular transducer activity;protein binding;protein dimerization activity;protein homodimerization activity;Rac GTPase binding;Ral GTPase binding;Ras GTPase binding;receptor bind…	CH;Filamin	5	5	5	4.3	4.3	4.3	276.55	0	7.8221	29438000	9	21.7586	NaN	NaN	22.0182	21.6987	NaN	NaN	NaN	0.189717	0
Flotillin-1	FLOT1	O75955;O75955-2;A2AB09;A2AB10;A2AB12;A2AB13;A0A0G2JJQ6;A2AB11;A2ABJ5	O75955;O75955-2;A2AB09;A2AB10	binding;enzyme binding;protease binding;protein binding	Band_7	16	16	16	50.6	50.6	50.6	47.355	0	36.671	426920000	100	24.2836	24.45	24.7224	24.2009	24.6693	24.5268	24.6805	24.7228	-0.235604	0.986174
Flotillin-2	FLOT2	J3QLD9;E7EMK3;Q14254;K7EKW9	J3QLD9;E7EMK3;Q14254		Band_7	11	11	11	35.3	35.3	35.3	47.142	0	23.526	347760000	120	24.0119	24.3766	24.4081	23.8263	24.5817	23.9608	24.405	24.5333	-0.214456	0.487228
Receptor protein-tyrosine kinase;Vascular endothelial growth factor receptor 3	FLT4	E9PD35;P35916-1;P35916;P35916-3;D6RFF2	E9PD35;P35916-1;P35916;P35916-3	adenyl nucleotide binding;adenyl ribonucleotide binding;ATP binding;binding;catalytic activity;enzyme binding;growth factor binding;kinase activity;molecular transducer activity;nucleotide binding;phosphatase binding;phosphotransferase activity, alcohol group as acceptor;protein binding;protein kinase activity;protein phosphatase binding;protein tyrosine kinase activity;purine nucleotide binding;…	I-set;Pkinase_Tyr	8	8	8	11.4	11.4	11.4	146.45	0	22.472	153650000	45	23.2778	23.4591	23.4018	23.1563	23.2728	23.1834	23.4496	23.3541	0.00881863	0.0345154
Ketosamine-3-kinase	FN3KRP	Q9HA64;I3L139;I3L3W5;I3L2G3;I3L407;I3L378	Q9HA64;I3L139;I3L3W5	catalytic activity;kinase activity;transferase activity;transferase activity, transferring phosphorus-containing groups	Fructosamin_kin	15	15	15	55.7	55.7	55.7	34.412	0	45.901	1423800000	223	26.257	26.3943	26.2144	26.018	26.3864	26.2066	26.2726	26.4274	-0.102308	0.504471
Tyrosine-protein kinase FRK	FRK	P42685-2;P42685	P42685-2;P42685	adenyl nucleotide binding;adenyl ribonucleotide binding;ATP binding;binding;catalytic activity;kinase activity;non-membrane spanning protein tyrosine kinase activity;nucleotide binding;phosphotransferase activity, alcohol group as acceptor;protein binding;protein kinase activity;protein tyrosine kinase activity;purine nucleotide binding;purine ribonucleoside triphosphate binding;purine ribonucleo…	Pkinase_Tyr;SH2;SH3_1	9	8	8	35.3	33.1	33.1	41.98	0	37.026	143010000	33	23.4427	23.4327	23.2188	23.0546	23.4007	23.2398	22.8612	23.4003	0.0617304	0.149397
Far upstream element-binding protein 1	FUBP1	Q96AE4;E9PEB5;Q96AE4-2;C9JSZ1	Q96AE4;E9PEB5;Q96AE4-2	binding;DNA binding;nucleic acid binding;nucleic acid binding transcription factor activity;RNA binding;sequence-specific DNA binding transcription factor activity;single-stranded DNA binding;structure-specific DNA binding	DUF1897;KH_1	8	6	5	18.2	15.1	13.7	67.56	0	6.6337	18143000	13	21.4151	NaN	NaN	22.598	NaN	NaN	21.3491	NaN	0.657517	0
RNA-binding protein FUS	FUS	H3BPE7;P35637-2;P35637;A0A075B7D9;Q92804-2;Q92804	H3BPE7;P35637-2;P35637	binding;cation binding;DNA binding;identical protein binding;ion binding;metal ion binding;nucleic acid binding;nucleotide binding;protein binding;protein binding transcription factor activity;RNA binding;transcription coactivator activity;transcription cofactor activity;transcription factor binding transcription factor activity;transition metal ion binding;zinc ion binding	RRM_1;zf-RanBP	5	5	5	10.4	10.4	10.4	53.496	0	6.0182	161840000	32	NaN	24.7875	22.81	22.7963	NaN	NaN	23.0874	22.5931	0.624348	0.278689
Tyrosine-protein kinase Fyn	FYN	P06241;P06241-3;E5RFS5;E5RIX5;E5RGT0;E5RH71	P06241;P06241-3	adenyl nucleotide binding;adenyl ribonucleotide binding;ATP binding;binding;catalytic activity;cation binding;ephrin receptor binding;glycoprotein binding;growth factor receptor binding;ion binding;kinase activity;metal ion binding;non-membrane spanning protein tyrosine kinase activity;nucleotide binding;phosphotransferase activity, alcohol group as acceptor;protein binding;protein kinase activit…	Pkinase_Tyr;SH2;SH3_1	33	20	5	55.3	45.6	7.3	60.761	0	84.798	1078400000	233	26.2448	26.2243	26.0546	25.6094	26.1293	26.1329	25.9147	26.2068	-0.062604	0.148808
Cyclin-G-associated kinase	GAK	O14976;O14976-2;A0A087X1U9;H0Y8H5;D6RAW3;D6RE78;D6RC24;D6RAQ7;D6RF16;H0Y9M4;H0YA39	O14976;O14976-2	adenyl nucleotide binding;adenyl ribonucleotide binding;ATP binding;binding;catalytic activity;kinase activity;nucleotide binding;phosphotransferase activity, alcohol group as acceptor;protein kinase activity;protein serine/threonine kinase activity;purine nucleotide binding;purine ribonucleoside triphosphate binding;purine ribonucleotide binding;ribonucleotide binding;transferase activity;transf…	DnaJ;Pkinase;PTEN_C2	97	97	97	75.7	75.7	75.7	143.19	0	323.31	18465000000	2070	30.2914	30.3949	30.3736	29.968	30.238	30.3254	30.1469	30.3435	-0.00645256	0.0201822
Neutral alpha-glucosidase AB	GANAB	Q14697;Q14697-2;F5H6X6;E9PKU7	Q14697;Q14697-2;F5H6X6;E9PKU7	alpha-glucosidase activity;binding;carbohydrate binding;catalytic activity;glucan 1,3-alpha-glucosidase activity;glucosidase activity;hydrolase activity;hydrolase activity, acting on glycosyl bonds;hydrolase activity, hydrolyzing O-glycosyl compounds	Gal_mutarotas_2;Glyco_hydro_31	8	8	8	14.2	14.2	14.2	106.87	0	12.782	85939000	13	22.7292	NaN	NaN	23.4225	NaN	NaN	22.7567	22.5146	0.440233	0.451802
Glyceraldehyde-3-phosphate dehydrogenase	GAPDH	P04406;P04406-2;E7EUT5	P04406;P04406-2;E7EUT5	binding;catalytic activity;coenzyme binding;cofactor binding;cytoskeletal protein binding;glyceraldehyde-3-phosphate dehydrogenase (NAD+) (phosphorylating) activity;identical protein binding;microtubule binding;NAD binding;NADP binding;nucleotide binding;oxidoreductase activity;oxidoreductase activity, acting on the aldehyde or oxo group of donors;oxidoreductase activity, acting on the aldehyde o…	Gp_dh_C;Gp_dh_N	22	22	22	84.2	84.2	84.2	36.053	0	231.81	6810600000	660	28.7186	28.2824	28.2327	29.4439	28.54	28.0896	28.5281	28.2603	0.314908	0.474213
GTPase-activating protein and VPS9 domain-containing protein 1	GAPVD1	F8W9S7;Q14C86-3;Q14C86-4;Q14C86-5;Q14C86-2;Q14C86;Q14C86-6;B0QZ65;B4DGD8;C9IZ08;C9IZX9;A0A0A0MQV8;H0Y4E7;H0Y7I9	F8W9S7;Q14C86-3;Q14C86-4;Q14C86-5;Q14C86-2;Q14C86;Q14C86-6	binding;enzyme activator activity;enzyme regulator activity;GTPase activating protein binding;GTPase activator activity;GTPase regulator activity;guanyl-nucleotide exchange factor activity;nucleoside-triphosphatase regulator activity;protein binding	RasGAP;VPS9	5	5	5	5	5	5	157.46	0	5.9749	26462000	11	21.0134	20.9832	21.497	21.0198	21.1868	20.4111	NaN	20.9958	0.263821	0.483813
Glycine--tRNA ligase	GARS	P41250	P41250	adenyl nucleotide binding;adenyl ribonucleotide binding;aminoacyl-tRNA ligase activity;ATP binding;binding;catalytic activity;glycine-tRNA ligase activity;ligase activity;ligase activity, forming aminoacyl-tRNA and related compounds;ligase activity, forming carbon-oxygen bonds;nucleotide binding;protein binding;protein dimerization activity;purine nucleotide binding;purine ribonucleoside triphosp…	HGTP_anticodon;tRNA-synt_2b;WHEP-TRS	7	7	7	17.9	17.9	17.9	83.165	0	13.998	40769000	16	22.0525	20.0431	19.8582	21.7275	20.9317	NaN	22.1807	NaN	-0.635877	0.274403
Trifunctional purine biosynthetic protein adenosine-3;Phosphoribosylamine--glycine ligase;Phosphoribosylformylglycinamidine cyclo-ligase;Phosphoribosylglycinamide formyltransferase	GART	P22102;P22102-2;F8WD69;C9JBJ1;C9JTV6;C9JZG2;C9JKQ7;H7C366	P22102;P22102-2	adenyl nucleotide binding;adenyl ribonucleotide binding;ATP binding;binding;catalytic activity;cation binding;cyclo-ligase activity;hydroxymethyl-, formyl- and related transferase activity;ion binding;ligase activity;ligase activity, forming carbon-nitrogen bonds;metal ion binding;methyltransferase activity;nucleotide binding;phosphoribosylamine-glycine ligase activity;phosphoribosylformylglycina…	AIRS;AIRS_C;Formyl_trans_N;GARS_A;GARS_C;GARS_N	18	18	18	28.4	28.4	28.4	107.77	0	99.342	307030000	110	24.4153	23.9962	23.8894	24.7907	24.1515	23.9721	24.1302	23.6428	0.29874	0.592724
Protein NipSnap homolog 2	GBAS	O75323;H7C333;O75323-2;C9K068;C9J7B1;F8WBI5	O75323;H7C333;O75323-2		NIPSNAP	11	11	11	50	50	50	33.742	0	71.257	600210000	151	25.1329	24.897	24.6024	24.7104	25.1121	24.8004	25.0967	24.9834	-0.16247	0.553562
Glutaryl-CoA dehydrogenase, mitochondrial	GCDH	Q92947;Q92947-2;K7EKT3;K7ESA6;K7EKH1;K7ES74;K7EQ99;K7ERX1	Q92947;Q92947-2	acyl-CoA dehydrogenase activity;binding;carboxylic acid binding;catalytic activity;coenzyme binding;cofactor binding;fatty acid binding;fatty-acyl-CoA binding;flavin adenine dinucleotide binding;glutaryl-CoA dehydrogenase activity;lipid binding;monocarboxylic acid binding;oxidoreductase activity;oxidoreductase activity, acting on the CH-CH group of donors	Acyl-CoA_dh_1;Acyl-CoA_dh_M;Acyl-CoA_dh_N	18	18	18	63.9	63.9	63.9	48.127	0	145.54	863030000	224	25.7538	25.5124	25.4401	25.4933	25.7691	25.4533	25.6089	25.6652	-0.0742154	0.329323
Translational activator GCN1	GCN1L1	Q92616	Q92616	binding;nucleic acid binding;RNA binding;translation factor activity, nucleic acid binding	DUF3554	32	32	32	19.7	19.7	19.7	292.75	0	83.258	708420000	237	25.2942	25.4958	25.3395	25.0851	25.4404	25.1842	25.502	25.5609	-0.11822	0.44719
Rab GDP dissociation inhibitor beta	GDI2	P50395;Q5SX91;Q5SX87;V9GYF8;Q5SX90;P31150;V9GYJ7;Q5SX86	P50395	enzyme activator activity;enzyme regulator activity;GDP-dissociation inhibitor activity;GTPase activator activity;GTPase regulator activity;nucleoside-triphosphatase regulator activity;Rab GDP-dissociation inhibitor activity;small GTPase regulator activity	GDI	7	7	1	27.4	27.4	4.9	50.663	0	7.2188	41883000	16	21.8742	NaN	21.3754	22.832	21.8768	NaN	21.4418	NaN	0.367889	0.245757
Lactoylglutathione lyase	GLO1	Q04760-2;Q04760	Q04760-2;Q04760	binding;carbon-sulfur lyase activity;catalytic activity;cation binding;ion binding;lactoylglutathione lyase activity;lyase activity;metal ion binding;transition metal ion binding;zinc ion binding	Glyoxalase	5	5	5	37.3	37.3	37.3	19.043	0	13.308	61759000	17	22.3797	21.7435	NaN	24.3696	21.9464	NaN	21.9024	NaN	0.906547	0.35646
Glutamate dehydrogenase 1, mitochondrial;Glutamate dehydrogenase 2, mitochondrial	GLUD1;GLUD2	P00367-3;P00367;P00367-2;P49448	P00367-3;P00367;P00367-2;P49448	adenyl nucleotide binding;adenyl ribonucleotide binding;ADP binding;amine binding;amino acid binding;ATP binding;binding;carboxylic acid binding;catalytic activity;coenzyme binding;cofactor binding;glutamate dehydrogenase (NAD+) activity;glutamate dehydrogenase [NAD(P)+] activity;GTP binding;guanyl nucleotide binding;guanyl ribonucleotide binding;identical protein binding;leucine binding;NAD bind…	ELFV_dehydrog;ELFV_dehydrog_N	5	5	5	20.2	20.2	20.2	46.575	0	19.405	53466000	40	21.9115	21.3673	NaN	21.9915	21.8072	NaN	22.1269	21.6946	-0.119467	0.195226
GMP synthase [glutamine-hydrolyzing]	GMPS	P49915;P49915-2	P49915;P49915-2	adenyl nucleotide binding;adenyl ribonucleotide binding;ATP binding;binding;carbon-nitrogen ligase activity, with glutamine as amido-N-donor;catalytic activity;GMP synthase (glutamine-hydrolyzing) activity;GMP synthase activity;hydrolase activity;hydrolase activity, acting on acid anhydrides;hydrolase activity, acting on acid anhydrides, in phosphorus-containing anhydrides;ligase activity;ligase …	GATase;GMP_synt_C;NAD_synthase	4	4	4	9.5	9.5	9.5	76.715	0	5.2025	26063000	14	NaN	20.6577	20.812	NaN	20.0646	NaN	NaN	NaN	0.670235	0
Guanine nucleotide-binding protein subunit beta-2-like 1;Guanine nucleotide-binding protein subunit beta-2-like 1, N-terminally processed	GNB2L1	P63244;J3KPE3;H0YAF8;D6RHH4;H0YAM7;D6RAC2;H0Y8W2;D6REE5;D6RBD0;D6RFX4;D6RFZ9;D6R9Z1;D6R9L0;D6RAU2;E9PD14;D6RGK8;D6RF23;D6R909;H0Y8R5;D6RDI0;H0Y9P0;D6RHJ5	P63244;J3KPE3;H0YAF8;D6RHH4;H0YAM7;D6RAC2;H0Y8W2;D6REE5;D6RBD0;D6RFX4;D6RFZ9;D6R9Z1;D6R9L0	apoptotic protease activator activity;binding;binding, bridging;caspase activator activity;caspase regulator activity;channel inhibitor activity;channel regulator activity;enzyme activator activity;enzyme binding;enzyme inhibitor activity;enzyme regulator activity;identical protein binding;ion channel inhibitor activity;kinase binding;kinase inhibitor activity;kinase regulator activity;peptidase …	WD40	7	7	7	36.9	36.9	36.9	35.076	0	10.368	98130000	38	23.0489	21.8064	NaN	23.733	22.5099	NaN	22.6053	21.9769	0.498744	0.346442
Guanine nucleotide-binding protein-like 3	GNL3	Q9BVP2-2;Q9BVP2	Q9BVP2-2;Q9BVP2	binding;catalytic activity;GTP binding;GTPase activity;guanyl nucleotide binding;guanyl ribonucleotide binding;hydrolase activity;hydrolase activity, acting on acid anhydrides;hydrolase activity, acting on acid anhydrides, in phosphorus-containing anhydrides;nucleoside-triphosphatase activity;nucleotide binding;purine nucleotide binding;purine ribonucleoside triphosphate binding;purine ribonucleo…	GN3L_Grn1;MMR_HSR1	4	4	4	10.2	10.2	10.2	60.54	0	6.4019	25911000	9	20.4356	20.441	NaN	20.6832	20.7538	21.4177	NaN	20.6243	-0.411996	0.728569
Aspartate aminotransferase, mitochondrial	GOT2	P00505;P00505-2	P00505;P00505-2	binding;catalytic activity;cofactor binding;kynurenine-oxoglutarate transaminase activity;L-aspartate:2-oxoglutarate aminotransferase activity;L-phenylalanine aminotransferase activity;L-phenylalanine:2-oxoglutarate aminotransferase activity;pyridoxal phosphate binding;transaminase activity;transferase activity;transferase activity, transferring nitrogenous groups;vitamin B6 binding;vitamin bindi…	Aminotran_1_2	5	5	5	17.2	17.2	17.2	47.517	0	5.4034	167940000	9	23.7511	NaN	NaN	24.5008	23.0693	NaN	23.0722	NaN	1.05518	0.973004
Glycerol-3-phosphate dehydrogenase, mitochondrial	GPD2	P43304-2;P43304;F5GYK7	P43304-2;P43304	binding;calcium ion binding;catalytic activity;cation binding;glycerol-3-phosphate dehydrogenase activity;ion binding;metal ion binding;oxidoreductase activity;oxidoreductase activity, acting on CH-OH group of donors;oxidoreductase activity, acting on the CH-OH group of donors, quinone or similar compound as acceptor;sn-glycerol-3-phosphate:ubiquinone oxidoreductase activity;sn-glycerol-3-phospha…	DAO;EF-hand_7	3	3	3	8.5	8.5	8.5	67.531	0	10.237	33400000	16	NaN	21.3218	NaN	21.641	NaN	NaN	NaN	NaN	NaN	0
Glucose-6-phosphate isomerase	GPI	P06744;K7EQ48;A0A0A0MTS2;P06744-2;K7ENA0;K7EPY4;CON__Q3ZBD7;K7EP41;K7ERC6;K7ERK8;K7ELR7;K7ESF4	P06744;K7EQ48;A0A0A0MTS2;P06744-2	binding;carbohydrate binding;catalytic activity;glucose-6-phosphate isomerase activity;intramolecular oxidoreductase activity;intramolecular oxidoreductase activity, interconverting aldoses and ketoses;intramolecular transferase activity;isomerase activity;monosaccharide binding;sugar binding	PGI	11	11	11	26.9	26.9	26.9	63.146	0	31.056	182890000	90	23.9559	22.7468	22.9028	24.7467	22.898	NaN	23.5282	22.766	0.524011	0.381583
Putative Golgi pH regulator C;Golgi pH regulator A;Golgi pH regulator B	GPR89C;GPR89A;GPR89B	A6NKF9;B7ZAQ6-2;B7ZAQ6-3;P0CG08;B7ZAQ6;A0A087WW78;A0A087WW82	A6NKF9;B7ZAQ6-2;B7ZAQ6-3;P0CG08;B7ZAQ6	anion channel activity;anion transmembrane transporter activity;channel activity;gated channel activity;ion channel activity;ion transmembrane transporter activity;molecular transducer activity;passive transmembrane transporter activity;signal transducer activity;substrate-specific channel activity;substrate-specific transmembrane transporter activity;substrate-specific transporter activity;trans…	ABA_GPCR;DUF3735	5	5	3	19.4	19.4	13.1	36.67	0	29.787	264450000	64	23.9586	23.658	23.9787	23.686	23.9381	23.7677	23.8955	23.7629	-0.0207443	0.0770512
Growth factor receptor-bound protein 2	GRB2	P62993;P62993-2;J3KT38	P62993;P62993-2	binding;binding, bridging;cytokine receptor binding;enzyme binding;ephrin receptor binding;epidermal growth factor receptor binding;growth factor receptor binding;identical protein binding;insulin receptor substrate binding;kinase binding;neurotrophin receptor binding;neurotrophin TRK receptor binding;neurotrophin TRKA receptor binding;protein binding;protein binding, bridging;protein domain spec…	SH2;SH3_1	3	3	3	22.1	22.1	22.1	25.206	0	3.2283	35003000	12	21.5764	NaN	21.0573	21.3562	21.3404	21.6895	NaN	21.4568	-0.165615	0.382475
GrpE protein homolog 1, mitochondrial	GRPEL1	Q9HAV7	Q9HAV7	adenyl nucleotide binding;adenyl-nucleotide exchange factor activity;ATPase regulator activity;binding;enzyme regulator activity;nucleoside-triphosphatase regulator activity;nucleotide binding;protein binding;purine nucleotide binding;unfolded protein binding	GrpE	2	2	2	10.1	10.1	10.1	24.279	0.00083195	2.9091	7335000	6	20.3456	NaN	NaN	21.2109	NaN	NaN	NaN	NaN	NaN	0
Glycogen synthase kinase-3 alpha	GSK3A	P49840;A8MT37;M0QYV0	P49840;A8MT37	adenyl nucleotide binding;adenyl ribonucleotide binding;ATP binding;binding;catalytic activity;enzyme binding;kinase activity;kinase binding;nucleotide binding;phosphotransferase activity, alcohol group as acceptor;protein binding;protein kinase A binding;protein kinase A catalytic subunit binding;protein kinase activity;protein kinase binding;protein serine/threonine kinase activity;purine nucle…	Pkinase	42	42	29	77.2	77.2	62.7	50.98	0	323.31	13972000000	1158	29.5085	29.4812	29.6017	29.06	29.2422	29.4648	29.0059	29.4199	0.129648	0.350116
Glycogen synthase kinase-3 beta	GSK3B	P49841-2;P49841	P49841-2;P49841	adenyl nucleotide binding;adenyl ribonucleotide binding;ATP binding;beta-catenin binding;binding;catalytic activity;enzyme binding;kinase activity;kinase binding;NF-kappaB binding;nucleotide binding;p53 binding;phosphotransferase activity, alcohol group as acceptor;protein binding;protein kinase A binding;protein kinase A catalytic subunit binding;protein kinase activity;protein kinase binding;pr…	Pkinase	37	24	24	81.5	65.4	65.4	48.033	0	323.31	8779200000	660	28.8717	28.8461	28.9422	28.5894	28.6696	28.893	28.348	28.6041	0.183661	0.64635
GSK3-beta interaction protein	GSKIP	Q9P0R6;G3V4I5;G3V368	Q9P0R6;G3V4I5;G3V368		DUF727	7	7	7	63.3	63.3	63.3	15.648	0	41.836	488880000	135	24.6374	24.5398	24.7064	24.6224	24.9062	25.0995	24.4232	24.8662	-0.19729	0.642088
Glutathione reductase, mitochondrial	GSR	P00390-4;P00390-2;P00390;P00390-5;P00390-3;E5RI06;H0YC68	P00390-4;P00390-2;P00390;P00390-5;P00390-3	antioxidant activity;binding;catalytic activity;coenzyme binding;cofactor binding;disulfide oxidoreductase activity;electron carrier activity;flavin adenine dinucleotide binding;glutathione disulfide oxidoreductase activity;glutathione-disulfide reductase activity;NADP binding;nucleotide binding;oxidoreductase activity;oxidoreductase activity, acting on a sulfur group of donors;oxidoreductase act…	Pyr_redox;Pyr_redox_2;Pyr_redox_dim	6	6	6	24.3	24.3	24.3	50.496	0	28.837	101040000	49	22.2168	22.852	22.8036	22.6487	22.8042	22.3011	22.5433	22.4765	0.0990067	0.222866
Glutathione S-transferase P	GSTP1	P09211;A8MX94;A0A087X2E9;A0A087X243	P09211;A8MX94;A0A087X2E9	binding;catalytic activity;dinitrosyl-iron complex binding;enzyme binding;enzyme regulator activity;glutathione transferase activity;JUN kinase binding;kinase binding;kinase regulator activity;nitric oxide binding;protein binding;protein kinase binding;S-nitrosoglutathione binding;transferase activity;transferase activity, transferring alkyl or aryl (other than methyl) groups	GST_C;GST_N	10	10	10	53.8	53.8	53.8	23.356	0	58.995	353370000	58	24.8557	23.8581	23.9045	25.975	24.4097	23.9699	24.0986	NaN	0.488946	0.344871
Core histone macro-H2A.1;Histone H2A	H2AFY	O75367-2;O75367-3;O75367;B4DJC3;D6RCF2;Q5SQT3	O75367-2;O75367-3;O75367;B4DJC3	binding;chromatin binding;chromatin DNA binding;core promoter binding;core promoter sequence-specific DNA binding;DNA binding;double-stranded DNA binding;double-stranded methylated DNA binding;enzyme binding;enzyme inhibitor activity;enzyme regulator activity;kinase binding;kinase inhibitor activity;kinase regulator activity;nucleic acid binding;nucleosomal DNA binding;nucleosome binding;protein …	Histone;Macro	12	12	10	44.4	44.4	37.4	39.183	0	43.489	276110000	95	22.6017	23.6469	23.8524	23.6546	23.1554	25.1599	23.7171	24.1039	-0.595178	0.542918
Histone H2A.Z	H2AFZ	P0C0S5;Q71UI9-3;C9J386;Q71UI9-5	P0C0S5	binding;chromatin binding;chromatin DNA binding;core promoter binding;core promoter proximal region DNA binding;core promoter proximal region sequence-specific DNA binding;core promoter sequence-specific DNA binding;DNA binding;enhancer binding;enhancer sequence-specific DNA binding;nucleic acid binding;nucleosomal DNA binding;nucleosome binding;regulatory region DNA binding;regulatory region nuc…	Histone	8	6	1	62.5	62.5	28.9	13.553	0	161.07	2155600000	139	26.147	26.7537	26.7661	26.1464	26.3604	27.9442	27.2665	27.1199	-0.719442	1.00079
Histone H3;Histone H3.3;Histone H3.1t	H3F3B;H3F3A;HIST3H3	K7EK07;P84243;K7EMV3;B4DEB1;K7ES00;Q16695;Q6NXT2;K7EP01	K7EK07;P84243;K7EMV3;B4DEB1;K7ES00;Q16695	binding;chromatin binding;chromatin DNA binding;core promoter binding;core promoter sequence-specific DNA binding;DNA binding;enhancer binding;enhancer sequence-specific DNA binding;histone binding;nucleic acid binding;nucleosomal DNA binding;nucleosome binding;protein binding;regulatory region DNA binding;regulatory region nucleic acid binding;RNA polymerase II core promoter sequence-specific DN…	Histone	11	2	2	59.8	27.3	27.3	14.914	0	82.181	747730000	101	24.3374	25.2599	25.2276	25.2105	24.4668	26.963	25.2417	25.5022	-0.534574	0.416978
Very-long-chain (3R)-3-hydroxyacyl-CoA dehydratase 3	HACD3	Q9P035;H3BS72;H3BPZ1;Q9P035-2;H3BMZ1;H3BRL8	Q9P035;H3BS72;H3BPZ1	3-hydroxyacyl-CoA dehydratase activity;binding;carbon-oxygen lyase activity;catalytic activity;enzyme activator activity;enzyme binding;enzyme regulator activity;GTPase activator activity;GTPase regulator activity;hydro-lyase activity;lyase activity;nucleoside-triphosphatase regulator activity;protein binding	CS;PTPLA	15	15	15	37.3	37.3	37.3	43.159	0	140.09	1750300000	267	26.2604	26.6871	26.6352	26.2688	26.693	26.6134	26.7401	26.7397	-0.233657	1.01445
Hydroxyacyl-coenzyme A dehydrogenase, mitochondrial	HADH	A0A0A0MSE2;Q16836;Q16836-3;Q16836-2;E9PF18	A0A0A0MSE2;Q16836;Q16836-3;Q16836-2;E9PF18	3-hydroxyacyl-CoA dehydrogenase activity;binding;catalytic activity;coenzyme binding;cofactor binding;NAD binding;NAD+ binding;nucleotide binding;oxidoreductase activity;oxidoreductase activity, acting on CH-OH group of donors;oxidoreductase activity, acting on the CH-OH group of donors, NAD or NADP as acceptor	3HCDH;3HCDH_N	2	2	2	17.2	17.2	17.2	42.123	0	58.039	26542000	9	21.335	NaN	NaN	22.4444	21.1992	NaN	NaN	NaN	0.690501	0
Trifunctional enzyme subunit alpha, mitochondrial;Long-chain enoyl-CoA hydratase;Long chain 3-hydroxyacyl-CoA dehydrogenase	HADHA	P40939;P40939-2;H0YFD6	P40939	3-hydroxyacyl-CoA dehydrogenase activity;acetyl-CoA C-acetyltransferase activity;acetyl-CoA C-acyltransferase activity;acetyltransferase activity;binding;C-acetyltransferase activity;C-acyltransferase activity;carbon-oxygen lyase activity;carboxylic acid binding;catalytic activity;coenzyme binding;cofactor binding;enoyl-CoA hydratase activity;fatty acid binding;fatty-acyl-CoA binding;hydro-lyase …	3HCDH;3HCDH_N;ECH	9	9	9	21	21	21	82.999	0	57.309	49818000	22	22.2275	22.0098	NaN	23.4134	NaN	21.6912	22.5347	NaN	0.437265	0.262537
Trifunctional enzyme subunit beta, mitochondrial;3-ketoacyl-CoA thiolase	HADHB	B5MD38;F5GZQ3;P55084-2;P55084;C9JEY0;C9JE81	B5MD38;F5GZQ3;P55084-2;P55084	3-hydroxyacyl-CoA dehydrogenase activity;acetyl-CoA C-acyltransferase activity;binding;C-acyltransferase activity;carbon-oxygen lyase activity;carboxylic acid binding;catalytic activity;coenzyme binding;cofactor binding;enoyl-CoA hydratase activity;fatty acid binding;fatty-acyl-CoA binding;hydro-lyase activity;lipid binding;long-chain-3-hydroxyacyl-CoA dehydrogenase activity;long-chain-enoyl-CoA …	Thiolase_C;Thiolase_N	5	5	5	33	33	33	37.924	0	37.951	44983000	15	21.9148	NaN	21.8427	22.2027	NaN	21.7885	NaN	NaN	0.198245	0
Hydroxyacylglutathione hydrolase-like protein	HAGHL	Q6PII5-2;H3BN70;I3L3H5;H3BQ57;H3BT20;B4DED4;Q6PII5-3;Q6PII5-4;Q6PII5	Q6PII5-2;H3BN70;I3L3H5;H3BQ57;H3BT20;B4DED4;Q6PII5-3;Q6PII5-4;Q6PII5	binding;catalytic activity;cation binding;hydrolase activity;hydrolase activity, acting on ester bonds;hydroxyacylglutathione hydrolase activity;ion binding;metal ion binding;thiolester hydrolase activity;transition metal ion binding;zinc ion binding	Lactamase_B	3	3	3	16.3	16.3	16.3	31.233	0	7.7528	21374000	15	21.6057	20.6724	NaN	NaN	21.2202	NaN	NaN	NaN	-0.0811462	0
Histone deacetylase 1	HDAC1;HDAC2	Q13547;E5RFI6;E5RJ04;E5RGV4;E5RHE7;E5RH52;E5RG37;E5RFP9;H3BM24;Q5TEE2;E5RK19	Q13547;E5RFI6;E5RJ04;E5RGV4;E5RHE7;E5RH52;E5RG37;E5RFP9;H3BM24;Q5TEE2	activating transcription factor binding;binding;catalytic activity;core promoter binding;deacetylase activity;DNA binding;enzyme binding;histone deacetylase activity;histone deacetylase activity (H3-K14 specific);histone deacetylase activity (H3-K9 specific);histone deacetylase binding;hydrolase activity;hydrolase activity, acting on carbon-nitrogen (but not peptide) bonds;hydrolase activity, act…	Hist_deacetyl	4	4	2	13.7	13.7	8.3	55.102	0	15.017	42715000	21	21.4807	21.1842	21.2854	21.2375	NaN	21.7639	21.6756	21.587	-0.378507	2.12111
Hepatoma-derived growth factor-related protein 2	HDGFRP2	Q7Z4V5-2;Q7Z4V5;Q7Z4V5-4;Q7Z4V5-3;K7EPS6;K7ERA4;M0R0J3;A0A087WX58;A0A087WT54	Q7Z4V5-2;Q7Z4V5;Q7Z4V5-4;Q7Z4V5-3;K7EPS6;K7ERA4	binding;chromatin binding;DNA binding;nucleic acid binding	LEDGF;PWWP	10	10	10	18.2	18.2	18.2	74.229	0	108.78	637680000	120	25.3507	25.6069	25.5757	25.1549	25.722	25.5808	25.4526	25.5639	-0.157773	0.630115
HIG1 domain family member 1A, mitochondrial	HIGD1A	C9JAW5;C9JNU6;Q9Y241;Q9Y241-2	C9JAW5;C9JNU6;Q9Y241		HIG_1_N	5	5	5	55.4	55.4	55.4	8.8131	0	51.433	237110000	118	23.7825	23.346	23.3303	23.205	23.9596	24.021	24.285	23.7864	-0.597048	1.97554
HIRA-interacting protein 3	HIRIP3	Q9BW71-3;Q9BW71-2;Q9BW71	Q9BW71-3;Q9BW71-2;Q9BW71		CHZ	2	2	2	18.9	18.9	18.9	19.709	0	3.3251	77260000	13	22.5844	22.499	22.2711	NaN	22.692	22.5419	22.6708	22.2745	-0.0933073	0.276747
Histone H1.2	HIST1H1C	P16403	P16403	binding;chromatin binding;chromatin DNA binding;DNA binding;nucleic acid binding;structure-specific DNA binding	Linker_histone	8	2	2	37.1	9.4	9.4	21.364	0	14.941	71519000	39	21.6733	21.7181	21.1202	21.8472	NaN	22.9529	21.9764	22.1175	-0.759241	1.20313
Histone H1.4;Histone H1.3	HIST1H1E;HIST1H1D	P10412;P16402;Q02539;P22492;P16401	P10412;P16402	binding;chromatin binding;chromatin DNA binding;DNA binding;enzyme binding;histone deacetylase binding;nucleic acid binding;protein binding;structure-specific DNA binding	Linker_histone	9	9	3	37	37	15.5	21.865	0	24.279	461900000	68	24.0271	24.0945	24.237	24.4329	24.1316	25.6637	24.4492	24.5426	-0.498893	0.700361
Histone H2A type 1-J;Histone H2A type 1-H;Histone H2A.J;Histone H2A type 1;Histone H2A	HIST1H2AJ;HIST1H2AH;H2AFJ;HIST1H2AG	Q99878;Q96KK5;Q9BTM1;P0C0S8;Q9BTM1-2;H0YFX9	Q99878;Q96KK5;Q9BTM1;P0C0S8;Q9BTM1-2;H0YFX9	binding;DNA binding;enzyme binding;nucleic acid binding;protein binding	Histone	13	13	0	75	75	0	13.936	0	264.79	9453000000	373	28.0529	28.4405	28.612	28.4336	28.3117	30.0454	28.7224	29.22	-0.690137	0.892105
Histone H2B;Histone H2B type 1-M;Histone H2B type 1-N;Histone H2B type 1-H;Histone H2B type 2-F;Histone H2B type 1-C/E/F/G/I;Histone H2B type 1-D;Histone H2B type 1-K;Histone H2B type 1-L;Histone H2B type F-S	HIST1H2BN;HIST1H2BM;HIST1H2BH;HIST2H2BF;HIST1H2BC;HIST1H2BD;HIST1H2BK;HIST1H2BL;H2BFS	U3KQK0;Q99879;Q99877;Q93079;Q5QNW6;P62807;P58876;Q5QNW6-2;O60814;Q99880;P57053	U3KQK0;Q99879;Q99877;Q93079;Q5QNW6;P62807;P58876;Q5QNW6-2;O60814;Q99880;P57053	binding;DNA binding;nucleic acid binding	Histone	14	14	3	56.6	56.6	7.2	18.804	0	94.19	11656000000	316	28.2192	28.4583	28.7996	28.5781	28.5313	30.1094	28.9679	29.3592	-0.728141	1.06105
Histone H3.1	HIST1H3A	P68431	P68431	binding;DNA binding;histone binding;nucleic acid binding;protein binding	Histone	12	12	3	58.1	58.1	27.2	15.404	0	153.43	7942100000	390	27.8413	28.5249	28.5719	28.3976	28.1082	29.8388	28.5066	28.8282	-0.486537	0.558367
Histone H4	HIST1H4A	P62805	P62805	binding;catalytic activity;demethylase activity;DNA binding;histone binding;histone demethylase activity;histone demethylase activity (H4-K20 specific);nucleic acid binding;protein binding	Histone	16	16	16	68.9	68.9	68.9	11.367	0	59.52	21173000000	542	29.3244	29.9185	29.8527	29.8195	29.4411	31.3716	29.987	30.2943	-0.54471	0.600681
Histone H2A type 2-C;Histone H2A type 2-A	HIST2H2AC;HIST2H2AA3	Q16777;Q6FI13	Q16777;Q6FI13	binding;DNA binding;nucleic acid binding	Histone	12	2	2	74.4	25.6	25.6	13.988	0	96.476	1485900000	61	25.7521	26.8452	26.651	26.6893	25.5876	27.6386	26.9434	24.5158	0.313053	0.163098
Histone H2B type 2-E;Histone H2B type 1-B;Histone H2B type 1-O;Histone H2B type 1-J	HIST2H2BE;HIST1H2BB;HIST1H2BO;HIST1H2BJ	Q16778;P33778;P23527;P06899;Q96A08;Q6DRA6;Q6DN03	Q16778;P33778;P23527;P06899	binding;DNA binding;nucleic acid binding	Histone	14	3	1	74.6	9.5	9.5	13.92	0	5.1655	870480000	64	24.6307	24.8749	25.3784	24.8411	24.9698	26.3538	25.4205	25.4701	-0.622252	0.965044
Histone H3.2	HIST2H3A	Q71DI3	Q71DI3	binding;DNA binding;histone binding;nucleic acid binding;protein binding	Histone	12	3	3	58.1	27.2	27.2	15.388	0	88.238	2302000000	229	25.9515	26.8207	26.7331	26.5923	26.2724	27.5958	26.5247	26.6768	-0.243002	0.290364
Helicase-like transcription factor	HLTF	A0A0C4DGA6;Q14527-2;Q14527;H7C5K0	A0A0C4DGA6;Q14527-2;Q14527;H7C5K0	adenyl nucleotide binding;adenyl ribonucleotide binding;ATP binding;ATPase activity;binding;catalytic activity;cation binding;DNA binding;helicase activity;hydrolase activity;hydrolase activity, acting on acid anhydrides;hydrolase activity, acting on acid anhydrides, in phosphorus-containing anhydrides;ion binding;ligase activity;metal ion binding;nucleic acid binding;nucleoside-triphosphatase ac…	Helicase_C;HIRAN;SNF2_N;zf-RING_2	3	3	3	5.1	5.1	5.1	113.86	0	7.2489	22433000	36	20.5562	20.4936	NaN	NaN	20.8824	21.0112	20.8002	20.9119	-0.376549	2.28175
High mobility group protein HMG-I/HMG-Y	HMGA1	P17096;P17096-3	P17096;P17096-3	5'-deoxyribose-5-phosphate lyase activity;AT DNA binding;binding;carbon-oxygen lyase activity;catalytic activity;DNA binding;DNA-(apurinic or apyrimidinic site) lyase activity;enzyme binding;hormone receptor binding;ligand-dependent nuclear receptor transcription coactivator activity;lyase activity;nuclear hormone receptor binding;nucleic acid binding;peroxisome proliferator activated receptor bi…	AT_hook	3	3	1	43.9	43.9	23.4	11.676	0	37.857	94242000	38	21.8991	22.5522	21.6089	21.8919	22.1966	23.0948	21.9773	22.7988	-0.528831	0.803028
High mobility group protein B1;Putative high mobility group protein B1-like 1	HMGB1;HMGB1P1	Q5T7C4;P09429;B2RPK0	Q5T7C4;P09429;B2RPK0	binding;chemoattractant activity;chromatin binding;cytokine activity;damaged DNA binding;DNA bending activity;DNA binding;double-stranded DNA binding;nucleic acid binding;nucleic acid binding transcription factor activity;protein binding;RAGE receptor binding;receptor binding;repressing transcription factor binding;sequence-specific DNA binding transcription factor activity;single-stranded DNA bi…	HMG_box;HMG_box_2	9	9	7	63.3	63.3	48.1	18.311	0	22.741	366600000	61	24.7525	24.5009	23.8643	25.6305	24.2326	NaN	24.7548	24.0434	0.343511	0.304583
High mobility group protein B2	HMGB2	P26583;D6R9A6	P26583;D6R9A6	binding;chemoattractant activity;chromatin binding;damaged DNA binding;DNA bending activity;DNA binding;double-stranded DNA binding;nucleic acid binding;nucleic acid binding transcription factor activity;protein binding;RAGE receptor binding;receptor binding;regulatory region DNA binding;regulatory region nucleic acid binding;sequence-specific DNA binding transcription factor activity;single-stra…	HMG_box;HMG_box_2	3	2	2	20.6	12.9	12.9	24.033	0	3.6929	63681000	13	NaN	22.2302	NaN	22.6716	NaN	NaN	NaN	21.9306	0.52033	0
Heterogeneous nuclear ribonucleoprotein A1;Heterogeneous nuclear ribonucleoprotein A1, N-terminally processed	HNRNPA1	F8W6I7;P09651-3;P09651-2;P09651;H0YH80;F8VTQ5;F8W646;F8VZ49;Q32P51	F8W6I7;P09651-3;P09651-2;P09651;H0YH80	binding;DNA binding;nucleic acid binding;nucleotide binding;RNA binding;single-stranded DNA binding;single-stranded RNA binding;structure-specific DNA binding	HnRNPA1;RRM_1	5	5	5	23.1	23.1	23.1	33.155	0	10.659	123200000	40	22.4031	23.7064	22.6915	23.1479	22.1674	23.1372	23.3097	23.0105	0.0810347	0.0763754
Heterogeneous nuclear ribonucleoproteins A2/B1	HNRNPA2B1	P22626;P22626-2;A0A087WUI2	P22626;P22626-2;A0A087WUI2	binding;DNA binding;nucleic acid binding;nucleotide binding;RNA binding;sequence-specific DNA binding;single-stranded DNA binding;single-stranded telomeric DNA binding;structure-specific DNA binding;telomeric DNA binding	RRM_1	13	13	13	47	47	47	37.429	0	62.103	309580000	77	23.9866	24.5272	23.856	24.2741	23.3339	24.4059	24.8059	24.1748	-0.0190988	0.0187883
Heterogeneous nuclear ribonucleoprotein A3	HNRNPA3	P51991-2;P51991	P51991-2;P51991	binding;nucleic acid binding;nucleotide binding;RNA binding	RRM_1	3	3	3	16.3	16.3	16.3	37.029	0	4.8195	93374000	11	23.0087	22.8467	NaN	NaN	NaN	23.1777	23.1968	23.1769	-0.256068	1.60892
Heterogeneous nuclear ribonucleoproteins C1/C2	HNRNPC	G3V4W0;B4DY08;B2R5W2;G3V4C1;P07910-2;G3V576;G3V2Q1;P07910-4;P07910;G3V251;G3V555;G3V575;G3V5X6;G3V3K6;B4DSU6;G3V4M8;P07910-3;G3V2H6;A0A0G2JPF8;A0A0G2JNQ3;P0DMR1;O60812;B7ZW38;B2RXH8;G3V2D6;G3V5V7	G3V4W0;B4DY08;B2R5W2;G3V4C1;P07910-2;G3V576;G3V2Q1;P07910-4;P07910;G3V251;G3V555;G3V575;G3V5X6;G3V3K6;B4DSU6;G3V4M8;P07910-3	binding;chromatin binding;chromatin DNA binding;core promoter proximal region DNA binding;core promoter proximal region sequence-specific DNA binding;DNA binding;enhancer binding;enhancer sequence-specific DNA binding;identical protein binding;mRNA 3'-UTR binding;mRNA binding;nucleic acid binding;nucleosomal DNA binding;nucleosome binding;nucleotide binding;poly(U) RNA binding;poly-pyrimidine tra…	RRM_1	11	11	11	46.6	46.6	46.6	28.916	0	19.952	299770000	85	24.0299	23.8255	23.7975	24.0402	23.6475	24.7715	24.763	24.0709	-0.389935	0.661157
Heterogeneous nuclear ribonucleoprotein D0	HNRNPD	D6RAF8;H0Y8G5;Q14103-3;Q14103;H0YA96;Q14103-4;Q14103-2;D6RF44;D6RD83;D6RBQ9	D6RAF8;H0Y8G5;Q14103-3;Q14103;H0YA96;Q14103-4;Q14103-2;D6RF44;D6RD83	binding;DNA binding;nucleic acid binding;nucleotide binding;RNA binding;sequence-specific DNA binding;telomeric DNA binding	CBFNT;RRM_1	7	7	7	35.7	35.7	35.7	23.076	0	12.138	144750000	45	23.0917	23.0109	22.685	23.9782	22.6296	22.8271	23.4756	22.8617	0.242975	0.308572
Heterogeneous nuclear ribonucleoprotein D-like	HNRNPDL	A0A087WUK2;O14979-3;O14979-2;O14979	A0A087WUK2;O14979-3;O14979-2;O14979	binding;DNA binding;double-stranded DNA binding;mRNA binding;nucleic acid binding;nucleotide binding;poly(A) RNA binding;poly(G) RNA binding;poly-purine tract binding;RNA binding;single-stranded DNA binding;single-stranded RNA binding;structure-specific DNA binding	RRM_1	5	5	5	21.2	21.2	21.2	40.04	0	6.3701	41111000	8	21.561	21.1589	NaN	22.1657	NaN	21.7368	NaN	NaN	-0.108243	0
Heterogeneous nuclear ribonucleoprotein F;Heterogeneous nuclear ribonucleoprotein F, N-terminally processed	HNRNPF	P52597	P52597	binding;nucleic acid binding;nucleotide binding;RNA binding;single-stranded RNA binding	RRM_1;zf-RNPHF	6	5	5	33.7	27.2	27.2	45.671	0	23.048	189960000	40	23.3472	23.2223	23.6875	23.4736	23.0064	23.052	23.3651	23.4154	0.222937	0.759373
Heterogeneous nuclear ribonucleoprotein H;Heterogeneous nuclear ribonucleoprotein H, N-terminally processed	HNRNPH1	E9PCY7;G8JLB6;P31943;D6RBM0;D6RIU0;E5RGV0;D6RFM3;D6RIT2;E7EQJ0;D6RAM1;D6R9T0;E7EN40;D6RDU3;D6RJ04;D6RIH9;H0YB39;D6RDL0;D6RF17;E5RGH4;H0YBG7;H0YBD7;D6R9D3;E5RJ94;H0YAQ2	E9PCY7;G8JLB6;P31943;D6RBM0;D6RIU0;E5RGV0;D6RFM3;D6RIT2;E7EQJ0;D6RAM1;D6R9T0;E7EN40;D6RDU3;D6RJ04;D6RIH9	binding;nucleic acid binding;nucleotide binding;poly(U) RNA binding;poly-pyrimidine tract binding;RNA binding;single-stranded RNA binding	RRM_1;zf-RNPHF	14	14	10	50.8	50.8	38	47.087	0	48.654	501690000	148	24.6398	25.0779	24.6304	25.1078	24.7882	25.053	24.6216	24.8587	0.0336146	0.0756397
Heterogeneous nuclear ribonucleoprotein K	HNRNPK	P61978;P61978-2;P61978-3;Q5T6W2;S4R457;S4R359	P61978;P61978-2;P61978-3;Q5T6W2	binding;core promoter proximal region DNA binding;core promoter proximal region sequence-specific DNA binding;DNA binding;nucleic acid binding;nucleic acid binding transcription factor activity;regulatory region DNA binding;regulatory region nucleic acid binding;RNA binding;RNA polymerase II core promoter proximal region sequence-specific DNA binding;RNA polymerase II core promoter proximal regio…	KH_1;ROKNT	18	18	18	55.3	55.3	55.3	50.976	0	61.57	709550000	177	25.301	25.3404	24.9356	26.1449	25.0256	25.0703	25.2006	24.9639	0.365402	0.679185
Heterogeneous nuclear ribonucleoprotein M	HNRNPM	P52272-2;A0A087X0X3;P52272;M0R019;M0R2T0;M0R0N3;M0QZM1;M0QYQ7;M0QY96;M0R2I7;M0R0Y6;M0QYL3	P52272-2;A0A087X0X3;P52272	binding;nucleic acid binding;nucleotide binding;protein binding;protein domain specific binding;RNA binding	HnRNP_M;RRM_1	20	20	20	38.4	38.4	38.4	73.62	0	47.613	411580000	122	24.1403	24.1259	24.3205	24.7903	24.6179	25.0295	24.6595	24.6998	-0.407422	1.18142
Heterogeneous nuclear ribonucleoprotein U	HNRNPU	Q00839-2;Q00839;Q5RI18	Q00839-2;Q00839	adenyl nucleotide binding;adenyl ribonucleotide binding;ATP binding;binding;core promoter binding;DNA binding;nucleic acid binding;nucleotide binding;purine nucleotide binding;purine ribonucleoside triphosphate binding;purine ribonucleotide binding;regulatory region DNA binding;regulatory region nucleic acid binding;ribonucleotide binding;RNA binding;transcription regulatory region DNA binding	SAP;SPRY	24	24	24	36.7	36.7	36.7	88.979	0	73.808	804150000	203	25.1024	25.8244	25.484	25.2757	25.3049	25.7471	25.5523	25.5213	-0.109745	0.248808
Hypoxanthine-guanine phosphoribosyltransferase	HPRT1	P00492	P00492	binding;catalytic activity;cation binding;guanine phosphoribosyltransferase activity;hypoxanthine phosphoribosyltransferase activity;identical protein binding;ion binding;magnesium ion binding;metal ion binding;nucleotide binding;protein binding;protein dimerization activity;protein homodimerization activity;transferase activity;transferase activity, transferring glycosyl groups;transferase activ…	Pribosyltran	7	7	7	48.6	48.6	48.6	24.579	0	10.165	62749000	18	21.8858	21.9398	21.3597	22.8363	21.6621	21.3928	21.8105	NaN	0.38357	0.449561
3-hydroxyacyl-CoA dehydrogenase type-2	HSD17B10	Q99714;Q5H928;Q99714-2	Q99714;Q5H928;Q99714-2	3-hydroxy-2-methylbutyryl-CoA dehydrogenase activity;3-hydroxyacyl-CoA dehydrogenase activity;catalytic activity;cholate 7-alpha-dehydrogenase activity;oxidoreductase activity;oxidoreductase activity, acting on CH-OH group of donors;oxidoreductase activity, acting on the CH-OH group of donors, NAD or NADP as acceptor;steroid dehydrogenase activity;steroid dehydrogenase activity, acting on the CH-…	adh_short	5	5	5	36	36	36	26.923	0	26.289	47943000	22	22.5559	NaN	22.2604	22.4599	NaN	NaN	NaN	NaN	NaN	0
Very-long-chain 3-oxoacyl-CoA reductase	HSD17B12	Q53GQ0;E9PI21;Q53GQ0-2	Q53GQ0	binding;carbohydrate binding;catalytic activity;estradiol 17-beta-dehydrogenase activity;glycosaminoglycan binding;heparin binding;oxidoreductase activity;oxidoreductase activity, acting on CH-OH group of donors;oxidoreductase activity, acting on the CH-OH group of donors, NAD or NADP as acceptor;pattern binding;polysaccharide binding;steroid dehydrogenase activity;steroid dehydrogenase activity,…	adh_short	10	10	10	38.5	38.5	38.5	34.324	0	16.676	424850000	87	24.5283	24.8666	24.3951	23.9022	24.9409	24.5612	24.7741	24.6638	-0.311922	0.702112
Inactive hydroxysteroid dehydrogenase-like protein 1	HSDL1	Q3SXM5-2;Q3SXM5;H3BQI7;H3BT52	Q3SXM5-2;Q3SXM5;H3BQI7;H3BT52	catalytic activity;oxidoreductase activity	adh_short	7	7	7	34.2	34.2	34.2	30.86	0	11.899	119640000	55	22.4984	23.2007	22.6599	22.2314	23.0674	22.6736	23.2669	22.8716	-0.322273	0.639152
Heat shock protein HSP 90-alpha	HSP90AA1	P07900;P07900-2;G3V2J8;Q14568;Q58FG0;Q58FG1	P07900;P07900-2	adenyl deoxyribonucleotide binding;adenyl nucleotide binding;adenyl ribonucleotide binding;antigen binding;ATP binding;ATPase activity;binding;catalytic activity;CTP binding;dATP binding;deoxyribonucleotide binding;enzyme binding;enzyme regulator activity;GTP binding;GTPase binding;guanyl nucleotide binding;guanyl ribonucleotide binding;hydrolase activity;hydrolase activity, acting on acid anhydr…	HATPase_c;HSP90	54	37	37	73.1	54.1	54.1	84.659	0	182.3	1470800000	390	26.7956	25.7368	25.8875	27.4507	26.1907	25.6241	26.5382	25.9427	0.39373	0.38519
Heat shock protein HSP 90-beta	HSP90AB1	P08238;Q58FF7	P08238	adenyl nucleotide binding;adenyl ribonucleotide binding;antigen binding;ATP binding;binding;double-stranded RNA binding;enzyme binding;enzyme regulator activity;kinase binding;MHC class II protein complex binding;MHC protein complex binding;nitric-oxide synthase regulator activity;nucleic acid binding;nucleotide binding;protein binding;protein domain specific binding;purine nucleotide binding;pur…	HATPase_c;HSP90	63	63	43	78.7	78.7	61.6	83.263	0	323.31	5027100000	1037	28.4715	27.7334	27.8341	29.0912	28.0669	27.6391	28.2712	27.8095	0.335873	0.4348
Endoplasmin	HSP90B1	P14625;Q96GW1;H0YIV0;F8W026	P14625	adenyl nucleotide binding;adenyl ribonucleotide binding;ATP binding;binding;calcium ion binding;cation binding;enzyme binding;ion binding;lipoprotein particle receptor binding;low-density lipoprotein particle receptor binding;metal ion binding;nucleic acid binding;nucleotide binding;phosphatase binding;protein binding;protein phosphatase binding;purine nucleotide binding;purine ribonucleoside tri…	HSP90	21	19	19	31.3	29.1	29.1	92.468	0	42.507	163790000	86	23.9219	22.3464	22.8711	25.0209	23.4809	NaN	23.6166	22.0591	0.487882	0.239798
Heat shock 70 kDa protein 1B;Heat shock 70 kDa protein 1A	HSPA1B;HSPA1A	A0A0G2JIW1;P0DMV9;P0DMV8;P0DMV8-2;V9GZ37	A0A0G2JIW1;P0DMV9;P0DMV8;P0DMV8-2;V9GZ37		HSP70	45	42	29	79.1	75.4	57.2	70.108	0	323.31	4045800000	691	28.0434	27.9558	27.8686	28.4146	27.8851	27.7071	27.7711	27.8087	0.277579	1.15906
Heat shock 70 kDa protein 4	HSPA4	P34932;A0A087WYC1;A0A087WTS8;P34932-2	P34932;A0A087WYC1;A0A087WTS8	adenyl nucleotide binding;adenyl ribonucleotide binding;ATP binding;binding;nucleotide binding;purine nucleotide binding;purine ribonucleoside triphosphate binding;purine ribonucleotide binding;ribonucleotide binding	HSP70	13	13	12	24.5	24.5	24.5	94.33	0	26.239	78413000	38	23.0145	NaN	21.6937	24.3858	NaN	NaN	21.7807	NaN	1.25065	0
78 kDa glucose-regulated protein	HSPA5	P11021	P11021	adenyl nucleotide binding;adenyl ribonucleotide binding;ATP binding;ATPase activity;binding;calcium ion binding;catalytic activity;cation binding;chaperone binding;enzyme binding;glycoprotein binding;hydrolase activity;hydrolase activity, acting on acid anhydrides;hydrolase activity, acting on acid anhydrides, in phosphorus-containing anhydrides;ion binding;metal ion binding;misfolded protein bin…	HSP70	36	35	35	54.1	54.1	54.1	72.332	0	168.53	2360100000	509	27.2621	26.9977	27.1648	27.5568	27.1987	26.9553	27.0525	27.0708	0.176016	0.664098
Heat shock cognate 71 kDa protein	HSPA8	P11142;E9PKE3;P11142-2;E9PNE6;E9PN89;A8K7Q2;E9PLF4;E9PQQ4;E9PQK7;E9PK54;E9PPY6;E9PN25;E9PS65;P54652;E9PM13	P11142;E9PKE3;P11142-2;E9PNE6;E9PN89;A8K7Q2	adenyl nucleotide binding;adenyl ribonucleotide binding;antigen binding;ATP binding;ATPase activity;ATPase activity, coupled;binding;C3HC4-type RING finger domain binding;catalytic activity;enzyme binding;glycolipid binding;G-protein-coupled receptor binding;heat shock protein binding;hydrolase activity;hydrolase activity, acting on acid anhydrides;hydrolase activity, acting on acid anhydrides, i…	HSP70	51	51	34	75.4	75.4	54	70.897	0	323.31	6433500000	910	28.6907	28.6008	28.5896	29.0842	28.6373	28.4296	28.5426	28.4661	0.222426	0.899353
Stress-70 protein, mitochondrial	HSPA9	P38646;H0YBG6;D6RA73;D6RJI2;H0Y8S0	P38646	adenyl nucleotide binding;adenyl ribonucleotide binding;ATP binding;binding;enzyme binding;nucleotide binding;protein binding;purine nucleotide binding;purine ribonucleoside triphosphate binding;purine ribonucleotide binding;ribonucleotide binding;ubiquitin protein ligase binding;unfolded protein binding	HSP70	27	27	27	48.5	48.5	48.5	73.68	0	94.357	551580000	166	25.0805	24.8457	24.8691	25.6976	24.8784	24.8458	24.7557	24.7345	0.319612	0.785148
Heat shock protein beta-1	HSPB1	P04792;C9J3N8;F8WE04	P04792	binding;enzyme binding;enzyme inhibitor activity;enzyme regulator activity;identical protein binding;kinase binding;kinase inhibitor activity;kinase regulator activity;protein binding;protein kinase binding;protein kinase C binding;protein kinase C inhibitor activity;protein kinase inhibitor activity;protein kinase regulator activity;protein serine/threonine kinase inhibitor activity;small conjug…	HSP20	9	9	9	60	60	60	22.782	0	63.336	346700000	115	24.4529	23.6638	24.1687	25.1495	23.8305	23.9322	24.1548	24.0427	0.368662	0.537497
60 kDa heat shock protein, mitochondrial	HSPD1	P10809;E7ESH4;E7EXB4;P10809-2;C9JL25;C9JL19;C9JCQ4;C9J0S9	P10809	adenyl nucleotide binding;adenyl ribonucleotide binding;ATP binding;ATPase activity;binding;catalytic activity;chaperone binding;DNA binding;DNA replication origin binding;double-stranded RNA binding;enzyme binding;hydrolase activity;hydrolase activity, acting on acid anhydrides;hydrolase activity, acting on acid anhydrides, in phosphorus-containing anhydrides;lipopolysaccharide binding;nucleic a…	Cpn60_TCP1	42	42	42	72.1	72.1	72.1	61.054	0	323.31	2579300000	629	27.5727	26.7137	26.8824	28.377	27.2529	26.4317	27.2632	26.9597	0.409579	0.427718
10 kDa heat shock protein, mitochondrial	HSPE1	P61604;B8ZZL8;B8ZZ54;S4R3N1	P61604;B8ZZL8	adenyl nucleotide binding;adenyl ribonucleotide binding;ATP binding;binding;chaperone binding;nucleotide binding;protein binding;purine nucleotide binding;purine ribonucleoside triphosphate binding;purine ribonucleotide binding;ribonucleotide binding;unfolded protein binding	Cpn10;Mob1_phocein	8	8	8	76.5	76.5	76.5	10.932	0	11	224490000	36	24.0478	23.0533	23.193	25.6316	23.458	22.2859	23.9854	23.309	0.72184	0.473226
Heat shock protein 105 kDa	HSPH1	Q92598-2;Q92598;Q92598-3;Q92598-4;A0A0A0MSM0;R4GN69	Q92598-2;Q92598;Q92598-3;Q92598-4;A0A0A0MSM0	adenyl nucleotide binding;adenyl ribonucleotide binding;ATP binding;binding;nucleotide binding;purine nucleotide binding;purine ribonucleoside triphosphate binding;purine ribonucleotide binding;ribonucleotide binding	HSP70	12	11	11	21	19.3	19.3	92.115	0	39.267	128320000	51	23.1702	22.9924	22.7233	23.3606	22.6858	NaN	22.5115	22.5962	0.463809	1.41894
Isoleucine--tRNA ligase, cytoplasmic	IARS	P41252;J3KR24;A0A0A0MSX9;Q5TCD1	P41252;J3KR24;A0A0A0MSX9	adenyl nucleotide binding;adenyl ribonucleotide binding;aminoacyl-tRNA editing activity;aminoacyl-tRNA ligase activity;ATP binding;binding;carboxylic ester hydrolase activity;catalytic activity;enzyme binding;GTPase binding;hydrolase activity;hydrolase activity, acting on ester bonds;isoleucine-tRNA ligase activity;ligase activity;ligase activity, forming aminoacyl-tRNA and related compounds;liga…	Anticodon_1;tRNA-synt_1	5	5	5	7.1	7.1	7.1	144.5	0	42.71	90803000	69	22.4839	22.1639	21.9106	22.4688	22.4492	22.0091	22.3854	22.8723	-0.172203	0.32743
Tyrosine-protein kinase receptor;Insulin-like growth factor 1 receptor;Insulin-like growth factor 1 receptor alpha chain;Insulin-like growth factor 1 receptor beta chain	IGF1R	C9J5X1;P08069;H0YNR0;H3BSZ8;H0YMJ5	C9J5X1;P08069	adenyl nucleotide binding;adenyl ribonucleotide binding;ATP binding;binding;catalytic activity;enzyme binding;growth factor binding;hormone binding;identical protein binding;insulin binding;insulin receptor binding;insulin receptor substrate binding;insulin-like growth factor binding;insulin-like growth factor I binding;insulin-like growth factor-activated receptor activity;kinase activity;kinase…	fn3;Furin-like;Pkinase_Tyr;Recep_L_domain	42	38	37	37.6	35.4	34	154.79	0	175.88	2025200000	356	27.0011	27.1972	27.1555	26.6811	27.0599	27.1255	26.9472	27.0553	-0.0382457	0.115815
MICOS complex subunit MIC60	IMMT	Q16891-2;B9A067;Q16891-4;Q16891;Q16891-3;C9J406;H7C463;A0A087WYS0;D6RAW4	Q16891-2;B9A067;Q16891-4;Q16891;Q16891-3;C9J406;H7C463		Mitofilin	48	48	48	67.9	67.9	67.9	82.624	0	225.26	3263100000	623	27.3723	27.6557	27.5559	27.2316	27.7176	27.4039	27.7262	27.6246	-0.164229	0.652886
Inosine-5-monophosphate dehydrogenase 2	IMPDH2	P12268;H0Y4R1;E7ETK5;C9K0R9;C9J381;P20839-2;P20839-4;P20839;P20839-3;P20839-7;P20839-5;P20839-6	P12268;H0Y4R1	binding;catalytic activity;cation binding;DNA binding;IMP dehydrogenase activity;ion binding;metal ion binding;nucleic acid binding;nucleotide binding;oxidoreductase activity;oxidoreductase activity, acting on CH-OH group of donors;oxidoreductase activity, acting on the CH-OH group of donors, NAD or NADP as acceptor;RNA binding	CBS;IMPDH	13	13	13	50.2	50.2	50.2	55.804	0	45.239	220940000	43	23.5573	22.9444	23.2856	24.8094	23.8692	23.5786	23.4748	23.4753	0.0496778	0.0413992
Insulin receptor;Insulin receptor subunit alpha;Insulin receptor subunit beta	INSR	P06213;P06213-2;M0R3E6	P06213;P06213-2	adenyl nucleotide binding;adenyl ribonucleotide binding;ATP binding;binding;catalytic activity;enzyme binding;growth factor binding;GTP binding;guanyl nucleotide binding;guanyl ribonucleotide binding;hormone binding;insulin binding;insulin receptor substrate binding;insulin-activated receptor activity;insulin-like growth factor binding;insulin-like growth factor I binding;insulin-like growth fact…	fn3;Furin-like;Pkinase_Tyr;Recep_L_domain	48	48	43	39.4	39.4	36.3	156.33	0	221.09	2697900000	615	27.356	27.6673	27.5004	27.0583	27.4462	27.4434	27.4286	27.5195	-0.0639329	0.192314
Inositol polyphosphate multikinase	IPMK	Q8NFU5	Q8NFU5	adenyl nucleotide binding;adenyl ribonucleotide binding;ATP binding;binding;catalytic activity;inositol or phosphatidylinositol kinase activity;inositol tetrakisphosphate 3-kinase activity;inositol tetrakisphosphate kinase activity;inositol trisphosphate 3-kinase activity;inositol trisphosphate 6-kinase activity;inositol trisphosphate kinase activity;kinase activity;nucleotide binding;phosphotran…	IPK	4	4	4	19	19	19	47.221	0	8.5553	61964000	20	NaN	22.0704	22.1726	NaN	22.4838	NaN	NaN	22.8436	-0.542177	0.994581
Importin-5	IPO5	O00410;H0Y8C6;O00410-2;O00410-3;C9JZD8;E7EQT5;E7ETV3	O00410;H0Y8C6;O00410-2;O00410-3	binding;enzyme binding;enzyme inhibitor activity;enzyme regulator activity;GTPase binding;GTPase inhibitor activity;GTPase regulator activity;nucleoside-triphosphatase regulator activity;protein binding;protein transporter activity;Ran GTPase binding;Ras GTPase binding;small GTPase binding;substrate-specific transporter activity;transporter activity	HEAT;IBN_N	5	5	5	7.8	7.8	7.8	123.63	0	28.248	66158000	36	21.9685	21.9634	20.8624	22.0623	21.8656	22.0235	22.6011	NaN	-0.449259	0.528209
Importin-9	IPO9	Q96P70	Q96P70	binding;histone binding;protein binding;protein transporter activity;substrate-specific transporter activity;transporter activity	IBN_N	2	2	2	3.7	3.7	3.7	115.96	0	20.027	57393000	51	21.5371	21.6875	21.7242	21.826	NaN	22.0385	21.129	21.8514	0.0207117	0.0290635
Ras GTPase-activating-like protein IQGAP1	IQGAP1	P46940;H0YLE8	P46940;H0YLE8	binding;calcium ion binding;calmodulin binding;cation binding;enzyme activator activity;enzyme binding;enzyme inhibitor activity;enzyme regulator activity;GTPase activator activity;GTPase inhibitor activity;GTPase regulator activity;ion binding;kinase activator activity;kinase binding;kinase regulator activity;lipid binding;metal ion binding;nucleoside-triphosphatase regulator activity;phosphatas…	CH;IQ;RasGAP;RasGAP_C	5	5	5	6.2	6.2	6.2	189.25	0	3.3539	20082000	7	NaN	20.794	NaN	21.9534	NaN	NaN	NaN	NaN	NaN	0
Interleukin-1 receptor-associated kinase 4	IRAK4	Q9NWZ3;Q9NWZ3-2;F8VW24;F8VVZ1;F8VR40	Q9NWZ3;Q9NWZ3-2	adenyl nucleotide binding;adenyl ribonucleotide binding;ATP binding;binding;catalytic activity;cation binding;ion binding;kinase activity;magnesium ion binding;metal ion binding;nucleotide binding;phosphotransferase activity, alcohol group as acceptor;protein kinase activity;protein serine/threonine kinase activity;purine nucleotide binding;purine ribonucleoside triphosphate binding;purine ribonu…	Pkinase	26	26	26	52.2	52.2	52.2	51.529	0	108.18	1586300000	264	26.7229	26.8599	26.9909	26.3558	26.8845	26.5878	26.8471	26.6007	0.0023303	0.004931
Inosine triphosphate pyrophosphatase	ITPA	Q9BY32;Q9BY32-3;Q9BY32-2	Q9BY32;Q9BY32-3;Q9BY32-2	binding;catalytic activity;cation binding;dITP diphosphatase activity;hydrolase activity;hydrolase activity, acting on acid anhydrides;hydrolase activity, acting on acid anhydrides, in phosphorus-containing anhydrides;ion binding;metal ion binding;nucleoside-triphosphate diphosphatase activity;nucleotide binding;pyrophosphatase activity	Ham1p_like	4	4	4	30.4	30.4	30.4	21.445	0	4.5895	38423000	13	21.8289	21.4265	NaN	22.141	21.7444	NaN	21.8329	21.5776	0.0805257	0.134999
Tyrosine-protein kinase JAK1	JAK1	P23458	P23458	adenyl nucleotide binding;adenyl ribonucleotide binding;ATP binding;binding;catalytic activity;cytokine receptor binding;enzyme binding;growth hormone receptor binding;hormone receptor binding;kinase activity;non-membrane spanning protein tyrosine kinase activity;nucleotide binding;phosphatase binding;phosphotransferase activity, alcohol group as acceptor;protein binding;protein kinase activity;p…	Pkinase_Tyr	29	29	29	33.3	33.3	33.3	133.28	0	60.328	548800000	177	25.1947	25.5499	25.2659	24.8232	25.0873	25.0445	24.9157	25.0888	0.174376	0.517536
KH domain-containing, RNA-binding, signal transduction-associated protein 1	KHDRBS1	Q07666-3;Q07666-2;Q07666	Q07666-3;Q07666-2;Q07666	binding;binding, bridging;DNA binding;identical protein binding;mRNA binding;nucleic acid binding;poly(A) RNA binding;poly(U) RNA binding;poly-purine tract binding;poly-pyrimidine tract binding;protein binding;protein binding, bridging;RNA binding;SH3/SH2 adaptor activity;signaling adaptor activity;single-stranded RNA binding	KH_1	2	2	2	8.4	8.4	8.4	44.027	0	13.335	69698000	18	22.2442	22.888	21.9586	22.5733	21.9643	21.5655	21.8311	21.7717	0.632885	1.56711
Far upstream element-binding protein 2	KHSRP	A0A087WTP3;Q92945;M0R0I5;M0QXW7;M0QYH3;M0QYG1;M0R0C6;M0R3J3;M0R251;M0R263	A0A087WTP3;Q92945	binding;DNA binding;mRNA binding;nucleic acid binding;RNA binding	DUF1897;KH_1	15	15	13	22.6	22.6	18.8	73.027	0	30.731	231970000	114	23.9563	23.744	23.8249	24.605	23.615	23.4262	23.5334	23.7992	0.439087	1.08296
Importin subunit beta-1	KPNB1	Q14974;J3QR48;Q14974-2;J3KTM9;J3QRG4	Q14974;J3QR48	binding;cation binding;enzyme binding;ion binding;metal ion binding;nuclear localization sequence binding;peptide binding;protein binding;protein domain specific binding;protein transporter activity;signal sequence binding;substrate-specific transporter activity;transition metal ion binding;transporter activity;zinc ion binding	Arm;IBN_N	9	9	9	14.2	14.2	14.2	97.169	0	17.509	162480000	81	23.4057	22.6845	22.7644	24.1279	23.2831	22.2955	23.011	23.1066	0.321605	0.345296
Keratin, type I cytoskeletal 18	KRT18	P05783;F8VZY9;CON__H-INV:HIT000015463	P05783;F8VZY9	binding;protein binding;scaffold protein binding;structural molecule activity	Filament	32	30	21	78.4	76.3	65.6	48.057	0	323.31	2774900000	500	26.8359	26.9419	26.8841	27.2717	26.8356	28.0164	27.2617	27.3525	-0.383107	0.708
Keratin, type I cytoskeletal 19	KRT19	P08727;C9JM50	P08727;C9JM50	structural constituent of cytoskeleton;structural constituent of muscle;structural molecule activity	Filament	37	31	1	88.8	85.8	7.5	44.105	0	214.28	1882800000	361	26.3069	26.5499	26.5881	26.8064	26.1916	27.5048	26.6143	26.7142	-0.193407	0.273265
Serine/threonine-protein kinase LATS1	LATS1	O95835;O95835-2;Q6PJG3	O95835;O95835-2	adenyl nucleotide binding;adenyl ribonucleotide binding;ATP binding;binding;catalytic activity;cation binding;enzyme binding;ion binding;kinase activity;kinase binding;magnesium ion binding;metal ion binding;nucleotide binding;phosphotransferase activity, alcohol group as acceptor;protein binding;protein kinase activity;protein kinase binding;protein serine/threonine kinase activity;purine nucleo…	Pkinase;UBA	21	21	18	26.3	26.3	22.3	126.87	0	70.564	652910000	170	25.4911	25.6471	25.5683	25.2529	25.5661	25.4666	25.478	25.5303	-0.0203753	0.0835011
Lamin-B receptor	LBR	Q14739;C9JXK0;C9JES9	Q14739;C9JXK0	binding;catalytic activity;chromo shadow domain binding;DNA binding;lamin binding;nucleic acid binding;oxidoreductase activity;oxidoreductase activity, acting on the CH-CH group of donors;oxidoreductase activity, acting on the CH-CH group of donors, NAD or NADP as acceptor;protein binding;protein domain specific binding	ERG4_ERG24;LBR_tudor	15	15	15	23.1	23.1	23.1	70.702	0	49.507	1122100000	106	25.6493	26.1902	25.8954	25.6177	26.1736	25.9768	26.291	26.1789	-0.316909	1.11956
L-lactate dehydrogenase A chain	LDHA	P00338;P00338-3;P00338-4;P00338-5;P00338-2;F5GXY2;F5GYU2;F5GXH2;F5H5J4;F5H6W8;F5GZQ4;F5H8H6;F5GXC7;F5GWW2;F5GXU1;A0A087WUM2;Q6ZMR3	P00338;P00338-3;P00338-4;P00338-5;P00338-2;F5GXY2;F5GYU2	catalytic activity;lactate dehydrogenase activity;L-lactate dehydrogenase activity;oxidoreductase activity;oxidoreductase activity, acting on CH-OH group of donors;oxidoreductase activity, acting on the CH-OH group of donors, NAD or NADP as acceptor	Ldh_1_C;Ldh_1_N	24	24	24	71.1	71.1	71.1	36.688	0	99.264	630810000	209	25.6985	24.8779	24.8255	26.4923	25.1207	24.2295	25.1822	24.5698	0.697992	0.753965
L-lactate dehydrogenase B chain;L-lactate dehydrogenase	LDHB	P07195;A8MW50;C9J7H8;F5H793	P07195;A8MW50;C9J7H8	binding;catalytic activity;coenzyme binding;cofactor binding;lactate dehydrogenase activity;L-lactate dehydrogenase activity;NAD binding;nucleotide binding;oxidoreductase activity;oxidoreductase activity, acting on CH-OH group of donors;oxidoreductase activity, acting on the CH-OH group of donors, NAD or NADP as acceptor	Ldh_1_C;Ldh_1_N	20	20	20	70.4	70.4	70.4	36.638	0	79.824	466420000	128	25.1985	24.1813	24.4339	26.1822	24.3507	23.8101	24.9125	24.1403	0.695556	0.660999
Galectin-1	LGALS1	P09382;F8WEI7	P09382	binding;carbohydrate binding;disaccharide binding;galactoside binding;lactose binding;molecular transducer activity;monosaccharide binding;signal transducer activity;sugar binding	Gal-bind_lectin	8	8	8	68.9	68.9	68.9	14.716	0	47.494	301640000	65	24.4134	24.1402	24.1878	25.0991	24.0983	23.8279	23.9923	24.0603	0.465425	1.05315
Galectin-3-binding protein	LGALS3BP	Q08380;K7ERZ6;K7EJD3;K7ESM3;K7EKQ5;K7EP36	Q08380	cargo receptor activity;receptor activity;scavenger receptor activity	BACK;SRCR	4	4	4	16.9	16.9	16.9	65.33	0	45.638	66598000	54	21.7741	22.3136	22.14	NaN	22.0429	NaN	22.2239	22.153	-0.064038	0.141684
LIM domain kinase 1	LIMK1	P53667-2;P53667;E9PC47;P53667-4;P53667-3;B5MC51;P53671-2;P53671;P53671-3	P53667-2;P53667;E9PC47;P53667-4	adenyl nucleotide binding;adenyl ribonucleotide binding;ATP binding;binding;catalytic activity;cation binding;heat shock protein binding;ion binding;kinase activity;metal ion binding;nucleotide binding;phosphotransferase activity, alcohol group as acceptor;protein binding;protein kinase activity;protein serine/threonine kinase activity;purine nucleotide binding;purine ribonucleoside triphosphate …	LIM;PDZ;Pkinase;Pkinase_Tyr;PP1_inhibitor	19	19	19	39.3	39.3	39.3	70.792	0	58.132	660150000	133	25.6638	25.5313	25.6404	24.8708	25.2437	25.5833	25.5385	25.28	0.015202	0.0251319
Lipase maturation factor 2	LMF2	Q9BU23-3;Q9BU23-2;Q9BU23	Q9BU23-3;Q9BU23-2;Q9BU23		LMF1	2	2	2	4	4	4	67.155	0	30.75	51659000	15	21.4102	NaN	22.1142	NaN	21.7555	21.8821	22.0086	22.2549	-0.213082	0.326385
Prelamin-A/C;Lamin-A/C	LMNA	P02545-5;P02545-4;P02545-3;P02545;Q5TCI8;P02545-2;P02545-6;A0A0C4DGC5;Q3BDU5;H0YAB0	P02545-5;P02545-4;P02545-3;P02545;Q5TCI8;P02545-2;P02545-6;A0A0C4DGC5	structural molecule activity	Filament;LTD	9	9	9	26.5	26.5	26.5	62.852	0	18.947	80026000	46	NaN	22.1403	22.1255	22.4244	NaN	23.0388	22.0962	22.4577	-0.30084	0.443685
Lamin-B1	LMNB1	P20700;E9PBF6;A0A0D9SFE5	P20700;E9PBF6;A0A0D9SFE5	structural molecule activity	Filament;LTD	7	7	7	17.9	17.9	17.9	66.408	0	34.903	51829000	23	21.5723	NaN	21.7967	22.4471	21.3644	21.9583	NaN	NaN	0.277348	0.265804
Leucine-rich PPR motif-containing protein, mitochondrial	LRPPRC	P42704;C9JCA9;B8ZZ38;A0A0C4DG06;H7C3W8	P42704;C9JCA9;B8ZZ38;A0A0C4DG06	beta-tubulin binding;binding;cytoskeletal protein binding;DNA binding;enzyme binding;microtubule binding;nucleic acid binding;protein binding;RNA binding;single-stranded DNA binding;structure-specific DNA binding;tubulin binding;ubiquitin protein ligase binding	PPR;PPR_1;PPR_3	6	6	6	7.2	7.2	7.2	157.9	0	12.689	42888000	21	NaN	21.7554	NaN	22.9976	NaN	NaN	22.4881	22.2743	-0.00472164	0.00230689
Leucine-rich repeat-containing protein 59	LRRC59	Q96AG4	Q96AG4		LRR_1;LRR_8	5	5	5	25.4	25.4	25.4	34.93	0	10.701	39114000	11	NaN	NaN	21.3886	22.5323	NaN	NaN	NaN	NaN	NaN	0
Putative RNA-binding protein Luc7-like 1	LUC7L	Q9NQ29-2;Q9NQ29;B8ZZ10;A8MYV2;Q9NQ29-3;B8ZZ09;F8WBC1;F2Z322	Q9NQ29-2;Q9NQ29;B8ZZ10;A8MYV2;Q9NQ29-3	binding;identical protein binding;mRNA binding;nucleic acid binding;protein binding;RNA binding	LUC7	5	3	3	16.9	13.8	13.8	38.405	0	5.1758	22664000	14	NaN	21.8014	NaN	21.3815	NaN	NaN	21.0743	NaN	0.517148	0
Putative RNA-binding protein Luc7-like 2	LUC7L2;C7orf55-LUC7L2	Q9Y383;A0A0A6YYC3;Q96HJ9-2;A0A0A6YYJ8;Q9Y383-3;Q9Y383-2;V9GZ75;F8WEU3	Q9Y383;A0A0A6YYC3;Q96HJ9-2;A0A0A6YYJ8;Q9Y383-3;Q9Y383-2	binding;enzyme binding;mRNA binding;nucleic acid binding;protein binding;RNA binding	LUC7	22	22	20	43.9	43.9	40.8	46.513	0	73.477	456420000	158	24.3504	25.4696	24.8123	24.6455	24.4074	24.8071	24.7873	24.9256	0.087604	0.125172
Luc7-like protein 3	LUC7L3	J3KPP4;O95232;D6RDI2;E7EN55;C9JL41;O95232-2	J3KPP4;O95232;D6RDI2;E7EN55;C9JL41;O95232-2	binding;DNA binding;mRNA binding;nucleic acid binding;RNA binding	LUC7	4	4	4	15.7	15.7	15.7	58.22	0	10.833	84974000	28	22.5593	22.8258	22.5949	21.8121	22.6946	22.6748	22.1298	22.6034	-0.0776372	0.111788
Tyrosine-protein kinase Lyn	LYN	P07948-2;P07948;E5RJ37	P07948-2;P07948	adenyl nucleotide binding;adenyl ribonucleotide binding;ATP binding;binding;catalytic activity;enzyme binding;glycolipid binding;glycosphingolipid binding;ion channel binding;kinase activity;lipid binding;molecular transducer activity;non-membrane spanning protein tyrosine kinase activity;nucleotide binding;phosphotransferase activity, alcohol group as acceptor;protein binding;protein kinase acti…	Pkinase_Tyr;SH2;SH3_1	47	45	43	80.2	77.2	75.2	56.033	0	257.11	5664600000	727	28.5739	28.6685	28.636	28.2305	28.5214	28.5844	28.2797	28.5773	0.0365252	0.109117
Acyl-protein thioesterase 1	LYPLA1	O75608-2;O75608;A0A087X1K9;B4DP64;E5RGR0;E5RJ48	O75608-2;O75608;A0A087X1K9;B4DP64;E5RGR0	carboxylic ester hydrolase activity;catalytic activity;hydrolase activity;hydrolase activity, acting on ester bonds;lipase activity;lysophospholipase activity;palmitoyl-(protein) hydrolase activity;phospholipase activity;thiolester hydrolase activity	Abhydrolase_2	3	3	3	31.3	31.3	31.3	22.875	0	12.946	33653000	6	NaN	NaN	20.6206	21.3942	NaN	NaN	NaN	NaN	NaN	0
Acyl-protein thioesterase 2	LYPLA2	Q5QPQ0;O95372	Q5QPQ0;O95372	catalytic activity;hydrolase activity	Abhydrolase_2	2	2	2	26.8	26.8	26.8	17.659	0	4.5804	49950000	17	NaN	22.0413	22.3037	22.2488	22.0548	NaN	NaN	NaN	0.143086	0
Dual specificity mitogen-activated protein kinase kinase 1	MAP2K1	Q02750;Q02750-2;H3BRW9	Q02750;Q02750-2	adenyl nucleotide binding;adenyl ribonucleotide binding;ATP binding;binding;catalytic activity;enzyme activator activity;enzyme regulator activity;hydrolase activity;hydrolase activity, acting on ester bonds;kinase activator activity;kinase activity;kinase regulator activity;MAP kinase kinase activity;molecular transducer activity;nucleotide binding;phosphatase activity;phosphoprotein phosphatase…	Pkinase	22	22	16	62.3	62.3	47.3	43.439	0	212.28	2531100000	296	27.158	27.4335	27.6773	26.9768	27.4455	27.1572	27.49	27.5036	-0.087678	0.198817
Dual specificity mitogen-activated protein kinase kinase 2	MAP2K2	P36507;G5E9C7;M0R1B6	P36507;G5E9C7	adenyl nucleotide binding;adenyl ribonucleotide binding;ATP binding;binding;catalytic activity;enzyme activator activity;enzyme regulator activity;kinase activator activity;kinase activity;kinase regulator activity;MAP kinase kinase activity;nucleotide binding;PDZ domain binding;phosphotransferase activity, alcohol group as acceptor;protein binding;protein domain specific binding;protein kinase a…	Pkinase	16	10	10	54.8	37	37	44.424	0	114.1	526870000	157	24.957	25.2007	25.0826	24.8006	24.9267	24.8709	24.9954	25.2295	0.00458527	0.0132813
Dual specificity mitogen-activated protein kinase kinase 5	MAP2K5	Q13163-4;Q13163;Q13163-2;Q13163-3;H7BZL1;A0A087WWX7;A6NK28	Q13163-4;Q13163;Q13163-2;Q13163-3;H7BZL1	adenyl nucleotide binding;adenyl ribonucleotide binding;ATP binding;binding;catalytic activity;cation binding;ion binding;kinase activity;MAP kinase kinase activity;metal ion binding;nucleotide binding;phosphotransferase activity, alcohol group as acceptor;protein kinase activity;protein serine/threonine kinase activity;protein serine/threonine/tyrosine kinase activity;protein tyrosine kinase act…	PB1;Pkinase	9	9	9	32.5	32.5	32.5	46.13	0	90.125	374810000	146	24.2274	24.4956	24.6848	24.2758	24.5466	24.3205	24.513	24.5135	-0.0525017	0.173524
Dual specificity mitogen-activated protein kinase kinase 6	MAP2K6	P52564;P52564-2;K7EIW3;A0A0A0MRF7;K7ELM6	P52564;P52564-2	adenyl nucleotide binding;adenyl ribonucleotide binding;ATP binding;binding;catalytic activity;enzyme binding;kinase activity;kinase binding;MAP kinase kinase activity;nucleotide binding;phosphotransferase activity, alcohol group as acceptor;protein binding;protein kinase activity;protein kinase binding;protein serine/threonine kinase activity;protein serine/threonine/tyrosine kinase activity;pro…	Pkinase	23	23	20	75.4	75.4	65.6	37.492	0	87.267	743180000	197	25.569	25.7373	25.6245	25.1404	25.533	25.3959	25.489	25.6638	-0.00260401	0.00614122
Mitogen-activated protein kinase kinase kinase 1	MAP3K1	Q13233	Q13233	adenyl nucleotide binding;adenyl ribonucleotide binding;ATP binding;binding;catalytic activity;cation binding;enzyme binding;ion binding;JUN kinase kinase activity;kinase activity;kinase binding;MAP kinase kinase activity;MAP kinase kinase kinase activity;metal ion binding;molecular transducer activity;nucleotide binding;phosphotransferase activity, alcohol group as acceptor;protein binding;prote…	Pkinase	18	18	18	21.8	21.8	21.8	164.47	0	79.497	403690000	108	24.523	24.3669	24.5887	24.1373	24.5	24.6068	24.3831	24.3828	-0.0641785	0.226672
Mitogen-activated protein kinase kinase kinase 11	MAP3K11	Q16584;Q16584-2;E9PID4;E9PLB1;E9PRQ2;H0YCF5;M0R0A7;G3V4P9;A0A087WW79;Q02779	Q16584;Q16584-2	adenyl nucleotide binding;adenyl ribonucleotide binding;ATP binding;bHLH transcription factor binding;binding;catalytic activity;enzyme binding;identical protein binding;JUN kinase kinase kinase activity;kinase activity;kinase binding;MAP kinase kinase kinase activity;mitogen-activated protein kinase kinase kinase binding;molecular transducer activity;nucleotide binding;phosphotransferase activit…	Pkinase_Tyr;SH3_9	16	16	15	35.5	35.5	34.6	92.687	0	49.111	244380000	100	24.0947	24.2803	23.9471	23.4804	24.0804	24.1085	23.6587	24.1908	-0.0590243	0.10427
Mitogen-activated protein kinase kinase kinase 2	MAP3K2	Q9Y2U5;F8W6K3;J3QS19	Q9Y2U5	adenyl nucleotide binding;adenyl ribonucleotide binding;ATP binding;binding;catalytic activity;cation binding;enzyme binding;ion binding;kinase activity;kinase binding;MAP kinase kinase activity;MAP kinase kinase kinase activity;metal ion binding;molecular transducer activity;nucleotide binding;phosphotransferase activity, alcohol group as acceptor;protein binding;protein kinase activity;protein …	PB1;Pkinase	31	31	26	61.1	61.1	57.5	69.74	0	131.92	2355200000	474	27.2317	27.1525	27.2527	26.9641	27.1513	27.0704	26.9539	27.137	0.072072	0.397625
Mitogen-activated protein kinase kinase kinase 3	MAP3K3	J3KRN4;J3QRB6;Q99759;Q99759-2;J3KTC4	J3KRN4;J3QRB6;Q99759;Q99759-2	adenyl nucleotide binding;adenyl ribonucleotide binding;ATP binding;binding;catalytic activity;cation binding;ion binding;kinase activity;MAP kinase kinase activity;MAP kinase kinase kinase activity;metal ion binding;molecular transducer activity;nucleotide binding;phosphotransferase activity, alcohol group as acceptor;protein kinase activity;protein serine/threonine kinase activity;protein serin…	PB1;Pkinase	20	15	15	48.1	41.8	41.8	70.467	0	67.727	396290000	128	24.7398	24.6848	24.619	24.3333	24.5066	24.4404	24.4553	24.6319	0.085649	0.370503
Mitogen-activated protein kinase kinase kinase kinase;Mitogen-activated protein kinase kinase kinase kinase 2	MAP4K2	A0A0A6YYA7;Q12851-2;Q12851;C9JCU6;H7C208;F2Z2B3;F8WCP4	A0A0A6YYA7;Q12851-2;Q12851	adenyl nucleotide binding;adenyl ribonucleotide binding;ATP binding;binding;catalytic activity;enzyme binding;kinase activity;kinase binding;MAP kinase kinase kinase kinase activity;mitogen-activated protein kinase kinase kinase binding;molecular transducer activity;nucleotide binding;phosphotransferase activity, alcohol group as acceptor;protein binding;protein kinase activity;protein kinase bin…	CNH;Pkinase	26	24	24	55.4	53.2	53.2	90.808	0	82.9	759340000	245	25.4149	25.6357	25.7079	25.2919	25.4937	25.3815	25.2557	25.3292	0.147572	0.651407
Mitogen-activated protein kinase kinase kinase kinase 3;Mitogen-activated protein kinase kinase kinase kinase	MAP4K3	Q8IVH8;Q8IVH8-3;Q8IVH8-2;F5H5A3;V9GY95;F8WAZ1;F8WBC3;H7C1A4	Q8IVH8;Q8IVH8-3;Q8IVH8-2;F5H5A3	adenyl nucleotide binding;adenyl ribonucleotide binding;ATP binding;binding;catalytic activity;kinase activity;MAP kinase kinase kinase kinase activity;molecular transducer activity;nucleotide binding;phosphotransferase activity, alcohol group as acceptor;protein kinase activity;protein serine/threonine kinase activity;purine nucleotide binding;purine ribonucleoside triphosphate binding;purine ri…	CNH;Pkinase	29	29	27	44.3	44.3	42.3	101.31	0	209.42	1215600000	310	26.7577	26.5269	26.8154	25.8036	26.6659	26.2564	26.3401	26.384	0.0643272	0.0943328
Mitogen-activated protein kinase kinase kinase kinase 4	MAP4K4	E7ENQ1;G3XAA2;H7C360;G5E948;E7EN19;E7ESS2;A0A0D9SEY1;O95819-4;O95819-2;O95819;O95819-5;O95819-3;E7EX83;A0A0D9SG62;C9J840;H7C0P6;E7ETN6	E7ENQ1;G3XAA2;H7C360;G5E948;E7EN19;E7ESS2;A0A0D9SEY1;O95819-4;O95819-2;O95819;O95819-5;O95819-3;E7EX83;A0A0D9SG62;C9J840	adenyl nucleotide binding;adenyl ribonucleotide binding;ATP binding;binding;catalytic activity;creatine kinase activity;kinase activity;nucleotide binding;phosphotransferase activity, alcohol group as acceptor;phosphotransferase activity, nitrogenous group as acceptor;protein kinase activity;protein serine/threonine kinase activity;purine nucleotide binding;purine ribonucleoside triphosphate bind…	CNH;Pkinase	20	5	5	17	5.1	5.1	132.16	0	10.735	86913000	38	22.0827	22.3389	22.3947	22.6892	22.4243	22.4598	22.5681	22.3775	-0.0810747	0.253085
Mitogen-activated protein kinase kinase kinase kinase	MAP4K5	A0A0A0MQR1;G3V4T8;G3V3V7;G3V4Q4;G3V5C6	A0A0A0MQR1	adenyl nucleotide binding;adenyl ribonucleotide binding;ATP binding;binding;catalytic activity;kinase activity;nucleotide binding;phosphotransferase activity, alcohol group as acceptor;protein kinase activity;protein serine/threonine kinase activity;purine nucleotide binding;purine ribonucleoside triphosphate binding;purine ribonucleotide binding;ribonucleotide binding;transferase activity;transf…	CNH;Pkinase	36	36	1	58.7	58.7	2.2	95.023	0	104.68	1319200000	361	26.3284	26.5427	26.555	25.8588	26.4274	26.303	26.3838	26.364	-0.0483556	0.108471
Mitogen-activated protein kinase 1	MAPK1	P28482;P28482-2	P28482;P28482-2	adenyl nucleotide binding;adenyl ribonucleotide binding;ATP binding;binding;catalytic activity;DNA binding;enzyme binding;kinase activity;MAP kinase activity;molecular transducer activity;nucleic acid binding;nucleotide binding;phosphatase binding;phosphotransferase activity, alcohol group as acceptor;protein binding;protein kinase activity;protein serine/threonine kinase activity;purine nucleoti…	Pkinase	58	58	47	99.7	99.7	88.3	41.389	0	323.31	77746000000	2773	32.2105	32.1723	32.0844	31.6051	31.916	32.1681	31.8476	32.1298	0.00268126	0.00557937
Mitogen-activated protein kinase 3;Mitogen-activated protein kinase	MAPK3	P27361;E9PQW4;P27361-2;P27361-3;E9PJF0;E9PBK7;B3KR49;H0YEX6;E9PRH7;H0YDH9;K7ELV1;K7EN18;P31152	P27361;E9PQW4;P27361-2;P27361-3;E9PJF0;E9PBK7;B3KR49	adenyl nucleotide binding;adenyl ribonucleotide binding;ATP binding;binding;catalytic activity;enzyme binding;identical protein binding;kinase activity;kinase binding;MAP kinase activity;molecular transducer activity;nucleotide binding;phosphatase binding;phosphotransferase activity, alcohol group as acceptor;protein binding;protein dimerization activity;protein homodimerization activity;protein …	Pkinase	43	32	32	88.4	74.1	74.1	43.135	0	323.31	9631000000	812	29.2416	29.2622	29.1776	28.9814	29.1644	29.118	29.0075	29.253	0.0299854	0.138538
Mitogen-activated protein kinase 6	MAPK6	Q16659	Q16659	adenyl nucleotide binding;adenyl ribonucleotide binding;ATP binding;binding;catalytic activity;kinase activity;MAP kinase activity;molecular transducer activity;nucleotide binding;phosphotransferase activity, alcohol group as acceptor;protein kinase activity;protein serine/threonine kinase activity;purine nucleotide binding;purine ribonucleoside triphosphate binding;purine ribonucleotide binding;…	Pkinase	5	3	3	8.2	6.4	6.4	82.68	0	7.5025	34377000	22	20.7168	20.8511	20.8306	20.9269	20.9645	21.068	NaN	21.1383	-0.225591	1.7118
Mitogen-activated protein kinase 8	MAPK8	P45983-3;P45983-4	P45983-3;P45983-4	adenyl nucleotide binding;adenyl ribonucleotide binding;ATP binding;binding;catalytic activity;enzyme binding;enzyme regulator activity;histone deacetylase binding;histone deacetylase regulator activity;JUN kinase activity;kinase activity;MAP kinase activity;molecular transducer activity;nucleotide binding;phosphotransferase activity, alcohol group as acceptor;protein binding;protein kinase activ…	Pkinase	39	30	4	91.1	76	15.9	44.021	0	323.31	8821800000	685	29.2651	29.2223	29.1458	28.9668	29.1855	29.1397	28.9259	29.0995	0.0623693	0.301132
Mitogen-activated protein kinase 9	MAPK9	P45984-2;P45984;P45984-3;P45984-4;J3KNK1;P45984-5;D7R525;E5RJ57;D7R528;D6RBH2	P45984-2;P45984;P45984-3;P45984-4;J3KNK1;P45984-5	adenyl nucleotide binding;adenyl ribonucleotide binding;apoptotic protease activator activity;ATP binding;binding;caspase activator activity;caspase regulator activity;catalytic activity;enzyme activator activity;enzyme regulator activity;JUN kinase activity;kinase activity;MAP kinase activity;molecular transducer activity;nucleotide binding;peptidase activator activity;peptidase regulator activi…	Pkinase	45	45	34	94.2	94.2	74.6	44.05	0	323.31	17873000000	1154	30.2904	30.161	30.3463	29.8188	30.0879	30.1856	30.0405	30.197	0.0263662	0.0762316
MAP kinase-activated protein kinase 5	MAPKAPK5	Q8IW41-2	Q8IW41-2	adenyl nucleotide binding;adenyl ribonucleotide binding;ATP binding;binding;calcium-dependent protein kinase activity;calcium-dependent protein serine/threonine kinase activity;calmodulin binding;calmodulin-dependent protein kinase activity;catalytic activity;enzyme binding;kinase activity;kinase binding;MAP kinase kinase activity;mitogen-activated protein kinase binding;molecular transducer acti…	Pkinase	21	21	2	63.1	63.1	6.4	54.035	0	147.98	1252500000	247	26.0576	26.1194	26.1907	25.9715	26.1388	26.0908	25.7241	26.0688	0.0791664	0.316522
Serine/threonine-protein kinase MARK1	MARK1	B4DIB3;A0A087X0I6;Q9P0L2;Q9P0L2-3;Q9P0L2-2	B4DIB3;A0A087X0I6;Q9P0L2;Q9P0L2-3;Q9P0L2-2	adenyl nucleotide binding;adenyl ribonucleotide binding;ATP binding;binding;catalytic activity;cation binding;ion binding;kinase activity;lipid binding;magnesium ion binding;metal ion binding;nucleotide binding;phosphatidic acid binding;phosphatidylinositol binding;phosphatidylinositol-4,5-bisphosphate binding;phosphatidylserine binding;phospholipid binding;phosphotransferase activity, alcohol gr…	KA1;Pkinase	33	17	17	58.6	39.6	39.6	87.455	0	114.36	561890000	168	25.2534	25.4881	25.3394	24.8899	25.434	25.4022	25.2408	25.4328	-0.134753	0.446442
Serine/threonine-protein kinase MARK2	MARK2	E9PC69;Q7KZI7-16;Q7KZI7-14;Q7KZI7-15;E7ETY4;Q7KZI7-13;F5H4F6;F5H6N2;F5H4J8	E9PC69;Q7KZI7-16;Q7KZI7-14;Q7KZI7-15;E7ETY4;Q7KZI7-13	adenyl nucleotide binding;adenyl ribonucleotide binding;ATP binding;binding;catalytic activity;cation binding;enzyme activator activity;enzyme regulator activity;ion binding;kinase activator activity;kinase activity;kinase regulator activity;lipid binding;magnesium ion binding;metal ion binding;nucleotide binding;phosphotransferase activity, alcohol group as acceptor;protein kinase activator acti…	KA1;Pkinase	59	59	4	73.5	73.5	2.7	86.69	0	323.31	8690400000	849	29.1354	29.2588	29.3435	28.981	29.2155	29.2413	29.0514	29.1918	0.00469971	0.0178095
MAP/microtubule affinity-regulating kinase 3	MARK3	A0A0A0MT23;P27448-3;P27448-4;P27448;A0A0A0MSZ1;J3KNR0;P27448-2;A0A0A0MST9;P27448-8;H0YKP9;H0YNV4;A2SY06;H0YKJ3;K7EK17;K7EKG8	A0A0A0MT23;P27448-3;P27448-4;P27448;A0A0A0MSZ1;J3KNR0;P27448-2;A0A0A0MST9;P27448-8	adenyl nucleotide binding;adenyl ribonucleotide binding;ATP binding;binding;catalytic activity;kinase activity;nucleotide binding;phosphotransferase activity, alcohol group as acceptor;protein kinase activity;protein serine/threonine kinase activity;purine nucleotide binding;purine ribonucleoside triphosphate binding;purine ribonucleotide binding;ribonucleotide binding;transferase activity;transf…	KA1;Pkinase	37	26	4	56.6	41.4	5.4	84.428	0	177.84	1057000000	255	25.9736	26.3751	26.3331	25.9866	26.0971	26.2966	26.0191	26.0408	0.0537186	0.165328
Methionine--tRNA ligase, cytoplasmic	MARS	P56192;H0YIP0;H0YHV5;P56192-2;H0YI94	P56192;H0YIP0;H0YHV5;P56192-2	adenyl nucleotide binding;adenyl ribonucleotide binding;aminoacyl-tRNA ligase activity;ATP binding;binding;catalytic activity;ligase activity;ligase activity, forming aminoacyl-tRNA and related compounds;ligase activity, forming carbon-oxygen bonds;methionine-tRNA ligase activity;nucleic acid binding;nucleotide binding;purine nucleotide binding;purine ribonucleoside triphosphate binding;purine ri…	tRNA-synt_1g;WHEP-TRS	4	4	4	10.3	10.3	10.3	101.11	0	21.64	39931000	34	21.8252	21.679	21.3173	21.6899	NaN	21.4519	21.3618	21.3052	0.25491	0.941251
S-adenosylmethionine synthase isoform type-2	MAT2A	P31153;P31153-2	P31153;P31153-2	adenyl nucleotide binding;adenyl ribonucleotide binding;ATP binding;binding;catalytic activity;cation binding;ion binding;metal ion binding;methionine adenosyltransferase activity;nucleotide binding;purine nucleotide binding;purine ribonucleoside triphosphate binding;purine ribonucleotide binding;ribonucleotide binding;transferase activity;transferase activity, transferring alkyl or aryl (other t…	S-AdoMet_synt_C;S-AdoMet_synt_M;S-AdoMet_synt_N	3	3	3	10.1	10.1	10.1	43.66	0	4.4366	18903000	14	20.9305	20.7945	NaN	21.6242	NaN	NaN	NaN	20.4819	0.634501	0
Lysophospholipid acyltransferase 7	MBOAT7	Q96N66-2;Q96N66;Q96N66-3	Q96N66-2;Q96N66;Q96N66-3	catalytic activity;lysophospholipid acyltransferase activity;transferase activity;transferase activity, transferring acyl groups;transferase activity, transferring acyl groups other than amino-acyl groups	MBOAT	6	6	6	12	12	12	44.732	0	60.973	587180000	81	24.5118	25.1232	25.3795	24.873	25.176	25.0252	25.2107	25.1608	-0.171308	0.397333
Methylcrotonoyl-CoA carboxylase beta chain, mitochondrial	MCCC2	Q9HCC0;Q9HCC0-2;D6RD67;D6RDF7;D6R9R1;A0A0G2JM88	Q9HCC0;Q9HCC0-2	adenyl nucleotide binding;adenyl ribonucleotide binding;ATP binding;binding;catalytic activity;CoA carboxylase activity;ligase activity;ligase activity, forming carbon-carbon bonds;methylcrotonoyl-CoA carboxylase activity;nucleotide binding;purine nucleotide binding;purine ribonucleoside triphosphate binding;purine ribonucleotide binding;ribonucleotide binding	Carboxyl_trans	7	7	7	27	27	27	61.332	0	10.56	55920000	18	22.0885	21.9509	21.9862	22.0209	21.9832	21.3204	21.82	21.7586	0.291075	1.04239
DNA replication licensing factor MCM3	MCM3	P25205;J3KQ69;P25205-2;Q7Z6P5	P25205;J3KQ69;P25205-2	adenyl nucleotide binding;adenyl ribonucleotide binding;ATP binding;binding;catalytic activity;DNA binding;DNA helicase activity;helicase activity;hydrolase activity;hydrolase activity, acting on acid anhydrides;hydrolase activity, acting on acid anhydrides, in phosphorus-containing anhydrides;nucleic acid binding;nucleoside-triphosphatase activity;nucleotide binding;purine nucleotide binding;pur…	MCM;MCM_N	9	9	9	20.2	20.2	20.2	90.98	0	19.7	120770000	24	22.9254	22.7229	22.2296	23.3443	22.5377	23.1741	22.5906	22.7278	0.0479903	0.0623785
DNA replication licensing factor MCM7	MCM7	P33993-3;P33993;P33993-2;C9J8M6	P33993-3;P33993;P33993-2	adenyl nucleotide binding;adenyl ribonucleotide binding;ATP binding;binding;catalytic activity;DNA binding;DNA helicase activity;helicase activity;hydrolase activity;hydrolase activity, acting on acid anhydrides;hydrolase activity, acting on acid anhydrides, in phosphorus-containing anhydrides;nucleic acid binding;nucleoside-triphosphatase activity;nucleotide binding;purine nucleotide binding;pur…	MCM;MCM_N	5	5	5	16	16	16	60.643	0	7.275	53081000	32	21.8804	NaN	NaN	22.1163	21.63	21.7924	NaN	21.3222	0.416858	0.897539
Malate dehydrogenase, cytoplasmic	MDH1	B9A041;P40925-2;P40925;P40925-3;B8ZZ51;C9JRL4;C9JF79	B9A041;P40925-2;P40925;P40925-3;B8ZZ51	binding;catalytic activity;coenzyme binding;cofactor binding;diiodophenylpyruvate reductase activity;L-malate dehydrogenase activity;malate dehydrogenase activity;malic enzyme activity;NAD binding;nucleotide binding;oxidoreductase activity;oxidoreductase activity, acting on CH-OH group of donors;oxidoreductase activity, acting on the CH-OH group of donors, NAD or NADP as acceptor	Ldh_1_C;Ldh_1_N	5	5	5	43.8	43.8	43.8	23.038	0	10.112	43369000	19	22.0592	NaN	NaN	23.4099	21.6857	NaN	21.8333	21.5635	1.04042	0.867209
Malate dehydrogenase, mitochondrial;Malate dehydrogenase	MDH2	P40926;P40926-2;G3XAL0	P40926;P40926-2;G3XAL0	catalytic activity;L-malate dehydrogenase activity;malate dehydrogenase (NADP+) activity;malate dehydrogenase activity;oxidoreductase activity;oxidoreductase activity, acting on CH-OH group of donors;oxidoreductase activity, acting on the CH-OH group of donors, NAD or NADP as acceptor	Ldh_1_C;Ldh_1_N	12	12	12	50.3	50.3	50.3	35.503	0	39.163	270400000	60	24.3905	22.4461	23.0703	25.9454	23.6004	21.894	23.6809	23.1537	0.880847	0.450309
Mediator of RNA polymerase II transcription subunit 23	MED23	Q5JWT2;Q9ULK4-2;Q9ULK4-4;Q9ULK4-5;Q9ULK4-3;Q9ULK4;Q9ULK4-6	Q5JWT2;Q9ULK4-2;Q9ULK4-4;Q9ULK4-5;Q9ULK4-3;Q9ULK4;Q9ULK4-6	protein binding transcription factor activity;transcription coactivator activity;transcription cofactor activity;transcription factor binding transcription factor activity	Med23	6	6	6	5.8	5.8	5.8	157.11	0	9.8335	56132000	26	21.558	21.8625	21.5447	21.3391	21.5224	21.3706	21.9508	22.0005	-0.135015	0.297944
Maternal embryonic leucine zipper kinase	MELK	Q14680-2;Q14680-8;Q14680;Q14680-3;Q14680-4;Q14680-5;Q14680-7;Q14680-6;A0A0D9SGI4	Q14680-2;Q14680-8;Q14680;Q14680-3;Q14680-4;Q14680-5;Q14680-7;Q14680-6	adenyl nucleotide binding;adenyl ribonucleotide binding;ATP binding;binding;calcium ion binding;catalytic activity;cation binding;ion binding;kinase activity;lipid binding;metal ion binding;non-membrane spanning protein tyrosine kinase activity;nucleotide binding;phosphotransferase activity, alcohol group as acceptor;protein kinase activity;protein serine/threonine kinase activity;protein tyrosin…	KA1;Pkinase	10	10	10	26.2	26.2	26.2	66.398	0	33.628	170410000	57	23.4065	23.4702	23.4909	22.7341	23.6464	23.6044	23.6352	23.6202	-0.351101	0.994344
Tyrosine-protein kinase Mer;Receptor protein-tyrosine kinase	MERTK	Q12866;E9PHX8;A0A087WZQ5;H7C3L9	Q12866;E9PHX8;A0A087WZQ5	adenyl nucleotide binding;adenyl ribonucleotide binding;ATP binding;binding;catalytic activity;kinase activity;molecular transducer activity;nucleotide binding;phosphotransferase activity, alcohol group as acceptor;protein kinase activity;protein tyrosine kinase activity;purine nucleotide binding;purine ribonucleoside triphosphate binding;purine ribonucleotide binding;receptor activity;ribonucleo…	fn3;I-set;Pkinase_Tyr	8	8	8	14	14	14	110.25	0	52.607	157210000	52	23.5418	23.4608	23.5591	23.3051	23.4528	23.4285	23.1349	23.3471	0.125876	0.651439
Hepatocyte growth factor receptor	MET	P08581;P08581-2;P08581-3;H7C174;H7C130;C9JKM5	P08581;P08581-2	adenyl nucleotide binding;adenyl ribonucleotide binding;ATP binding;binding;catalytic activity;enzyme binding;hepatocyte growth factor-activated receptor activity;kinase activity;molecular transducer activity;nucleotide binding;phosphatase binding;phosphotransferase activity, alcohol group as acceptor;protein binding;protein kinase activity;protein phosphatase binding;protein tyrosine kinase acti…	Pkinase_Tyr;PSI;Sema;TIG	64	64	63	54.5	54.5	54.5	155.54	0	323.31	7520900000	934	29.082	28.9076	29.1617	28.778	28.9742	29.0564	28.7595	29.094	0.0113063	0.0341426
Macrophage migration inhibitory factor	MIF	P14174	P14174	binding;catalytic activity;chemoattractant activity;cytokine activity;cytokine receptor binding;dopachrome isomerase activity;intramolecular oxidoreductase activity;intramolecular oxidoreductase activity, interconverting keto- and enol-groups;intramolecular oxidoreductase activity, transposing C=C bonds;isomerase activity;phenylpyruvate tautomerase activity;protein binding;receptor binding	MIF	6	6	6	41.7	41.7	41.7	12.476	0	67.341	4159100000	249	28.1857	28.0186	27.9194	28.1447	27.9531	27.5978	27.9829	27.6762	0.264576	1.22023
MICOS complex subunit MIC10	MINOS1-NBL1;MINOS1	R4GNA1;Q5TGZ0;R4GMM1;A0A087WU07;Q5TGZ0-2	R4GNA1;Q5TGZ0;R4GMM1;A0A087WU07;Q5TGZ0-2		DUF543	2	2	2	35.2	35.2	35.2	8.0743	0	3.7923	34088000	23	21.321	21.4231	21.3456	21.0845	21.5085	20.7526	21.4934	NaN	0.0420656	0.0657109
Target of rapamycin complex subunit LST8	MLST8	A0A0A0MR05;Q9BVC4;H3BPT1;H3BN58;Q9BVC4-4;Q9BVC4-5;H3BM50;H3BPU5;H3BSZ4;Q9BVC4-3;H3BR25	A0A0A0MR05;Q9BVC4;H3BPT1;H3BN58;Q9BVC4-4;Q9BVC4-5;H3BM50;H3BPU5;H3BSZ4;Q9BVC4-3		WD40	4	4	4	25.4	25.4	25.4	36.039	0	11.226	89402000	46	22.5059	22.6512	22.154	22.2819	22.7891	NaN	22.5149	22.5612	-0.223495	0.708978
CDK-activating kinase assembly factor MAT1	MNAT1	P51948;P51948-2;H0YJ92;H0YJF2	P51948;P51948-2;H0YJ92	binding;cation binding;ion binding;metal ion binding;protein binding;protein N-terminus binding;transition metal ion binding;zinc ion binding	MAT1	9	9	9	39.5	39.5	39.5	35.823	0	30.436	261560000	59	24.2212	24.3802	24.1981	23.7776	23.8465	24.2007	24.2232	24.1659	0.035162	0.08129
MOB kinase activator 1A;MOB kinase activator 1B	MOB1A;MOB1B	Q9H8S9-2;Q9H8S9;Q7L9L4;Q7L9L4-2;D6RCK3	Q9H8S9-2;Q9H8S9;Q7L9L4;Q7L9L4-2;D6RCK3	binding;cation binding;enzyme activator activity;enzyme binding;enzyme regulator activity;ion binding;kinase activator activity;kinase binding;kinase regulator activity;metal ion binding;protein binding	Mob1_phocein	5	5	5	37.2	37.2	37.2	16.928	0	10.097	50012000	29	21.6489	21.9871	21.895	21.5371	21.9964	21.9365	21.4951	21.8949	-0.0637078	0.158204
ATP synthase subunit a	MT-ATP6	P00846	P00846	cation transmembrane transporter activity;hydrogen ion transmembrane transporter activity;inorganic cation transmembrane transporter activity;ion transmembrane transporter activity;monovalent inorganic cation transmembrane transporter activity;substrate-specific transmembrane transporter activity;substrate-specific transporter activity;transmembrane transporter activity;transporter activity	ATP-synt_A	3	3	3	12.8	12.8	12.8	24.817	0.0022607	2.1119	82190000	10	NaN	22.3037	22.3746	21.9996	22.2922	NaN	NaN	22.4953	-0.167826	0.410987
ATP synthase protein 8	MT-ATP8	P03928	P03928	cation transmembrane transporter activity;hydrogen ion transmembrane transporter activity;inorganic cation transmembrane transporter activity;ion transmembrane transporter activity;monovalent inorganic cation transmembrane transporter activity;substrate-specific transmembrane transporter activity;substrate-specific transporter activity;transmembrane transporter activity;transporter activity	ATP-synt_8	4	4	4	57.4	57.4	57.4	7.9916	0	8.4068	564950000	109	24.7659	25.0217	24.9044	24.4867	25.0711	24.7212	25.0082	25.0834	-0.176316	0.578459
S-methyl-5-thioadenosine phosphorylase;Purine nucleoside phosphorylase	MTAP	B4DUC8;Q13126;Q13126-4;Q13126-3;Q13126-2;J3QSB7;Q13126-7;Q13126-6;Q13126-5;F2Z2F3;F8WES2;J3KRN1	B4DUC8;Q13126;Q13126-4;Q13126-3;Q13126-2;J3QSB7;Q13126-7;Q13126-6;Q13126-5	catalytic activity;phosphorylase activity;purine-nucleoside phosphorylase activity;S-methyl-5-thioadenosine phosphorylase activity;transferase activity;transferase activity, transferring glycosyl groups;transferase activity, transferring hexosyl groups;transferase activity, transferring pentosyl groups	PNP_UDP_1	7	7	7	34	34	34	33.186	0	31.417	242110000	48	24.1096	23.5596	23.6849	24.5767	23.9416	23.3097	23.9983	23.4212	0.31499	0.495875
Mitochondrial carrier homolog 2	MTCH2	Q9Y6C9;E9PIE4	Q9Y6C9;E9PIE4		Mito_carr	3	3	3	20.1	20.1	20.1	33.331	0	32.148	108850000	79	22.2255	23.1099	22.6716	22.3344	NaN	22.5054	22.9349	22.1079	0.0693078	0.0802503
C-1-tetrahydrofolate synthase, cytoplasmic;Methylenetetrahydrofolate dehydrogenase;Methenyltetrahydrofolate cyclohydrolase;Formyltetrahydrofolate synthetase;C-1-tetrahydrofolate synthase, cytoplasmic, N-terminally processed	MTHFD1	F5H2F4;P11586;V9GY75	F5H2F4;P11586	adenyl nucleotide binding;adenyl ribonucleotide binding;ATP binding;binding;catalytic activity;cyclohydrolase activity;formate-tetrahydrofolate ligase activity;hydrolase activity;hydrolase activity, acting on carbon-nitrogen (but not peptide) bonds;hydrolase activity, acting on carbon-nitrogen (but not peptide) bonds, in cyclic amidines;ligase activity;ligase activity, forming carbon-nitrogen bon…	FTHFS;THF_DHG_CYH;THF_DHG_CYH_C	13	13	13	19.3	19.3	19.3	110.61	0	15.517	62709000	25	22.7299	22.1349	NaN	23.6398	22.3047	NaN	22.2651	21.8428	0.69735	0.687003
Serine/threonine-protein kinase mTOR	MTOR	P42345;B1AKP8;B1AKQ2	P42345	5S rDNA binding;adenyl nucleotide binding;adenyl ribonucleotide binding;ATP binding;binding;catalytic activity;DNA binding;drug binding;kinase activity;nucleic acid binding;nucleotide binding;phosphoprotein binding;phosphotransferase activity, alcohol group as acceptor;protein binding;protein dimerization activity;protein kinase activity;protein serine/threonine kinase activity;purine nucleotide …	DUF3385;FAT;FATC;PI3_PI4_kinase;Rapamycin_bind	33	33	33	20.1	20.1	20.1	288.89	0	214.82	845430000	308	25.3724	25.5954	25.6377	25.1327	25.6088	25.4588	25.6208	25.6436	-0.148444	0.560636
Metaxin-2	MTX2	C9JAZ1;O75431;O75431-2;F8WE26;C9JNK6	C9JAZ1;O75431;O75431-2		GST_C_3;Tom37	5	5	5	57.2	57.2	57.2	25.717	0	22.163	143660000	46	22.8913	23.5079	23.1957	22.3253	23.1707	22.8646	23.4922	23.1194	-0.181691	0.263954
Myeloid-associated differentiation marker	MYADM	C9JJV6;C9JZL8;C9J5M0;C9JC07;Q96S97	C9JJV6;C9JZL8;C9J5M0;C9JC07;Q96S97		MARVEL	2	2	2	20.4	20.4	20.4	15.935	0	20.423	28730000	15	NaN	20.8444	21.3064	NaN	NaN	NaN	NaN	21.1373	-0.0619087	0
Myosin-9	MYH9	P35579;P35579-2;Q5BKV1;B1AH99;B1PS43;P35749-4;P35749-3;P35749;P35749-2;A0A0C4DFM8;A1L2Z2;Q7Z406;Q7Z406-6;Q7Z406-2	P35579;P35579-2	actin binding;actin filament binding;actin-dependent ATPase activity;adenyl nucleotide binding;adenyl ribonucleotide binding;ADP binding;ATP binding;ATPase activity;ATPase activity, coupled;binding;catalytic activity;cytoskeletal protein binding;hydrolase activity;hydrolase activity, acting on acid anhydrides;hydrolase activity, acting on acid anhydrides, in phosphorus-containing anhydrides;ident…	IQ;Myosin_head;Myosin_N;Myosin_tail_1	20	20	19	17	17	16.5	226.53	0	47.555	299060000	63	24.3623	23.8443	24.0677	24.9813	23.8051	24.1188	24.0477	24.0437	0.310102	0.567096
Myosin light polypeptide 6	MYL6	F8W1R7;G3V1V0;P60660-2;P60660;G3V1Y7;F8VPF3;J3KND3;G8JLA2;B7Z6Z4;F8VZU9;F8W180;F8VXL3;H0YI43;F8W1I5;P14649	F8W1R7;G3V1V0;P60660-2;P60660;G3V1Y7;F8VPF3;J3KND3;G8JLA2;B7Z6Z4;F8VZU9;F8W180	actin-dependent ATPase activity;ATPase activity;ATPase activity, coupled;binding;calcium ion binding;catalytic activity;cation binding;hydrolase activity;hydrolase activity, acting on acid anhydrides;hydrolase activity, acting on acid anhydrides, in phosphorus-containing anhydrides;ion binding;metal ion binding;motor activity;nucleoside-triphosphatase activity;pyrophosphatase activity;structural …	EF-hand_6;EF-hand_7	4	4	4	33.1	33.1	33.1	16.29	0	8.7746	120460000	49	22.8122	22.5759	22.5775	23.6392	22.8871	22.4061	22.6633	22.631	0.254304	0.415907
Nascent polypeptide-associated complex subunit alpha, muscle-specific form;Nascent polypeptide-associated complex subunit alpha	NACA	E9PAV3;F8VZJ2;H0YHX9;Q13765;E9PAV3-2;F8W0W4;F8W1N5;F8VNW4	E9PAV3;F8VZJ2;H0YHX9;Q13765;E9PAV3-2;F8W0W4	binding;DNA binding;nucleic acid binding;protein binding;protein binding transcription factor activity;TBP-class protein binding;transcription coactivator activity;transcription cofactor activity;transcription factor binding;transcription factor binding transcription factor activity	NAC	5	5	5	5.2	5.2	5.2	205.42	0	14.045	65517000	29	22.031	22.045	21.7525	23.1009	21.8376	21.5436	21.96	NaN	0.451976	0.564785
Nucleosome assembly protein 1-like 1	NAP1L1	F8VUX1;F8VY35;F8W0J6;F5H4R6;H0YIV4;P55209-2;P55209;F8W020;F8VXI6;F8VV59;B7Z9C2;P55209-3;H0YHC3;F8W118;F8W543;H0YH88;F8VRJ2;F8VVB5;B7Z4K9	F8VUX1;F8VY35;F8W0J6;F5H4R6;H0YIV4;P55209-2;P55209;F8W020;F8VXI6;F8VV59;B7Z9C2;P55209-3;H0YHC3;F8W118;F8W543;H0YH88		NAP	6	6	5	44.7	44.7	40.1	27.724	0	10.983	102220000	16	23.7427	NaN	21.9211	24.3317	22.8679	NaN	22.5784	22.6638	0.628503	0.358353
Nuclear autoantigenic sperm protein	NASP	P49321;P49321-3;P49321-2;P49321-4;E9PI86;Q5T624;E9PRH9;H0YF33;E9PPR5;E9PPQ8;H0YDS9;E9PNB5	P49321;P49321-3;P49321-2;P49321-4;E9PI86;Q5T624	binding;heat shock protein binding;Hsp90 protein binding;protein binding;protein complex binding	SHNi-TPR;TPR_1	8	8	8	21.4	21.4	21.4	85.237	0	39.721	37406000	22	21.9744	NaN	NaN	22.9095	NaN	NaN	NaN	21.0713	1.37064	0
Nucleolin	NCL	P19338;H7BY16;C9JYW2;C9JLB1;C9J1H7;C9JWL1	P19338	binding;DNA binding;identical protein binding;nucleic acid binding;nucleotide binding;protein binding;protein C-terminus binding;RNA binding;sequence-specific DNA binding;telomeric DNA binding	RRM_1	17	17	17	31.4	31.4	31.4	76.613	0	49.106	436220000	148	24.8926	24.2549	24.2937	25.4221	24.5766	24.3504	24.9396	24.3601	0.159191	0.203888
Nucleoporin NDC1	NDC1	Q9BTX1-6;Q9BTX1-5;Q9BTX1-2;Q9BTX1;Q9BTX1-4;Q9BTX1-3	Q9BTX1-6;Q9BTX1-5;Q9BTX1-2;Q9BTX1;Q9BTX1-4	structural constituent of nuclear pore;structural molecule activity	Ndc1_Nup	10	10	10	27.5	27.5	27.5	63.157	0	45.036	293520000	122	23.7479	24.0393	24.1612	23.5519	24.2297	23.8342	24.2792	24.1443	-0.246758	0.703077
NADH dehydrogenase [ubiquinone] 1 alpha subcomplex subunit 10, mitochondrial	NDUFA10	A0A087WXC5;E7ESZ7;O95299;O95299-2;Q8N1B9;C9J6X0	A0A087WXC5;E7ESZ7;O95299;O95299-2;Q8N1B9;C9J6X0	adenyl nucleotide binding;adenyl ribonucleotide binding;ATP binding;binding;catalytic activity;kinase activity;NADH dehydrogenase (quinone) activity;NADH dehydrogenase (ubiquinone) activity;NADH dehydrogenase activity;nucleobase-containing compound kinase activity;nucleoside kinase activity;nucleotide binding;oxidoreductase activity;oxidoreductase activity, acting on NADH or NADPH;oxidoreductase …	dNK	3	3	3	16.1	16.1	16.1	40.836	0	21.895	89029000	30	22.3891	21.8979	22.2908	22.0409	22.6025	NaN	22.4536	NaN	-0.373394	1.00054
NADH dehydrogenase [ubiquinone] 1 alpha subcomplex subunit 12	NDUFA12	Q9UI09;F8VRD8;Q9UI09-2;H0YIT1;H0YID5;F8VXI1	Q9UI09	catalytic activity;electron carrier activity;NADH dehydrogenase (quinone) activity;NADH dehydrogenase (ubiquinone) activity;NADH dehydrogenase activity;oxidoreductase activity;oxidoreductase activity, acting on NADH or NADPH;oxidoreductase activity, acting on NADH or NADPH, quinone or similar compound as acceptor		7	7	7	60	60	60	17.114	0	15.133	174780000	50	23.0933	23.0128	22.9355	22.8113	23.6749	23.3798	23.3631	23.3791	-0.485997	2.63053
NADH dehydrogenase [ubiquinone] 1 alpha subcomplex subunit 13	NDUFA13	Q9P0J0;Q9P0J0-2;B4DEZ3;K7EJE1;E7ENQ6;U3KQP3	Q9P0J0;Q9P0J0-2;B4DEZ3;K7EJE1;E7ENQ6;U3KQP3	adenyl nucleotide binding;adenyl ribonucleotide binding;ATP binding;binding;catalytic activity;NADH dehydrogenase (quinone) activity;NADH dehydrogenase (ubiquinone) activity;NADH dehydrogenase activity;nucleotide binding;oxidoreductase activity;oxidoreductase activity, acting on NADH or NADPH;oxidoreductase activity, acting on NADH or NADPH, quinone or similar compound as acceptor;purine nucleoti…	GRIM-19;YjeF_N	4	4	4	47.9	47.9	47.9	16.698	0	4.5383	109890000	37	22.7038	22.4208	22.6474	22.5537	22.7661	22.5657	22.6452	22.6812	-0.0831208	0.512343
NADH dehydrogenase [ubiquinone] 1 alpha subcomplex subunit 2	NDUFA2	O43678;O43678-2	O43678;O43678-2	catalytic activity;NADH dehydrogenase (quinone) activity;NADH dehydrogenase (ubiquinone) activity;NADH dehydrogenase activity;oxidoreductase activity;oxidoreductase activity, acting on NADH or NADPH;oxidoreductase activity, acting on NADH or NADPH, quinone or similar compound as acceptor	L51_S25_CI-B8	5	5	5	74.7	74.7	74.7	10.921	0	19.432	317610000	52	24.0028	24.1992	24.4118	24.1581	24.2296	23.9585	24.0957	24.0895	0.0996647	0.442194
Cytochrome c oxidase subunit NDUFA4	NDUFA4	O00483	O00483	binding;catalytic activity;NADH dehydrogenase (quinone) activity;NADH dehydrogenase (ubiquinone) activity;NADH dehydrogenase activity;oxidoreductase activity;oxidoreductase activity, acting on NADH or NADPH;oxidoreductase activity, acting on NADH or NADPH, quinone or similar compound as acceptor;protein binding;protein complex binding	B12D	5	5	5	90.1	90.1	90.1	9.3697	0	14.194	358110000	33	24.5119	24.443	24.0845	24.1932	24.1391	24.3688	24.3471	24.5087	-0.032805	0.0945463
NADH dehydrogenase [ubiquinone] 1 alpha subcomplex subunit 5	NDUFA5	Q16718;A0A087X1G1;H7BYD0;Q16718-2;F8WAS3;A0A087WXR5;C9IZN5	Q16718;A0A087X1G1;H7BYD0;Q16718-2;F8WAS3;A0A087WXR5	catalytic activity;NADH dehydrogenase (quinone) activity;NADH dehydrogenase (ubiquinone) activity;NADH dehydrogenase activity;oxidoreductase activity;oxidoreductase activity, acting on NADH or NADPH;oxidoreductase activity, acting on NADH or NADPH, quinone or similar compound as acceptor	ETC_C1_NDUFA5	6	6	6	69	69	69	13.459	0	58.24	320240000	74	23.9365	23.7343	23.8774	23.7376	24.4978	23.9046	24.1116	24.2248	-0.363252	1.45896
NADH dehydrogenase [ubiquinone] 1 alpha subcomplex subunit 6	NDUFA6	A0A0C4DGS0;P56556;R4GN43	A0A0C4DGS0;P56556;R4GN43	catalytic activity;NADH dehydrogenase (quinone) activity;NADH dehydrogenase (ubiquinone) activity;NADH dehydrogenase activity;oxidoreductase activity;oxidoreductase activity, acting on NADH or NADPH;oxidoreductase activity, acting on NADH or NADPH, quinone or similar compound as acceptor	Complex1_LYR	6	6	6	44.5	44.5	44.5	15.136	0	11.993	175720000	52	NaN	23.5745	23.5138	22.5447	23.7915	23.186	23.5308	23.5152	-0.294897	0.406007
NADH dehydrogenase [ubiquinone] 1 alpha subcomplex subunit 7	NDUFA7	O95182;M0R0N0;M0R1K9	O95182	catalytic activity;NADH dehydrogenase (quinone) activity;NADH dehydrogenase (ubiquinone) activity;NADH dehydrogenase activity;oxidoreductase activity;oxidoreductase activity, acting on NADH or NADPH;oxidoreductase activity, acting on NADH or NADPH, quinone or similar compound as acceptor	CI-B14_5a	5	5	5	44.2	44.2	44.2	12.551	0	19.407	105320000	46	22.2703	22.4034	22.4305	22.4576	22.8566	22.5383	22.9705	22.6495	-0.363233	1.84795
NADH dehydrogenase [ubiquinone] 1 alpha subcomplex subunit 8	NDUFA8	P51970	P51970	binding;catalytic activity;NADH dehydrogenase (quinone) activity;NADH dehydrogenase (ubiquinone) activity;NADH dehydrogenase activity;oxidoreductase activity;oxidoreductase activity, acting on NADH or NADPH;oxidoreductase activity, acting on NADH or NADPH, quinone or similar compound as acceptor;protein binding;protein complex binding	CHCH	4	4	4	22.7	22.7	22.7	20.105	0	6.7846	80837000	15	22.2938	21.8052	22.2597	NaN	NaN	NaN	NaN	NaN	NaN	0
NADH dehydrogenase [ubiquinone] 1 alpha subcomplex subunit 9, mitochondrial	NDUFA9	Q16795;F5H0J3;F5GY40	Q16795	3-beta-hydroxy-delta5-steroid dehydrogenase activity;binding;catalytic activity;coenzyme binding;cofactor binding;NADH dehydrogenase (quinone) activity;NADH dehydrogenase (ubiquinone) activity;NADH dehydrogenase activity;oxidoreductase activity;oxidoreductase activity, acting on CH-OH group of donors;oxidoreductase activity, acting on NADH or NADPH;oxidoreductase activity, acting on NADH or NADPH…	3Beta_HSD;Epimerase	9	9	9	32.4	32.4	32.4	42.509	0	31.139	214210000	75	23.6624	23.7247	23.4045	23.4593	23.7964	23.6618	23.9432	23.8203	-0.242702	1.34027
NADH dehydrogenase [ubiquinone] 1 beta subcomplex subunit 1	NDUFB1	O75438;O75438-2	O75438;O75438-2	catalytic activity;NADH dehydrogenase (quinone) activity;NADH dehydrogenase (ubiquinone) activity;NADH dehydrogenase activity;oxidoreductase activity;oxidoreductase activity, acting on NADH or NADPH;oxidoreductase activity, acting on NADH or NADPH, quinone or similar compound as acceptor	NADH_oxidored	6	6	6	79.3	79.3	79.3	6.9611	0	19.856	108050000	21	22.5687	22.7614	22.4456	NaN	23.0088	22.475	22.9716	22.7374	-0.206351	0.574544
NADH dehydrogenase [ubiquinone] 1 beta subcomplex subunit 10	NDUFB10	O96000;O96000-2;H3BV16;H3BPJ9	O96000;O96000-2;H3BV16;H3BPJ9	catalytic activity;NADH dehydrogenase (quinone) activity;NADH dehydrogenase (ubiquinone) activity;NADH dehydrogenase activity;oxidoreductase activity;oxidoreductase activity, acting on NADH or NADPH;oxidoreductase activity, acting on NADH or NADPH, quinone or similar compound as acceptor	NDUFB10	9	9	9	61.6	61.6	61.6	20.776	0	21.286	441150000	58	24.4613	25.0089	24.6308	24.3056	24.928	24.5303	24.6532	24.8621	-0.141746	0.343242
NADH dehydrogenase [ubiquinone] 1 beta subcomplex subunit 3	NDUFB3	O43676;C9JKQ2	O43676;C9JKQ2	catalytic activity;NADH dehydrogenase (quinone) activity;NADH dehydrogenase (ubiquinone) activity;NADH dehydrogenase activity;oxidoreductase activity;oxidoreductase activity, acting on NADH or NADPH;oxidoreductase activity, acting on NADH or NADPH, quinone or similar compound as acceptor	NDUF_B12	6	6	6	66.3	66.3	66.3	11.402	0	19.47	185250000	19	NaN	23.4466	23.4639	23.026	NaN	23.2111	23.6234	23.6065	-0.168163	0.356029
NADH dehydrogenase [ubiquinone] 1 beta subcomplex subunit 6	NDUFB6	O95139;A0A087WZX2;O95139-2	O95139;A0A087WZX2	catalytic activity;NADH dehydrogenase (quinone) activity;NADH dehydrogenase (ubiquinone) activity;NADH dehydrogenase activity;oxidoreductase activity;oxidoreductase activity, acting on NADH or NADPH;oxidoreductase activity, acting on NADH or NADPH, quinone or similar compound as acceptor	NDUF_B6	6	6	6	53.9	53.9	53.9	15.489	0	14.288	156940000	48	22.7781	23.034	23.0305	22.5779	23.0785	22.5902	23.1182	23.3359	-0.175606	0.402536
NADH dehydrogenase [ubiquinone] 1 beta subcomplex subunit 7	NDUFB7	P17568;M0R3B8	P17568	catalytic activity;NADH dehydrogenase (quinone) activity;NADH dehydrogenase (ubiquinone) activity;NADH dehydrogenase activity;oxidoreductase activity;oxidoreductase activity, acting on NADH or NADPH;oxidoreductase activity, acting on NADH or NADPH, quinone or similar compound as acceptor	NDUF_B7	4	4	4	51.8	51.8	51.8	16.402	0	9.2436	112060000	45	22.265	22.8707	22.9334	22.6177	22.6857	22.4974	23.0179	23.1424	-0.164127	0.329091
NADH dehydrogenase [ubiquinone] 1 beta subcomplex subunit 9	NDUFB9	Q9Y6M9;E9PH64;E7EWZ0;E9PF49	Q9Y6M9;E9PH64;E7EWZ0;E9PF49	catalytic activity;NADH dehydrogenase (quinone) activity;NADH dehydrogenase (ubiquinone) activity;NADH dehydrogenase activity;oxidoreductase activity;oxidoreductase activity, acting on NADH or NADPH;oxidoreductase activity, acting on NADH or NADPH, quinone or similar compound as acceptor	Complex1_LYR	10	10	10	68.2	68.2	68.2	21.831	0	17.434	272230000	67	23.6049	24.2445	23.8037	23.8646	23.9575	23.917	24.2948	24.0295	-0.170289	0.48982
NADH-ubiquinone oxidoreductase 75 kDa subunit, mitochondrial	NDUFS1	P28331;P28331-2;P28331-4;P28331-5;B4DJ81;P28331-3;C9JPQ5;F8WDL5	P28331;P28331-2;P28331-4;P28331-5;B4DJ81;P28331-3	2 iron, 2 sulfur cluster binding;4 iron, 4 sulfur cluster binding;binding;catalytic activity;cation binding;electron carrier activity;ion binding;iron-sulfur cluster binding;metal cluster binding;metal ion binding;NADH dehydrogenase (quinone) activity;NADH dehydrogenase (ubiquinone) activity;NADH dehydrogenase activity;oxidoreductase activity;oxidoreductase activity, acting on NADH or NADPH;oxido…	DUF1982;Molybdopterin;NADH-G_4Fe-4S_3	29	29	29	55.7	55.7	55.7	79.467	0	164.6	1216500000	321	26.0545	26.1262	25.9758	25.8679	26.4639	25.9183	26.4078	26.2071	-0.243158	0.913173
NADH dehydrogenase [ubiquinone] iron-sulfur protein 2, mitochondrial	NDUFS2	O75306;O75306-2	O75306;O75306-2	4 iron, 4 sulfur cluster binding;binding;catalytic activity;cation binding;coenzyme binding;cofactor binding;electron carrier activity;enzyme binding;ion binding;iron-sulfur cluster binding;metal cluster binding;metal ion binding;NAD binding;NADH dehydrogenase (quinone) activity;NADH dehydrogenase (ubiquinone) activity;NADH dehydrogenase activity;nucleotide binding;oxidoreductase activity;oxidore…	Complex1_49kDa	8	8	8	30.9	30.9	30.9	52.545	0	39.783	199870000	67	23.4554	23.5406	23.4061	23.3152	23.8212	23.242	23.708	23.304	-0.0894589	0.238638
NADH dehydrogenase [ubiquinone] iron-sulfur protein 3, mitochondrial	NDUFS3	O75489;E9PKL8;G3V194;E9PS48;O75489-2	O75489	catalytic activity;electron carrier activity;NADH dehydrogenase (quinone) activity;NADH dehydrogenase (ubiquinone) activity;NADH dehydrogenase activity;oxidoreductase activity;oxidoreductase activity, acting on NADH or NADPH;oxidoreductase activity, acting on NADH or NADPH, quinone or similar compound as acceptor	Complex1_30kDa	4	4	4	21.2	21.2	21.2	30.241	0	5.5921	99439000	13	22.7715	NaN	22.3998	NaN	22.5531	NaN	NaN	22.1655	0.226303	0.311517
NADH dehydrogenase [ubiquinone] iron-sulfur protein 4, mitochondrial	NDUFS4	O43181;H0Y9M8	O43181	catalytic activity;NADH dehydrogenase (quinone) activity;NADH dehydrogenase (ubiquinone) activity;NADH dehydrogenase activity;oxidoreductase activity;oxidoreductase activity, acting on NADH or NADPH;oxidoreductase activity, acting on NADH or NADPH, quinone or similar compound as acceptor	ETC_C1_NDUFA4	6	6	6	44.6	44.6	44.6	20.108	0	18.13	94611000	21	22.323	22.6609	22.5344	22.3959	22.7136	NaN	NaN	22.6033	-0.179898	0.698694
NADH dehydrogenase [ubiquinone] iron-sulfur protein 6, mitochondrial	NDUFS6	O75380;D6RBT3	O75380	catalytic activity;electron carrier activity;NADH dehydrogenase (quinone) activity;NADH dehydrogenase (ubiquinone) activity;NADH dehydrogenase activity;oxidoreductase activity;oxidoreductase activity, acting on NADH or NADPH;oxidoreductase activity, acting on NADH or NADPH, quinone or similar compound as acceptor	zf-CHCC	7	7	7	62.9	62.9	62.9	13.711	0	28.897	281680000	89	23.8974	24.0222	23.798	23.7471	24.0634	24.1466	24.0293	24.1669	-0.235347	1.84494
NADH dehydrogenase [ubiquinone] iron-sulfur protein 7, mitochondrial	NDUFS7	O75251;F5H5N1;A0A087WXF6;A0A087WTI3;F5GXJ1;O75251-2	O75251;F5H5N1;A0A087WXF6;A0A087WTI3;F5GXJ1;O75251-2	4 iron, 4 sulfur cluster binding;binding;catalytic activity;cation binding;cofactor binding;ion binding;iron-sulfur cluster binding;metal cluster binding;metal ion binding;NADH dehydrogenase (quinone) activity;NADH dehydrogenase (ubiquinone) activity;NADH dehydrogenase activity;oxidoreductase activity;oxidoreductase activity, acting on NADH or NADPH;oxidoreductase activity, acting on NADH or NADP…	Oxidored_q6	6	6	6	40.8	40.8	40.8	23.563	0	21.12	164800000	77	23.2248	23.4989	23.1264	23.1816	23.3006	23.4096	23.4914	23.2484	-0.104598	0.47877
NADH dehydrogenase [ubiquinone] iron-sulfur protein 8, mitochondrial	NDUFS8	E9PPW7;O00217;E9PKH6;E9PN51;F8W9K7	E9PPW7;O00217;E9PKH6;E9PN51;F8W9K7	4 iron, 4 sulfur cluster binding;binding;catalytic activity;cation binding;ion binding;iron-sulfur cluster binding;metal cluster binding;metal ion binding;NADH dehydrogenase (quinone) activity;NADH dehydrogenase (ubiquinone) activity;NADH dehydrogenase activity;oxidoreductase activity;oxidoreductase activity, acting on NADH or NADPH;oxidoreductase activity, acting on NADH or NADPH, quinone or sim…	Fer4_7	5	5	5	38.6	38.6	38.6	20.656	0	16.691	224640000	60	23.9897	23.6255	23.4885	23.6928	23.8252	23.5909	23.6041	23.7607	0.00388575	0.0108397
NADH dehydrogenase [ubiquinone] flavoprotein 1, mitochondrial	NDUFV1	G3V0I5;P49821-2;P49821;B4DE93;E9PLC6;E9PQP1;E9PMX3;E9PJL9;H0YE81;E9PPR0;H0YD04;E9PPD6;E9PPS5	G3V0I5;P49821-2;P49821;B4DE93;E9PLC6	4 iron, 4 sulfur cluster binding;binding;catalytic activity;cation binding;coenzyme binding;cofactor binding;FMN binding;ion binding;iron-sulfur cluster binding;metal cluster binding;metal ion binding;NAD binding;NADH dehydrogenase (quinone) activity;NADH dehydrogenase (ubiquinone) activity;NADH dehydrogenase activity;nucleotide binding;oxidoreductase activity;oxidoreductase activity, acting on N…	Complex1_51K;NADH_4Fe-4S;SLBB	15	15	15	54	54	54	50.054	0	108.55	767200000	249	25.4246	25.5054	25.3687	25.0183	25.6103	25.2797	25.5748	25.5503	-0.174501	0.633768
NADH dehydrogenase [ubiquinone] flavoprotein 2, mitochondrial	NDUFV2	E7EPT4;P19404	E7EPT4;P19404	2 iron, 2 sulfur cluster binding;binding;catalytic activity;cation binding;electron carrier activity;ion binding;iron-sulfur cluster binding;metal cluster binding;metal ion binding;NADH dehydrogenase (quinone) activity;NADH dehydrogenase (ubiquinone) activity;NADH dehydrogenase activity;oxidoreductase activity;oxidoreductase activity, acting on NADH or NADPH;oxidoreductase activity, acting on NAD…		3	3	3	20.2	20.2	20.2	27.907	0	9.1831	110900000	27	22.4594	22.6277	22.8112	22.5892	23.0518	22.5808	22.7455	23.0927	-0.245825	0.865734
NADH dehydrogenase [ubiquinone] flavoprotein 3, mitochondrial	NDUFV3	P56181-2;P56181	P56181-2	catalytic activity;NADH dehydrogenase (quinone) activity;NADH dehydrogenase (ubiquinone) activity;NADH dehydrogenase activity;oxidoreductase activity;oxidoreductase activity, acting on NADH or NADPH;oxidoreductase activity, acting on NADH or NADPH, quinone or similar compound as acceptor		4	4	4	21.8	21.8	21.8	50.983	0	20.507	78563000	43	NaN	22.3131	22.117	22.3039	22.4528	22.1005	22.4657	22.4606	-0.125237	0.467629
Serine/threonine-protein kinase Nek1	NEK1	Q96PY6-4;Q96PY6-2;Q96PY6;Q96PY6-6;Q96PY6-3;Q96PY6-5;H0Y8M6;D6RBG5	Q96PY6-4;Q96PY6-2;Q96PY6;Q96PY6-6;Q96PY6-3	adenyl nucleotide binding;adenyl ribonucleotide binding;ATP binding;binding;catalytic activity;cation binding;ion binding;kinase activity;MAP kinase kinase activity;metal ion binding;nucleotide binding;phosphotransferase activity, alcohol group as acceptor;protein kinase activity;protein serine/threonine kinase activity;protein serine/threonine/tyrosine kinase activity;protein tyrosine kinase act…	Pkinase	24	24	24	32.8	32.8	32.8	135.3	0	55.046	449890000	145	24.5318	24.6741	24.8438	24.5684	24.8581	24.759	24.6961	24.7662	-0.115335	0.72761
Serine/threonine-protein kinase Nek3	NEK3	A0A087WY58;P51956;P51956-2;A0A087X203;F8VTT4;F8VV00;A0A087X030	A0A087WY58;P51956;P51956-2;A0A087X203	adenyl nucleotide binding;adenyl ribonucleotide binding;ATP binding;binding;catalytic activity;cation binding;ion binding;kinase activity;metal ion binding;nucleotide binding;phosphotransferase activity, alcohol group as acceptor;protein kinase activity;protein serine/threonine kinase activity;purine nucleotide binding;purine ribonucleoside triphosphate binding;purine ribonucleotide binding;ribon…	Pkinase	22	22	22	67.4	67.4	67.4	56.684	0	120.11	1967600000	306	26.8383	27.0997	26.821	26.5254	27.0052	26.9319	26.8817	26.9137	-0.111986	0.411499
Serine/threonine-protein kinase Nek9	NEK9	Q8TD19;G3V2Z5;G3V459;G3V5V0;REV__Q5SQT3;REV__Q9P0M6	Q8TD19	adenyl nucleotide binding;adenyl ribonucleotide binding;ATP binding;binding;catalytic activity;cation binding;enzyme binding;ion binding;kinase activity;kinase binding;metal ion binding;nucleotide binding;phosphotransferase activity, alcohol group as acceptor;protein binding;protein kinase activity;protein kinase binding;protein serine/threonine kinase activity;purine nucleotide binding;purine ri…	Pkinase;RCC1	104	104	104	73.1	73.1	73.1	107.17	0	323.31	65564000000	3375	32.0344	32.0313	32.0612	31.746	31.8397	32.0135	31.7484	31.9297	0.0853982	0.40041
NHP2-like protein 1;NHP2-like protein 1, N-terminally processed	NHP2L1	B1AHD1;P55769	B1AHD1;P55769	binding;box C/D snoRNA binding;nucleic acid binding;RNA binding;snoRNA binding;snRNA binding;U3 snoRNA binding;U4 snRNA binding	Ribosomal_L7Ae	5	5	5	55.3	55.3	55.3	14.627	0	29.602	92618000	58	21.6621	21.997	22.0419	21.8062	21.8421	23.225	22.8017	22.5787	-0.735057	1.29075
Protein NipSnap homolog 1	NIPSNAP1	Q9BPW8;H7C2U6;C9JDV8;F8WCR5	Q9BPW8;H7C2U6	binding;neurotransmitter binding	NIPSNAP	21	21	21	74.6	74.6	74.6	33.31	0	168.53	4785400000	469	28.1599	28.1731	27.9606	27.7737	28.4565	28.0121	28.3664	28.2405	-0.252037	0.954232
NF-kappa-B-activating protein	NKAP	Q8N5F7;Q5M9Q1	Q8N5F7	binding;chromatin binding;chromatin DNA binding;DNA binding;nucleic acid binding;structure-specific DNA binding	SynMuv_product	5	5	5	26.7	26.7	26.7	47.138	0	39.955	262020000	40	24.3138	24.4146	24.1977	24.3158	23.9077	23.9839	24.0989	24.0842	0.291824	2.44205
Nucleoside diphosphate kinase A	NME1	P15531;P15531-2	P15531;P15531-2	adenyl nucleotide binding;adenyl ribonucleotide binding;ATP binding;binding;catalytic activity;cation binding;deoxyribonuclease activity;DNA binding;GTP binding;guanyl nucleotide binding;guanyl ribonucleotide binding;hydrolase activity;hydrolase activity, acting on ester bonds;identical protein binding;ion binding;kinase activity;magnesium ion binding;metal ion binding;nuclease activity;nucleic a…	NDK	12	3	3	86.2	25	25	17.149	0	4.4647	162890000	17	23.4267	22.4457	23.5737	24.6443	23.325	23.4113	22.6297	NaN	0.400644	0.288723
Nucleoside diphosphate kinase;Nucleoside diphosphate kinase B	NME1-NME2;NME2;NME1	Q32Q12;P22392-2;P22392;J3KPD9;E7ERL0;O60361;F6XY72;E5RHP0;C9K028	Q32Q12;P22392-2;P22392;J3KPD9;E7ERL0	adenyl nucleotide binding;adenyl ribonucleotide binding;ATP binding;binding;catalytic activity;cation binding;DNA binding;ion binding;kinase activity;metal ion binding;nucleic acid binding;nucleic acid binding transcription factor activity;nucleobase-containing compound kinase activity;nucleoside diphosphate kinase activity;nucleotide binding;phosphotransferase activity, alcohol group as acceptor…	NDK	15	15	6	75.3	75.3	25	32.642	0	41.091	668220000	182	25.566	24.4923	24.6448	26.3526	25.2516	24.2324	25.1308	24.6236	0.454351	0.405998
NAD(P) transhydrogenase, mitochondrial	NNT	Q13423;E9PCX7;D6RAI5;D6RHU2;H0Y8P5;D6RCR6	Q13423;E9PCX7	binding;catalytic activity;cation transmembrane transporter activity;coenzyme binding;cofactor binding;hydrogen ion transmembrane transporter activity;inorganic cation transmembrane transporter activity;ion transmembrane transporter activity;monovalent inorganic cation transmembrane transporter activity;NAD binding;NAD(P)+ transhydrogenase (AB-specific) activity;NAD(P)+ transhydrogenase (B-specif…	AlaDh_PNT_C;AlaDh_PNT_N;DUF3814;PNTB	32	32	32	35.7	35.7	35.7	113.89	0	212.64	1862600000	481	26.2194	26.5409	26.5222	26.627	27.2061	26.8569	27.3659	27.0957	-0.653736	2.47792
Nucleolar and coiled-body phosphoprotein 1	NOLC1	A0A0A0MRM9;Q14978-2;Q14978;S4R349;S4R402	A0A0A0MRM9;Q14978-2;Q14978	adenyl nucleotide binding;adenyl ribonucleotide binding;ATP binding;binding;GTP binding;guanyl nucleotide binding;guanyl ribonucleotide binding;nucleotide binding;purine nucleotide binding;purine ribonucleoside triphosphate binding;purine ribonucleotide binding;ribonucleotide binding	SRP40_C	13	13	2	20.8	20.8	5.2	74.543	0	173.66	1537300000	220	26.5259	26.5752	26.7447	26.149	26.7502	26.999	26.6302	26.9056	-0.322551	1.12548
Nucleolar and coiled-body phosphoprotein 1	NOLC1	Q14978-3;S4R341	Q14978-3	adenyl nucleotide binding;adenyl ribonucleotide binding;ATP binding;binding;GTP binding;guanyl nucleotide binding;guanyl ribonucleotide binding;nucleotide binding;purine nucleotide binding;purine ribonucleoside triphosphate binding;purine ribonucleotide binding;ribonucleotide binding	SRP40_C	12	1	1	19.1	3.4	3.4	73.744	0	23.331	201750000	43	NaN	23.3133	23.7731	23.2412	24.1279	23.8413	23.7067	23.7449	-0.412704	1.15772
Non-POU domain-containing octamer-binding protein	NONO	Q15233-2;Q15233;H7C367;C9JYS8;C9IZL7;C9J4X2	Q15233-2;Q15233;H7C367;C9JYS8	binding;core promoter binding;DNA binding;identical protein binding;nucleic acid binding;nucleotide binding;protein binding;regulatory region DNA binding;regulatory region nucleic acid binding;transcription regulatory region DNA binding	NOPS;RRM_1	11	11	11	39.3	39.3	39.3	43.866	0	82.365	371730000	114	24.2473	25.3599	24.0088	24.8236	24.6592	23.9502	24.2267	23.8465	0.439248	0.585126
Nucleolar protein 56	NOP56	O00567;H0Y653;H0YDU4;Q5JXT2	O00567;H0Y653;H0YDU4	binding;nucleic acid binding;RNA binding;snoRNA binding	Nop;NOP5NT;NOSIC	13	13	13	32.3	32.3	32.3	66.049	0	31.649	119890000	60	22.1136	22.5716	22.8789	21.534	21.8244	23.9849	21.4848	23.025	-0.305255	0.18573
Nucleolar protein 58	NOP58	Q9Y2X3;H7BZ72	Q9Y2X3	binding;nucleic acid binding;RNA binding;snoRNA binding	Nop;NOP5NT;NOSIC	11	11	11	31.8	31.8	31.8	59.578	0	55.32	82259000	57	21.4974	21.6888	22.1047	21.5623	NaN	23.3931	21.4051	22.4585	-0.705631	0.65253
Puromycin-sensitive aminopeptidase	NPEPPS	P55786;E9PLK3;P55786-2;A6NEC2;E9PPD4;H0YDG0;E9PP11;A6NEC2-3	P55786;E9PLK3;P55786-2	aminopeptidase activity;binding;catalytic activity;cation binding;exopeptidase activity;hydrolase activity;ion binding;metal ion binding;metallopeptidase activity;peptidase activity;peptidase activity, acting on L-amino acid peptides;transition metal ion binding;zinc ion binding	ERAP1_C;Peptidase_M1	6	6	6	9.6	9.6	9.6	103.28	0	22.114	52655000	18	22.1417	NaN	21.6	23.1292	22.1277	21.7265	21.9441	NaN	0.357536	0.316443
Nucleophosmin	NPM1	P06748-2;P06748;P06748-3;E5RI98	P06748-2;P06748;P06748-3	binding;enzyme binding;enzyme inhibitor activity;enzyme regulator activity;histone binding;identical protein binding;kinase binding;kinase inhibitor activity;kinase regulator activity;NF-kappaB binding;nucleic acid binding;protein binding;protein binding transcription factor activity;protein dimerization activity;protein heterodimerization activity;protein homodimerization activity;protein kinase…		13	13	13	61.5	61.5	61.5	29.464	0	63.479	653810000	111	25.3014	24.6241	24.7934	25.3073	24.3981	25.8519	25.2078	25.2397	-0.167826	0.190576
NAD(P)H dehydrogenase [quinone] 1	NQO1	H3BNV2;P15559-2;P15559;B4DLR8;H3BRK3;P15559-3	H3BNV2;P15559-2;P15559;B4DLR8;H3BRK3;P15559-3	antioxidant activity;binding;catalytic activity;cytochrome-b5 reductase activity;identical protein binding;NAD(P)H dehydrogenase (quinone) activity;oxidoreductase activity;oxidoreductase activity, acting on NADH or NADPH;oxidoreductase activity, acting on NADH or NADPH, heme protein as acceptor;oxidoreductase activity, acting on NADH or NADPH, quinone or similar compound as acceptor;oxidoreductas…	Flavodoxin_2	4	4	4	29.6	29.6	29.6	28.494	0	8.5423	11771000	10	20.8611	21.1042	NaN	NaN	NaN	NaN	20.566	NaN	0.416645	0
Ribosyldihydronicotinamide dehydrogenase [quinone]	NQO2	P16083;Q5TD07;Q5TD05;A2A2U4	P16083;Q5TD07;Q5TD05	binding;catalytic activity;cation binding;dihydronicotinamide riboside quinone reductase activity;electron carrier activity;ion binding;metal ion binding;NADPH dehydrogenase (quinone) activity;NADPH dehydrogenase activity;oxidoreductase activity;oxidoreductase activity, acting on NADH or NADPH	Flavodoxin_2	22	22	22	84	84	84	25.918	0	193.78	2277000000	347	26.5614	26.8783	26.6057	26.2236	26.887	26.7248	26.8663	26.7146	-0.230969	0.811199
tRNA (cytosine(34)-C(5))-methyltransferase	NSUN2	Q08J23-3;Q08J23-2;Q08J23	Q08J23-3;Q08J23-2;Q08J23	binding;catalytic activity;methyltransferase activity;nucleic acid binding;RNA binding;RNA methyltransferase activity;S-adenosylmethionine-dependent methyltransferase activity;transferase activity;transferase activity, transferring one-carbon groups;tRNA (cytosine) methyltransferase activity;tRNA (cytosine-5-)-methyltransferase activity;tRNA binding;tRNA methyltransferase activity	Nol1_Nop2_Fmu	3	3	3	7.5	7.5	7.5	59.383	0	3.3842	25492000	12	21.1838	NaN	20.7858	NaN	NaN	20.8886	NaN	21.1611	-0.040041	0.0538409
Cytosolic Fe-S cluster assembly factor NUBP2	NUBP2	Q9Y5Y2;B7Z6P0;H3BQR2;H3BNF0;H3BNS4	Q9Y5Y2;B7Z6P0;H3BQR2	4 iron, 4 sulfur cluster binding;adenyl nucleotide binding;adenyl ribonucleotide binding;ATP binding;binding;cation binding;ion binding;iron-sulfur cluster binding;metal cluster binding;metal ion binding;nucleotide binding;purine nucleotide binding;purine ribonucleoside triphosphate binding;purine ribonucleotide binding;ribonucleotide binding	AAA_31;ParA	3	3	3	25.1	25.1	25.1	28.825	0	3.99	12271000	9	20.6871	NaN	20.1481	NaN	NaN	20.4444	NaN	NaN	-0.0268555	0
Nuclear migration protein nudC	NUDC	Q9Y266;A0A0A0MSU9;A0A0A0MSS4	Q9Y266		CS;Nudc_N	5	5	5	19	19	19	38.242	0	4.528	60897000	7	21.9336	21.8012	NaN	23.2147	NaN	NaN	21.8332	21.7321	0.533808	0.369115
Ornithine aminotransferase, mitochondrial;Ornithine aminotransferase, hepatic form;Ornithine aminotransferase, renal form	OAT	P04181;P04181-2	P04181;P04181-2	binding;catalytic activity;cofactor binding;ornithine-oxo-acid transaminase activity;pyridoxal phosphate binding;transaminase activity;transferase activity;transferase activity, transferring nitrogenous groups;vitamin B6 binding;vitamin binding	Aminotran_3	7	7	7	28.2	28.2	28.2	48.534	0	15.854	66854000	31	22.3647	21.9523	21.6944	22.9337	NaN	NaN	22.4602	21.9141	0.0491128	0.0379877
Obg-like ATPase 1	OLA1	J3KQ32;Q9NTK5;Q9NTK5-2;Q9NTK5-3;C9JTK6;C9JCJ9	J3KQ32;Q9NTK5;Q9NTK5-2	adenyl nucleotide binding;adenyl ribonucleotide binding;ATP binding;ATPase activity;binding;catalytic activity;cation binding;GTP binding;guanyl nucleotide binding;guanyl ribonucleotide binding;hydrolase activity;hydrolase activity, acting on acid anhydrides;hydrolase activity, acting on acid anhydrides, in phosphorus-containing anhydrides;ion binding;metal ion binding;nucleoside-triphosphatase a…	MMR_HSR1;YchF-GTPase_C	7	7	7	29.3	29.3	29.3	46.937	0	11.552	25471000	10	22.0072	NaN	NaN	22.4305	21.6213	NaN	NaN	NaN	0.597571	0
Dynamin-like 120 kDa protein, mitochondrial;Dynamin-like 120 kDa protein, form S1	OPA1	E5KLK1;E5KLJ6;E5KLJ9;E5KLJ5;O60313;O60313-2	E5KLK1;E5KLJ6;E5KLJ9;E5KLJ5;O60313;O60313-2	binding;catalytic activity;cation binding;GTP binding;GTPase activity;guanyl nucleotide binding;guanyl ribonucleotide binding;hydrolase activity;hydrolase activity, acting on acid anhydrides;hydrolase activity, acting on acid anhydrides, in phosphorus-containing anhydrides;ion binding;magnesium ion binding;metal ion binding;nucleoside-triphosphatase activity;nucleotide binding;purine nucleotide b…		3	3	3	5.9	5.9	5.9	111.82	0.00080972	2.6739	136280000	14	NaN	NaN	23.3987	22.7059	NaN	23.1642	23.3739	NaN	-0.216731	0.214611
Mitochondrial inner membrane protein OXA1L	OXA1L	C9JC63;E7EVY0;S4R3Q9;J3KNA0;Q15070-3;Q15070-2;Q15070	C9JC63;E7EVY0;S4R3Q9;J3KNA0;Q15070-3;Q15070-2;Q15070	binding;identical protein binding;protein binding;protein dimerization activity;protein homodimerization activity	60KD_IMP	3	3	3	26.8	26.8	26.8	12.728	0	3.5215	34013000	11	NaN	NaN	21.2597	20.7188	20.9098	NaN	21.0897	21.0342	-0.0219593	0.0341509
Protein disulfide-isomerase	P4HB	P07237;H7BZ94;H0Y3Z3;I3L398;I3L312;I3L3P5;I3L4M2;I3L3U6;I3L0S0;I3NI03;I3L1Y5;I3L514	P07237;H7BZ94;H0Y3Z3	catalytic activity;endopeptidase activity;hydrolase activity;intramolecular oxidoreductase activity;intramolecular oxidoreductase activity, interconverting keto- and enol-groups;intramolecular oxidoreductase activity, transposing S-S bonds;isomerase activity;oxidoreductase activity;oxidoreductase activity, acting on paired donors, with incorporation or reduction of molecular oxygen;oxidoreductase…	Thioredoxin	20	20	20	55.5	55.5	55.5	57.116	0	63.838	229220000	66	24.111	22.1767	23.4694	25.4908	23.309	21.8105	23.2158	23.0863	0.956565	0.580985
Proliferation-associated protein 2G4	PA2G4	Q9UQ80;Q9UQ80-2;F8VR77;F8W0A3;H0YIN7	Q9UQ80;Q9UQ80-2;F8VR77	binding;catalytic activity;DNA binding;enzyme binding;hydrolase activity;nucleic acid binding;nucleic acid binding transcription factor activity;protein binding;sequence-specific DNA binding transcription factor activity;ubiquitin protein ligase binding	Peptidase_M24	13	13	13	41.4	41.4	41.4	43.786	0	20.17	75513000	28	22.9453	NaN	NaN	24.1155	22.7365	NaN	22.2929	22.1423	1.13985	0.983372
Polyadenylate-binding protein;Polyadenylate-binding protein 1;Polyadenylate-binding protein 4	PABPC1;PABPC4	A0A087WTT1;E7EQV3;P11940-2;P11940;E7ERJ7;H0YAR2;E5RGH3;H0YBN4;B1ANR0;Q13310-2;Q13310;Q13310-3;E5RJB9;B1ANR1;H0YB86;H0Y5F5;Q9H361;E5RHG7;H0YEQ8;E5RH24;H0YAP2;H0YEU6;Q4VXU2	A0A087WTT1;E7EQV3;P11940-2;P11940;E7ERJ7;H0YAR2;E5RGH3;H0YBN4;B1ANR0;Q13310-2;Q13310;Q13310-3	binding;mRNA binding;nucleic acid binding;nucleotide binding;poly(A) RNA binding;poly(U) RNA binding;poly-purine tract binding;poly-pyrimidine tract binding;protein binding;protein C-terminus binding;RNA binding;single-stranded RNA binding;translation activator activity;translation regulator activity;translation regulator activity, nucleic acid binding	PABP;RRM_1	6	6	6	16.7	16.7	16.7	58.535	0	15.384	66602000	41	22.4123	21.8611	20.8683	22.8967	22.0666	NaN	22.0364	21.6275	0.0994433	0.066439
Multifunctional protein ADE2;Phosphoribosylaminoimidazole-succinocarboxamide synthase;Phosphoribosylaminoimidazole carboxylase	PAICS	P22234;E9PBS1;P22234-2;D6RF62	P22234;E9PBS1;P22234-2;D6RF62	acid-amino acid ligase activity;adenyl nucleotide binding;adenyl ribonucleotide binding;ATP binding;binding;carbon-carbon lyase activity;carboxy-lyase activity;catalytic activity;identical protein binding;ligase activity;ligase activity, forming carbon-nitrogen bonds;lyase activity;nucleotide binding;phosphoribosylaminoimidazole carboxylase activity;phosphoribosylaminoimidazolesuccinocarboxamide …	AIRC;SAICAR_synt	12	12	12	31.3	31.3	31.3	47.079	0	22.432	151750000	57	23.5538	22.7906	22.9488	24.0647	23.093	23.3935	23.1344	22.7196	0.254372	0.335551
Serine/threonine-protein kinase PAK 4	PAK4	O96013;O96013-4;O96013-2;O96013-3;M0R2X4;M0R0L9;M0R1R1;M0R3G6;Q9P286;Q9NQU5-2;Q9NQU5	O96013;O96013-4;O96013-2;O96013-3	adenyl nucleotide binding;adenyl ribonucleotide binding;ATP binding;binding;catalytic activity;enzyme binding;GTPase binding;kinase activity;nucleotide binding;phosphotransferase activity, alcohol group as acceptor;protein binding;protein kinase activity;protein serine/threonine kinase activity;purine nucleotide binding;purine ribonucleoside triphosphate binding;purine ribonucleotide binding;Rac …	PBD;Pkinase	49	49	49	75.3	75.3	75.3	64.071	0	323.31	13101000000	1087	29.542	29.6883	29.6301	29.4633	29.3584	29.6028	29.2886	29.5055	0.14213	0.820526
Protein deglycase DJ-1	PARK7	Q99497;K7ELW0;K7EN27	Q99497;K7ELW0;K7EN27	androgen receptor binding;binding;catalytic activity;cation binding;copper chaperone activity;copper ion binding;cytokine binding;enzyme binding;glyoxalase III activity;hormone receptor binding;hydrolase activity;identical protein binding;ion binding;kinase binding;mercury ion binding;metal ion binding;metallochaperone activity;mRNA binding;nuclear hormone receptor binding;nucleic acid binding;ox…	DJ-1_PfpI	6	6	6	59.3	59.3	59.3	19.891	0	24.54	186600000	65	23.629	23.2055	23.3359	24.2711	23.5208	22.593	22.9755	23.1358	0.554094	0.922287
Poly [ADP-ribose] polymerase 1	PARP1	P09874;Q5VX84;Q5VX85	P09874	binding;catalytic activity;cation binding;coenzyme binding;cofactor binding;DNA binding;enzyme binding;identical protein binding;ion binding;kinase binding;metal ion binding;NAD binding;NAD+ ADP-ribosyltransferase activity;nucleic acid binding;nucleotide binding;protein binding;protein kinase binding;protein N-terminus binding;transcription factor binding;transferase activity;transferase activity…	BRCT;PADR1;PARP;PARP_reg;WGR;zf-PARP	45	45	45	60.2	60.2	60.2	113.08	0	160.29	1810100000	425	26.5296	26.271	26.3147	26.8412	26.1557	27.313	26.9874	26.7554	-0.313756	0.522633
Poly(rC)-binding protein 1	PCBP1	Q15365	Q15365	binding;DNA binding;nucleic acid binding;RNA binding;single-stranded DNA binding;structure-specific DNA binding	KH_1	16	16	11	71.6	71.6	57.6	37.497	0	155.76	459310000	188	24.6521	24.5877	24.4858	25.3194	24.7514	24.6059	24.6714	24.6064	0.102512	0.212453
Poly(rC)-binding protein 2	PCBP2	F8VZX2;Q15366-4;Q15366-5;Q15366-3;Q15366-2;Q15366-6;Q15366;H3BRU6;Q15366-7;Q15366-8;F8W0G4;F8VXH9;F8W1G6;J3QT27;E9PFP8;P57721-2;P57721-3;P57721-5;P57721-4;P57721;F8VRH0;H3BND9;F8VTZ0;H3BSP4;H3BSS4	F8VZX2;Q15366-4;Q15366-5;Q15366-3;Q15366-2;Q15366-6;Q15366;H3BRU6;Q15366-7;Q15366-8;F8W0G4;F8VXH9	binding;DNA binding;enzyme binding;nucleic acid binding;protein binding;RNA binding;ubiquitin protein ligase binding	KH_1	15	10	10	70.1	57.9	57.9	33.8	0	123.43	461040000	197	24.7712	24.6737	24.4855	25.2926	24.7685	24.5133	24.8324	24.6444	0.1161	0.254329
Polycomb group RING finger protein 3	PCGF3	Q3KNV8;Q3KNV8-2;C9J3G7;C9JYD0;C9JGV3	Q3KNV8;Q3KNV8-2;C9J3G7	binding;cation binding;ion binding;metal ion binding;transition metal ion binding;zinc ion binding	zf-C3HC4	8	8	8	41.7	41.7	41.7	28.115	0	23.15	155440000	42	23.4555	23.7587	23.4405	23.2525	23.6193	23.6081	22.9196	23.558	0.0505457	0.0925306
Polycomb group RING finger protein 5	PCGF5	Q86SE9;Q86SE9-2	Q86SE9	binding;cation binding;ion binding;metal ion binding;transition metal ion binding;zinc ion binding	zf-C3HC4	4	4	4	21.9	21.9	21.9	29.714	0	15.03	89659000	38	22.3741	22.6604	22.6288	22.4825	22.677	21.8094	23.1992	22.931	-0.117704	0.14519
Protein-L-isoaspartate O-methyltransferase;Protein-L-isoaspartate(D-aspartate) O-methyltransferase	PCMT1	A0A0A0MRJ6;H7BY58;P22061;P22061-2;F6S8N6;C9J0F2;F8WDT3;F8WAV5;F8WAX2	A0A0A0MRJ6;H7BY58;P22061;P22061-2;F6S8N6	carboxyl-O-methyltransferase activity;catalytic activity;methyltransferase activity;O-methyltransferase activity;protein carboxyl O-methyltransferase activity;protein methyltransferase activity;protein-L-isoaspartate (D-aspartate) O-methyltransferase activity;S-adenosylmethionine-dependent methyltransferase activity;transferase activity;transferase activity, transferring one-carbon groups	PCMT	5	5	5	32.3	32.3	32.3	30.315	0	13.118	97292000	26	22.8772	22.9854	22.5897	23.405	22.4451	22.1462	22.272	22.2838	0.677545	2.03194
Proliferating cell nuclear antigen	PCNA	P12004	P12004	binding;catalytic activity;chromatin binding;damaged DNA binding;dinucleotide insertion or deletion binding;DNA binding;DNA insertion or deletion binding;DNA N-glycosylase activity;DNA polymerase binding;DNA polymerase processivity factor activity;double-stranded DNA binding;enzyme binding;enzyme regulator activity;histone acetyltransferase binding;hydrolase activity;hydrolase activity, acting on…	PCNA_C;PCNA_N	13	13	13	86.2	86.2	86.2	28.768	0	86.696	381110000	107	24.7369	24.3371	24.2348	25.2154	24.6199	24.2731	24.7109	24.3002	0.155037	0.254596
Programmed cell death protein 10	PDCD10	Q9BUL8;C9J363;H7C5M9;C9JSA3;C9JND6;C9J6F3;C9J5C3;C9J932	Q9BUL8;C9J363;H7C5M9;C9JSA3;C9JND6;C9J6F3;C9J5C3	binding;enzyme binding;identical protein binding;kinase binding;protein binding;protein dimerization activity;protein homodimerization activity;protein kinase binding;protein N-terminus binding	DUF1241	5	5	5	33.5	33.5	33.5	24.701	0	21.604	30647000	22	21.4711	NaN	NaN	21.2121	21.7391	NaN	21.3752	21.7901	-0.293258	0.641363
Programmed cell death 6-interacting protein	PDCD6IP	Q8WUM4;Q8WUM4-2	Q8WUM4;Q8WUM4-2	binding;calcium-dependent protein binding;G-protein-coupled receptor binding;identical protein binding;protein binding;protein dimerization activity;protein homodimerization activity;proteinase activated receptor binding;receptor binding	ALIX_LYPXL_bnd;BRO1	3	3	3	4.6	4.6	4.6	96.022	0.00078493	2.4143	21967000	4	NaN	21.2117	NaN	21.5703	NaN	NaN	21.1877	NaN	0.203235	0
Pyruvate dehydrogenase E1 component subunit beta, mitochondrial	PDHB	P11177-3;P11177-2;P11177;C9J634;F8WF02	P11177-3;P11177-2;P11177;C9J634	catalytic activity;oxidoreductase activity;oxidoreductase activity, acting on the aldehyde or oxo group of donors;oxidoreductase activity, acting on the aldehyde or oxo group of donors, disulfide as acceptor;pyruvate dehydrogenase (acetyl-transferring) activity;pyruvate dehydrogenase activity	Transket_pyr;Transketolase_C	7	7	7	30.8	30.8	30.8	37.514	0	10.92	39305000	15	21.7213	NaN	NaN	21.4945	21.811	NaN	NaN	NaN	-0.203065	0
Protein disulfide-isomerase A3	PDIA3	P30101	P30101	catalytic activity;cysteine-type endopeptidase activity;cysteine-type peptidase activity;disulfide oxidoreductase activity;endopeptidase activity;hydrolase activity;hydrolase activity, acting on ester bonds;intramolecular oxidoreductase activity;intramolecular oxidoreductase activity, interconverting keto- and enol-groups;intramolecular oxidoreductase activity, transposing S-S bonds;isomerase act…	Thioredoxin	11	11	9	32.7	32.7	27.5	56.782	0	39.348	136990000	47	23.5162	21.4976	22.3415	25.1573	22.26	22.2703	23.3305	21.5524	0.77483	0.388026
Protein disulfide-isomerase A4	PDIA4	P13667	P13667	catalytic activity;intramolecular oxidoreductase activity;intramolecular oxidoreductase activity, interconverting keto- and enol-groups;intramolecular oxidoreductase activity, transposing S-S bonds;isomerase activity;protein disulfide isomerase activity	Thioredoxin	11	11	11	27.8	27.8	27.8	72.932	0	14.263	67413000	27	22.7783	21.6158	NaN	23.9289	21.1972	NaN	22.2337	NaN	1.05886	0.463487
Protein disulfide-isomerase A6	PDIA6	Q15084-3;Q15084;Q15084-4;Q15084-5;Q15084-2	Q15084-3;Q15084;Q15084-4;Q15084-5;Q15084-2	catalytic activity;intramolecular oxidoreductase activity;intramolecular oxidoreductase activity, interconverting keto- and enol-groups;intramolecular oxidoreductase activity, transposing S-S bonds;isomerase activity;protein disulfide isomerase activity	Thioredoxin	6	6	6	24.3	24.3	24.3	47.837	0	19.558	51515000	21	22.3003	21.411	21.7552	22.8679	NaN	NaN	21.8724	21.7729	0.260949	0.210873
3-phosphoinositide-dependent protein kinase 1;Putative 3-phosphoinositide-dependent protein kinase 2	PDPK1;PDPK2P	O15530-3;O15530;E9PER6;O15530-5;Q6A1A2;O15530-4;H3BQ10	O15530-3;O15530;E9PER6;O15530-5;Q6A1A2;O15530-4	3-phosphoinositide-dependent protein kinase activity;adenyl nucleotide binding;adenyl ribonucleotide binding;ATP binding;binding;catalytic activity;enzyme activator activity;enzyme binding;enzyme regulator activity;kinase activity;lipase activator activity;nucleotide binding;phospholipase activator activity;phospholipase binding;phosphotransferase activity, alcohol group as acceptor;protein bindi…	Pkinase	14	14	2	41.5	41.5	8.1	60.395	0	33.658	294830000	93	24.2993	24.5551	24.2913	24.0103	24.1854	24.1824	24.2218	24.3588	0.0519032	0.169138
Pyridoxal kinase	PDXK	O00764;F2Z2Y4;O00764-3;O00764-2;A8MV33	O00764;F2Z2Y4;O00764-3;O00764-2	adenyl nucleotide binding;adenyl ribonucleotide binding;alkali metal ion binding;ATP binding;binding;catalytic activity;cation binding;cofactor binding;identical protein binding;ion binding;kinase activity;lithium ion binding;magnesium ion binding;metal ion binding;nucleotide binding;phosphotransferase activity, alcohol group as acceptor;potassium ion binding;protein binding;protein dimerization …	PfkB	46	46	46	96.5	96.5	96.5	35.102	0	323.31	101630000000	2574	32.5153	32.3349	32.3644	32.2619	32.3706	32.3944	32.1416	32.3096	0.0650444	0.36005
Phosphatidylethanolamine-binding protein 1;Hippocampal cholinergic neurostimulating peptide	PEBP1	P30086	P30086	adenyl nucleotide binding;adenyl ribonucleotide binding;ATP binding;binding;endopeptidase inhibitor activity;endopeptidase regulator activity;enzyme binding;enzyme inhibitor activity;enzyme regulator activity;kinase binding;lipid binding;nucleotide binding;peptidase inhibitor activity;peptidase regulator activity;phosphatidylethanolamine binding;phospholipid binding;protein binding;protein kinase…	PBP	8	8	8	69.5	69.5	69.5	21.057	0	11.662	113670000	20	23.7992	21.4334	NaN	24.9276	NaN	21.4129	22.8694	22.164	1.23796	0.484102
ATP-dependent 6-phosphofructokinase, platelet type	PFKP	Q01813;Q01813-2;H0Y3Y3;V9GYV7;Q5VSR5;B1APP6	Q01813;Q01813-2;H0Y3Y3	6-phosphofructokinase activity;adenyl nucleotide binding;adenyl ribonucleotide binding;ATP binding;binding;carbohydrate kinase activity;catalytic activity;cation binding;ion binding;kinase activity;metal ion binding;nucleotide binding;phosphofructokinase activity;phosphotransferase activity, alcohol group as acceptor;protein binding;protein complex binding;purine nucleotide binding;purine ribonuc…	PFK	4	4	3	8.2	8.2	5.7	85.595	0	11.974	40937000	25	21.7734	21.9552	NaN	NaN	NaN	NaN	21.9816	NaN	-0.117248	0
Profilin-1	PFN1	P07737;K7EJ44;CON__P02584;I3L3D5	P07737;K7EJ44	actin binding;actin monomer binding;adenyl nucleotide binding;adenyl-nucleotide exchange factor activity;ATPase regulator activity;binding;cytoskeletal protein binding;enzyme regulator activity;lipid binding;nucleoside-triphosphatase regulator activity;nucleotide binding;phosphatidylinositol binding;phosphatidylinositol-4,5-bisphosphate binding;phospholipid binding;proline-rich region binding;pro…	Profilin	14	14	14	95	95	95	15.054	0	48.133	613370000	96	25.7552	24.614	24.3084	26.9722	25.1237	23.5416	25.1857	24.4537	0.836246	0.541275
Profilin-2	PFN2	P35080;C9J712	P35080;C9J712	actin binding;actin monomer binding;adenyl nucleotide binding;adenyl-nucleotide exchange factor activity;ATPase regulator activity;binding;cytoskeletal protein binding;enzyme regulator activity;lipid binding;nucleoside-triphosphatase regulator activity;nucleotide binding;phosphatidylinositol binding;phosphatidylinositol-4,5-bisphosphate binding;phospholipid binding;protein binding;purine nucleoti…	Profilin	5	5	2	60.7	60.7	12.9	15.046	0	10.5	202400000	27	23.425	23.7068	23.5058	NaN	23.5265	23.2338	23.8586	23.6443	-0.0199305	0.040533
Phosphoglycerate mutase 1;Probable phosphoglycerate mutase 4	PGAM1;PGAM4	P18669;Q8N0Y7;P15259	P18669;Q8N0Y7	2,3-bisphosphoglycerate-dependent phosphoglycerate mutase activity;binding;bisphosphoglycerate 2-phosphatase activity;bisphosphoglycerate mutase activity;bisphosphoglycerate phosphatase activity;catalytic activity;cofactor binding;enzyme binding;hydrolase activity;hydrolase activity, acting on ester bonds;intramolecular transferase activity;intramolecular transferase activity, phosphotransferases…	His_Phos_1	12	12	12	60.2	60.2	60.2	28.804	0	206.51	408850000	72	24.9966	23.3276	23.8567	26.3671	24.4102	NaN	24.5096	23.8241	0.389029	0.18442
Serine/threonine-protein phosphatase PGAM5, mitochondrial	PGAM5	Q96HS1-2;Q96HS1;F5GXG4	Q96HS1-2;Q96HS1	binding;catalytic activity;enzyme activator activity;enzyme regulator activity;GTPase activator activity;GTPase regulator activity;hydrolase activity;hydrolase activity, acting on ester bonds;molecular transducer activity;nucleoside-triphosphatase regulator activity;phosphatase activity;phosphoprotein phosphatase activity;phosphoric ester hydrolase activity;protein binding;protein complex binding…	His_Phos_1	5	5	5	34.9	34.9	34.9	28.02	0	60.542	210650000	67	23.7023	23.6322	23.7935	23.3945	23.764	23.9712	23.7269	23.9029	-0.210601	1.06183
Phosphoglycerate kinase 1	PGK1	P00558;P00558-2;P07205	P00558;P00558-2	adenyl nucleotide binding;adenyl ribonucleotide binding;ATP binding;binding;catalytic activity;kinase activity;nucleotide binding;phosphoglycerate kinase activity;phosphotransferase activity, carboxyl group as acceptor;purine nucleotide binding;purine ribonucleoside triphosphate binding;purine ribonucleotide binding;ribonucleotide binding;transferase activity;transferase activity, transferring ph…	PGK	21	21	21	68.8	68.8	68.8	44.614	0	95.197	438280000	128	25.4417	23.4811	24.0002	26.7027	24.5274	23.2571	24.8173	24.0709	0.738237	0.40463
Prohibitin	PHB	P35232;C9JW96;E9PCW0;E7ESE2;C9JZ20;P35232-2;D6RBK0	P35232;C9JW96;E9PCW0;E7ESE2;C9JZ20	binding;complement binding;complement component C3a binding;complement component C3b binding;DNA binding;enzyme binding;G-protein-coupled receptor binding;histone deacetylase binding;nucleic acid binding;nucleic acid binding transcription factor activity;opsonin binding;protein binding;proteinase activated receptor binding;receptor binding;regulatory region DNA binding;regulatory region nucleic a…	Band_7	58	58	58	99.6	99.6	99.6	29.804	0	323.31	746590000000	8256	35.2304	35.0407	35.287	34.8769	35.5212	35.2635	35.3688	35.309	-0.256869	1.24638
Prohibitin-2	PHB2	Q99623;J3KPX7;F5GY37;Q99623-2;F5GWA7;F5H3X6;F5H0C5;F5H2D2;U3KPZ5	Q99623;J3KPX7;F5GY37;Q99623-2;F5GWA7;F5H3X6	binding;estrogen receptor binding;hormone receptor binding;nuclear hormone receptor binding;protein binding;protein N-terminus binding;receptor binding;steroid hormone receptor binding	Band_7	60	60	60	96	96	96	33.296	0	323.31	757320000000	9719	35.2484	35.1037	35.2901	34.9392	35.4761	35.3128	35.4163	35.3491	-0.243247	1.49783
D-3-phosphoglycerate dehydrogenase	PHGDH	O43175;Q5SZU1	O43175;Q5SZU1	binding;catalytic activity;coenzyme binding;cofactor binding;electron carrier activity;NAD binding;nucleotide binding;oxidoreductase activity;oxidoreductase activity, acting on CH-OH group of donors;oxidoreductase activity, acting on the CH-OH group of donors, NAD or NADP as acceptor;phosphoglycerate dehydrogenase activity	2-Hacid_dh;2-Hacid_dh_C	29	29	29	56.8	56.8	56.8	56.65	0	131.47	2104400000	377	26.8277	26.8606	26.8288	26.9534	27.2146	26.7433	27.061	26.9838	-0.133017	0.615117
Phosphorylase b kinase regulatory subunit alpha, skeletal muscle isoform	PHKA1	A6NMN0;P46020-2;P46020;A6NIT2;P46020-3	A6NMN0;P46020-2;P46020;A6NIT2;P46020-3	calmodulin-dependent protein kinase activity;catalytic activity;hydrolase activity;hydrolase activity, acting on glycosyl bonds;hydrolase activity, hydrolyzing O-glycosyl compounds;kinase activity;phosphorylase kinase activity;phosphotransferase activity, alcohol group as acceptor;protein kinase activity;protein serine/threonine kinase activity;transferase activity;transferase activity, transferr…	Glyco_hydro_15	14	14	14	21	21	21	139.05	0	48.885	172670000	57	23.2256	23.5363	23.7205	23.0973	23.756	23.8923	23.7748	23.5299	-0.343329	1.11184
Phosphorylase b kinase regulatory subunit alpha, liver isoform	PHKA2	P46019	P46019	calmodulin-dependent protein kinase activity;catalytic activity;hydrolase activity;hydrolase activity, acting on glycosyl bonds;hydrolase activity, hydrolyzing O-glycosyl compounds;kinase activity;phosphorylase kinase activity;phosphotransferase activity, alcohol group as acceptor;protein kinase activity;protein serine/threonine kinase activity;transferase activity;transferase activity, transferr…	Glyco_hydro_15	13	13	13	18.5	18.5	18.5	138.41	0	88.587	405720000	136	24.6525	24.4997	24.5542	24.2635	24.2512	24.7823	24.6774	24.7209	-0.115479	0.337042
Phosphorylase b kinase regulatory subunit beta	PHKB	Q93100-4;Q93100-2;H3BV13;H3BQ89;I3L213;I3L3F2;I3NHZ9;I3L0Z1	Q93100-4;Q93100-2	calmodulin-dependent protein kinase activity;catalytic activity;hydrolase activity;hydrolase activity, acting on glycosyl bonds;hydrolase activity, hydrolyzing O-glycosyl compounds;kinase activity;phosphorylase kinase activity;phosphotransferase activity, alcohol group as acceptor;protein kinase activity;protein serine/threonine kinase activity;transferase activity;transferase activity, transferr…	Glyco_hydro_15	18	18	1	27.3	27.3	1.5	123.82	0	51.569	441800000	123	24.6761	24.896	24.6653	24.206	24.8966	24.8873	25.031	24.8803	-0.312965	1.09108
Phosphorylase b kinase gamma catalytic chain, liver/testis isoform	PHKG2	J3KNN3;P15735;P15735-2;H3BP07;H3BTW6;H3BN16	J3KNN3;P15735;P15735-2	adenyl nucleotide binding;adenyl ribonucleotide binding;ATP binding;binding;calmodulin-dependent protein kinase activity;catalytic activity;kinase activity;nucleotide binding;phosphorylase kinase activity;phosphotransferase activity, alcohol group as acceptor;protein kinase activity;protein serine/threonine kinase activity;purine nucleotide binding;purine ribonucleoside triphosphate binding;purin…	Pkinase	9	9	9	33.7	33.7	33.7	46.886	0	17.186	430740000	75	24.7701	25.0398	24.9178	24.5292	24.7189	24.7024	24.9103	25.0065	-0.0203123	0.0539098
14 kDa phosphohistidine phosphatase	PHPT1	Q9NRX4;Q9NRX4-2	Q9NRX4;Q9NRX4-2	binding;calcium channel inhibitor activity;calcium channel regulator activity;catalytic activity;channel inhibitor activity;channel regulator activity;hydrolase activity;hydrolase activity, acting on ester bonds;ion channel binding;ion channel inhibitor activity;phosphatase activity;phosphohistidine phosphatase activity;phosphoprotein phosphatase activity;phosphoric ester hydrolase activity;prote…	Ocnus	2	2	2	28	28	28	13.832	0.00079808	2.5773	8104200	2	20.9965	NaN	NaN	21.6998	NaN	NaN	NaN	NaN	NaN	0
Phosphatidylinositol 5-phosphate 4-kinase type-2 gamma	PIP4K2C	Q8TBX8-3;Q8TBX8;Q8TBX8-2;H0YIJ6;F8VNT5;F8VU68;F8VVB2	Q8TBX8-3;Q8TBX8;Q8TBX8-2	1-phosphatidylinositol-5-phosphate 4-kinase activity;adenyl nucleotide binding;adenyl ribonucleotide binding;ATP binding;binding;catalytic activity;identical protein binding;inositol or phosphatidylinositol kinase activity;kinase activity;lipid kinase activity;nucleotide binding;phosphatidylinositol phosphate kinase activity;phosphotransferase activity, alcohol group as acceptor;protein binding;p…	PIP5K	16	16	16	55.1	55.1	55.1	45.053	0	61.792	721740000	153	25.3771	25.5333	25.4695	24.9902	25.5633	25.2933	25.349	25.4179	-0.0633411	0.18344
Mitogen-activated protein kinase kinase kinase MLT	pk;ZAK	D4Q8H0;Q9NYL2-2;Q9NYL2;Q9NYL2-3;C9J3F7	D4Q8H0;Q9NYL2-2;Q9NYL2;Q9NYL2-3	adenyl nucleotide binding;adenyl ribonucleotide binding;ATP binding;binding;catalytic activity;cation binding;ion binding;kinase activity;magnesium ion binding;MAP kinase kinase kinase activity;metal ion binding;molecular transducer activity;nucleotide binding;phosphotransferase activity, alcohol group as acceptor;protein kinase activity;protein serine/threonine kinase activity;purine nucleotide …	Pkinase_Tyr;SAM_1	15	15	15	40.4	40.4	40.4	51.582	0	51.04	331790000	120	24.2528	24.3824	24.2087	23.9032	24.517	24.1489	24.14	24.4149	-0.118375	0.36924
Pyruvate kinase PKM;Pyruvate kinase	PKM	P14618;P14618-2;P14618-3;B4DNK4;H3BTN5;H3BQ34;H3BR70;H3BT25;H3BUW1;H3BTJ2;H3BU13;H3BN34;H3BQZ3;P30613-2;P30613	P14618;P14618-2;P14618-3;B4DNK4;H3BTN5;H3BQ34;H3BR70	adenyl nucleotide binding;adenyl ribonucleotide binding;alkali metal ion binding;antigen binding;ATP binding;binding;catalytic activity;cation binding;ion binding;kinase activity;magnesium ion binding;metal ion binding;MHC class II protein complex binding;MHC protein complex binding;nucleotide binding;phosphotransferase activity, alcohol group as acceptor;potassium ion binding;purine nucleotide b…	PK;PK_C	29	29	29	71.4	71.4	71.4	57.936	0	139.88	1154700000	177	26.6217	25.5939	25.5941	27.5579	25.9714	25.1555	25.9448	25.5651	0.682703	0.640308
Membrane-associated tyrosine- and threonine-specific cdc2-inhibitory kinase	PKMYT1	Q99640-3;Q99640;I3L1H7;I3L4K3;I3L3P0;I3L136;A6NHV6;B4DZM6;Q99640-4;Q99640-2	Q99640-3;Q99640;I3L1H7;I3L4K3;I3L3P0;I3L136;A6NHV6;B4DZM6;Q99640-4;Q99640-2	adenyl nucleotide binding;adenyl ribonucleotide binding;ATP binding;binding;catalytic activity;cation binding;ion binding;kinase activity;metal ion binding;nucleotide binding;phosphotransferase activity, alcohol group as acceptor;protein kinase activity;protein serine/threonine kinase activity;purine nucleotide binding;purine ribonucleoside triphosphate binding;purine ribonucleotide binding;ribon…	Pkinase	3	3	3	8	8	8	53.542	0	3.3616	45273000	23	21.628	21.6179	21.5165	21.7581	21.9062	NaN	21.4801	21.8532	-0.116395	0.398082
Serine/threonine-protein kinase N1	PKN1	Q16512;Q16512-2;Q16512-3;K7EKY9;K7EM57;K7EN76;K7EL10	Q16512;Q16512-2;Q16512-3	adenyl nucleotide binding;adenyl ribonucleotide binding;androgen receptor binding;ATP binding;binding;catalytic activity;chromatin binding;enzyme binding;GTPase binding;GTP-Rho binding;histone binding;histone deacetylase binding;histone kinase activity;histone kinase activity (H3-T11 specific);histone threonine kinase activity;hormone receptor binding;kinase activity;kinase binding;ligand-depende…	HR1;Pkinase;Pkinase_C	12	12	12	24.5	24.5	24.5	103.93	0	41.867	216480000	85	23.5262	23.8974	23.8909	23.563	23.9425	23.5595	23.6328	23.7535	-0.00268555	0.00685318
Plectin	PLEC	Q15149-7;Q15149-8;Q15149-9;Q15149-5;Q15149-4;Q15149-6;Q15149-3;Q15149-2;Q15149;E9PMV1;E9PQ28;E9PIA2;E9PKG0;H0YDN1	Q15149-7;Q15149-8;Q15149-9;Q15149-5;Q15149-4;Q15149-6;Q15149-3;Q15149-2;Q15149	ankyrin binding;binding;cytoskeletal protein binding;protein binding;structural constituent of muscle;structural molecule activity	CH;Plectin;S10_plectin	77	77	74	29	29	27.6	512.6	0	316.73	976230000	363	24.7853	25.3033	25.4239	25.3917	24.6911	26.7739	25.1963	25.6576	-0.35366	0.319632
Plasminogen receptor (KT)	PLGRKT	Q9HBL7	Q9HBL7		DUF2368	11	11	11	66.7	66.7	66.7	17.201	0	18.763	660660000	108	25.0383	25.5126	25.661	25.0107	25.4846	25.1084	25.4988	25.3396	-0.0522227	0.101836
Perilipin-3	PLIN3	O60664-4;O60664-3;O60664;K7ERZ3;O60664-2;K7EL96;K7ER39	O60664-4;O60664-3;O60664;K7ERZ3;O60664-2		Perilipin	6	6	6	19.4	19.4	19.4	45.803	0	23.36	22352000	15	22.0229	NaN	NaN	22.4847	NaN	NaN	NaN	NaN	NaN	0
Serine/threonine-protein kinase PLK1	PLK1	P53350;I3L387;I3L309;I3L2H5	P53350	adenyl nucleotide binding;adenyl ribonucleotide binding;anaphase-promoting complex binding;ATP binding;binding;catalytic activity;cytoskeletal protein binding;enzyme binding;kinase activity;kinase binding;microtubule binding;nucleotide binding;phosphotransferase activity, alcohol group as acceptor;protein binding;protein complex binding;protein kinase activity;protein kinase binding;protein serin…	Pkinase;POLO_box	12	12	12	28.7	28.7	28.7	68.254	0	34.524	161750000	68	23.4826	23.7701	23.7424	22.9302	23.7697	23.5045	23.6487	23.5219	-0.129852	0.260729
Serine/threonine-protein kinase PLK;Serine/threonine-protein kinase PLK4	PLK4	J3KR82;J3KR84;O00444-2;O00444;O00444-3	J3KR82;J3KR84;O00444-2;O00444;O00444-3	adenyl nucleotide binding;adenyl ribonucleotide binding;ATP binding;binding;catalytic activity;kinase activity;nucleotide binding;phosphotransferase activity, alcohol group as acceptor;protein kinase activity;protein serine/threonine kinase activity;purine nucleotide binding;purine ribonucleoside triphosphate binding;purine ribonucleotide binding;ribonucleotide binding;transferase activity;transf…	Pkinase;POLO_box	3	3	3	5.5	5.5	5.5	100.11	0	7.5522	46344000	17	22.0219	NaN	21.7781	21.7013	NaN	NaN	NaN	21.7651	0.0686042	0
Plastin-3	PLS3	A0A0A0MSQ0;P13797-3;P13797-2;P13797;U3KQI3;H7C4N2;Q5TBN3;P13796	A0A0A0MSQ0;P13797-3;P13797-2;P13797	actin binding;actin filament binding;binding;calcium ion binding;cation binding;cytoskeletal protein binding;enzyme binding;GTPase binding;ion binding;metal ion binding;protein binding	CH;EF-hand_1;EF-hand_7	7	7	7	19.3	19.3	19.3	69.334	0	15.598	64824000	20	22.2199	21.5191	NaN	23.0787	21.5448	NaN	22.0321	NaN	0.484098	0.313952
Polymerase delta-interacting protein 3	POLDIP3	F6VRR5;Q9BY77-2;Q9BY77;Q8WUT1;F8WCX5;Q6R954;F8WEE2	F6VRR5;Q9BY77-2;Q9BY77;Q8WUT1;F8WCX5	binding;nucleic acid binding;nucleotide binding	RRM_1	9	9	9	31.5	31.5	31.5	48.103	0	16.014	57088000	34	NaN	23.7757	21.6117	21.0983	NaN	21.4741	21.5985	NaN	0.62561	0.224304
Inorganic pyrophosphatase	PPA1	Q15181;Q5SQT6	Q15181;Q5SQT6	binding;catalytic activity;cation binding;hydrolase activity;hydrolase activity, acting on acid anhydrides;hydrolase activity, acting on acid anhydrides, in phosphorus-containing anhydrides;inorganic diphosphatase activity;ion binding;magnesium ion binding;metal ion binding;pyrophosphatase activity	Pyrophosphatase	3	3	3	22.1	22.1	22.1	32.66	0	20.852	32541000	7	22.3198	NaN	NaN	23.3246	NaN	NaN	NaN	NaN	NaN	0
Peptidyl-prolyl cis-trans isomerase A;Peptidyl-prolyl cis-trans isomerase A, N-terminally processed;Peptidyl-prolyl cis-trans isomerase	PPIA	P62937;F8WE65;C9J5S7;P62937-2;E5RIZ5;A0A0B4J2A2;A0A075B767;A0A075B759;Q9Y536;F5H284;A2BFH1	P62937;F8WE65;C9J5S7	binding;catalytic activity;cis-trans isomerase activity;isomerase activity;peptide binding;peptidyl-prolyl cis-trans isomerase activity;protein binding;unfolded protein binding;virion binding	Pro_isomerase	13	13	13	79.4	79.4	79.4	18.012	0	89.613	1937000000	312	27.1708	26.1026	26.3155	28.3601	26.6649	26.0948	26.8381	26.2719	0.51981	0.427912
Peptidyl-prolyl cis-trans isomerase B	PPIB	P23284	P23284	binding;catalytic activity;cis-trans isomerase activity;enzyme binding;isomerase activity;peptide binding;peptidyl-prolyl cis-trans isomerase activity;protein binding;protein complex binding;RNA polymerase binding;unfolded protein binding	Pro_isomerase	5	5	5	20.8	20.8	20.8	23.742	0	7.2998	113570000	43	22.2829	22.2792	21.9031	23.9372	22.2736	NaN	22.9808	22.0108	0.178898	0.111357
Serine/threonine-protein phosphatase 2A 65 kDa regulatory subunit A alpha isoform	PPP2R1A	P30153;C9J9C1;B3KQV6;E9PH38;P30154-4;P30154;P30154-2;M0QXG4;M0R0K6;E9PPI5;E9PNM7;E9PHZ6;P30154-5;P30154-3	P30153;C9J9C1;B3KQV6	antigen binding;binding;catalytic activity;enzyme regulator activity;hydrolase activity;hydrolase activity, acting on ester bonds;phosphatase activity;phosphatase regulator activity;phosphoprotein phosphatase activity;phosphoric ester hydrolase activity;protein binding;protein dimerization activity;protein heterodimerization activity;protein phosphatase regulator activity;protein phosphatase type…	HEAT	11	11	11	26.7	26.7	26.7	65.308	0	18.552	166760000	69	23.5962	23.533	23.5479	23.806	23.4072	23.0392	23.2534	23.1265	0.414216	2.17804
Serine/threonine-protein phosphatase 2A 55 kDa regulatory subunit B alpha isoform	PPP2R2A	P63151;P63151-2;E5RFR9;Q66LE6;E5RHQ2;E5RJV2;E5RIY1;Q9Y2T4-3;Q00005-6;Q9Y2T4-4;Q00005;Q00005-2;Q9Y2T4-2;Q9Y2T4;Q00005-3;Q00005-4;Q00005-5;Q00005-7	P63151;P63151-2;E5RFR9	catalytic activity;enzyme regulator activity;hydrolase activity;hydrolase activity, acting on ester bonds;phosphatase activity;phosphatase regulator activity;phosphoprotein phosphatase activity;phosphoric ester hydrolase activity;protein phosphatase regulator activity;protein phosphatase type 2A regulator activity;protein serine/threonine phosphatase activity		8	8	8	23.3	23.3	23.3	51.691	0	13.707	89261000	28	22.3688	22.4655	NaN	22.0934	22.8125	22.2974	22.3486	22.5565	-0.194556	0.527546
Serine/threonine-protein phosphatase 6 catalytic subunit;Serine/threonine-protein phosphatase 6 catalytic subunit, N-terminally processed	PPP6C	O00743-2;O00743;O00743-3;Q5T1S7	O00743-2;O00743;O00743-3	binding;catalytic activity;cation binding;hydrolase activity;hydrolase activity, acting on ester bonds;ion binding;metal ion binding;phosphatase activity;phosphoprotein phosphatase activity;phosphoric ester hydrolase activity;protein serine/threonine phosphatase activity	Metallophos	4	4	4	26.9	26.9	26.9	32.532	0	11.95	55434000	47	21.8005	NaN	NaN	21.665	22.295	22.2098	21.8629	22.1162	-0.388241	1.24693
Peroxiredoxin-1	PRDX1	Q06830;A0A0A0MSI0;A0A0A0MRQ5;H7C3T4;Q13162	Q06830;A0A0A0MSI0	antioxidant activity;binding;catalytic activity;cation binding;heme binding;ion binding;iron ion binding;metal ion binding;oxidoreductase activity;oxidoreductase activity, acting on paired donors, with incorporation or reduction of molecular oxygen;oxidoreductase activity, acting on peroxide as acceptor;peroxidase activity;peroxiredoxin activity;tetrapyrrole binding;thioredoxin peroxidase activit…	1-cysPrx_C;AhpC-TSA	29	29	28	92	92	92	22.11	0	142.26	4062200000	511	27.9146	27.9679	27.9112	28.1195	27.9508	27.7026	27.8646	27.8384	0.139201	1.01158
Peroxiredoxin-2	PRDX2	P32119;A6NIW5;P32119-2	P32119;A6NIW5	antioxidant activity;catalytic activity;oxidoreductase activity;oxidoreductase activity, acting on paired donors, with incorporation or reduction of molecular oxygen;oxidoreductase activity, acting on peroxide as acceptor;peroxidase activity;peroxiredoxin activity;thioredoxin peroxidase activity	1-cysPrx_C;AhpC-TSA	16	15	15	87.9	87.9	87.9	21.892	0	52.179	343440000	126	24.4648	24.1671	24.2622	24.4819	24.2921	24.1024	24.3578	24.3524	0.0678191	0.28947
Thioredoxin-dependent peroxide reductase, mitochondrial	PRDX3	P30048-2;P30048	P30048-2;P30048	alkyl hydroperoxide reductase activity;antioxidant activity;binding;caspase inhibitor activity;caspase regulator activity;catalytic activity;cysteine-type endopeptidase inhibitor activity;endopeptidase inhibitor activity;endopeptidase regulator activity;enzyme binding;enzyme inhibitor activity;enzyme regulator activity;kinase binding;oxidoreductase activity;oxidoreductase activity, acting on a su…	1-cysPrx_C;AhpC-TSA	5	5	5	35.3	35.3	35.3	25.838	0	23.677	132500000	38	23.1909	22.416	NaN	24.0146	23.2086	22.7695	23.4849	22.2683	0.274344	0.217856
Peroxiredoxin-6	PRDX6	P30041	P30041	antioxidant activity;binding;carboxylic ester hydrolase activity;catalytic activity;enzyme binding;glutathione peroxidase activity;hydrolase activity;hydrolase activity, acting on ester bonds;lipase activity;oxidoreductase activity;oxidoreductase activity, acting on paired donors, with incorporation or reduction of molecular oxygen;oxidoreductase activity, acting on peroxide as acceptor;peroxidas…	1-cysPrx_C;AhpC-TSA	11	11	11	69.6	69.6	69.6	25.035	0	51.885	340310000	112	24.6976	24.0003	24.1327	25.4209	24.0756	24.057	24.3247	24.0696	0.431152	0.621527
5-AMP-activated protein kinase catalytic subunit alpha-1	PRKAA1	Q13131;Q13131-2;Q96E92	Q13131;Q13131-2	[acetyl-CoA carboxylase] kinase activity;[hydroxymethylglutaryl-CoA reductase (NADPH)] kinase activity;adenyl nucleotide binding;adenyl ribonucleotide binding;AMP-activated protein kinase activity;ATP binding;binding;cAMP-dependent protein kinase activity;catalytic activity;cation binding;chromatin binding;cyclic nucleotide-dependent protein kinase activity;histone kinase activity;histone serine …	Pkinase	58	58	50	88.9	88.9	78.4	64.009	0	323.31	23096000000	1322	30.6746	30.6669	30.7536	30.2923	30.5952	30.6785	30.4357	30.6178	0.0150442	0.0454035
5-AMP-activated protein kinase catalytic subunit alpha-2	PRKAA2	P54646;A0A087WXX9	P54646;A0A087WXX9	[acetyl-CoA carboxylase] kinase activity;[hydroxymethylglutaryl-CoA reductase (NADPH)] kinase activity;adenyl nucleotide binding;adenyl ribonucleotide binding;AMP-activated protein kinase activity;ATP binding;binding;catalytic activity;cation binding;chromatin binding;histone kinase activity;histone serine kinase activity;ion binding;kinase activity;metal ion binding;nucleotide binding;phosphotra…	Pkinase	50	42	42	86.6	73.2	73.2	62.319	0	323.31	8062500000	836	29.095	29.1782	29.1457	28.7114	29.0517	29.0569	29.076	29.1356	-0.0474887	0.166664
5-AMP-activated protein kinase subunit beta-1	PRKAB1	Q9Y478;F5H2X8;F5H610;F5H4Y8	Q9Y478	AMP-activated protein kinase activity;catalytic activity;kinase activity;phosphotransferase activity, alcohol group as acceptor;protein kinase activity;protein serine/threonine kinase activity;transferase activity;transferase activity, transferring phosphorus-containing groups	AMPKBI	24	24	22	93.7	93.7	89.6	30.382	0	227.89	9841500000	638	29.5238	29.5589	29.4532	29.1539	29.497	29.463	29.2319	29.4561	0.0104928	0.0327554
5-AMP-activated protein kinase subunit beta-2	PRKAB2	O43741;O43741-2	O43741;O43741-2	binding;identical protein binding;protein binding	AMPKBI	15	13	13	70.6	66.5	66.5	30.302	0	109.69	2761200000	297	27.4113	27.6511	27.4996	27.1334	27.4096	27.3403	27.1839	27.333	0.107174	0.396552
cAMP-dependent protein kinase catalytic subunit alpha	PRKACA;KIN27	P17612-2;P17612;Q15136;K7ERP6;K7ENJ5	P17612-2;P17612;Q15136	adenyl nucleotide binding;adenyl ribonucleotide binding;ATP binding;binding;cAMP-dependent protein kinase activity;catalytic activity;cyclic nucleotide-dependent protein kinase activity;enzyme binding;kinase activity;kinase binding;nucleotide binding;phosphotransferase activity, alcohol group as acceptor;protein binding;protein kinase A binding;protein kinase A regulatory subunit binding;protein …	Pkinase	10	2	2	34.4	8.7	8.7	39.821	0	4.272	105750000	19	22.5416	22.6325	NaN	NaN	NaN	22.4713	22.5579	22.687	0.0149717	0.0578458
cAMP-dependent protein kinase catalytic subunit beta	PRKACB	P22694-2;A0A0A0MS54;P22694-4;P22694-3;P22694;P22694-5;P22694-7;P22694-6;P22694-9;A0A087WVC4;P22694-10;B1APF7;B1APG1;B1APG0;B1APG2;B1APF8;B1APF9;B1APG3;P22694-8	P22694-2;A0A0A0MS54;P22694-4;P22694-3;P22694;P22694-5;P22694-7;P22694-6;P22694-9;A0A087WVC4;P22694-10;B1APF7;B1APG1;B1APG0;B1APG2;B1APF8;B1APF9;B1APG3;P22694-8	adenyl nucleotide binding;adenyl ribonucleotide binding;ATP binding;binding;cAMP-dependent protein kinase activity;catalytic activity;cation binding;cyclic nucleotide-dependent protein kinase activity;enzyme binding;ion binding;kinase activity;magnesium ion binding;metal ion binding;nucleotide binding;phosphotransferase activity, alcohol group as acceptor;protein binding;protein kinase activity;p…	Pkinase	15	15	7	39.9	39.9	21.1	46.235	0	27.044	486930000	107	24.7501	24.8155	24.9568	24.3505	24.936	24.8512	25.041	24.9259	-0.22032	0.80816
5-AMP-activated protein kinase subunit gamma-1	PRKAG1	P54619;P54619-2;P54619-3;F8VYY9;H0YIC9;F8VVA3;F8VSL2;H0YHF8;F8VZX1;F8VRY2;F8VSH3;F8VPF5;F8W046	P54619;P54619-2;P54619-3;F8VYY9;H0YIC9	adenyl nucleotide binding;adenyl ribonucleotide binding;ADP binding;AMP binding;AMP-activated protein kinase activity;ATP binding;binding;cAMP-dependent protein kinase activity;cAMP-dependent protein kinase regulator activity;catalytic activity;cyclic nucleotide-dependent protein kinase activity;enzyme binding;enzyme regulator activity;kinase activity;kinase binding;kinase regulator activity;nucl…	CBS	34	34	28	91.5	91.5	84.9	37.579	0	321	6191200000	648	28.7272	28.8065	28.728	27.8151	28.7085	28.6985	28.7548	28.7993	-0.221069	0.413252
5-AMP-activated protein kinase subunit gamma-2	PRKAG2	Q9UGJ0-3;Q9UGJ0;E9PGP6;F8WDB5;F8WDA1	Q9UGJ0-3;Q9UGJ0;E9PGP6	adenyl nucleotide binding;adenyl ribonucleotide binding;ADP binding;AMP binding;AMP-activated protein kinase activity;ATP binding;binding;cAMP-dependent protein kinase inhibitor activity;cAMP-dependent protein kinase regulator activity;catalytic activity;enzyme activator activity;enzyme binding;enzyme inhibitor activity;enzyme regulator activity;kinase activator activity;kinase activity;kinase bi…	CBS	18	12	2	39	31.6	6.5	58.438	0	56.156	343570000	93	24.5071	24.5699	24.5333	24.022	24.5461	24.6084	24.6509	24.65	-0.205771	0.771784
cAMP-dependent protein kinase type II-alpha regulatory subunit	PRKAR2A	P13861-2;P13861;H7C1L0;H7C4A9;C9J830	P13861-2;P13861;H7C1L0	adenyl nucleotide binding;adenyl ribonucleotide binding;AMP binding;binding;cAMP binding;cAMP-dependent protein kinase inhibitor activity;cAMP-dependent protein kinase regulator activity;cyclic nucleotide binding;enzyme binding;enzyme inhibitor activity;enzyme regulator activity;kinase binding;kinase inhibitor activity;kinase regulator activity;nucleotide binding;protein binding;protein kinase A …	cNMP_binding;RIIa	3	3	3	13.6	13.6	13.6	43.066	0	14.371	17562000	21	NaN	20.3963	NaN	21.4175	NaN	NaN	NaN	21.0527	-0.145791	0
Protein kinase C delta type;Protein kinase C delta type regulatory subunit;Protein kinase C delta type catalytic subunit	PRKCD	Q05655;Q05655-2;C9K0E3;C9JZU8;C9J9P1	Q05655;Q05655-2;C9K0E3	adenyl nucleotide binding;adenyl ribonucleotide binding;ATP binding;binding;calcium-independent protein kinase C activity;catalytic activity;cation binding;enzyme activator activity;enzyme binding;enzyme regulator activity;insulin receptor substrate binding;ion binding;kinase activity;metal ion binding;non-membrane spanning protein tyrosine kinase activity;nucleotide binding;phosphotransferase ac…	C1_1;Pkinase;Pkinase_C	7	6	6	13.6	12.1	12.1	77.504	0	7.7176	76058000	34	22.0855	22.1611	22.1878	22.4021	22.3539	22.17	22.4061	22.4185	-0.128028	0.698977
Protein kinase C theta type;Protein kinase C	PRKCQ	Q04759-2;Q04759;A0A087X0I9;Q04759-3	Q04759-2;Q04759;A0A087X0I9;Q04759-3	acid-amino acid ligase activity;adenyl nucleotide binding;adenyl ribonucleotide binding;ATP binding;binding;catalytic activity;cation binding;ion binding;kinase activity;ligase activity;ligase activity, forming carbon-nitrogen bonds;metal ion binding;nucleotide binding;phosphotransferase activity, alcohol group as acceptor;protein kinase activity;protein kinase C activity;protein serine/threonine…	C1_1;Pkinase;Pkinase_C	16	16	15	35.8	35.8	34.2	74.286	0	106.03	471770000	154	25.0264	25.1212	24.9581	24.3959	25.0517	24.5943	25.1108	24.7734	-0.00715971	0.0118692
Glucosidase 2 subunit beta	PRKCSH	K7ELL7;P14314-2;P14314	K7ELL7;P14314-2;P14314	binding;calcium ion binding;cation binding;enzyme binding;ion binding;ion channel binding;kinase binding;metal ion binding;nucleic acid binding;phosphoprotein binding;protein binding;protein kinase binding;protein kinase C binding;RNA binding	EF-hand_5;PRKCSH-like	3	3	3	6.2	6.2	6.2	60.192	0	4.2479	21752000	7	21.2614	NaN	NaN	21.9081	NaN	NaN	NaN	NaN	NaN	0
Serine/threonine-protein kinase D1;Serine/threonine-protein kinase	PRKD1	Q15139;F8WBA3;F8VZ98;H0YHL5	Q15139;F8WBA3	adenyl nucleotide binding;adenyl ribonucleotide binding;ATP binding;binding;catalytic activity;cation binding;identical protein binding;ion binding;kinase activity;metal ion binding;nucleotide binding;phosphotransferase activity, alcohol group as acceptor;protein binding;protein kinase activity;protein kinase C activity;protein serine/threonine kinase activity;purine nucleotide binding;purine rib…	C1_1;PH;Pkinase	16	9	9	27.5	17	17	101.7	0	30.401	146540000	78	23.4848	23.4326	23.6635	23.1929	23.425	23.0772	22.8556	23.0594	0.339167	1.16531
Serine/threonine-protein kinase;Serine/threonine-protein kinase D2	PRKD2	B4DTS2;Q9BZL6;Q9BZL6-2;M0QZ82;M0QXC6;M0QZC2;M0R2Z8;J3KMW1;C9JDA4;J3KNE8;E7ET86;A0A096LNR9;Q00532;Q8IVW4-2;Q92772;Q8IVW4;Q00532-2;Q9NRP7-2;Q9NRP7	B4DTS2;Q9BZL6;Q9BZL6-2	adenyl nucleotide binding;adenyl ribonucleotide binding;ATP binding;binding;catalytic activity;cation binding;cyclin-dependent protein kinase activity;ion binding;kinase activity;magnesium ion binding;metal ion binding;nucleotide binding;phosphotransferase activity, alcohol group as acceptor;protein binding;protein kinase activity;protein kinase C activity;protein serine/threonine kinase activity…	C1_1;PH;Pkinase	24	24	19	43.7	43.7	36.1	97.742	0	98.112	1398000000	313	26.6943	26.9366	26.6621	26.3092	26.0135	25.9938	25.7674	25.9712	0.714085	2.63422
Serine/threonine-protein kinase D3	PRKD3	O94806;O94806-2;H0Y5M6;C9JKP8	O94806	adenyl nucleotide binding;adenyl ribonucleotide binding;ATP binding;binding;catalytic activity;cation binding;ion binding;kinase activity;metal ion binding;nucleotide binding;phosphotransferase activity, alcohol group as acceptor;protein kinase activity;protein kinase C activity;protein serine/threonine kinase activity;purine nucleotide binding;purine ribonucleoside triphosphate binding;purine ri…	C1_1;PH;Pkinase	21	19	17	31.5	29	25.7	100.47	0	63.895	853800000	206	25.9621	26.0209	26.088	25.5891	25.8121	25.7413	25.7525	25.7768	0.144333	0.605974
DNA-dependent protein kinase catalytic subunit	PRKDC	P78527;P78527-2	P78527;P78527-2	adenyl nucleotide binding;adenyl ribonucleotide binding;ATP binding;binding;catalytic activity;DNA binding;DNA-dependent protein kinase activity;kinase activity;nucleic acid binding;nucleotide binding;phosphotransferase activity, alcohol group as acceptor;protein binding;protein kinase activity;protein serine/threonine kinase activity;purine nucleotide binding;purine ribonucleoside triphosphate b…	FAT;FATC;NUC194;PI3_PI4_kinase	146	146	146	35.9	35.9	35.9	469.08	0	323.31	13016000000	2233	29.3421	29.5093	29.4251	29.0755	29.685	29.5148	29.7507	29.6838	-0.320583	1.6239
cGMP-dependent protein kinase 1	PRKG1	Q13976;Q13976-2;A0A0A0MSB3;Q13976-3;B1ALS0;B7ZA25;Q13237-2;Q13237	Q13976;Q13976-2;A0A0A0MSB3	adenyl nucleotide binding;adenyl ribonucleotide binding;ATP binding;binding;calcium channel regulator activity;catalytic activity;cGMP binding;cGMP-dependent protein kinase activity;channel regulator activity;cyclic nucleotide binding;cyclic nucleotide-dependent protein kinase activity;GMP binding;guanyl nucleotide binding;guanyl ribonucleotide binding;kinase activity;nucleotide binding;phosphotr…	cNMP_binding;Pkinase	34	34	34	57.8	57.8	57.8	76.364	0	180.66	2078200000	365	26.9217	27.0182	27.1197	26.6278	27.1571	27.0217	27.1896	27.227	-0.226991	1.01777
Pre-mRNA-processing factor 19	PRPF19	Q9UMS4;F5GY56;H0YGF3;H0YGZ5	Q9UMS4;F5GY56	acid-amino acid ligase activity;binding;catalytic activity;identical protein binding;ligase activity;ligase activity, forming carbon-nitrogen bonds;protein binding;small conjugating protein ligase activity;ubiquitin-protein ligase activity;ubiquitin-ubiquitin ligase activity	Prp19;U-box;WD40	6	6	6	23.2	23.2	23.2	55.18	0	8.9066	82486000	27	22.6671	22.1759	22.2987	22.3305	22.2305	22.3382	22.0969	22.143	0.165917	0.680802
Ribose-phosphate pyrophosphokinase 1;Ribose-phosphate pyrophosphokinase 2	PRPS1;PRPS2	P60891;B1ALA9;P60891-2;P11908;P11908-2;B7ZB02;H7C540;A0A0B4J207;P21108;B1ALA7;A6NMS2;D3YTJ7	P60891;B1ALA9;P60891-2;P11908;P11908-2;B7ZB02	adenyl nucleotide binding;adenyl ribonucleotide binding;ADP binding;AMP binding;ATP binding;binding;carbohydrate binding;catalytic activity;cation binding;diphosphotransferase activity;GDP binding;guanyl nucleotide binding;guanyl ribonucleotide binding;identical protein binding;ion binding;kinase activity;magnesium ion binding;metal ion binding;nucleotide binding;protein binding;protein dimerizat…	Pribosyl_synth;Pribosyltran_N	7	7	7	31.1	31.1	31.1	34.834	0	20.971	119630000	29	22.7494	22.8279	22.6737	23.1478	23.2601	NaN	23.1027	22.7128	-0.175483	0.416535
Proteasome subunit alpha type-5	PSMA5	P28066;P28066-2	P28066;P28066-2	catalytic activity;endopeptidase activity;hydrolase activity;peptidase activity;peptidase activity, acting on L-amino acid peptides;threonine-type endopeptidase activity;threonine-type peptidase activity	Proteasome;Proteasome_A_N	2	2	2	13.7	13.7	13.7	26.411	0	10.925	29464000	7	20.4787	NaN	NaN	22.6338	NaN	NaN	NaN	NaN	NaN	0
Proteasome subunit alpha type-7;Proteasome subunit alpha type-7-like	PSMA7;PSMA8	O14818;O14818-2;H0Y586;Q8TAA3-2;Q8TAA3-5;Q8TAA3;O14818-4;A0A087WYS6;F5GY34	O14818;O14818-2;H0Y586;Q8TAA3-2;Q8TAA3-5;Q8TAA3	binding;catalytic activity;endopeptidase activity;hydrolase activity;identical protein binding;peptidase activity;peptidase activity, acting on L-amino acid peptides;protein binding;threonine-type endopeptidase activity;threonine-type peptidase activity	Proteasome;Proteasome_A_N	9	9	9	48.8	48.8	48.8	27.887	0	24.707	62711000	12	22.3083	22.1171	NaN	22.9777	NaN	NaN	22.4867	NaN	-0.0190061	0
Proteasome subunit beta type-3	PSMB3	A0A087WUL2;P49720;A0A087WXQ8;A0A087WY10	A0A087WUL2;P49720;A0A087WXQ8;A0A087WY10	catalytic activity;endopeptidase activity;hydrolase activity;peptidase activity;peptidase activity, acting on L-amino acid peptides;threonine-type endopeptidase activity;threonine-type peptidase activity	Proteasome	3	3	3	36.6	36.6	36.6	16.161	0	5.4974	12812000	8	21.3394	NaN	NaN	21.4876	NaN	NaN	NaN	NaN	NaN	0
Proteasome subunit beta type-5	PSMB5	H0YJM8;P28074-2;P28074;P28074-3	H0YJM8;P28074-2;P28074	catalytic activity;endopeptidase activity;hydrolase activity;peptidase activity;peptidase activity, acting on L-amino acid peptides;threonine-type endopeptidase activity;threonine-type peptidase activity	Proteasome	5	5	5	50.8	50.8	50.8	12.747	0	10.25	62429000	18	22.3366	21.5073	21.5337	22.807	21.1264	NaN	21.7573	NaN	0.60426	0.514449
26S protease regulatory subunit 7	PSMC2	P35998;P35998-2	P35998;P35998-2	adenyl nucleotide binding;adenyl ribonucleotide binding;ATP binding;ATPase activity;binding;catalytic activity;hydrolase activity;hydrolase activity, acting on acid anhydrides;hydrolase activity, acting on acid anhydrides, in phosphorus-containing anhydrides;nucleoside-triphosphatase activity;nucleotide binding;protein binding;purine nucleotide binding;purine ribonucleoside triphosphate binding;p…	AAA	4	4	4	14.8	14.8	14.8	48.633	0.006555	1.8969	45781000	4	21.524	NaN	NaN	21.8488	NaN	NaN	21.9761	NaN	-0.289638	0
26S proteasome non-ATPase regulatory subunit 14	PSMD14	O00487;C9JW37	O00487;C9JW37	binding;catalytic activity;cation binding;endopeptidase activator activity;endopeptidase regulator activity;enzyme activator activity;enzyme regulator activity;hydrolase activity;ion binding;metal ion binding;metallopeptidase activity;peptidase activator activity;peptidase activity;peptidase activity, acting on L-amino acid peptides;peptidase regulator activity;proteasome binding;protein binding;…	JAB;MitMem_reg	3	3	3	22.3	22.3	22.3	34.577	0	12.597	19093000	14	NaN	20.5432	NaN	21.2719	NaN	NaN	NaN	NaN	NaN	0
Proteasome activator complex subunit 3	PSME3	B3KQ25;K7ESG5;P61289;P61289-3;P61289-2;K9J957;K7EMD0;K7EPX6;K7EKR3;A0A087WTV2;K7ENH2	B3KQ25;K7ESG5;P61289;P61289-3;P61289-2;K9J957;K7EMD0;K7EPX6;K7EKR3;A0A087WTV2;K7ENH2	binding;endopeptidase activator activity;endopeptidase regulator activity;enzyme activator activity;enzyme regulator activity;identical protein binding;p53 binding;peptidase activator activity;peptidase regulator activity;protein binding	PA28_alpha;PA28_beta	4	4	4	28	28	28	22.455	0	5.4889	30714000	22	21.0108	20.8241	20.5524	22.4308	20.32	20.6641	NaN	20.5153	0.704699	0.65696
Polypyrimidine tract-binding protein 1	PTBP1	P26599;P26599-2;P26599-3;A6NLN1;A0A0D9SF20;K7EKJ7;K7ELW5;K7ES59;K7EK45;A0A087WUW5;X6R242;A0A087WU68;O95758-1;O95758-6;O95758-2;O95758;O95758-5;O95758-4	P26599;P26599-2;P26599-3;A6NLN1;A0A0D9SF20	binding;nucleic acid binding;nucleotide binding;poly-pyrimidine tract binding;pre-mRNA binding;RNA binding;single-stranded RNA binding	RRM_1	12	12	12	36.7	36.7	36.7	57.221	0	50.956	188110000	71	23.5953	23.4285	23.1939	23.7834	23.3789	22.9849	23.2664	23.1046	0.31657	1.08026
Prostaglandin E synthase 3	PTGES3	A0A087WYT3;Q15185-4;Q15185;B4DDC6;Q15185-3;Q15185-2	A0A087WYT3;Q15185-4;Q15185;B4DDC6;Q15185-3	binding;catalytic activity;DNA polymerase activity;intramolecular oxidoreductase activity;isomerase activity;nucleotidyltransferase activity;prostaglandin-E synthase activity;protein binding;RNA-directed DNA polymerase activity;telomerase activity;transferase activity;transferase activity, transferring phosphorus-containing groups;unfolded protein binding	CS	3	3	3	22.6	22.6	22.6	19.155	0	6.3328	67257000	13	21.9229	21.6518	21.8159	23.5464	21.8558	21.7377	21.662	21.8892	0.44807	0.453589
Focal adhesion kinase 1	PTK2	Q05397-5;Q05397-7;Q05397;H0YBZ1;E5RGA6;E5RFW9;E5RH01;E5RG66;E5RI72;E5RH48;E5RJP0;E5RIK4;E5RG54;E5RH08	Q05397-5;Q05397-7;Q05397;H0YBZ1	actin binding;adenyl nucleotide binding;adenyl ribonucleotide binding;ATP binding;binding;catalytic activity;cytoskeletal protein binding;enzyme binding;JUN kinase binding;kinase activity;kinase binding;molecular transducer activity;non-membrane spanning protein tyrosine kinase activity;nucleotide binding;phosphotransferase activity, alcohol group as acceptor;protein binding;protein domain specif…	FERM_M;Focal_AT;Pkinase_Tyr	93	93	3	76.4	76.4	4.7	120.9	0	323.31	23869000000	1862	30.752	30.652	30.8599	30.5588	30.514	30.6719	30.2614	30.5527	0.205666	0.977082
Protein-tyrosine kinase 2-beta	PTK2B	Q14289-2;Q14289;E9PBI4;C9JHV9;E5RK84;E5RJ77;H0YB74;E5RHL2	Q14289-2;Q14289	adenyl nucleotide binding;adenyl ribonucleotide binding;ATP binding;binding;calmodulin-dependent protein kinase activity;catalytic activity;glutamate receptor activity;ionotropic glutamate receptor activity;kinase activity;molecular transducer activity;N-methyl-D-aspartate selective glutamate receptor activity;non-membrane spanning protein tyrosine kinase activity;nucleotide binding;phosphotransf…	FERM_M;Focal_AT;Pkinase_Tyr	22	21	21	35.5	34.6	34.6	111.18	0	60.02	246880000	99	24.0224	23.7617	23.8199	23.5423	24.2014	23.7095	23.8533	23.9128	-0.132649	0.409978
Protein-tyrosine kinase 6	PTK6	Q13882;Q13882-2	Q13882	adenyl nucleotide binding;adenyl ribonucleotide binding;ATP binding;binding;catalytic activity;identical protein binding;kinase activity;non-membrane spanning protein tyrosine kinase activity;nucleotide binding;phosphotransferase activity, alcohol group as acceptor;protein binding;protein kinase activity;protein tyrosine kinase activity;purine nucleotide binding;purine ribonucleoside triphosphate…	Pkinase_Tyr;SH2;SH3_9	7	6	6	18.8	17.1	17.1	51.834	0	8.296	86817000	24	NaN	23.1556	22.959	22.7046	22.4982	NaN	22.3207	22.7081	0.430742	1.17758
Prothymosin alpha;Prothymosin alpha, N-terminally processed;Thymosin alpha-1	PTMA	B8ZZQ6;P06454-2;P06454;B8ZZA1;A0A087WUT1;B8ZZW7;H7C2N1	B8ZZQ6;P06454-2;P06454;B8ZZA1;A0A087WUT1;B8ZZW7;H7C2N1		Prothymosin	4	4	4	27.1	27.1	27.1	11.758	0	16.322	190900000	44	24.3327	NaN	23.2829	24.6073	23.2119	NaN	24.0081	23.6055	0.465801	0.428719
Polymerase I and transcript release factor	PTRF	Q6NZI2;Q6NZI2-2;Q6NZI2-3	Q6NZI2;Q6NZI2-2	binding;nucleic acid binding;RNA binding;rRNA binding;rRNA primary transcript binding	PTRF_SDPR	5	5	5	17.9	17.9	17.9	43.476	0	17.044	74735000	32	21.9926	22.8858	21.7609	22.206	22.2903	NaN	22.0583	22.1598	0.0418825	0.0497841
Poly(U)-binding-splicing factor PUF60	PUF60	Q9UHX1-4;Q9UHX1-6;Q9UHX1-3;Q9UHX1-5;Q9UHX1-2;Q9UHX1;E9PQ56;H0YEM1;E9PN18;E9PMU7;E9PL19;H0YCP8	Q9UHX1-4;Q9UHX1-6;Q9UHX1-3;Q9UHX1-5;Q9UHX1-2;Q9UHX1;E9PQ56;H0YEM1;E9PN18;E9PMU7	binding;DNA binding;identical protein binding;nucleic acid binding;nucleotide binding;protein binding	RRM_1	6	6	6	22.8	22.8	22.8	54.024	0	11.915	79052000	40	21.666	22.9937	22.3642	22.6593	NaN	NaN	22.1239	22.1062	0.305739	0.291888
Pyrroline-5-carboxylate reductase 1, mitochondrial;Pyrroline-5-carboxylate reductase	PYCR1	P32322-2;P32322;J3QL24;J3KQ22;E2QRB3;P32322-3;J3KTA8;J3QKT3;J3QRZ0;J3QLK9;J3QL32;J3QKT4;J3QR88;J3QL23	P32322-2;P32322;J3QL24;J3KQ22;E2QRB3;P32322-3;J3KTA8;J3QKT3;J3QRZ0;J3QLK9;J3QL32;J3QKT4	binding;catalytic activity;identical protein binding;oxidoreductase activity;oxidoreductase activity, acting on the CH-NH group of donors;oxidoreductase activity, acting on the CH-NH group of donors, NAD or NADP as acceptor;protein binding;pyrroline-5-carboxylate reductase activity	F420_oxidored;P5CR_dimer	4	4	3	18.4	18.4	14.2	33.34	0	9.7658	27695000	18	21.2371	NaN	21.046	21.6783	20.965	NaN	NaN	NaN	0.355486	0
Glutamine--tRNA ligase	QARS	P47897-2;P47897;F2Z2V6;C9J165;H7C0R3	P47897-2;P47897;F2Z2V6;C9J165	adenyl nucleotide binding;adenyl ribonucleotide binding;aminoacyl-tRNA ligase activity;ATP binding;binding;catalytic activity;glutamine-tRNA ligase activity;ligase activity;ligase activity, forming aminoacyl-tRNA and related compounds;ligase activity, forming carbon-oxygen bonds;nucleotide binding;purine nucleotide binding;purine ribonucleoside triphosphate binding;purine ribonucleotide binding;r…	tRNA_synt_1c_R1;tRNA_synt_1c_R2;tRNA-synt_1c;tRNA-synt_1c_C	4	4	4	6.5	6.5	6.5	86.578	0	10.472	313270000	25	24.1301	24.1446	24.1099	24.2238	24.0666	24.3269	NaN	NaN	-0.0446601	0.194751
Protein QIL1	QIL1;C19orf70	Q5XKP0;K7EIR2	Q5XKP0;K7EIR2			5	5	5	79.7	79.7	79.7	13.087	0	88.249	404710000	166	24.4244	24.4898	24.2927	24.2723	24.6681	24.4247	24.5385	24.262	-0.10354	0.463357
Ras-related protein Rab-1A;Ras-related protein Rab-1B;Putative Ras-related protein Rab-1C;Ras-related protein Rab-10;Ras-related protein Rab-8B;Ras-related protein Rab-8A;Ras-related protein Rab-15	RAB1B;RAB1A;RAB1C;RAB8B;RAB10;RAB8A;RAB15	E9PLD0;E7END7;P62820-2;Q9H0U4;Q92928;P62820;H0YLJ8;H0YL94;H0YMN7;A0A087WTI1;H0YNE9;P62820-3;P61026;Q92930;P61006-2;P61006;P59190-2;P59190	E9PLD0;E7END7;P62820-2;Q9H0U4;Q92928;P62820;H0YLJ8;H0YL94;H0YMN7;A0A087WTI1;H0YNE9;P62820-3;P61026;Q92930;P61006-2;P61006;P59190-2;P59190	binding;catalytic activity;cytoskeletal protein binding;enzyme binding;GDP binding;GTP binding;GTPase activity;GTPase binding;guanyl nucleotide binding;guanyl ribonucleotide binding;hydrolase activity;hydrolase activity, acting on acid anhydrides;hydrolase activity, acting on acid anhydrides, in phosphorus-containing anhydrides;myosin binding;myosin V binding;nucleoside-triphosphatase activity;nu…	Ras	2	2	1	16	16	9.5	18.483	0.00083963	2.9948	59850000	10	22.2002	21.5951	NaN	21.8567	21.8843	21.4483	22.1594	NaN	0.0533708	0.06875
Ras-related protein Rab-7a	RAB7A	C9J8S3;P51149;C9J4S4;C9IZZ0;C9J4V0;C9J592;C9J7D1	C9J8S3;P51149;C9J4S4;C9IZZ0;C9J4V0;C9J592	binding;catalytic activity;GDP binding;GTP binding;GTPase activity;guanyl nucleotide binding;guanyl ribonucleotide binding;hydrolase activity;hydrolase activity, acting on acid anhydrides;hydrolase activity, acting on acid anhydrides, in phosphorus-containing anhydrides;nucleoside-triphosphatase activity;nucleotide binding;purine nucleotide binding;purine ribonucleoside triphosphate binding;purin…	Ras	3	3	3	23.8	23.8	23.8	18.026	0	5.3093	15678000	15	22.3589	NaN	NaN	21.7676	NaN	NaN	NaN	NaN	NaN	0
Rab-like protein 3	RABL3	Q5HYI8;F8WF50;F8WDC7;C9JXM3;H7C533;F8WAX9	Q5HYI8;F8WF50;F8WDC7;C9JXM3	binding;catalytic activity;GTP binding;GTPase activity;guanyl nucleotide binding;guanyl ribonucleotide binding;hydrolase activity;hydrolase activity, acting on acid anhydrides;hydrolase activity, acting on acid anhydrides, in phosphorus-containing anhydrides;nucleoside-triphosphatase activity;nucleotide binding;purine nucleotide binding;purine ribonucleoside triphosphate binding;purine ribonucleo…	Miro;Ras	9	9	9	50	50	50	26.422	0	69.411	614720000	144	24.9254	25.4985	25.3443	25.115	25.385	24.7125	25.1749	25.1754	0.108816	0.230965
GTP-binding nuclear protein Ran	RAN	P62826;J3KQE5;B5MDF5;F5H018;H0YFC6;B4DV51;A0A087X0W0	P62826;J3KQE5;B5MDF5;F5H018	androgen receptor binding;binding;catalytic activity;chromatin binding;GDP binding;GTP binding;GTPase activity;guanyl nucleotide binding;guanyl ribonucleotide binding;hormone receptor binding;hydrolase activity;hydrolase activity, acting on acid anhydrides;hydrolase activity, acting on acid anhydrides, in phosphorus-containing anhydrides;nuclear hormone receptor binding;nucleoside-triphosphatase …	Ras	13	13	13	64.8	64.8	64.8	24.423	0	31.68	556660000	138	25.2338	24.4456	24.6455	26.0903	24.7924	24.2256	24.9817	24.5682	0.461802	0.529249
Arginine--tRNA ligase, cytoplasmic	RARS	P54136;P54136-2;E5RJM9;E5RH09;E5RI24	P54136;P54136-2	adenyl nucleotide binding;adenyl ribonucleotide binding;amine binding;amino acid binding;aminoacyl-tRNA ligase activity;arginine binding;arginine-tRNA ligase activity;ATP binding;binding;carboxylic acid binding;catalytic activity;ligase activity;ligase activity, forming aminoacyl-tRNA and related compounds;ligase activity, forming carbon-oxygen bonds;nucleic acid binding;nucleotide binding;purine…	Arg_tRNA_synt_N;DALR_1;tRNA-synt_1d	9	9	9	19.5	19.5	19.5	75.378	0	13.084	70076000	42	22.1062	22.1923	21.9681	22.1245	22.18	21.9956	22.1035	22.1961	-0.0209923	0.119258
Histone-binding protein RBBP4	RBBP4	Q09028-3;Q09028;Q09028-2;Q09028-4;H0YF10;E9PNS6;H0YEU5;H0YCT5;H0YDK2;E9PNS2;E9PIC4	Q09028-3;Q09028;Q09028-2;Q09028-4	binding;enzyme binding;histone binding;histone deacetylase binding;protein binding	CAF1C_H4-bd;WD40	11	11	8	48	48	43.9	46.158	0	38.335	336270000	89	24.0881	24.0596	24.0352	24.3792	24.1854	24.6066	24.1736	24.5771	-0.245136	0.857137
Histone-binding protein RBBP7	RBBP7	E9PC52;Q16576;Q16576-2;Q5JP02;Q5JP01;Q5JNZ6	E9PC52;Q16576;Q16576-2	binding;nucleic acid binding;RNA binding	CAF1C_H4-bd;WD40	7	4	4	31.7	24.5	24.5	46.938	0	19.453	120500000	31	22.8909	22.328	22.3865	23.1975	22.8955	22.7521	22.8924	22.645	-0.0955219	0.170653
RNA-binding protein 14	RBM14;RBM14-RBM4	Q96PK6-5;A0A0A6YYI9;F8WDX3;A0A0A0MSL8;B8ZZ74;Q96PK6-3;Q96PK6-4;Q96PK6-2;Q96PK6;E9PB51;Q9BWF3	Q96PK6-5;A0A0A6YYI9;F8WDX3;A0A0A0MSL8;B8ZZ74;Q96PK6-3;Q96PK6-4;Q96PK6-2;Q96PK6	binding;binding, bridging;cation binding;ion binding;ligand-dependent nuclear receptor transcription coactivator activity;metal ion binding;miRNA binding;mRNA 3'-UTR binding;mRNA binding;nucleic acid binding;nucleotide binding;protein binding;protein binding transcription factor activity;protein binding, bridging;RNA binding;RNA polymerase II transcription cofactor activity;RNA polymerase II tran…	RRM_1;zf-CCHC	3	3	3	22.7	22.7	22.7	37.034	0	13.543	91518000	22	NaN	23.4568	NaN	22.1891	NaN	23.467	NaN	NaN	-0.644073	0
RNA-binding protein 3	RBM3	P98179	P98179	binding;nucleic acid binding;nucleotide binding;ribonucleoprotein binding;ribosomal large subunit binding;RNA binding	RRM_1	2	2	2	31.8	31.8	31.8	17.17	0	4.6746	47584000	12	NaN	23.9487	21.2855	21.8031	NaN	NaN	NaN	NaN	NaN	0
RNA-binding protein 39	RBM39	Q14498-3;Q14498-2;Q14498;G3XAC6;H0Y4X3;Q5QP23;Q5QP22;Q86U06-3;Q86U06-4;Q86U06-5;Q86U06-2;Q86U06;G3V546;G3V5Z6;H0YJJ3;G3XAP0	Q14498-3;Q14498-2;Q14498;G3XAC6;H0Y4X3	binding;nucleic acid binding;nucleotide binding;RNA binding	RBM39linker;RRM_1	12	12	12	38.2	38.2	38.2	57.089	0	26.671	304170000	75	23.8684	24.6291	24.3319	23.6541	24.2614	24.277	24.2058	24.5055	-0.191531	0.358936
RNA-binding protein 8A	RBM8A	Q9Y5S9-2;Q9Y5S9	Q9Y5S9-2;Q9Y5S9	binding;mRNA binding;nucleic acid binding;nucleotide binding;RNA binding	RRM_1	3	3	3	32.4	32.4	32.4	19.76	0	33.293	15897000	23	20.9599	NaN	20.7972	21.8233	NaN	NaN	NaN	NaN	NaN	0
RNA-binding motif protein, X chromosome;RNA-binding motif protein, X chromosome, N-terminally processed;RNA binding motif protein, X-linked-like-1	RBMX;RBMXL1	H3BR27;H3BT71;P38159-3;P38159;H0Y6E7;P38159-2;H3BNC1;Q96E39;O75526;Q8N7X1	H3BR27;H3BT71;P38159-3;P38159;H0Y6E7;P38159-2;H3BNC1;Q96E39	binding;chromatin binding;core promoter binding;DNA binding;mRNA binding;nucleic acid binding;nucleotide binding;regulatory region DNA binding;regulatory region nucleic acid binding;RNA binding;single-stranded RNA binding;transcription regulatory region DNA binding	RBM1CTR;RRM_1	6	6	6	71.8	71.8	71.8	8.6098	0	8.5538	79473000	37	NaN	22.2449	21.9268	21.6127	NaN	23.3559	22.5771	NaN	-1.03837	1.1603
Protein RCC2	RCC2	Q9P258	Q9P258	binding;cytoskeletal protein binding;enzyme binding;GTPase binding;kinase binding;microtubule binding;protein binding;protein domain specific binding;protein kinase binding;Rac GTPase binding;Ras GTPase binding;Rho GTPase binding;small GTPase binding;tubulin binding	RCC1	9	9	9	26.1	26.1	26.1	56.084	0	24.249	308790000	83	24.3057	24.5201	24.1137	24.3472	24.0128	23.8528	24.0833	24.1246	0.303286	1.59399
RalBP1-associated Eps domain-containing protein 1	REPS1	Q96D71-3;Q96D71;E9PMG1;Q96D71-2;Q96D71-4;H0YDT0;H0YE89;H0YE73;H0YCR2;F2Z3L2	Q96D71-3;Q96D71;E9PMG1;Q96D71-2;Q96D71-4;H0YDT0	binding;calcium ion binding;cation binding;ion binding;metal ion binding;protein binding;protein domain specific binding;SH3 domain binding		5	5	4	10.6	10.6	9.3	86.59	0	100.6	128290000	62	23.0844	22.823	23.0202	23.2271	23.1824	23.1998	23.1193	22.9219	-0.0671849	0.261896
E3 ubiquitin-protein ligase RING1	RING1	Q06587;Q06587-2	Q06587;Q06587-2	acid-amino acid ligase activity;binding;catalytic activity;cation binding;chromatin binding;ion binding;ligase activity;ligase activity, forming carbon-nitrogen bonds;metal ion binding;small conjugating protein ligase activity;transition metal ion binding;ubiquitin-protein ligase activity;zinc ion binding	zf-C3HC4	9	9	6	28.1	28.1	20.4	42.429	0	43.106	441550000	90	25.1307	24.9129	24.7168	24.647	25.0974	24.8024	24.5951	24.8622	0.0125861	0.0287988
Serine/threonine-protein kinase RIO2	RIOK2	Q9BVS4;Q9BVS4-2;H0Y8R4;H0Y919	Q9BVS4;Q9BVS4-2	adenyl nucleotide binding;adenyl ribonucleotide binding;ATP binding;binding;catalytic activity;kinase activity;nucleotide binding;phosphotransferase activity, alcohol group as acceptor;protein kinase activity;protein serine/threonine kinase activity;purine nucleotide binding;purine ribonucleoside triphosphate binding;purine ribonucleotide binding;ribonucleotide binding;transferase activity;transf…	RIO1;Rio2_N	17	17	17	38	38	38	63.282	0	79.676	390040000	148	25.071	24.7236	24.7545	24.5066	24.8951	24.7571	24.5369	24.9523	-0.0214119	0.0505652
Receptor-interacting serine/threonine-protein kinase 2	RIPK2	O43353;O43353-2;E7ERW9;E5RGK6;Q16566	O43353;O43353-2	adenyl nucleotide binding;adenyl ribonucleotide binding;ATP binding;binding;calcium-dependent protein kinase activity;calcium-dependent protein serine/threonine kinase activity;calmodulin binding;calmodulin-dependent protein kinase activity;CARD domain binding;catalytic activity;identical protein binding;kinase activity;LIM domain binding;molecular transducer activity;non-membrane spanning protei…	CARD;Pkinase	20	20	20	55.6	55.6	55.6	61.194	0	97.26	652520000	212	25.1818	25.1075	25.2864	24.9275	25.3322	25.2995	25.1935	25.3248	-0.161678	1.0154
E3 ubiquitin-protein ligase RING2	RNF2	Q99496;X6RFN3;Q99496-2	Q99496;X6RFN3;Q99496-2	acid-amino acid ligase activity;binding;catalytic activity;cation binding;chromatin binding;ion binding;ligase activity;ligase activity, forming carbon-nitrogen bonds;metal ion binding;protein binding;protein domain specific binding;RING-like zinc finger domain binding;small conjugating protein ligase activity;transition metal ion binding;ubiquitin-protein ligase activity;zinc ion binding	zf-C3HC4	8	5	5	30.1	20.8	20.8	37.655	0	15.356	106710000	30	22.6394	22.7865	22.9886	22.4914	22.6761	22.6349	22.7132	22.996	-0.0285487	0.0765439
Reactive oxygen species modulator 1	ROMO1	P60602;P60602-2	P60602;P60602-2		Romo1	2	2	2	54.4	54.4	54.4	8.1828	0	18.31	52586000	11	NaN	21.7658	21.6919	NaN	NaN	21.7023	21.9762	NaN	-0.110383	0.285715
Replication protein A 70 kDa DNA-binding subunit;Replication protein A 70 kDa DNA-binding subunit, N-terminally processed	RPA1	P27694;I3L4R8;I3L524;I3L2M5	P27694	binding;cation binding;chromatin binding;damaged DNA binding;DNA binding;ion binding;metal ion binding;nucleic acid binding;single-stranded DNA binding;structure-specific DNA binding	Rep_fac-A_C;Rep-A_N;tRNA_anti-codon	7	7	7	20.8	20.8	20.8	68.137	0	16.188	54638000	19	NaN	22.0375	22.2559	22.2613	21.9829	23.0159	22.0938	NaN	-0.179298	0.206574
Replication protein A 32 kDa subunit	RPA2	P15927;P15927-2;P15927-3;Q5TEJ7;Q5TEJ0	P15927;P15927-2;P15927-3;Q5TEJ7	binding;damaged DNA binding;DNA binding;enzyme binding;nucleic acid binding;phosphatase binding;protein binding;protein phosphatase binding;single-stranded DNA binding;structure-specific DNA binding;ubiquitin protein ligase binding	RPA_C;tRNA_anti-codon	5	5	5	38.9	38.9	38.9	29.247	0	44.707	69788000	34	22.2032	21.8467	21.9486	22.9807	NaN	22.664	22.4338	22.2616	-0.208352	0.265811
60S ribosomal protein L10	RPL10	X1WI28;P27635;F8W7C6;A0A087WV22;B8A6G2;A6QRI9;H7C123;H7C2C5;Q96L21	X1WI28;P27635;F8W7C6;A0A087WV22	structural constituent of ribosome;structural molecule activity	Ribosomal_L16	5	5	5	31.8	31.8	31.8	23.072	0	58.808	500260000	106	24.9695	25.0227	24.8774	25.0606	24.8207	24.8747	24.9404	24.7166	0.144452	1.23666
60S ribosomal protein L10a	RPL10A	P62906	P62906	structural constituent of ribosome;structural molecule activity	Ribosomal_L1	7	7	7	34.1	34.1	34.1	24.831	0	10.104	228210000	59	23.6776	23.5788	23.5099	23.9711	23.6122	23.8088	23.7877	23.6543	-0.0314193	0.102595
60S ribosomal protein L11	RPL11	P62913;P62913-2;Q5VVC8;Q5VVC9	P62913;P62913-2;Q5VVC8;Q5VVC9	binding;nucleic acid binding;RNA binding;rRNA binding;structural constituent of ribosome;structural molecule activity	Ribosomal_L5;Ribosomal_L5_C	6	6	6	44.4	44.4	44.4	20.252	0	14.138	319700000	56	24.0737	24.1212	24.2385	24.202	24.4478	24.26	24.4821	24.0814	-0.15898	0.787848
60S ribosomal protein L12	RPL12	P30050;P30050-2	P30050;P30050-2	structural constituent of ribosome;structural molecule activity	Ribosomal_L11;Ribosomal_L11_N	4	4	4	33.3	33.3	33.3	17.818	0	8.8114	121530000	30	22.9319	22.8576	22.7798	23.4107	22.9589	22.801	23.0704	22.7734	0.0940957	0.241329
60S ribosomal protein L13	RPL13	P26373;J3QSB4;P26373-2	P26373;J3QSB4	binding;nucleic acid binding;RNA binding;structural constituent of ribosome;structural molecule activity	Ribosomal_L13e	4	4	4	20.4	20.4	20.4	24.261	0	74.926	246990000	43	23.6358	23.8477	23.8148	24.1549	23.7968	23.9601	23.7462	23.9645	-0.00363874	0.0100712
60S ribosomal protein L13a	RPL13A;RPL13a	P40429;Q8J015;M0QYS1;M0QZU1;A0A096LPE0;Q6NVV1	P40429;Q8J015;M0QYS1	structural constituent of ribosome;structural molecule activity	Ribosomal_L13	6	6	6	28.1	28.1	28.1	23.577	0	10.508	242150000	20	23.5485	23.5722	23.6299	24.3054	24.097	23.7013	24.2439	23.8024	-0.197152	0.390997
60S ribosomal protein L15;Ribosomal protein L15	RPL15	P61313;E7EQV9;E7ENU7;E7EX53;P61313-2;E7ERA2	P61313;E7EQV9;E7ENU7;E7EX53	binding;nucleic acid binding;RNA binding;structural constituent of ribosome;structural molecule activity	Ribosomal_L15e	7	7	7	35.3	35.3	35.3	24.146	0	13.745	394940000	80	24.4903	24.1363	24.3505	24.6942	24.3397	24.5978	24.6148	24.3953	-0.069087	0.19984
60S ribosomal protein L17	RPL17;RPL17-C18orf32	A0A087WXM6;J3QQT2;J3KRX5;A0A0A6YYL6;P18621;P18621-3;J3QLC8;A0A0A0MRF8;P18621-2;J3KRB3;A0A087WWH0;J3QS96;A0A087WY81;J3KSJ0	A0A087WXM6;J3QQT2;J3KRX5;A0A0A6YYL6;P18621;P18621-3;J3QLC8;A0A0A0MRF8;P18621-2;J3KRB3;A0A087WWH0;J3QS96;A0A087WY81	structural constituent of ribosome;structural molecule activity	Ribosomal_L22	10	10	10	57.4	57.4	57.4	19.586	0	18.247	487810000	123	24.6734	24.8893	24.5201	24.9412	24.8913	24.8437	24.8445	24.6725	-0.0569787	0.207872
60S ribosomal protein L18	RPL18	H0YHA7;J3QQ67;Q07020-2;Q07020;G3V203;F8VUA6;F8VYV2;A0A075B7A0	H0YHA7;J3QQ67;Q07020-2;Q07020;G3V203;F8VUA6;F8VYV2;A0A075B7A0	binding;nucleic acid binding;RNA binding;structural constituent of ribosome;structural molecule activity	Ribosomal_L18e	9	9	9	47.9	47.9	47.9	18.863	0	20.052	310900000	95	24.1376	23.985	24.1049	24.2438	24.4203	24.352	24.0563	24.1174	-0.118681	0.531671
60S ribosomal protein L18a	RPL18A	M0R3D6;M0R1A7;M0R117;Q02543;M0R0P7	M0R3D6;M0R1A7;M0R117;Q02543;M0R0P7	binding;nucleic acid binding;RNA binding;structural constituent of ribosome;structural molecule activity	Ribosomal_L18ae	7	7	7	51.8	51.8	51.8	16.714	0	9.2238	138830000	48	23.1886	22.794	22.7276	23.3056	22.9609	23.1133	22.9154	23.2846	-0.0646048	0.148725
Ribosomal protein L19;60S ribosomal protein L19	RPL19	J3QR09;J3KTE4;P84098;J3QL15	J3QR09;J3KTE4;P84098	binding;nucleic acid binding;RNA binding;structural constituent of ribosome;structural molecule activity	Ribosomal_L19e	8	8	8	40.4	40.4	40.4	23.134	0	14.901	294490000	56	24.0721	24.1659	23.9775	24.4718	24.1287	24.0979	24.0929	24.379	-0.00277519	0.00731347
60S ribosomal protein L21	RPL21	G3V1B3;M0R181;P46778	G3V1B3;M0R181;P46778	binding;nucleic acid binding;RNA binding;structural constituent of ribosome;structural molecule activity	Ribosomal_L21e	4	4	4	46	46	46	9.8864	0	11.787	155770000	37	23.0693	22.8584	22.9772	23.3777	22.8338	22.8658	23.0744	22.5421	0.241636	0.763595
60S ribosomal protein L22	RPL22	P35268;K7ERI7;K7EJT5;K7EP65;K7EKS7;K7ELC4;K7EMH1	P35268;K7ERI7;K7EJT5;K7EP65;K7EKS7;K7ELC4;K7EMH1	binding;carbohydrate binding;glycosaminoglycan binding;heparin binding;nucleic acid binding;pattern binding;polysaccharide binding;RNA binding;structural constituent of ribosome;structural molecule activity	Ribosomal_L22e	5	5	5	52.3	52.3	52.3	14.787	0	11.788	395360000	58	23.9502	25.3239	23.9759	24.3494	24.1766	24.5342	24.3308	24.2254	0.0830684	0.0914359
60S ribosomal protein L22-like 1	RPL22L1	C9JYQ9;H0Y8C2;Q6P5R6	C9JYQ9;H0Y8C2;Q6P5R6	structural constituent of ribosome;structural molecule activity	Ribosomal_L22e	3	3	3	31.4	31.4	31.4	14.478	0	45.731	207580000	35	23.381	24.7382	NaN	23.6031	23.613	23.407	22.8363	NaN	0.621981	0.576816
60S ribosomal protein L23	RPL23	P62829;J3KT29;J3KTJ3;C9JD32;B9ZVP7	P62829;J3KT29;J3KTJ3;C9JD32;B9ZVP7	structural constituent of ribosome;structural molecule activity	Ribosomal_L14	8	8	8	64.3	64.3	64.3	14.865	0	47.879	1130200000	125	26.0308	26.3681	25.8776	26.057	26.0523	26.1956	25.996	25.9633	0.0315361	0.100744
60S ribosomal protein L23a	RPL23A	K7EMA7;H7BY10;K7ERT8;A8MUS3;P62750;K7EJV9	K7EMA7;H7BY10;K7ERT8;A8MUS3;P62750;K7EJV9	binding;nucleic acid binding;nucleotide binding;RNA binding;rRNA binding;structural constituent of ribosome;structural molecule activity	Ribosomal_L23;Ribosomal_L23eN	4	4	4	52.9	52.9	52.9	7.9232	0	6.3772	260750000	42	23.6778	24.4237	23.9998	24.0662	23.9751	24.0646	23.595	23.8244	0.177102	0.427727
60S ribosomal protein L24	RPL24	P83731;C9JXB8;C9JNW5	P83731;C9JXB8;C9JNW5	binding;nucleic acid binding;RNA binding;structural constituent of ribosome;structural molecule activity	Ribosomal_L24e	7	7	7	41.4	41.4	41.4	17.779	0	11.583	371750000	82	24.3981	24.4092	24.3528	24.7199	24.5008	24.5282	24.6653	24.523	-0.0843081	0.402747
60S ribosomal protein L26;60S ribosomal protein L26-like 1	RPL26;RPL26L1	P61254;J3KTJ8;J3QRI7;J3QQQ9;J3QQV1;J3KSS0;E5RIT6;J3QRC4;Q9UNX3;E5RHH1;J3KS10	P61254;J3KTJ8;J3QRI7;J3QQQ9;J3QQV1;J3KSS0;E5RIT6;J3QRC4;Q9UNX3	binding;nucleic acid binding;RNA binding;structural constituent of ribosome;structural molecule activity	KOW	5	5	5	32.4	32.4	32.4	17.258	0	4.3153	116690000	23	22.8201	23.1113	22.7218	22.8908	21.7079	22.4983	23.1029	22.3192	0.478945	0.795783
60S ribosomal protein L27a	RPL27A	P46776;E9PJD9;E9PLL6;E9PLX7	P46776;E9PJD9;E9PLL6;E9PLX7	binding;nucleic acid binding;RNA binding;structural constituent of ribosome;structural molecule activity	Ribosomal_L18e	8	8	8	47.3	47.3	47.3	16.561	0	26.602	451110000	89	24.5776	24.746	24.8198	24.682	24.7697	24.898	24.9967	24.7354	-0.143581	0.923411
60S ribosomal protein L28	RPL28	H0YMF4;H0YKD8;P46779-4;P46779-5;P46779;P46779-2;P46779-3;H0YLP6	H0YMF4;H0YKD8;P46779-4;P46779-5;P46779;P46779-2;P46779-3;H0YLP6	binding;nucleic acid binding;RNA binding;structural constituent of ribosome;structural molecule activity	Ribosomal_L28e	5	5	5	44.6	44.6	44.6	12.39	0	4.745	184620000	32	23.6423	23.409	23.6898	22.7148	23.4957	23.606	23.7613	23.3749	-0.195535	0.351261
60S ribosomal protein L29	RPL29	P47914	P47914	binding;carbohydrate binding;glycosaminoglycan binding;heparin binding;nucleic acid binding;pattern binding;polysaccharide binding;RNA binding;structural constituent of ribosome;structural molecule activity	Ribosomal_L29e	2	2	2	18.9	18.9	18.9	17.752	0	3.5869	118860000	27	22.6909	22.0815	22.6962	23.2542	22.3464	22.3203	22.8226	22.7135	0.130017	0.187895
60S ribosomal protein L3	RPL3	P39023;G5E9G0;H7C3M2;B5MCW2;H7C422;F8WCR1	P39023;G5E9G0;H7C3M2;B5MCW2;H7C422	binding;nucleic acid binding;RNA binding;structural constituent of ribosome;structural molecule activity	Ribosomal_L3	8	8	8	25.8	25.8	25.8	46.108	0	25.577	381190000	36	24.4099	24.1693	24.2971	24.5932	24.0746	24.4176	24.1862	24.1719	0.154778	0.639863
60S ribosomal protein L31	RPL31	P62899;H7C2W9;C9JU56;B7Z4E3;B7Z4C8;P62899-3;P62899-2	P62899;H7C2W9;C9JU56;B7Z4E3;B7Z4C8;P62899-3;P62899-2	binding;nucleic acid binding;RNA binding;structural constituent of ribosome;structural molecule activity	Ribosomal_L31e	2	2	2	19.2	19.2	19.2	14.463	0.00083264	2.9243	135560000	14	22.8483	23.2038	NaN	23.4028	NaN	NaN	22.7518	22.8532	0.349114	0.700434
60S ribosomal protein L32	RPL32	D3YTB1;F8W727;P62910;D3YTI8	D3YTB1;F8W727;P62910	structural constituent of ribosome;structural molecule activity	Ribosomal_L32e	6	6	6	55.6	55.6	55.6	15.616	0	7.4666	149190000	32	23.342	22.9738	23.2289	23.2508	23.2294	23.2804	23.144	23.3707	-0.0571885	0.253809
60S ribosomal protein L35	RPL35	P42766;F2Z388	P42766;F2Z388	binding;mRNA binding;nucleic acid binding;RNA binding;structural constituent of ribosome;structural molecule activity	Ribosomal_L29	5	5	5	34.1	34.1	34.1	14.551	0	10.416	209370000	37	23.3673	23.9481	23.8022	23.6956	23.9037	23.6085	23.5076	23.4414	0.0880055	0.220085
60S ribosomal protein L37a	RPL37A	P61513;C9J4Z3;Q6P4E4;E9PEL3;M0R0A1;M0R2L6;G5E9R3;A6NKH3	P61513;C9J4Z3;Q6P4E4;E9PEL3;M0R0A1;M0R2L6;G5E9R3	binding;cation binding;ion binding;metal ion binding;structural constituent of ribosome;structural molecule activity	Ribosomal_L37ae	6	6	6	65.2	65.2	65.2	10.275	0	11.206	198620000	47	23.0513	24.0509	23.4423	23.0904	23.175	23.5743	23.9822	23.2409	-0.0843596	0.104903
60S ribosomal protein L38	RPL38	P63173;J3KT73;J3QL01;J3KSP2	P63173;J3KT73;J3QL01	binding;nucleic acid binding;RNA binding;structural constituent of ribosome;structural molecule activity	Ribosomal_L38e	8	8	8	57.1	57.1	57.1	8.2178	0	10.48	487880000	102	24.3527	25.7085	24.823	24.5151	24.8597	24.7262	24.6276	24.711	0.118688	0.147725
Putative 60S ribosomal protein L39-like 5;60S ribosomal protein L39	RPL39P5;RPL39	Q59GN2;P62891	Q59GN2;P62891	binding;nucleic acid binding;RNA binding;structural constituent of ribosome;structural molecule activity	Ribosomal_L39	1	1	1	19.6	19.6	19.6	6.3225	0	4.706	174620000	21	NaN	24.3505	23.3823	NaN	23.2807	NaN	23.0605	23.373	0.628356	0.705702
60S ribosomal protein L4	RPL4	P36578;H3BM89;H3BTP7;H3BU31	P36578;H3BM89	binding;nucleic acid binding;RNA binding;structural constituent of ribosome;structural molecule activity	Ribos_L4_asso_C;Ribosomal_L4	9	9	9	28.1	28.1	28.1	47.697	0	31.796	448140000	93	24.6467	24.5487	24.5971	24.9917	24.6004	24.6851	24.8852	24.4562	0.0392919	0.107705
60S ribosomal protein L5	RPL5	P46777;Q5T7N0	P46777	5S rRNA binding;binding;nucleic acid binding;RNA binding;rRNA binding;structural constituent of ribosome;structural molecule activity	Ribosomal_L18_c;Ribosomal_L18p	11	11	11	49.2	49.2	49.2	34.362	0	22.76	239520000	75	23.9893	23.5556	22.9583	24.6419	23.4896	23.7109	23.8228	23.1116	0.252505	0.268121
60S ribosomal protein L6	RPL6	Q02878;F8VR69;F8VZ45;U3KQR5	Q02878	binding;DNA binding;nucleic acid binding;RNA binding;structural constituent of ribosome;structural molecule activity	Ribosomal_L6e;Ribosomal_L6e_N	9	9	9	33.7	33.7	33.7	32.728	0	19.1	220410000	65	23.6781	23.7235	23.3229	24.0946	23.6108	23.9475	23.647	23.657	-0.0108032	0.020884
60S ribosomal protein L7	RPL7	A8MUD9;P18124;C9JIJ5;C9JZ88	A8MUD9;P18124	binding;DNA binding;identical protein binding;mRNA binding;nucleic acid binding;protein binding;protein dimerization activity;protein homodimerization activity;RNA binding;structural constituent of ribosome;structural molecule activity	Ribosomal_L30;Ribosomal_L30_N	9	9	9	44.2	44.2	44.2	24.433	0	13.043	302270000	75	24.1869	23.798	23.9755	24.5136	24.0174	23.8968	24.1881	24.1065	0.0662975	0.152745
60S ribosomal protein L7a	RPL7A	P62424;Q5T8U2;Q5T8U3	P62424;Q5T8U2;Q5T8U3	binding;nucleic acid binding;RNA binding;structural constituent of ribosome;structural molecule activity	Ribosomal_L7Ae	10	10	10	48.9	48.9	48.9	29.995	0	17.626	187280000	34	23.3055	23.2308	23.1827	24.0026	23.1352	23.5097	23.8537	23.5779	-0.088695	0.138265
60S ribosomal protein L8	RPL8	E9PKZ0;P62917;G3V1A1;E9PKU4;E9PP36	E9PKZ0;P62917;G3V1A1;E9PKU4	binding;nucleic acid binding;RNA binding;rRNA binding;structural constituent of ribosome;structural molecule activity	Ribosomal_L2;Ribosomal_L2_C	4	4	4	27.8	27.8	27.8	22.389	0	9.1034	87902000	43	22.6357	22.4178	22.2394	23.1369	22.4218	NaN	22.6502	22.4046	0.115226	0.186913
60S acidic ribosomal protein P0;60S acidic ribosomal protein P0-like	RPLP0;RPLP0P6	P05388;F8VU65;Q8NHW5;F8VPE8;F8VW21;F8VWS0;P05388-2;G3V210;F8VQY6;F8VRK7;F8VZS0;F8VS58;F8VWV4;F8W1K8	P05388;F8VU65;Q8NHW5;F8VPE8;F8VW21;F8VWS0;P05388-2;G3V210;F8VQY6;F8VRK7;F8VZS0	binding;nucleic acid binding;RNA binding;structural constituent of ribosome;structural molecule activity	Ribosomal_L10	9	9	9	32.5	32.5	32.5	34.273	0	33.933	316200000	97	24.3111	23.9314	24.2373	24.6836	24.2544	23.6619	24.2017	24.027	0.254624	0.585762
60S acidic ribosomal protein P1	RPLP1	P05386	P05386	binding;nucleic acid binding;RNA binding;structural constituent of ribosome;structural molecule activity		4	4	4	79.8	79.8	79.8	11.514	0	61.039	536730000	149	25.1984	24.8365	24.5619	25.3858	25.2814	24.596	25.1349	24.7961	0.0435257	0.0640405
60S acidic ribosomal protein P2	RPLP2	P05387;H0YDD8	P05387;H0YDD8	binding;nucleic acid binding;RNA binding;structural constituent of ribosome;structural molecule activity		6	6	6	74.8	74.8	74.8	11.665	0	91.456	319840000	81	24.1728	23.7294	24.1292	24.743	24.2497	24.0098	24.5009	24.1727	-0.0396419	0.0604317
Dolichyl-diphosphooligosaccharide--protein glycosyltransferase subunit 1	RPN1	P04843;B7Z4L4;F8WF32	P04843;B7Z4L4	catalytic activity;dolichyl-diphosphooligosaccharide-protein glycotransferase activity;oligosaccharyl transferase activity;transferase activity;transferase activity, transferring glycosyl groups;transferase activity, transferring hexosyl groups	Ribophorin_I	18	18	18	42.3	42.3	42.3	68.569	0	43.939	538920000	96	24.9721	24.9169	24.8453	24.8651	25.0516	24.5087	25.3014	24.9481	-0.0526481	0.11666
Dolichyl-diphosphooligosaccharide--protein glycosyltransferase subunit 2	RPN2	P04844;P04844-2;Q5JYR7;Q5JYR4	P04844;P04844-2;Q5JYR7	binding;catalytic activity;ribonucleoprotein binding;ribosome binding;transferase activity;transferase activity, transferring glycosyl groups	Ribophorin_II	7	7	7	19.3	19.3	19.3	69.283	0	97.814	280780000	117	24.0465	23.8209	23.9587	23.9793	24.1579	24.0271	24.3774	24.179	-0.234006	1.45321
40S ribosomal protein S11	RPS11	P62280;M0QZC5;M0R1H6;M0R1H5	P62280;M0QZC5	binding;nucleic acid binding;RNA binding;rRNA binding;structural constituent of ribosome;structural molecule activity	Ribosomal_S17	11	11	11	49.4	49.4	49.4	18.431	0	32.327	760670000	133	25.2642	25.7148	25.4595	25.4953	25.3891	25.4913	25.4798	25.3675	0.0515456	0.210383
40S ribosomal protein S12	RPS12	P25398	P25398	structural constituent of ribosome;structural molecule activity	Ribosomal_L7Ae	7	7	7	62.9	62.9	62.9	14.515	0	31.849	142210000	88	23.4334	21.9467	22.7953	23.9695	22.8844	22.7253	22.8457	22.3331	0.339076	0.316416
40S ribosomal protein S13	RPS13	P62277;J3KMX5;E9PS50	P62277;J3KMX5	binding;mRNA binding;nucleic acid binding;RNA binding;rRNA binding;SSU rRNA binding;structural constituent of ribosome;structural molecule activity	Ribosomal_S13_N;Ribosomal_S15	11	11	11	52.3	52.3	52.3	17.222	0	17.952	674230000	125	25.0451	25.7529	25.0032	25.2279	25.1136	25.1473	25.1745	24.8633	0.1826	0.437189
40S ribosomal protein S14	RPS14	P62263;H0YB22;E5RH77	P62263;H0YB22;E5RH77	binding;mRNA 5'-UTR binding;mRNA binding;nucleic acid binding;RNA binding;structural constituent of ribosome;structural molecule activity;translation regulator activity	Ribosomal_S11	6	6	6	33.8	33.8	33.8	16.273	0	24.199	196510000	26	NaN	24.0937	23.8265	23.7727	23.2094	23.3644	23.7373	23.6483	0.407793	1.23054
40S ribosomal protein S15	RPS15	K7ELC2;P62841;K7EJ78;K7EQJ5;K7EM56;A0A0B4J2B4;S4R417;S4R456	K7ELC2;P62841;K7EJ78;K7EQJ5;K7EM56;A0A0B4J2B4;S4R417	binding;DNA binding;nucleic acid binding;RNA binding;structural constituent of ribosome;structural molecule activity	Ribosomal_S19	4	4	4	43.4	43.4	43.4	17.723	0	17.951	122640000	54	23.138	23.105	22.8337	23.7678	22.5657	22.4191	22.7609	22.7518	0.586784	1.47338
40S ribosomal protein S15a	RPS15A	P62244;I3L3P7;I3L246;H3BN98;H3BV27;H3BT37;I3L303;H3BVC7	P62244;I3L3P7;I3L246;H3BN98	binding;nucleic acid binding;RNA binding;structural constituent of ribosome;structural molecule activity	Reticulon;Ribosomal_S8	9	9	9	65.4	65.4	65.4	14.839	0	23.777	659430000	102	25.1209	25.3582	25.0277	25.2045	25.3696	25.2361	25.1622	25.0742	-0.0327153	0.131048
40S ribosomal protein S16	RPS16;ZNF90	M0R3H0;M0R210;P62249;M0QX76;M0R1M5;A0A087WZ27;Q6IPX4	M0R3H0;M0R210;P62249;M0QX76;M0R1M5;A0A087WZ27	binding;nucleic acid binding;RNA binding;structural constituent of ribosome;structural molecule activity	Ribosomal_S9	5	5	5	49	49	49	11.075	0	8.5007	154470000	39	23.3026	23.1181	22.943	23.8483	22.4812	22.8759	22.7374	22.9614	0.539012	1.28748
40S ribosomal protein S17-like;40S ribosomal protein S17	RPS17L;RPS17	P0CW22;P08708;H0YN88;A0A075B716;H0YN73	P0CW22;P08708;H0YN88;A0A075B716	structural constituent of ribosome;structural molecule activity	Ribosomal_S17e	5	5	5	51.9	51.9	51.9	15.55	0	21.847	132650000	49	23.1324	22.2325	22.2213	23.7064	22.8096	22.4174	23.0828	NaN	0.0532573	0.0398812
40S ribosomal protein S18	RPS18	P62269;J3JS69;A0A0G2JQH2;Q5GGW2	P62269	binding;nucleic acid binding;RNA binding;rRNA binding;structural constituent of ribosome;structural molecule activity	Ribosomal_S13	7	7	7	36.8	36.8	36.8	17.718	0	6.2201	125790000	27	23.122	22.7857	22.4716	23.8527	22.1451	22.2358	23.0154	21.8835	0.738061	0.988573
40S ribosomal protein S19	RPS19	P39019;M0R2L9;M0QXK4;M0QYF7;M0R140;A0A075B6E2	P39019;M0R2L9;M0QXK4;M0QYF7;M0R140	binding;enzyme binding;fibroblast growth factor binding;growth factor binding;identical protein binding;kinase binding;protein binding;protein dimerization activity;protein homodimerization activity;protein kinase binding;structural constituent of ribosome;structural molecule activity	Ribosomal_S19e	4	4	4	37.2	37.2	37.2	16.06	0	5.5139	59748000	23	21.2182	21.5388	21.2774	23.1272	21.5356	NaN	21.7452	21.4123	0.226006	0.15938
40S ribosomal protein S2	RPS2	P15880;H0YEN5;E9PQD7;I3L404;E9PM36;E9PMM9;E9PPT0;H3BNG3;H0YE27	P15880;H0YEN5;E9PQD7	binding;enzyme binding;fibroblast growth factor binding;growth factor binding;mRNA binding;nucleic acid binding;protein binding;RNA binding;structural constituent of ribosome;structural molecule activity	Ribosomal_S5;Ribosomal_S5_C	16	16	16	50.9	50.9	50.9	31.324	0	34.994	616590000	148	25.2929	25.2779	25.1392	25.6088	24.8943	24.9753	25.3384	25.1174	0.248319	0.905798
40S ribosomal protein S20	RPS20	P60866;P60866-2;E5RIP1;E5RJX2;G3XAN0	P60866;P60866-2;E5RIP1;E5RJX2;G3XAN0	binding;nucleic acid binding;RNA binding;structural constituent of ribosome;structural molecule activity	Ribosomal_S10	2	2	2	23.5	23.5	23.5	13.373	0	5.6778	70323000	19	22.4735	21.4245	21.9719	22.9419	21.6688	21.5529	22.2179	21.5836	0.44714	0.580638
40S ribosomal protein S23	RPS23	P62266;D6RD47;D6RDJ2;D6RIX0;D6R9I7	P62266;D6RD47	structural constituent of ribosome;structural molecule activity	Ribosom_S12_S23	7	7	7	50.3	50.3	50.3	15.807	0	10.25	415130000	46	24.5378	24.4114	24.3728	24.9824	24.5667	24.648	24.6232	24.592	-0.0313859	0.0802381
40S ribosomal protein S24	RPS24	E7ETK0;A0A087WUS0;P62847-2;P62847-3;P62847;P62847-4	E7ETK0;A0A087WUS0;P62847-2;P62847-3;P62847;P62847-4	binding;nucleotide binding;protein binding;structural constituent of ribosome;structural molecule activity;translation initiation factor binding	Ribosomal_S24e	5	5	5	42.7	42.7	42.7	15.197	0	9.3158	265000000	72	23.9707	24.0002	23.6501	24.0847	23.9363	23.8601	23.7727	23.7977	0.0847416	0.35872
40S ribosomal protein S25	RPS25	P62851	P62851	binding;nucleic acid binding;RNA binding;structural constituent of ribosome;structural molecule activity	Ribosomal_S25	5	5	5	31.2	31.2	31.2	13.742	0	5.7538	104710000	21	23.1142	22.7716	NaN	23.815	23.0063	NaN	23.0279	22.8212	0.28179	0.376529
40S ribosomal protein S26	RPS26	P62854;Q5JNZ5	P62854	binding;mRNA binding;nucleic acid binding;RNA binding;structural constituent of ribosome;structural molecule activity	Ribosomal_S26e	6	6	6	46.1	46.1	46.1	13.015	0	22.547	243700000	60	23.478	23.8348	23.9639	24.1497	23.9811	23.8409	23.6262	24.0034	-0.0062809	0.0127452
40S ribosomal protein S27	RPS27	P42677;Q5T4L4;C9J1C5	P42677;Q5T4L4	binding;cation binding;DNA binding;ion binding;metal ion binding;nucleic acid binding;structural constituent of ribosome;structural molecule activity;transition metal ion binding;zinc ion binding	Ribosomal_S27e	5	5	1	42.9	42.9	13.1	9.461	0	14.536	526260000	92	24.7617	25.0237	24.7773	24.9419	25.0354	24.8318	25.0041	24.9508	-0.0793552	0.457956
40S ribosomal protein S3	RPS3	P23396;P23396-2;E9PL09;E9PPU1;H0YEU2;F2Z2S8;H0YCJ7;E9PQ96;E9PJH4;H0YF32;E9PK82;E9PSF4;E9PQX2	P23396;P23396-2;E9PL09;E9PPU1;H0YEU2;F2Z2S8;H0YCJ7	binding;carbon-oxygen lyase activity;catalytic activity;damaged DNA binding;DNA binding;DNA N-glycosylase activity;DNA-(apurinic or apyrimidinic site) lyase activity;enzyme binding;hydrolase activity;hydrolase activity, acting on glycosyl bonds;hydrolase activity, hydrolyzing N-glycosyl compounds;iron-sulfur cluster binding;kinase binding;lyase activity;metal cluster binding;mRNA binding;NF-kappa…	KH_2;Ribosomal_S3_C	11	11	11	56	56	56	26.688	0	30.577	302560000	68	24.3986	24.2811	24.2257	24.8169	23.6915	23.6807	24.1884	23.782	0.594936	1.79242
40S ribosomal protein S3a	RPS3A	P61247;D6RAT0;H0Y9Y4;D6RG13;D6R9B6;H0Y8L7;E9PFI5;D6RB09;D6RED7;D6RAS7;D6RI02;D6RGE0	P61247;D6RAT0;H0Y9Y4;D6RG13;D6R9B6;H0Y8L7;E9PFI5	binding;nucleic acid binding;RNA binding;structural constituent of ribosome;structural molecule activity	Ribosomal_S3Ae	11	11	11	45.5	45.5	45.5	29.945	0	19.218	287820000	62	24.058	24.2872	23.7988	24.3433	23.9525	23.9318	24.4068	23.9815	0.053638	0.11894
40S ribosomal protein S4, X isoform	RPS4X	P62701;A6NH36;C9JEH7;Q8TD47;P22090	P62701	binding;nucleic acid binding;RNA binding;rRNA binding;structural constituent of ribosome;structural molecule activity	KOW;Ribosomal_S4e;RS4NT;S4	22	22	22	72.2	72.2	72.2	29.597	0	72.23	1185200000	202	25.5769	26.473	25.8469	26.078	25.9394	25.9659	25.8513	25.6834	0.13371	0.276518
40S ribosomal protein S5;40S ribosomal protein S5, N-terminally processed	RPS5	M0R0F0;P46782;M0R0R2;M0QZN2	M0R0F0;P46782;M0R0R2;M0QZN2	binding;mRNA binding;nucleic acid binding;RNA binding;structural constituent of ribosome;structural molecule activity	Ribosomal_S7	6	6	6	56	56	56	22.391	0	62.306	204870000	86	23.5876	23.5775	22.9102	23.7119	23.2151	23.1032	23.4648	23.2435	0.190135	0.43076
40S ribosomal protein S6	RPS6	P62753;A2A3R5;A2A3R7	P62753;A2A3R5	binding;enzyme binding;kinase binding;protein binding;protein kinase binding;structural constituent of ribosome;structural molecule activity	Ribosomal_S6e	7	7	7	32.5	32.5	32.5	28.68	0	37.474	332980000	69	24.4563	23.8617	24.0531	24.3987	24.0093	24.172	24.4959	24.0607	0.00798512	0.0150915
Ribosomal protein S6 kinase alpha-1;Ribosomal protein S6 kinase	RPS6KA1	Q15418;E9PGT3;Q15418-4;Q15418-2;Q15418-3;E9PAN7;Q5SVM6;E9PMM7;Q5SVM7	Q15418;E9PGT3;Q15418-4;Q15418-2;Q15418-3	adenyl nucleotide binding;adenyl ribonucleotide binding;ATP binding;binding;caspase inhibitor activity;caspase regulator activity;catalytic activity;cation binding;cysteine-type endopeptidase inhibitor activity;endopeptidase inhibitor activity;endopeptidase regulator activity;enzyme inhibitor activity;enzyme regulator activity;ion binding;kinase activity;magnesium ion binding;metal ion binding;nu…	Pkinase;Pkinase_C	88	88	61	89.5	89.5	72.1	82.722	0	323.31	25065000000	1878	30.6437	30.7311	30.7859	30.3269	30.6549	30.7596	30.5626	30.8102	-0.0749431	0.264499
Ribosomal protein S6 kinase alpha-3	RPS6KA3	P51812;B1AXG1;B1AXG2;D6R910;D6RHW7;D6RA62;V9GXZ1;E7ERL6;E7EWQ5;J3QT34;Q9Y2H9;Q6P0Q8-2;Q6P0Q8;O15021-2;O15021-3;O15021-1;O15021	P51812	adenyl nucleotide binding;adenyl ribonucleotide binding;ATP binding;binding;caspase inhibitor activity;caspase regulator activity;catalytic activity;cation binding;cysteine-type endopeptidase inhibitor activity;endopeptidase inhibitor activity;endopeptidase regulator activity;enzyme binding;enzyme inhibitor activity;enzyme regulator activity;ion binding;kinase activity;magnesium ion binding;metal…	DUF1908;PDZ;Pkinase;Pkinase_C	77	55	48	83.4	67.3	62	83.735	0	323.31	10534000000	965	29.4048	29.6187	29.5528	29.0309	29.4273	29.5482	29.5354	29.5966	-0.125059	0.404402
Ribosomal protein S6 kinase alpha-4;Ribosomal protein S6 kinase	RPS6KA4	O75676;E9PJN1;O75676-2;A0A0A6YYC0;E9PKU3	O75676;E9PJN1;O75676-2;A0A0A6YYC0	adenyl nucleotide binding;adenyl ribonucleotide binding;ATP binding;binding;catalytic activity;cation binding;enzyme binding;histone kinase activity;histone kinase activity (H3-S10 specific);histone serine kinase activity;ion binding;kinase activity;kinase binding;magnesium ion binding;metal ion binding;mitogen-activated protein kinase binding;mitogen-activated protein kinase p38 binding;nucleoti…	Pkinase;Pkinase_C	16	16	15	33.8	33.8	32.8	85.605	0	30.349	316410000	100	24.4262	24.6502	24.3922	24.0503	24.4944	24.3153	24.3859	24.428	-0.026165	0.0724026
Ribosomal protein S6 kinase;Ribosomal protein S6 kinase alpha-5	RPS6KA5	A0A0A0MQV2;O75582;O75582-2;O75582-3;G3V2D1;G3V4D7	A0A0A0MQV2;O75582;O75582-2;O75582-3	adenyl nucleotide binding;adenyl ribonucleotide binding;ATP binding;binding;catalytic activity;cation binding;histone kinase activity;histone kinase activity (H3-S10 specific);histone serine kinase activity;ion binding;kinase activity;magnesium ion binding;metal ion binding;nucleotide binding;phosphotransferase activity, alcohol group as acceptor;protein kinase activity;protein serine/threonine k…	Pkinase;Pkinase_C	6	5	5	16.1	15.1	15.1	90.507	0	57.984	101350000	45	22.8338	22.9835	22.8547	22.7744	22.8207	22.4544	22.8272	22.4245	0.229945	0.987692
40S ribosomal protein S7	RPS7	P62081;B5MCP9	P62081;B5MCP9	binding;nucleic acid binding;RNA binding;structural constituent of ribosome;structural molecule activity	Ribosomal_S7e	9	9	9	59.3	59.3	59.3	22.127	0	22.932	293240000	50	23.8535	24.0242	23.5303	24.6861	24.0636	23.7824	23.8113	23.7829	0.163494	0.266194
40S ribosomal protein S8	RPS8	Q5JR95;P62241	Q5JR95;P62241	structural constituent of ribosome;structural molecule activity	Ribosomal_S8e	7	7	7	44.1	44.1	44.1	21.879	0	57.885	367750000	108	24.3988	24.1853	24.2943	24.854	24.4309	24.2136	24.6354	24.2635	0.0472102	0.0988118
40S ribosomal protein S9	RPS9	P46781;B5MCT8;C9JM19;F2Z3C0;A8MXK4	P46781;B5MCT8;C9JM19	binding;nucleic acid binding;RNA binding;rRNA binding;structural constituent of ribosome;structural molecule activity;translation regulator activity	Ribosomal_S4;S4	11	11	11	37.1	37.1	37.1	22.591	0	18.078	463800000	58	24.854	24.8343	24.7323	24.7329	24.6148	24.7501	24.5849	24.6872	0.12912	1.40199
40S ribosomal protein SA	RPSA;RPSAP58	C9J9K3;P08865;A0A0C4DG17;A6NE09;C9JQR9	C9J9K3;P08865;A0A0C4DG17;A6NE09	binding;laminin receptor activity;receptor activity;ribonucleoprotein binding;ribosome binding;structural constituent of ribosome;structural molecule activity	Ribosomal_S2	9	9	9	53.4	53.4	53.4	29.505	0	69.219	220850000	92	24.243	23.2545	23.4227	24.7271	23.7884	22.6342	23.8707	23.4448	0.477297	0.485368
RuvB-like 1	RUVBL1	Q9Y265;H7C4G5;E7ETR0;Q9Y265-2;J3QLR1	Q9Y265;H7C4G5;E7ETR0;Q9Y265-2	5'-3' DNA helicase activity;adenyl nucleotide binding;adenyl ribonucleotide binding;ATP binding;ATPase activity;ATPase activity, coupled;ATP-dependent 5'-3' DNA helicase activity;ATP-dependent DNA helicase activity;ATP-dependent helicase activity;binding;catalytic activity;DNA helicase activity;DNA-dependent ATPase activity;helicase activity;hydrolase activity;hydrolase activity, acting on acid a…	TIP49	4	4	4	16.2	16.2	16.2	50.227	0	12.096	64268000	20	22.2382	NaN	21.6811	23.0237	NaN	NaN	21.2866	21.821	0.760496	0.594639
RuvB-like 2	RUVBL2	Q9Y230;Q9Y230-2;X6R2L4;M0R0Y3;M0R0Z0;M0QXI6;M0QXZ7	Q9Y230;Q9Y230-2;X6R2L4	5'-3' DNA helicase activity;adenyl nucleotide binding;adenyl ribonucleotide binding;ATP binding;ATPase activity;ATPase activity, coupled;ATP-dependent 5'-3' DNA helicase activity;ATP-dependent DNA helicase activity;ATP-dependent helicase activity;binding;catalytic activity;chromatin binding;chromatin DNA binding;core promoter binding;core promoter sequence-specific DNA binding;damaged DNA binding…	TIP49	9	9	9	32.4	32.4	32.4	51.156	0	40.29	67680000	33	22.1817	21.9576	22.4824	22.6289	NaN	NaN	22.3565	22.5408	-0.136001	0.22882
Protein S100-A11;Protein S100-A11, N-terminally processed	S100A11	P31949	P31949	binding;calcium ion binding;calcium-dependent protein binding;cation binding;identical protein binding;ion binding;metal ion binding;protein binding;protein dimerization activity;protein homodimerization activity	EF-hand_1;S_100	5	5	5	74.3	74.3	74.3	11.74	0	12.878	59952000	13	22.6036	NaN	21.1856	23.5673	21.8026	NaN	21.9052	21.599	0.683198	0.417007
Protein S100;Protein S100-A6	S100A6	R4GN98;P06703	R4GN98;P06703	binding;calcium ion binding;calcium-dependent protein binding;cation binding;cytoskeletal protein binding;identical protein binding;ion binding;ion transmembrane transporter activity;metal ion binding;protein binding;protein dimerization activity;protein homodimerization activity;substrate-specific transmembrane transporter activity;substrate-specific transporter activity;transition metal ion bin…	S_100	3	3	3	43.5	43.5	43.5	9.681	0	16.021	1185100000	46	26.2554	25.9841	25.0309	26.3809	26.7221	25.9973	25.3517	26.7928	-0.303174	0.274528
Sorting and assembly machinery component 50 homolog	SAMM50	Q9Y512	Q9Y512		Bac_surface_Ag	10	10	10	34.3	34.3	34.3	51.976	0	47.35	225130000	30	23.1743	23.8651	23.8055	22.7647	24.1006	23.7737	23.8855	23.5349	-0.421281	0.709792
Protein salvador homolog 1	SAV1	Q9H4B6;H0YJH0;G3V453;H0YJT4	Q9H4B6;H0YJH0		WW	11	11	11	50.1	50.1	50.1	44.633	0	53.951	242630000	63	24.0685	24.3474	24.1452	23.8478	23.9316	24.1371	23.9109	24.2329	0.0490761	0.143628
Protein transport protein Sec61 subunit beta	SEC61B	P60468	P60468	binding;epidermal growth factor binding;growth factor binding;hormone binding;protein binding	Sec61_beta	2	2	2	25	25	25	9.9743	0	33.729	159740000	23	23.4997	23.1423	23.2547	23.1461	23.3543	23.0825	23.2763	23.2744	0.0138364	0.0475029
Plasminogen activator inhibitor 1 RNA-binding protein	SERBP1	Q8NC51-4;Q8NC51-3;Q8NC51-2;Q8NC51	Q8NC51-4;Q8NC51-3;Q8NC51-2;Q8NC51	binding;mRNA 3'-UTR binding;mRNA binding;nucleic acid binding;RNA binding	HABP4_PAI-RBP1	2	2	2	11.6	11.6	11.6	42.426	0	55.436	270960000	26	24.0774	24.841	24.018	24.3986	23.9074	23.3177	23.8673	23.4025	0.710038	1.57493
Serpin B12	SERPINB12	Q96P63;Q96P63-2	Q96P63;Q96P63-2	binding;endopeptidase inhibitor activity;endopeptidase regulator activity;enzyme binding;enzyme inhibitor activity;enzyme regulator activity;peptidase inhibitor activity;peptidase regulator activity;protein binding;serine-type endopeptidase inhibitor activity	Serpin	5	5	5	23.7	23.7	23.7	46.276	0	11.466	21060000	22	NaN	21.282	NaN	21.7062	NaN	21.2999	NaN	NaN	0.194213	0
	SERPINB6	A0A024QZX5;A0A087X1N8	A0A024QZX5;A0A087X1N8		Serpin	6	6	0	27.6	27.6	0	43.024	0	5.9729	13557000	16	NaN	NaN	19.8055	20.263	20.6994	NaN	NaN	NaN	-0.66514	0
Serpin H1	SERPINH1	P50454;E9PKH2;E9PR70;E9PPV6;E9PK86;E9PMI5;E9PJH8;E9PIG2;E9PRS3;E9PNX1;H0YEP8;E9PLA6;E9PQ34	P50454;E9PKH2;E9PR70;E9PPV6	binding;collagen binding;endopeptidase inhibitor activity;endopeptidase regulator activity;enzyme inhibitor activity;enzyme regulator activity;peptidase inhibitor activity;peptidase regulator activity;protein binding;serine-type endopeptidase inhibitor activity	Serpin	7	7	7	26.6	26.6	26.6	46.44	0	44.157	95179000	57	22.7031	22.4785	21.5538	23.244	22.81	22.0256	22.3277	22.2654	0.137691	0.13348
Protein SET;Protein SETSIP	SET;SETSIP	A0A0C4DFV9;Q01105-3;Q01105-4;Q01105-2;Q01105;A0A087X027;P0DME0	A0A0C4DFV9;Q01105-3;Q01105-4;Q01105-2;Q01105;A0A087X027;P0DME0	binding;chromatin binding;DNA binding;enzyme inhibitor activity;enzyme regulator activity;histone binding;nucleic acid binding;phosphatase inhibitor activity;phosphatase regulator activity;protein binding;protein phosphatase inhibitor activity;protein phosphatase regulator activity;protein phosphatase type 2A regulator activity	NAP	4	4	4	23.7	23.7	23.7	31.124	0	41.999	152480000	23	23.6035	23.0083	22.7149	25.2602	22.6048	22.1469	23.2908	22.59	0.988616	0.797201
14-3-3 protein sigma	SFN	P31947;P31947-2	P31947;P31947-2	enzyme inhibitor activity;enzyme regulator activity;kinase inhibitor activity;kinase regulator activity;protein kinase C inhibitor activity;protein kinase inhibitor activity;protein kinase regulator activity;protein serine/threonine kinase inhibitor activity	14-3-3	11	9	9	60.5	57.3	57.3	27.774	0	30.045	163920000	44	23.4029	23.0689	23.1146	24.2777	22.9522	22.6349	23.6866	22.7012	0.472295	0.604497
Splicing factor, proline- and glutamine-rich	SFPQ	P23246;P23246-2;H0Y9K7	P23246;P23246-2	binding;core promoter binding;DNA binding;enzyme binding;histone deacetylase binding;nucleic acid binding;nucleotide binding;protein binding;regulatory region DNA binding;regulatory region nucleic acid binding;sequence-specific DNA binding;transcription regulatory region DNA binding;transcription regulatory region sequence-specific DNA binding	NOPS;RRM_1	10	10	10	19.9	19.9	19.9	76.149	0	53.513	199750000	64	23.0474	24.8391	23.2112	24.1416	23.5265	22.7321	22.5846	22.3377	1.0146	1.07233
Sideroflexin-1	SFXN1	Q9H9B4;D6RDG7;S4R2X2;D6RFI0;D6RAE9;A0A0A0MS41;Q9BWM7	Q9H9B4;D6RDG7;S4R2X2;D6RFI0	ion transmembrane transporter activity;substrate-specific transmembrane transporter activity;substrate-specific transporter activity;transmembrane transporter activity;transporter activity	Mtc	7	7	7	32	32	32	35.619	0	7.9717	55348000	20	NaN	21.9026	21.7632	22.3799	22.1784	22.0823	22.8455	22.0999	-0.286292	0.479064
Serine hydroxymethyltransferase, mitochondrial;Serine hydroxymethyltransferase	SHMT2	P34897-3;P34897;P34897-2;G3V5L0;G3V2Y4;G3V4W5;G3V540;H0YIZ0;G3V241;G3V3Y8;G3V4T0;G3V4X0;G3V2W0;G3V2E4;G3V2D2	P34897-3;P34897;P34897-2;G3V5L0;G3V2Y4;G3V4W5	aldehyde-lyase activity;amine binding;amino acid binding;binding;carbon-carbon lyase activity;carboxylic acid binding;catalytic activity;chromatin binding;cofactor binding;glycine hydroxymethyltransferase activity;hydroxymethyl-, formyl- and related transferase activity;L-allo-threonine aldolase activity;lyase activity;pyridoxal phosphate binding;threonine aldolase activity;transferase activity;t…	SHMT	10	10	10	34.2	34.2	34.2	53.454	0	18.003	52607000	17	21.9468	21.1868	21.2641	23.5492	21.6914	NaN	21.7807	21.306	0.394033	0.239249
Serine/threonine-protein kinase SIK2	SIK2	Q9H0K1;A0A0B4J2F2;P57059	Q9H0K1	14-3-3 protein binding;adenyl nucleotide binding;adenyl ribonucleotide binding;ATP binding;binding;cAMP response element binding protein binding;catalytic activity;cation binding;enzyme binding;ion binding;kinase activity;kinase binding;magnesium ion binding;metal ion binding;nucleotide binding;phosphotransferase activity, alcohol group as acceptor;protein binding;protein binding transcription fa…	Pkinase	22	22	22	38.6	38.6	38.6	103.91	0	97.533	437010000	136	25.0012	25.1126	24.9676	24.6877	24.8979	24.9363	24.6262	24.9565	0.0880661	0.313295
S-phase kinase-associated protein 1	SKP1	E7ERH2;F8W8N3;P63208-2;P63208;E5RJR5;E5RGM3;E5RHM3;E5RGM4	E7ERH2;F8W8N3;P63208-2;P63208;E5RJR5;E5RGM3	acid-amino acid ligase activity;catalytic activity;ligase activity;ligase activity, forming carbon-nitrogen bonds;small conjugating protein ligase activity;ubiquitin-protein ligase activity	Skp1;Skp1_POZ	4	4	2	51.4	51.4	19	16.034	0	20.971	107610000	95	22.7337	22.5719	22.5843	23.1348	22.734	22.2822	22.7102	22.562	0.184066	0.503119
Monocarboxylate transporter 1	SLC16A1	P53985;Q5T8R3;Q5T8R5;P53985-2	P53985	active transmembrane transporter activity;carboxylic acid transmembrane transporter activity;lactate transmembrane transporter activity;mevalonate transmembrane transporter activity;monocarboxylic acid transmembrane transporter activity;organic acid transmembrane transporter activity;secondary active monocarboxylate transmembrane transporter activity;secondary active transmembrane transporter act…	MFS_1	6	6	6	11.8	11.8	11.8	53.944	0	27.014	352120000	52	23.96	24.385	24.6455	23.9508	24.463	24.2122	24.4442	24.4808	-0.164701	0.398935
Amino acid transporter;Neutral amino acid transporter B(0)	SLC1A5	M0QXM4;Q15758-3;Q15758-2;Q15758	M0QXM4;Q15758-3;Q15758-2;Q15758	active transmembrane transporter activity;amine transmembrane transporter activity;amino acid transmembrane transporter activity;anion transmembrane transporter activity;anion:cation symporter activity;carboxylic acid transmembrane transporter activity;cation transmembrane transporter activity;dicarboxylic acid transmembrane transporter activity;inorganic cation transmembrane transporter activity…	SDF	2	2	2	9.6	9.6	9.6	39.443	0	14.535	97588000	43	22.5746	22.6141	22.4775	22.5761	22.7096	22.9602	22.4464	22.7567	-0.15765	0.697968
Tricarboxylate transport protein, mitochondrial	SLC25A1	P53007;B4DP62	P53007;B4DP62	carboxylic acid transmembrane transporter activity;citrate transmembrane transporter activity;organic acid transmembrane transporter activity;substrate-specific transmembrane transporter activity;substrate-specific transporter activity;transmembrane transporter activity;transporter activity;tricarboxylic acid transmembrane transporter activity	Mito_carr	8	8	8	41.5	41.5	41.5	34.012	0	18.815	147710000	68	22.8274	23.1296	22.9287	22.2761	23.3342	23.1359	23.5698	23.3603	-0.559573	1.48123
Mitochondrial dicarboxylate carrier	SLC25A10	B4DLN1;Q9UBX3;Q9UBX3-2;F6RGN5;I3L1E8;P52815	B4DLN1;Q9UBX3;Q9UBX3-2;F6RGN5;I3L1E8	binding;carboxylic acid transmembrane transporter activity;dicarboxylic acid transmembrane transporter activity;nucleic acid binding;organic acid transmembrane transporter activity;RNA binding;structural constituent of ribosome;structural molecule activity;substrate-specific transmembrane transporter activity;substrate-specific transporter activity;transmembrane transporter activity;transporter a…	Mito_carr;Ribosomal_L12	10	10	10	31	31	31	48.099	0	64.403	413360000	126	24.3053	24.3355	24.6488	23.7763	24.4791	24.6426	25.0449	24.8999	-0.500185	1.19213
Mitochondrial 2-oxoglutarate/malate carrier protein	SLC25A11	Q02978;I3L1P8;Q02978-2	Q02978;I3L1P8;Q02978-2	active transmembrane transporter activity;anion transmembrane transporter activity;anion:anion antiporter activity;antiporter activity;C4-dicarboxylate transmembrane transporter activity;carboxylic acid transmembrane transporter activity;dicarboxylic acid transmembrane transporter activity;ion transmembrane transporter activity;malate transmembrane transporter activity;organic acid transmembrane …	Mito_carr	12	12	12	58	58	58	34.061	0	50.094	527450000	156	24.8543	24.8979	24.74	24.5109	25.0137	24.8845	25.439	25.1382	-0.36807	1.33587
Calcium-binding mitochondrial carrier protein Aralar2	SLC25A13	Q9UJS0;Q9UJS0-2	Q9UJS0;Q9UJS0-2	acidic amino acid transmembrane transporter activity;active transmembrane transporter activity;amine transmembrane transporter activity;amino acid transmembrane transporter activity;binding;calcium ion binding;carboxylic acid transmembrane transporter activity;cation binding;ion binding;L-amino acid transmembrane transporter activity;L-aspartate transmembrane transporter activity;L-glutamate tran…	EF-hand_6;Mito_carr	13	13	10	35.3	35.3	29.5	74.175	0	29.893	260330000	80	23.8445	24.0377	23.8493	23.4875	23.8044	23.7989	24.0802	23.6758	-0.0350585	0.0889714
Mitochondrial glutamate carrier 1	SLC25A22	A0A0D9SFE1;Q9H936;K4DIB8;K4DIA8;A0A0D9SEI9;E9PJH7;A0A0D9SFA8;K4DIB0;K4DIA2;A0A0D9SG84;E9PI74;E9PQ36;K4DIB6;K4DIB3;E9PS95;K4DIB4;E9PJY0;A0A0A6YYN8	A0A0D9SFE1;Q9H936;K4DIB8;K4DIA8;A0A0D9SEI9;E9PJH7;A0A0D9SFA8;K4DIB0;K4DIA2;A0A0D9SG84;E9PI74;E9PQ36;K4DIB6;K4DIB3;E9PS95	acidic amino acid transmembrane transporter activity;active transmembrane transporter activity;amine transmembrane transporter activity;amino acid transmembrane transporter activity;carboxylic acid transmembrane transporter activity;L-amino acid transmembrane transporter activity;L-glutamate transmembrane transporter activity;organic acid transmembrane transporter activity;secondary active transm…	Mito_carr	4	4	4	40.5	40.5	40.5	26.214	0	35.447	55480000	22	21.9807	22.9804	NaN	NaN	NaN	NaN	22.9735	NaN	-0.492959	0
Calcium-binding mitochondrial carrier protein SCaMC-1	SLC25A24	Q6NUK1-2;Q6NUK1	Q6NUK1-2;Q6NUK1	adenine nucleotide transmembrane transporter activity;ATP transmembrane transporter activity;binding;calcium ion binding;cation binding;ion binding;metal ion binding;nucleobase-containing compound transmembrane transporter activity;nucleotide transmembrane transporter activity;purine nucleotide transmembrane transporter activity;substrate-specific transmembrane transporter activity;substrate-spec…	EF-hand_7;Mito_carr	12	12	12	41.7	41.7	41.7	51.354	0	59.956	499990000	122	24.7623	24.8847	24.6917	24.4335	24.8525	24.5244	25.1728	24.816	-0.148368	0.399501
Phosphate carrier protein, mitochondrial	SLC25A3	Q00325-2;F8VVM2;Q00325;F8VWQ0;F8VZL5;F8VWR4	Q00325-2;F8VVM2;Q00325	active transmembrane transporter activity;anion transmembrane transporter activity;binding;inorganic anion transmembrane transporter activity;ion transmembrane transporter activity;phosphate ion carrier activity;phosphate ion transmembrane transporter activity;protein binding;protein complex binding;secondary active transmembrane transporter activity;substrate-specific transmembrane transporter a…	Mito_carr	10	10	10	33.8	33.8	33.8	39.958	0	54.147	1807600000	109	26.3752	26.6962	26.5561	26.3587	26.7909	26.5813	26.8641	26.8088	-0.264744	1.39823
ADP/ATP translocase 1	SLC25A4	P12235;V9GYG0	P12235;V9GYG0	adenine transmembrane transporter activity;nucleobase transmembrane transporter activity;nucleobase-containing compound transmembrane transporter activity;purine base transmembrane transporter activity;substrate-specific transmembrane transporter activity;substrate-specific transporter activity;transmembrane transporter activity;transporter activity	Mito_carr	21	4	4	60.7	18.8	18.8	33.064	0	13.227	133040000	36	23.17	22.4969	NaN	22.0739	23.4992	23.0559	23.3601	23.5436	-0.784464	1.33764
ADP/ATP translocase 2;ADP/ATP translocase 2, N-terminally processed	SLC25A5	P05141;Q9H0C2	P05141	adenine transmembrane transporter activity;binding;enzyme binding;nucleobase transmembrane transporter activity;nucleobase-containing compound transmembrane transporter activity;protein binding;purine base transmembrane transporter activity;substrate-specific transmembrane transporter activity;substrate-specific transporter activity;transmembrane transporter activity;transporter activity;ubiquiti…	Mito_carr	40	40	20	81.9	81.9	57.7	32.852	0	164.33	7251400000	574	28.5297	28.6544	28.63	28.3348	28.7651	28.5886	28.9631	28.8425	-0.252611	1.25085
ADP/ATP translocase 3;ADP/ATP translocase 3, N-terminally processed	SLC25A6	P12236	P12236	active transmembrane transporter activity;antiporter activity;ATP:ADP antiporter activity;secondary active transmembrane transporter activity;solute:solute antiporter activity;transmembrane transporter activity;transporter activity	Mito_carr	38	19	15	86.9	65.4	47.7	32.866	0	108.09	2094300000	364	26.6645	26.6323	26.714	26.4624	27.0191	26.5509	27.3313	27.11	-0.384543	1.16678
Large neutral amino acids transporter small subunit 1	SLC7A5	Q01650	Q01650	active transmembrane transporter activity;amine transmembrane transporter activity;amino acid transmembrane transporter activity;antigen binding;antiporter activity;aromatic amino acid transmembrane transporter activity;binding;carboxylic acid transmembrane transporter activity;L-amino acid transmembrane transporter activity;L-leucine transmembrane transporter activity;L-phenylalanine transmembra…	AA_permease_2	3	3	3	7.1	7.1	7.1	55.01	0	8.3048	112780000	24	21.8767	22.9323	22.4228	22.3761	22.8011	22.6448	23.4103	23.0048	-0.563295	1.07704
STE20-like serine/threonine-protein kinase	SLK	Q9H2G2;Q9H2G2-2	Q9H2G2;Q9H2G2-2	adenyl nucleotide binding;adenyl ribonucleotide binding;ATP binding;binding;catalytic activity;identical protein binding;kinase activity;nucleotide binding;phosphotransferase activity, alcohol group as acceptor;protein binding;protein dimerization activity;protein homodimerization activity;protein kinase activity;protein serine/threonine kinase activity;purine nucleotide binding;purine ribonucleo…	Pkinase;PKK	90	90	87	73.4	73.4	72.5	142.69	0	323.31	8860900000	1120	29.2061	29.4343	29.4306	29.0002	29.373	29.3326	29.147	29.3596	-0.0352516	0.1121
Survival motor neuron protein	SMN1;SMN2	E7EQZ4;Q16637-4;Q16637-2;Q16637-3;Q16637;H0YBZ9;A0A0G2JRX5;A0A0G2JRY6;B4DP61	E7EQZ4;Q16637-4;Q16637-2;Q16637-3;Q16637;H0YBZ9;A0A0G2JRX5;A0A0G2JRY6;B4DP61	binding;identical protein binding;nucleic acid binding;protein binding;RNA binding	SMN	2	2	2	9.5	9.5	9.5	31.689	0.0015106	2.1266	34610000	14	21.6883	21.4814	NaN	21.3951	21.6268	20.9702	21.4987	21.5919	0.0997194	0.199985
Small nuclear ribonucleoprotein Sm D1	SNRPD1	P62314;J3QLI9;J3QLR7	P62314;J3QLI9	binding;nucleic acid binding;RNA binding	LSM	3	3	3	41.2	41.2	41.2	13.281	0	16.395	90699000	60	22.2836	22.1918	22.0079	23.1851	22.5001	22.3164	22.2435	22.1976	0.10267	0.144186
Small nuclear ribonucleoprotein Sm D2	SNRPD2	P62316-2;P62316;K7EJB5;K7ERG4	P62316-2;P62316		LSM	3	3	3	44.4	44.4	44.4	12.398	0	3.9997	91144000	19	22.4761	22.4908	NaN	23.1176	22.8123	22.2382	NaN	22.2826	0.250451	0.374203
Small nuclear ribonucleoprotein Sm D3	SNRPD3	P62318-2;P62318;H3BT13	P62318-2;P62318	binding;enzyme binding;histone pre-mRNA DCP binding;nucleic acid binding;protein binding;RNA binding	LSM	5	5	5	55.8	55.8	55.8	13.291	0	25.99	94040000	55	22.2867	22.4736	22.0611	22.7419	22.4781	21.9534	21.9833	22.3525	0.199034	0.459005
Small nuclear ribonucleoprotein E	SNRPE	P62304;A6NHK2	P62304;A6NHK2	binding;nucleic acid binding;RNA binding	LSM	2	2	2	39.1	39.1	39.1	10.803	0	5.5392	44358000	16	22.5112	20.9193	21.5811	NaN	NaN	NaN	NaN	21.6926	-0.022047	0
Small nuclear ribonucleoprotein F	SNRPF	P62306	P62306	binding;nucleic acid binding;RNA binding	LSM	3	3	3	65.1	65.1	65.1	9.7251	0	3.7213	29371000	17	21.0196	21.4132	NaN	21.5203	21.5301	NaN	NaN	20.9433	0.0809631	0.0964245
Sterol O-acyltransferase 1	SOAT1	P35610;B1APM4;P35610-3;P35610-2	P35610;B1APM4;P35610-3;P35610-2	binding;carboxylic acid binding;catalytic activity;cholesterol binding;cholesterol O-acyltransferase activity;coenzyme binding;cofactor binding;fatty acid binding;fatty-acyl-CoA binding;lipid binding;monocarboxylic acid binding;O-acyltransferase activity;steroid binding;sterol binding;sterol O-acyltransferase activity;transferase activity;transferase activity, transferring acyl groups;transferase…	MBOAT	15	15	15	29.1	29.1	29.1	64.734	0	264.92	8937600000	388	28.7292	28.9679	28.979	28.7586	29.1701	28.7268	28.8813	29.0395	-0.0957446	0.352414
Superoxide dismutase [Cu-Zn]	SOD1	P00441;H7BYH4	P00441;H7BYH4	antioxidant activity;binding;catalytic activity;cation binding;chaperone binding;copper ion binding;enzyme binding;GTPase binding;identical protein binding;ion binding;metal ion binding;oxidoreductase activity;oxidoreductase activity, acting on superoxide radicals as acceptor;phosphatase binding;protein binding;protein dimerization activity;protein homodimerization activity;protein phosphatase 2B…	Sod_Cu	7	7	7	59.7	59.7	59.7	15.936	0	22.604	118140000	21	22.9656	NaN	22.5078	24.5196	NaN	NaN	23.1896	NaN	0.141443	0
Sepiapterin reductase	SPR	P35270;REV__Q16649	P35270	aldo-keto reductase (NADP) activity;binding;catalytic activity;coenzyme binding;cofactor binding;NADP binding;nucleotide binding;oxidoreductase activity;oxidoreductase activity, acting on CH-OH group of donors;oxidoreductase activity, acting on the CH-OH group of donors, NAD or NADP as acceptor;sepiapterin reductase activity	adh_short	12	12	12	58.2	58.2	58.2	28.048	0	36.97	113150000	46	22.6828	21.5152	21.6615	25.6745	21.8307	NaN	20.5834	20.2302	2.00205	0.796642
Proto-oncogene tyrosine-protein kinase Src	SRC	P12931;P12931-2;H2E272;H7C3Z8;H7C074;Q9H3Y6	P12931;P12931-2	adenyl nucleotide binding;adenyl ribonucleotide binding;ATP binding;binding;binding, bridging;catalytic activity;cation binding;enzyme binding;ephrin receptor binding;growth factor receptor binding;heme binding;hormone receptor binding;integrin binding;ion binding;ion channel binding;iron ion binding;kinase activity;metal ion binding;non-membrane spanning protein tyrosine kinase activity;nucleoti…	Pkinase_Tyr;SH2;SH3_1;SH3_9	53	52	38	84	84	76.5	59.834	0	323.31	17460000000	1304	30.2665	30.1777	30.1593	29.7994	30.0952	30.2208	29.9443	30.1588	-0.00405455	0.0114772
Signal recognition particle 14 kDa protein	SRP14	H0YLA2;P37108	H0YLA2;P37108	7S RNA binding;binding;endoplasmic reticulum signal peptide binding;nucleic acid binding;peptide binding;RNA binding;signal sequence binding	SRP14	4	4	4	36.5	36.5	36.5	13.058	0	7.9598	148150000	45	23.0457	22.8172	22.8391	23.4395	23.2801	23.1893	22.8012	23.1291	-0.064568	0.137164
Signal recognition particle 9 kDa protein	SRP9	P49458;E9PE20;P49458-2	P49458;E9PE20;P49458-2	7S RNA binding;binding;nucleic acid binding;ribonucleoprotein binding;RNA binding;signal recognition particle binding		4	4	4	57	57	57	10.112	0	10.35	160370000	40	23.2498	23.3549	23.4485	23.0726	23.324	23.7165	23.3099	23.2547	-0.119844	0.394569
Serine/arginine repetitive matrix protein 2	SRRM2	Q9UQ35;Q9UQ35-2;I3L1C0;A0A087X1W1;I3L1I8;I3L182;I3L4D8;Q9UQ35-3	Q9UQ35	binding;C2H2 zinc finger domain binding;protein binding;protein domain specific binding;protein N-terminus binding	cwf21	5	5	5	4.1	4.1	4.1	299.61	0	21.942	47830000	25	21.7737	21.557	NaN	21.7986	NaN	21.8405	21.8342	21.8612	-0.135521	0.813006
Serine/arginine-rich splicing factor 11	SRSF11	Q5T760;Q05519-2;Q05519;B4DWT1;Q5T757	Q5T760;Q05519-2;Q05519	binding;nucleic acid binding;nucleotide binding	RRM_1	3	3	3	11.8	11.8	11.8	42.316	0	7.2337	40372000	38	21.6867	22.1934	21.3103	21.3229	21.1497	NaN	NaN	21.8388	0.134088	0.131064
Lupus La protein	SSB	P05455;E7ERC4;E9PGX9;E9PFL9	P05455;E7ERC4;E9PGX9	binding;mRNA binding;nucleic acid binding;nucleotide binding;RNA binding;tRNA binding	La;RRM_1;RRM_3	7	7	7	21.1	21.1	21.1	46.836	0	8.9512	38738000	21	22.2098	NaN	NaN	23.1909	NaN	NaN	21.9783	NaN	0.722084	0
Single-stranded DNA-binding protein, mitochondrial	SSBP1	Q04837;A0A0G2JLD8;E7EUY5;C9K0U8	Q04837;A0A0G2JLD8;E7EUY5;C9K0U8	binding;chromatin binding;DNA binding;nucleic acid binding;single-stranded DNA binding;structure-specific DNA binding	SSB	7	7	7	58.8	58.8	58.8	17.259	0	16.74	90833000	28	22.4243	22.363	NaN	23.1789	22.2229	22.205	22.3278	NaN	0.403474	0.693151
FACT complex subunit SSRP1	SSRP1	Q08945;E9PPZ7;E9PMD4	Q08945	binding;chromatin binding;DNA binding;nucleic acid binding	HMG_box;Rtt106;SSrecog	17	17	17	33.3	33.3	33.3	81.074	0	44.531	461920000	162	24.3509	24.9839	24.7109	24.4832	24.5769	25.1412	24.9174	24.699	-0.20139	0.492944
Stromal interaction molecule 2	STIM2	H0Y860;Q9P246;Q9P246-2;H7C5A5;Q9P246-3;H7C5K2;R4GN82;R4GMP0;H7C5C6;H0YDB2;E9PNJ4;G0XQ39;Q13586-2;Q13586	H0Y860;Q9P246;Q9P246-2;H7C5A5;Q9P246-3;H7C5K2	binding;calcium channel activity;calcium channel regulator activity;calcium ion binding;cation binding;cation channel activity;cation transmembrane transporter activity;channel activity;channel regulator activity;cytoskeletal protein binding;gated channel activity;identical protein binding;ion binding;ion channel activity;ion transmembrane transporter activity;ligand-gated channel activity;ligand…	SAM_2	4	4	4	10.9	10.9	10.9	84.798	0	10.531	51579000	25	22.1825	22.0649	21.8052	21.6985	22.261	NaN	22.1161	21.8865	-0.150115	0.404539
Stress-induced-phosphoprotein 1	STIP1	P31948;P31948-2;P31948-3;F5GXD8;F5H783;H0YGI8	P31948;P31948-2;P31948-3		TPR_1;TPR_8	10	10	10	27.6	27.6	27.6	62.639	0	8.855	104870000	32	23.1323	21.8129	21.364	24.6434	22.3719	21.0022	22.7282	21.8408	0.752353	0.399753
Serine/threonine-protein kinase 10	STK10	O94804;H0YB71	O94804	adenyl nucleotide binding;adenyl ribonucleotide binding;ATP binding;binding;catalytic activity;identical protein binding;kinase activity;molecular transducer activity;nucleotide binding;phosphotransferase activity, alcohol group as acceptor;polo kinase kinase activity;protein binding;protein dimerization activity;protein homodimerization activity;protein kinase activity;protein serine/threonine k…	Pkinase;PKK	45	42	42	50.4	49.1	49.1	112.13	0	270.61	2233500000	386	27.9286	26.9728	27.4767	27.1198	26.9202	27.2473	27.2995	26.7868	0.311012	0.59479
Serine/threonine-protein kinase 24;Serine/threonine-protein kinase 24 36 kDa subunit;Serine/threonine-protein kinase 24 12 kDa subunit	STK24	B4DR80;Q9Y6E0-2;Q9Y6E0;H0Y630;Q5JV98;Q5JV99	B4DR80;Q9Y6E0-2;Q9Y6E0;H0Y630	adenyl nucleotide binding;adenyl ribonucleotide binding;ATP binding;binding;catalytic activity;cation binding;ion binding;kinase activity;metal ion binding;nucleotide binding;phosphotransferase activity, alcohol group as acceptor;protein kinase activity;protein serine/threonine kinase activity;purine nucleotide binding;purine ribonucleoside triphosphate binding;purine ribonucleotide binding;ribon…	Pkinase	15	15	10	58.5	58.5	46.1	45.835	0	35.272	491540000	167	24.724	24.9602	24.8408	24.8616	24.8452	24.7289	24.8388	24.9322	0.0103574	0.0572144
Serine/threonine-protein kinase 26	STK26	Q8NBY1;B4E0Y9;Q9P289;Q9P289-2;Q9P289-3	Q8NBY1;B4E0Y9;Q9P289;Q9P289-2;Q9P289-3	adenyl nucleotide binding;adenyl ribonucleotide binding;ATP binding;binding;catalytic activity;cation binding;identical protein binding;ion binding;kinase activity;magnesium ion binding;metal ion binding;nucleotide binding;phosphotransferase activity, alcohol group as acceptor;protein binding;protein dimerization activity;protein homodimerization activity;protein kinase activity;protein serine/th…	Pkinase	11	7	5	41.3	32.7	25.5	43.867	0	16.49	83582000	68	22.1889	22.55	22.2734	22.3656	22.2154	22.5023	22.6038	22.2391	-0.0456905	0.139972
Serine/threonine-protein kinase 3;Serine/threonine-protein kinase 3 36kDa subunit;Serine/threonine-protein kinase 3 20kDa subunit	STK3	Q13188;Q13188-2;A0A087WZ06;E5RFQ9;Q8NBU1;E5RIM6	Q13188;Q13188-2;A0A087WZ06	adenyl nucleotide binding;adenyl ribonucleotide binding;ATP binding;binding;catalytic activity;cation binding;enzyme activator activity;enzyme regulator activity;ion binding;kinase activator activity;kinase activity;kinase regulator activity;magnesium ion binding;MAP kinase kinase kinase activity;metal ion binding;molecular transducer activity;nucleotide binding;phosphotransferase activity, alcoh…	Mst1_SARAH;Pkinase	33	21	21	62.3	46.8	46.8	56.3	0	105.79	2162400000	331	27.1306	27.2479	27.2	27.0262	27.2859	27.139	27.0694	27.2266	-0.0290575	0.165584
Serine/threonine-protein kinase 33	STK33	Q9BYT3;Q9BYT3-2;C9JCS6;C9J8B1	Q9BYT3;Q9BYT3-2	adenyl nucleotide binding;adenyl ribonucleotide binding;ATP binding;binding;catalytic activity;kinase activity;nucleotide binding;phosphotransferase activity, alcohol group as acceptor;protein kinase activity;protein serine/threonine kinase activity;purine nucleotide binding;purine ribonucleoside triphosphate binding;purine ribonucleotide binding;ribonucleotide binding;transferase activity;transf…	Pkinase	12	12	1	34.4	34.4	5.4	57.83	0	93.774	323440000	100	24.7754	24.5453	24.4412	24.2471	24.6859	24.5262	24.2064	24.5548	0.00896835	0.0203465
Serine/threonine-protein kinase 38	STK38	Q15208;H0YGN4	Q15208	adenyl nucleotide binding;adenyl ribonucleotide binding;ATP binding;binding;catalytic activity;cation binding;enzyme binding;ion binding;kinase activity;kinase binding;magnesium ion binding;metal ion binding;mitogen-activated protein kinase kinase kinase binding;nucleotide binding;phosphotransferase activity, alcohol group as acceptor;protein binding;protein kinase activity;protein kinase binding…	Pkinase;Pkinase_C	20	20	16	52.3	52.3	47.7	54.19	0	89.344	946330000	158	25.9695	26.2812	26.0483	25.8252	25.8663	25.9535	26.2306	25.9539	0.0299597	0.087748
Serine/threonine-protein kinase 38-like	STK38L	Q9Y2H1;F5GY51;F5H277;Q9Y2H1-2;F5H7Z3;I3L0D0;F5H5E6;F5H0V1	Q9Y2H1;F5GY51;F5H277;Q9Y2H1-2	adenyl nucleotide binding;adenyl ribonucleotide binding;ATP binding;binding;catalytic activity;cation binding;ion binding;kinase activity;magnesium ion binding;metal ion binding;nucleotide binding;phosphotransferase activity, alcohol group as acceptor;protein kinase activity;protein serine/threonine kinase activity;purine nucleotide binding;purine ribonucleoside triphosphate binding;purine ribonu…	Pkinase;Pkinase_C	14	10	10	40.1	33.2	33.2	54.002	0	19.442	94388000	41	22.2081	22.7975	22.4745	22.3609	22.9262	22.7691	22.464	23.1118	-0.357558	0.990338
Serine/threonine-protein kinase 4;Serine/threonine-protein kinase 4 37kDa subunit;Serine/threonine-protein kinase 4 18kDa subunit	STK4	Q13043;F5H5B4;Q13043-2;A0A087WVN8;A0A087WYT4	Q13043;F5H5B4;Q13043-2	adenyl nucleotide binding;adenyl ribonucleotide binding;ATP binding;binding;catalytic activity;cation binding;enzyme activator activity;enzyme regulator activity;identical protein binding;ion binding;kinase activator activity;kinase activity;kinase regulator activity;magnesium ion binding;MAP kinase kinase kinase activity;metal ion binding;molecular transducer activity;nucleotide binding;phosphot…	Mst1_SARAH;Pkinase	43	43	31	75.8	75.8	60.6	55.63	0	323.31	10504000000	900	29.4728	29.4022	29.5385	29.1454	29.4486	29.3802	29.1426	29.4069	0.0451217	0.157162
Stathmin	STMN1	P16949;P16949-2;A2A2D0	P16949;P16949-2;A2A2D0	binding;cytoskeletal protein binding;molecular transducer activity;protein binding;signal transducer activity;tubulin binding	Stathmin	4	4	3	33.6	33.6	27.5	17.302	0	4.6207	94583000	23	22.7643	NaN	21.7172	23.752	21.8259	NaN	22.2734	21.9125	0.740519	0.542245
Erythrocyte band 7 integral membrane protein	STOM	P27105;P27105-2;F8VSL7	P27105	binding;enzyme binding;protein binding;RNA polymerase binding	Band_7	11	11	11	48.3	48.3	48.3	31.73	0	35.447	972320000	205	25.6074	25.6116	25.7476	25.3092	26.0331	25.9726	25.9517	25.9679	-0.412355	2.32975
Stomatin-like protein 2, mitochondrial	STOML2	Q9UJZ1;A0A087WYB4;Q9UJZ1-2;F2Z2I8	Q9UJZ1;A0A087WYB4;Q9UJZ1-2	binding;enzyme binding;GTPase binding;protein binding;receptor binding	Band_7	41	41	41	87.1	87.1	87.1	38.534	0	323.31	19950000000	1698	29.8773	30.1791	30.0716	29.7902	30.0211	30.0407	30.025	30.073	-0.0604215	0.279735
Serine-threonine kinase receptor-associated protein	STRAP	Q9Y3F4;Q9Y3F4-2;H0YH33	Q9Y3F4;Q9Y3F4-2		WD40	5	5	5	25.4	25.4	25.4	38.438	0	10.734	48498000	24	22.2653	NaN	NaN	22.1859	21.9703	22.1847	22.1038	NaN	0.139395	0.69187
Dolichyl-diphosphooligosaccharide--protein glycosyltransferase subunit STT3A	STT3A	P46977-2;P46977	P46977-2;P46977	catalytic activity;dolichyl-diphosphooligosaccharide-protein glycotransferase activity;oligosaccharyl transferase activity;transferase activity;transferase activity, transferring glycosyl groups;transferase activity, transferring hexosyl groups	STT3	6	6	6	12.9	12.9	12.9	69.588	0	85.063	917470000	138	25.8604	25.8751	26.0941	25.7068	25.3716	25.69	25.7475	25.8439	0.220855	0.8558
Activated RNA polymerase II transcriptional coactivator p15	SUB1	P53999	P53999	binding;DNA binding;nucleic acid binding;protein binding transcription factor activity;single-stranded DNA binding;structure-specific DNA binding;transcription coactivator activity;transcription cofactor activity;transcription factor binding transcription factor activity	PC4	8	8	8	56.7	56.7	56.7	14.395	0	17.344	319660000	41	22.9471	25.932	24.5321	24.0796	23.8638	23.4973	23.277	24.1185	0.683556	0.481194
SUN domain-containing protein 2	SUN2	Q9UH99;Q9UH99-2;Q9UH99-3;B0QY60	Q9UH99;Q9UH99-2;Q9UH99-3	binding;cytoskeletal protein binding;identical protein binding;lamin binding;microtubule binding;protein binding;tubulin binding	Sad1_UNC	15	15	15	32.5	32.5	32.5	80.31	0	72.715	399390000	134	23.8337	24.6127	24.5325	24.1064	24.8927	24.3974	24.5244	24.7178	-0.361748	0.851856
FACT complex subunit SPT16	SUPT16H	Q9Y5B9;G3V5A4;G3V401;G3V2X0	Q9Y5B9		FACT-Spt16_Nlob;Peptidase_M24;Rtt106;SPT16	26	26	26	34.4	34.4	34.4	119.91	0	181.19	949430000	281	25.4992	25.8974	25.6794	25.5046	25.3994	26.1235	25.7438	25.5915	-0.0693583	0.146809
Surfeit locus protein 4	SURF4	O15260;Q5T8U5;O15260-2;B7Z1G8;O15260-3	O15260;Q5T8U5;O15260-2;B7Z1G8		SURF4	5	5	5	26.8	26.8	26.8	30.394	0	35.3	612500000	88	24.5889	25.0319	24.8077	24.469	25.0552	24.7745	25.0632	24.9335	-0.232228	0.819376
Tyrosine-protein kinase SYK	SYK	P43405;P43405-2	P43405;P43405-2	adenyl nucleotide binding;adenyl ribonucleotide binding;ATP binding;binding;catalytic activity;integrin binding;kinase activity;molecular transducer activity;non-membrane spanning protein tyrosine kinase activity;nucleotide binding;phosphotransferase activity, alcohol group as acceptor;protein binding;protein complex binding;protein kinase activity;protein serine/threonine kinase activity;protein…	Pkinase_Tyr;SH2	23	23	23	59.5	59.5	59.5	72.065	0	97.831	577440000	201	25.2459	25.166	25.3828	24.8768	25.2481	24.9172	25.0062	25.1356	0.0910945	0.29485
Heterogeneous nuclear ribonucleoprotein Q	SYNCRIP	B7Z645;O60506-3;O60506;O60506-5;O60506-4;O60506-2;F6UXX1;O43390-4;O43390;O43390-2	B7Z645;O60506-3;O60506;O60506-5;O60506-4;O60506-2	binding;mRNA binding;nucleic acid binding;nucleotide binding;poly(A) RNA binding;poly-purine tract binding;RNA binding;single-stranded RNA binding	RRM_1	4	4	4	15.3	15.3	15.3	52.046	0	6.8468	43009000	11	21.6764	21.9658	NaN	22.1536	NaN	21.7234	21.8966	NaN	0.121935	0.245948
[truncated: 92 more rows]

## Sheet: 3
Protein names	Gene names	Protein IDs	Majority protein IDs	GOMF name	Pfam	Peptides	Razor + unique peptides	Unique peptides	Sequence coverage [%]	Unique + razor sequence coverage [%]	Unique sequence coverage [%]	Mol. weight [kDa]	Q-value	Score	Intensity	MS/MS count	LFQ intensity DMSO Replicate 1	LFQ intensity DMSO Replicate 2	LFQ intensity DMSO Replicate 3	LFQ intensity DMSO Replicate 4	LFQ intensity Compound 3 Replicate 1	LFQ intensity Compound 3 Replicate 2	LFQ intensity Compound 3 Replicate 3	LFQ intensity Compound 3 Replicate 4	Student's T-test Difference DMSO vs. Compound 3	(-)Log Student's T-test p-value DMSO vs. Compound 3
[truncated: 808 more rows]

[truncated: 3 more sheets: 8, 13, 15]
